# Supplementary material for: A Transcription Factor Map as Revealed by a Genome-Wide Gene Expression Analysis of Whole-Blood mRNA Transcriptome in Multiple Sclerosis
Source: PLOS journal article supplement (doi:10.1371/journal.pone.0014176), 2010-12-01

# ANKRD36B

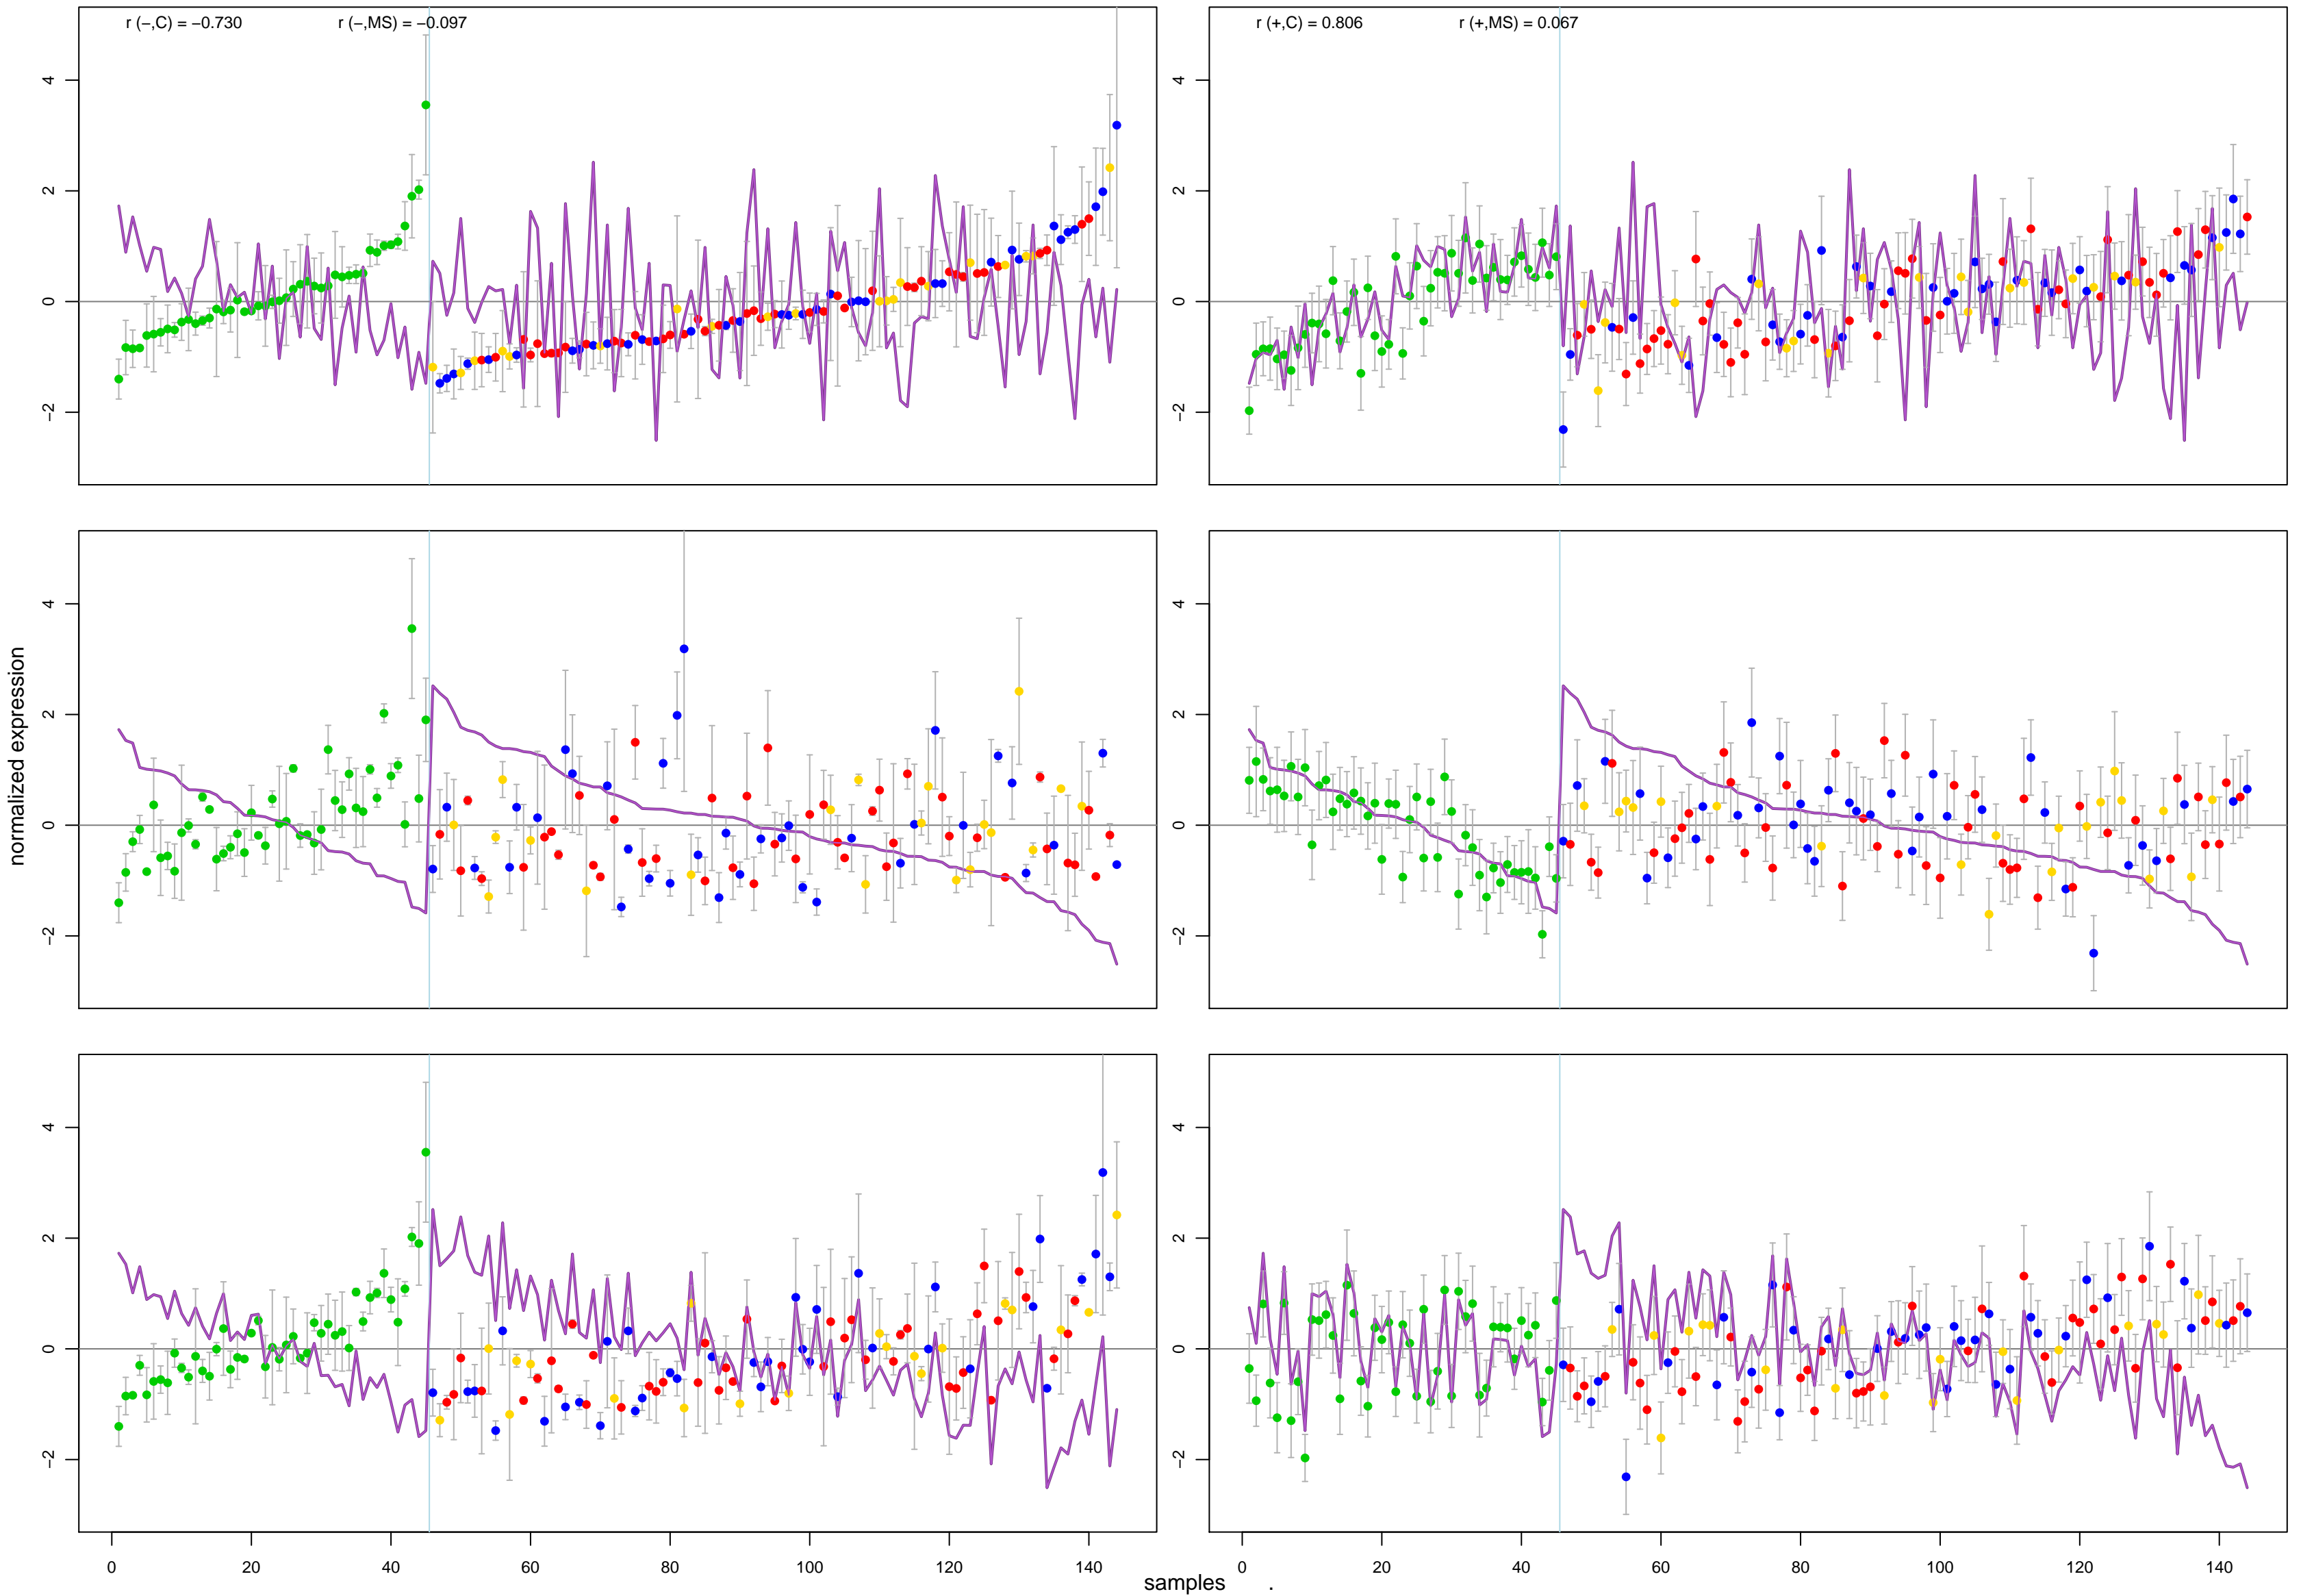

ASPM

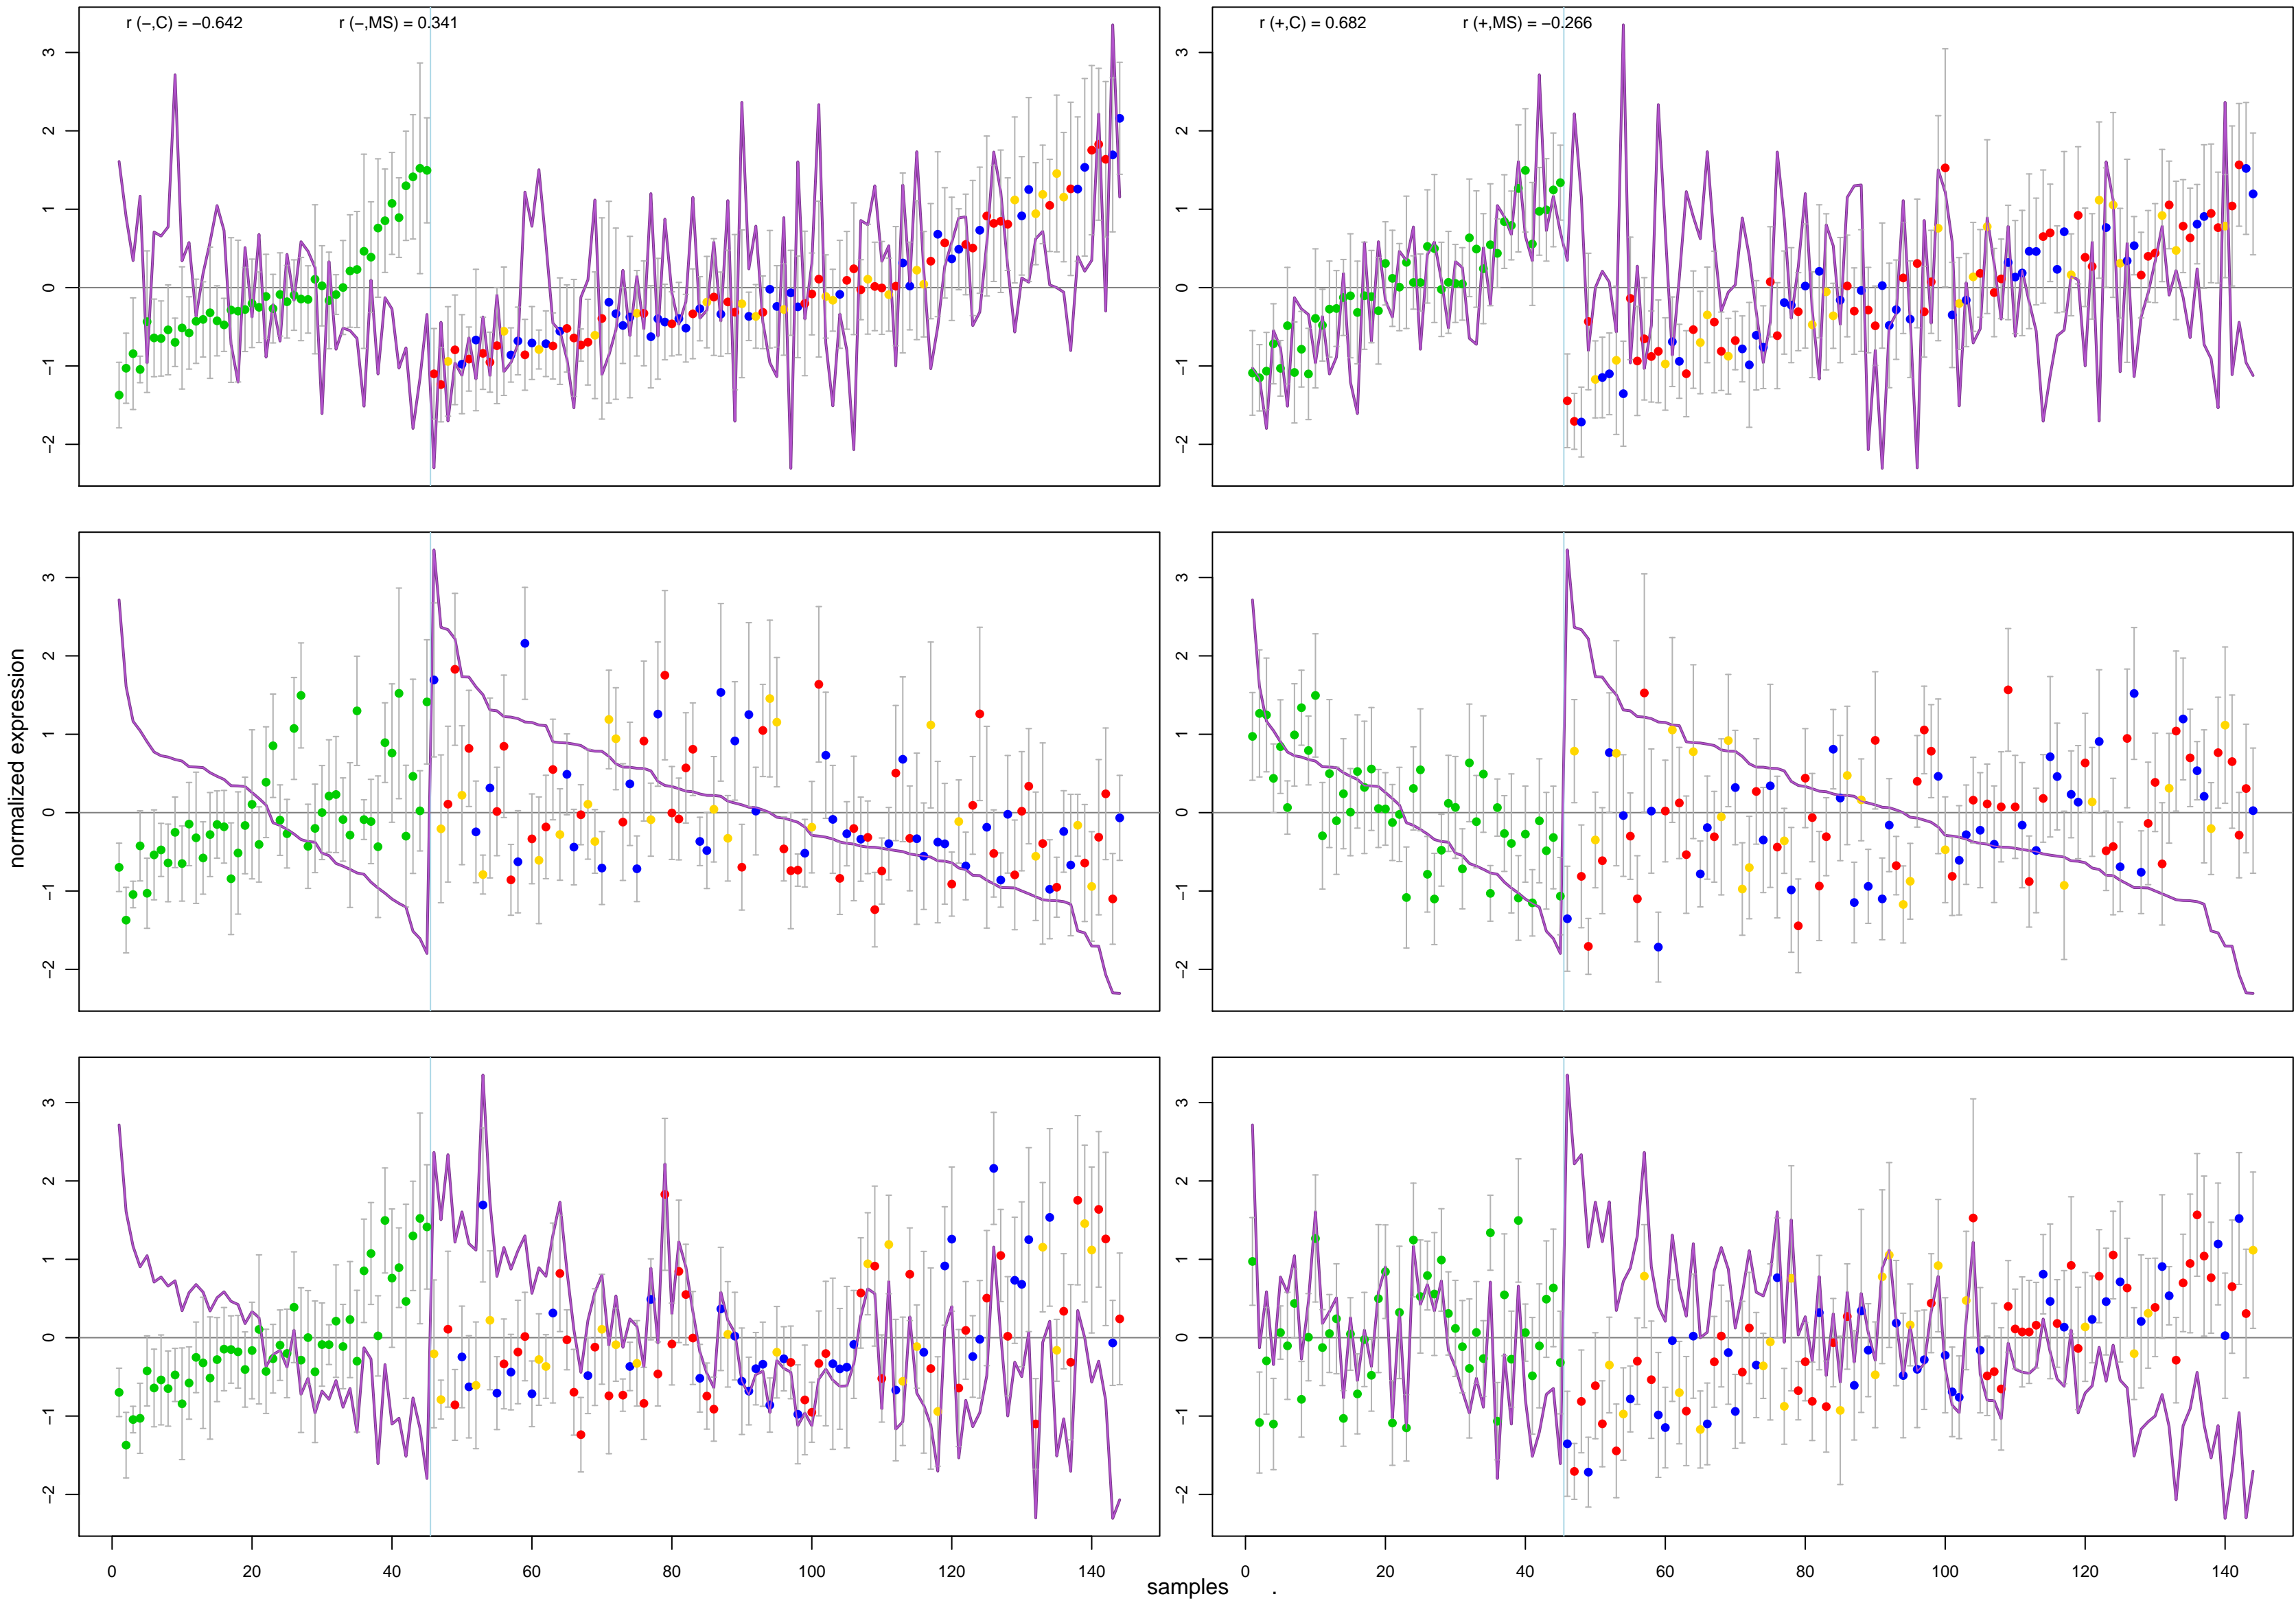

# C20ORF134

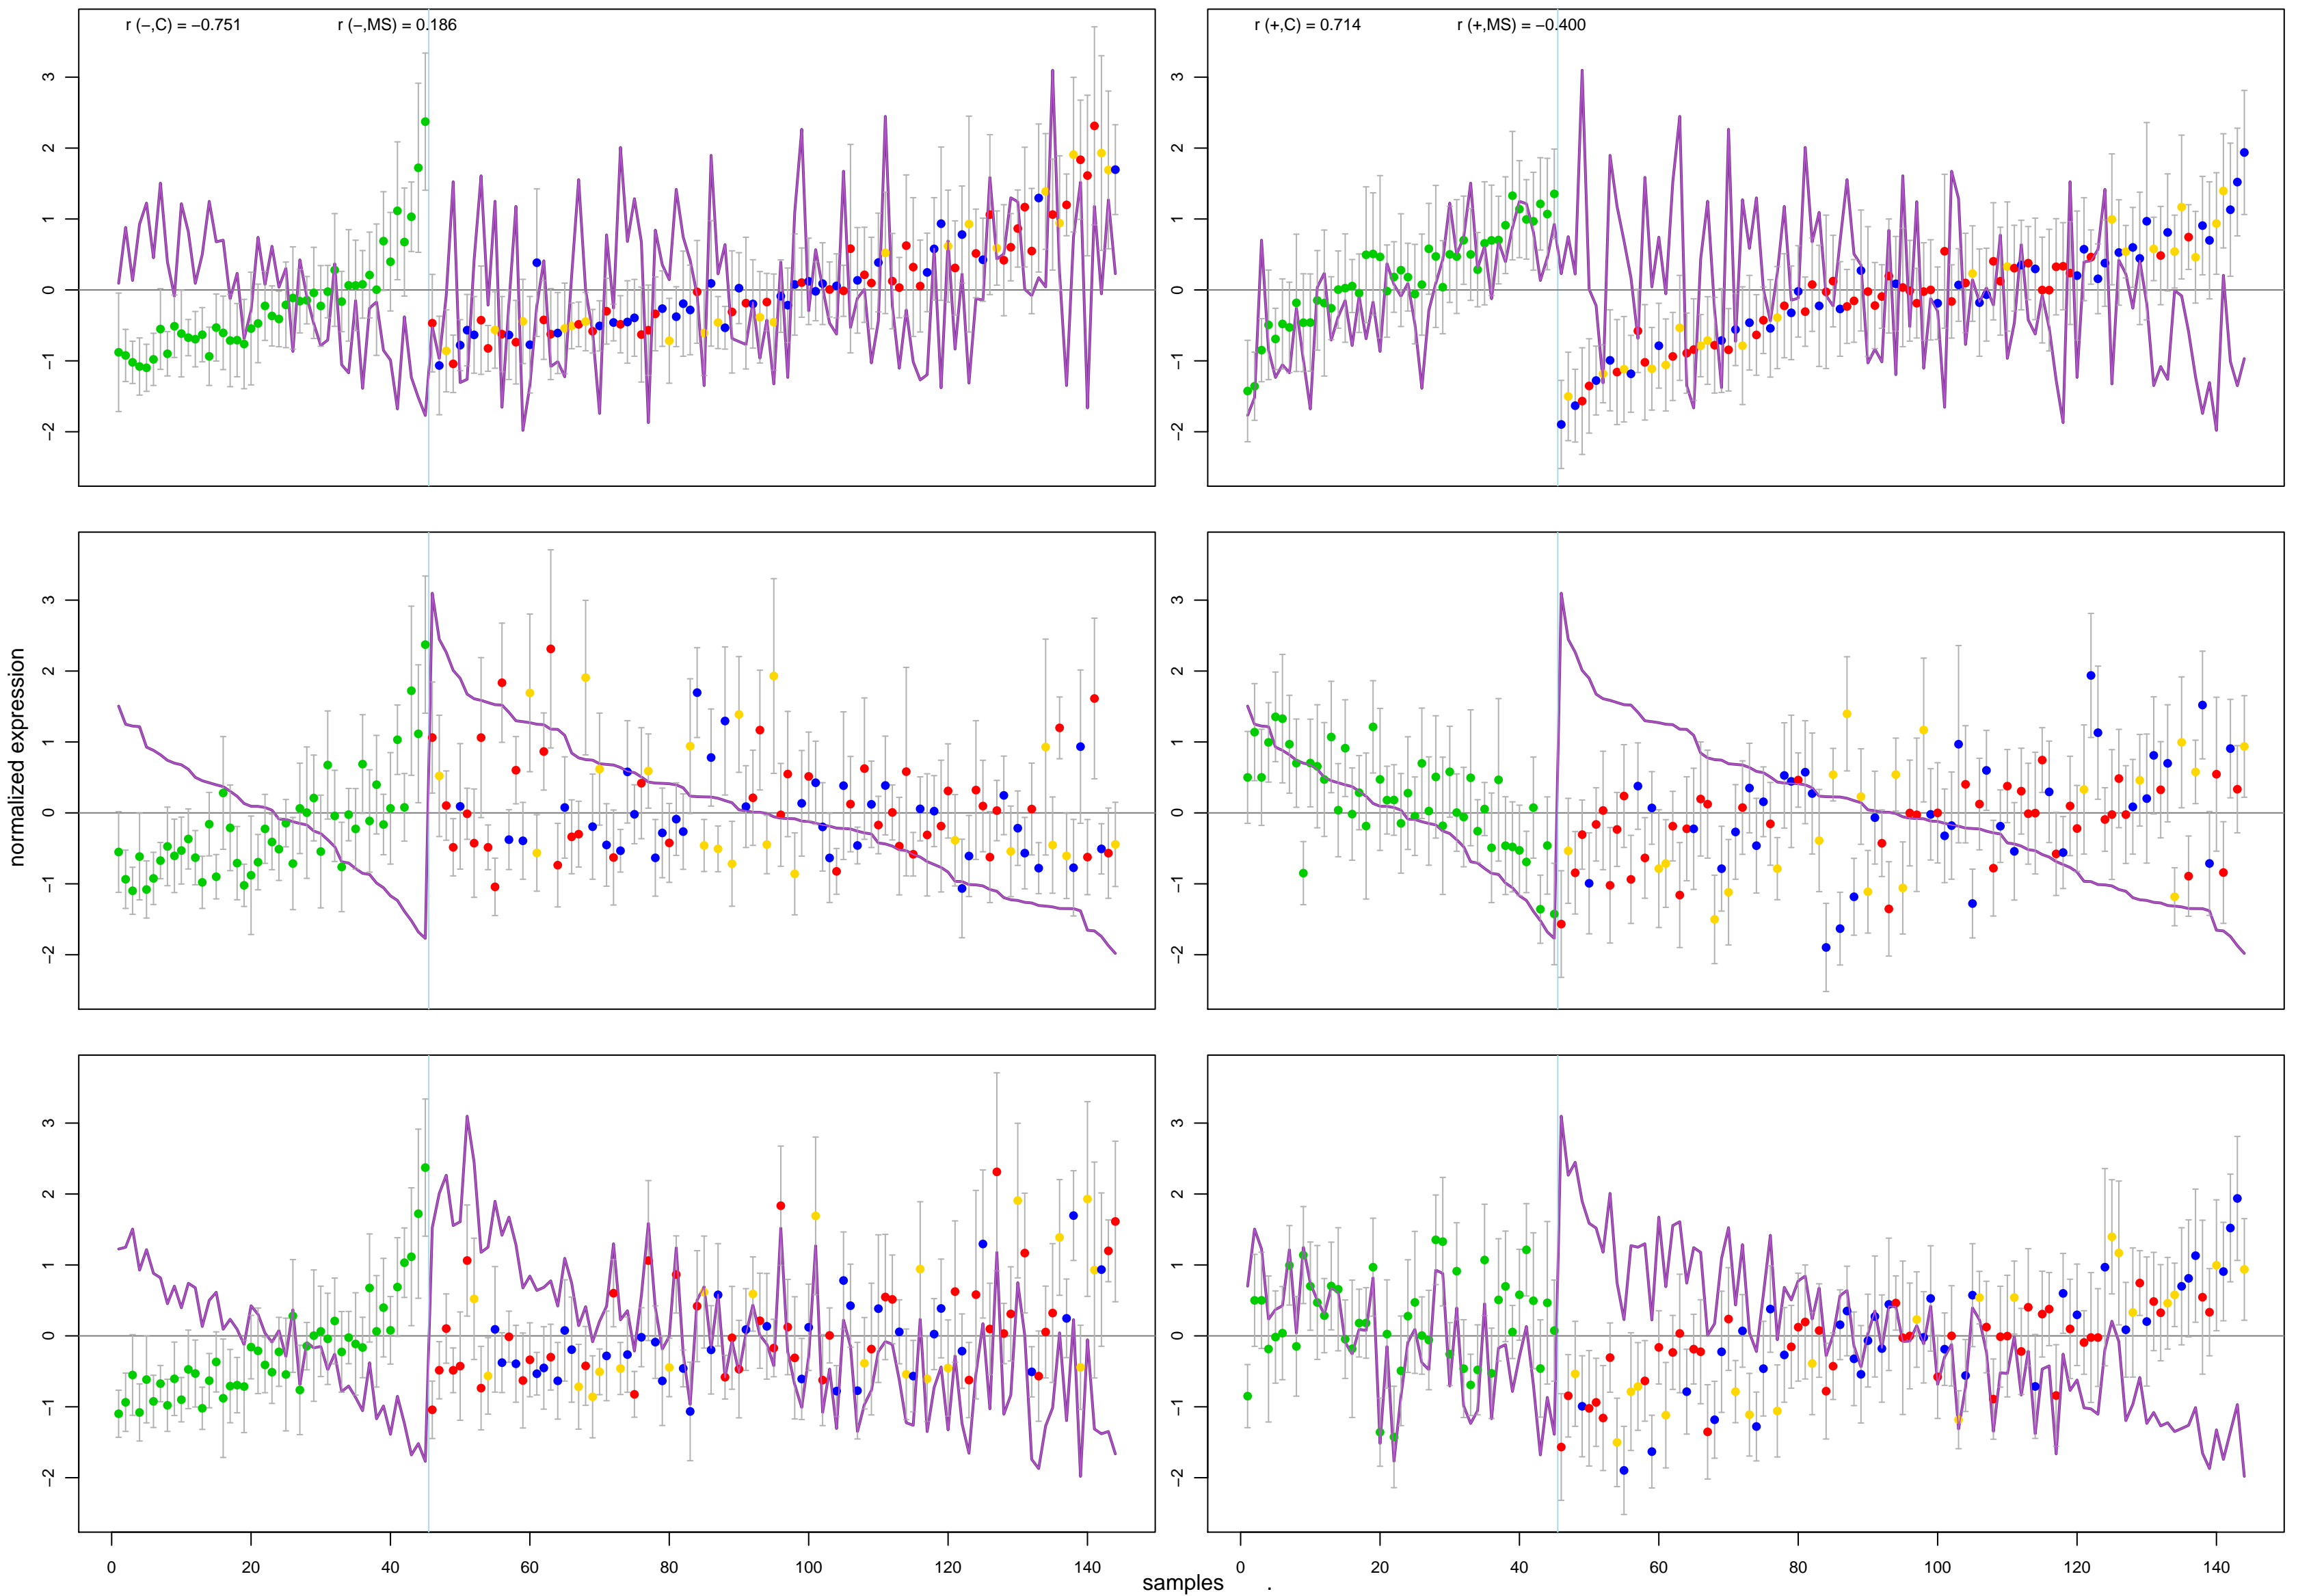



# CMTM4

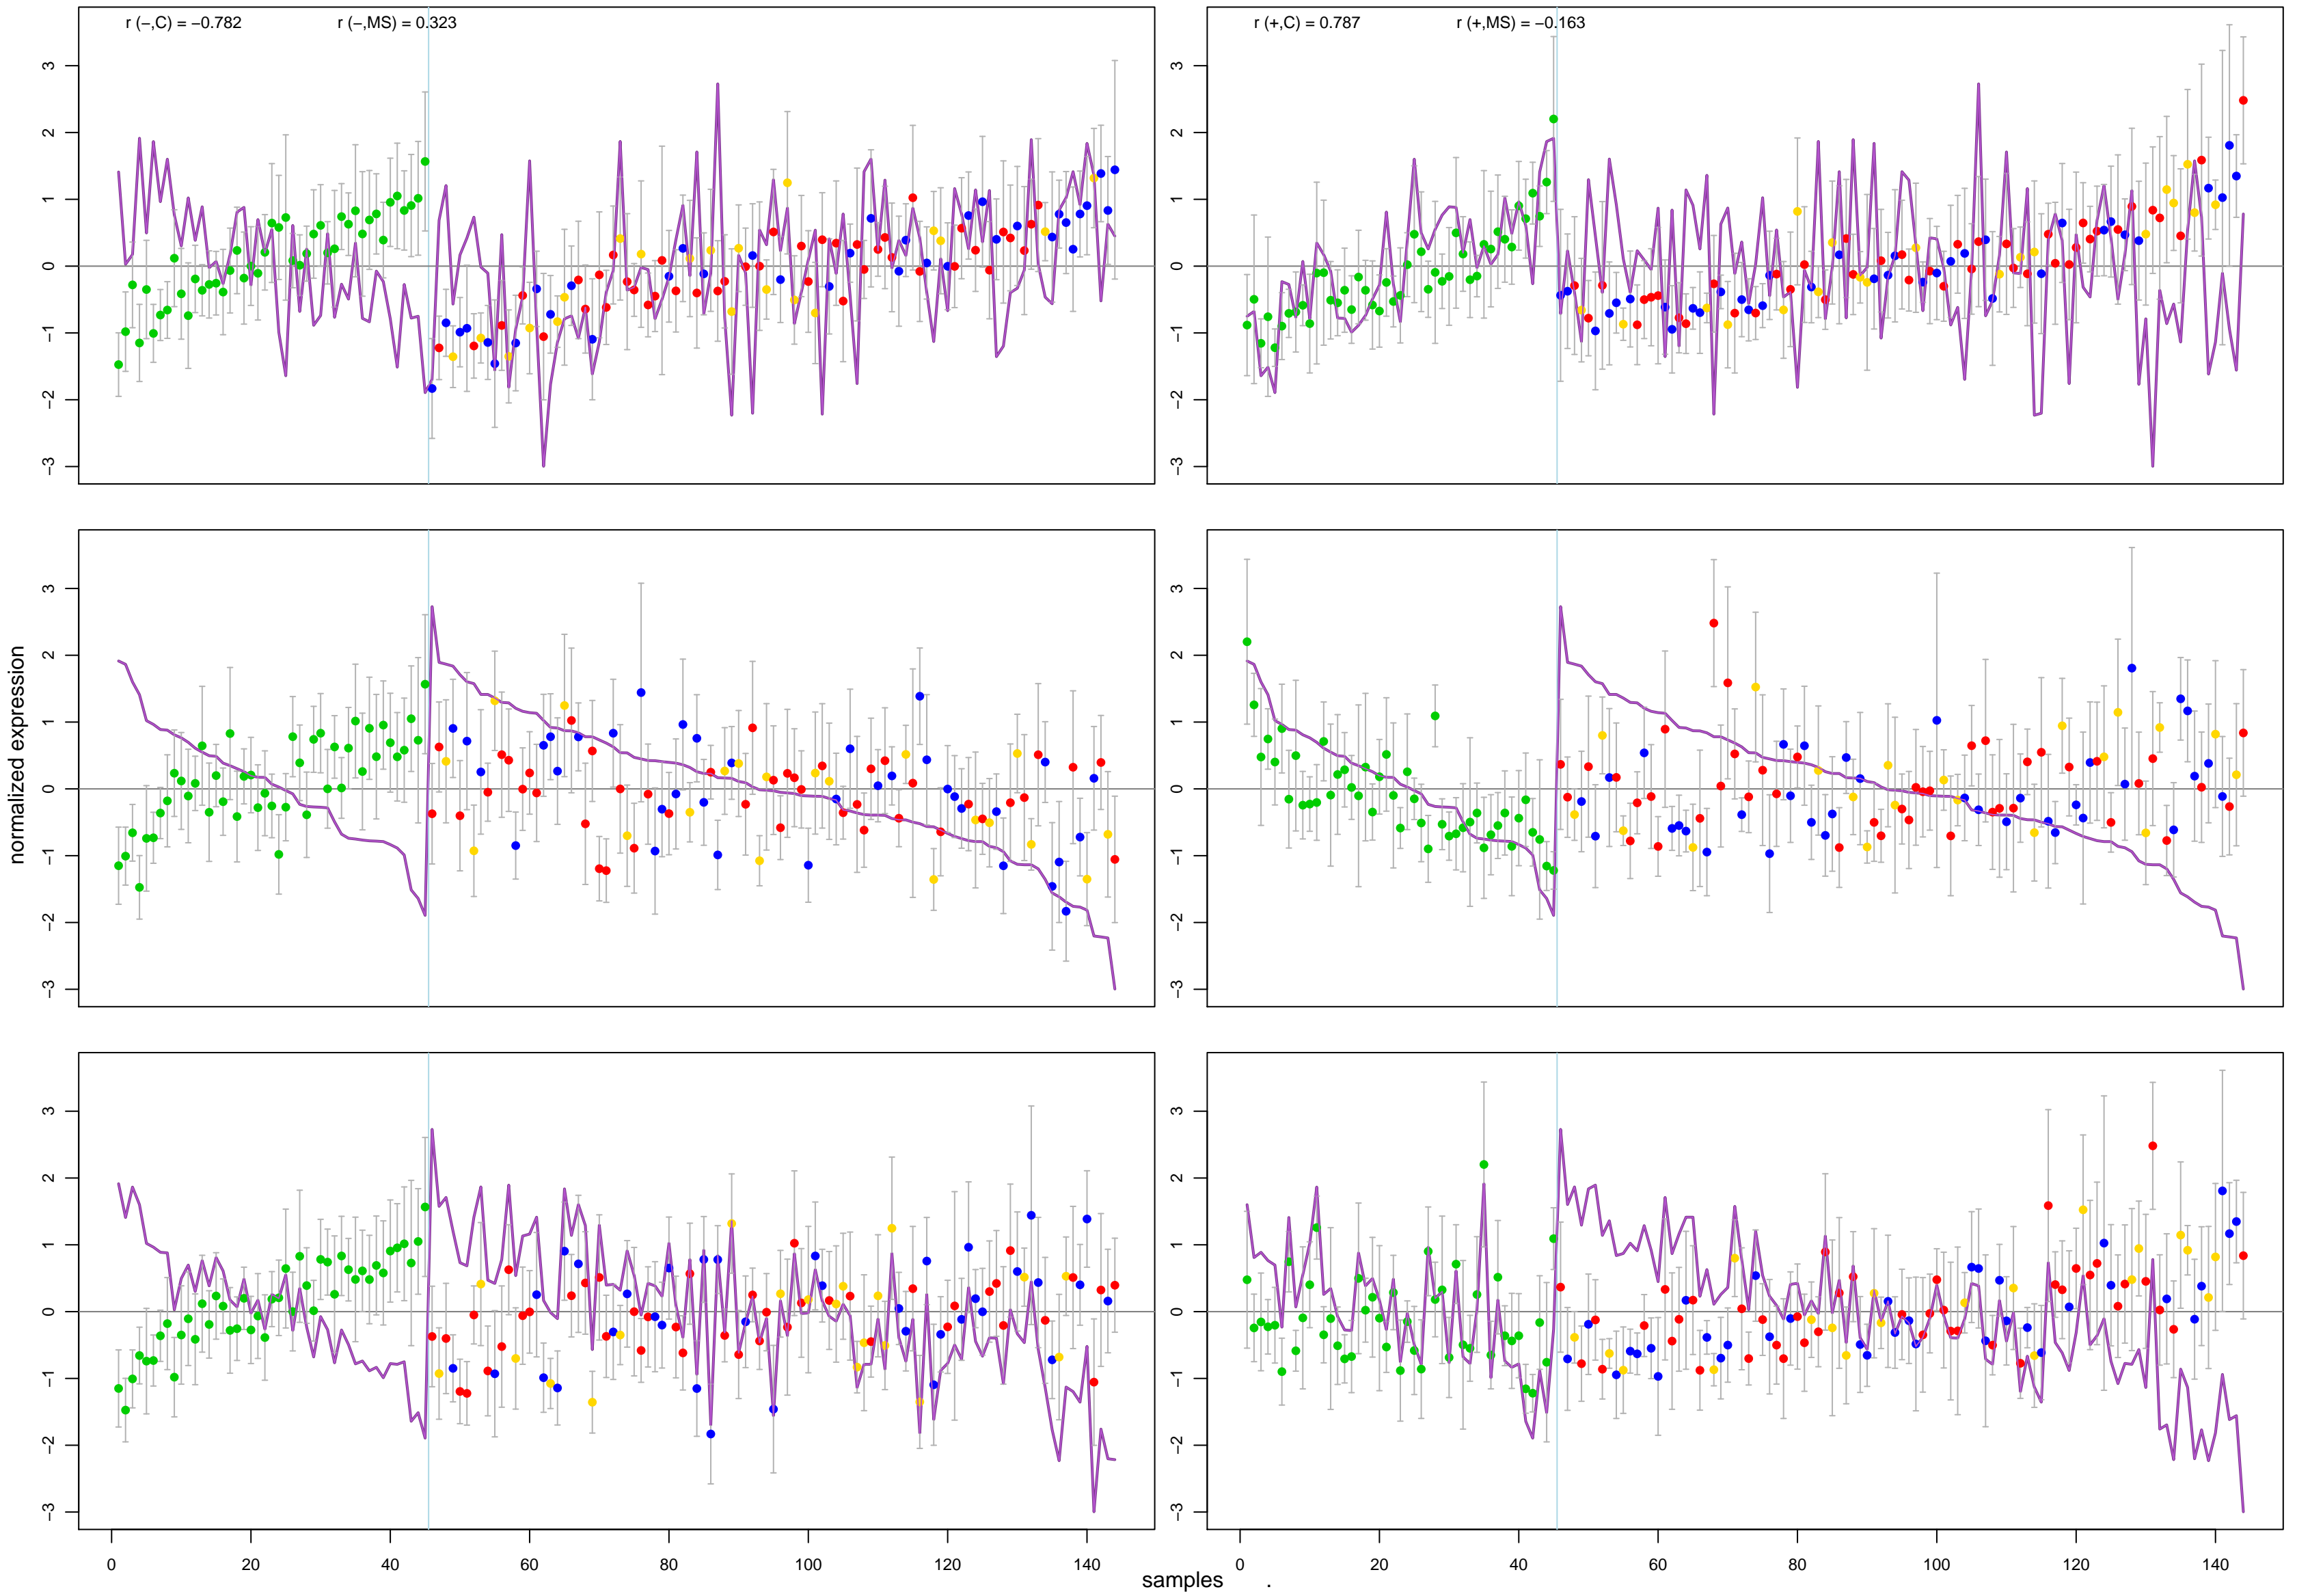

# DAAM1

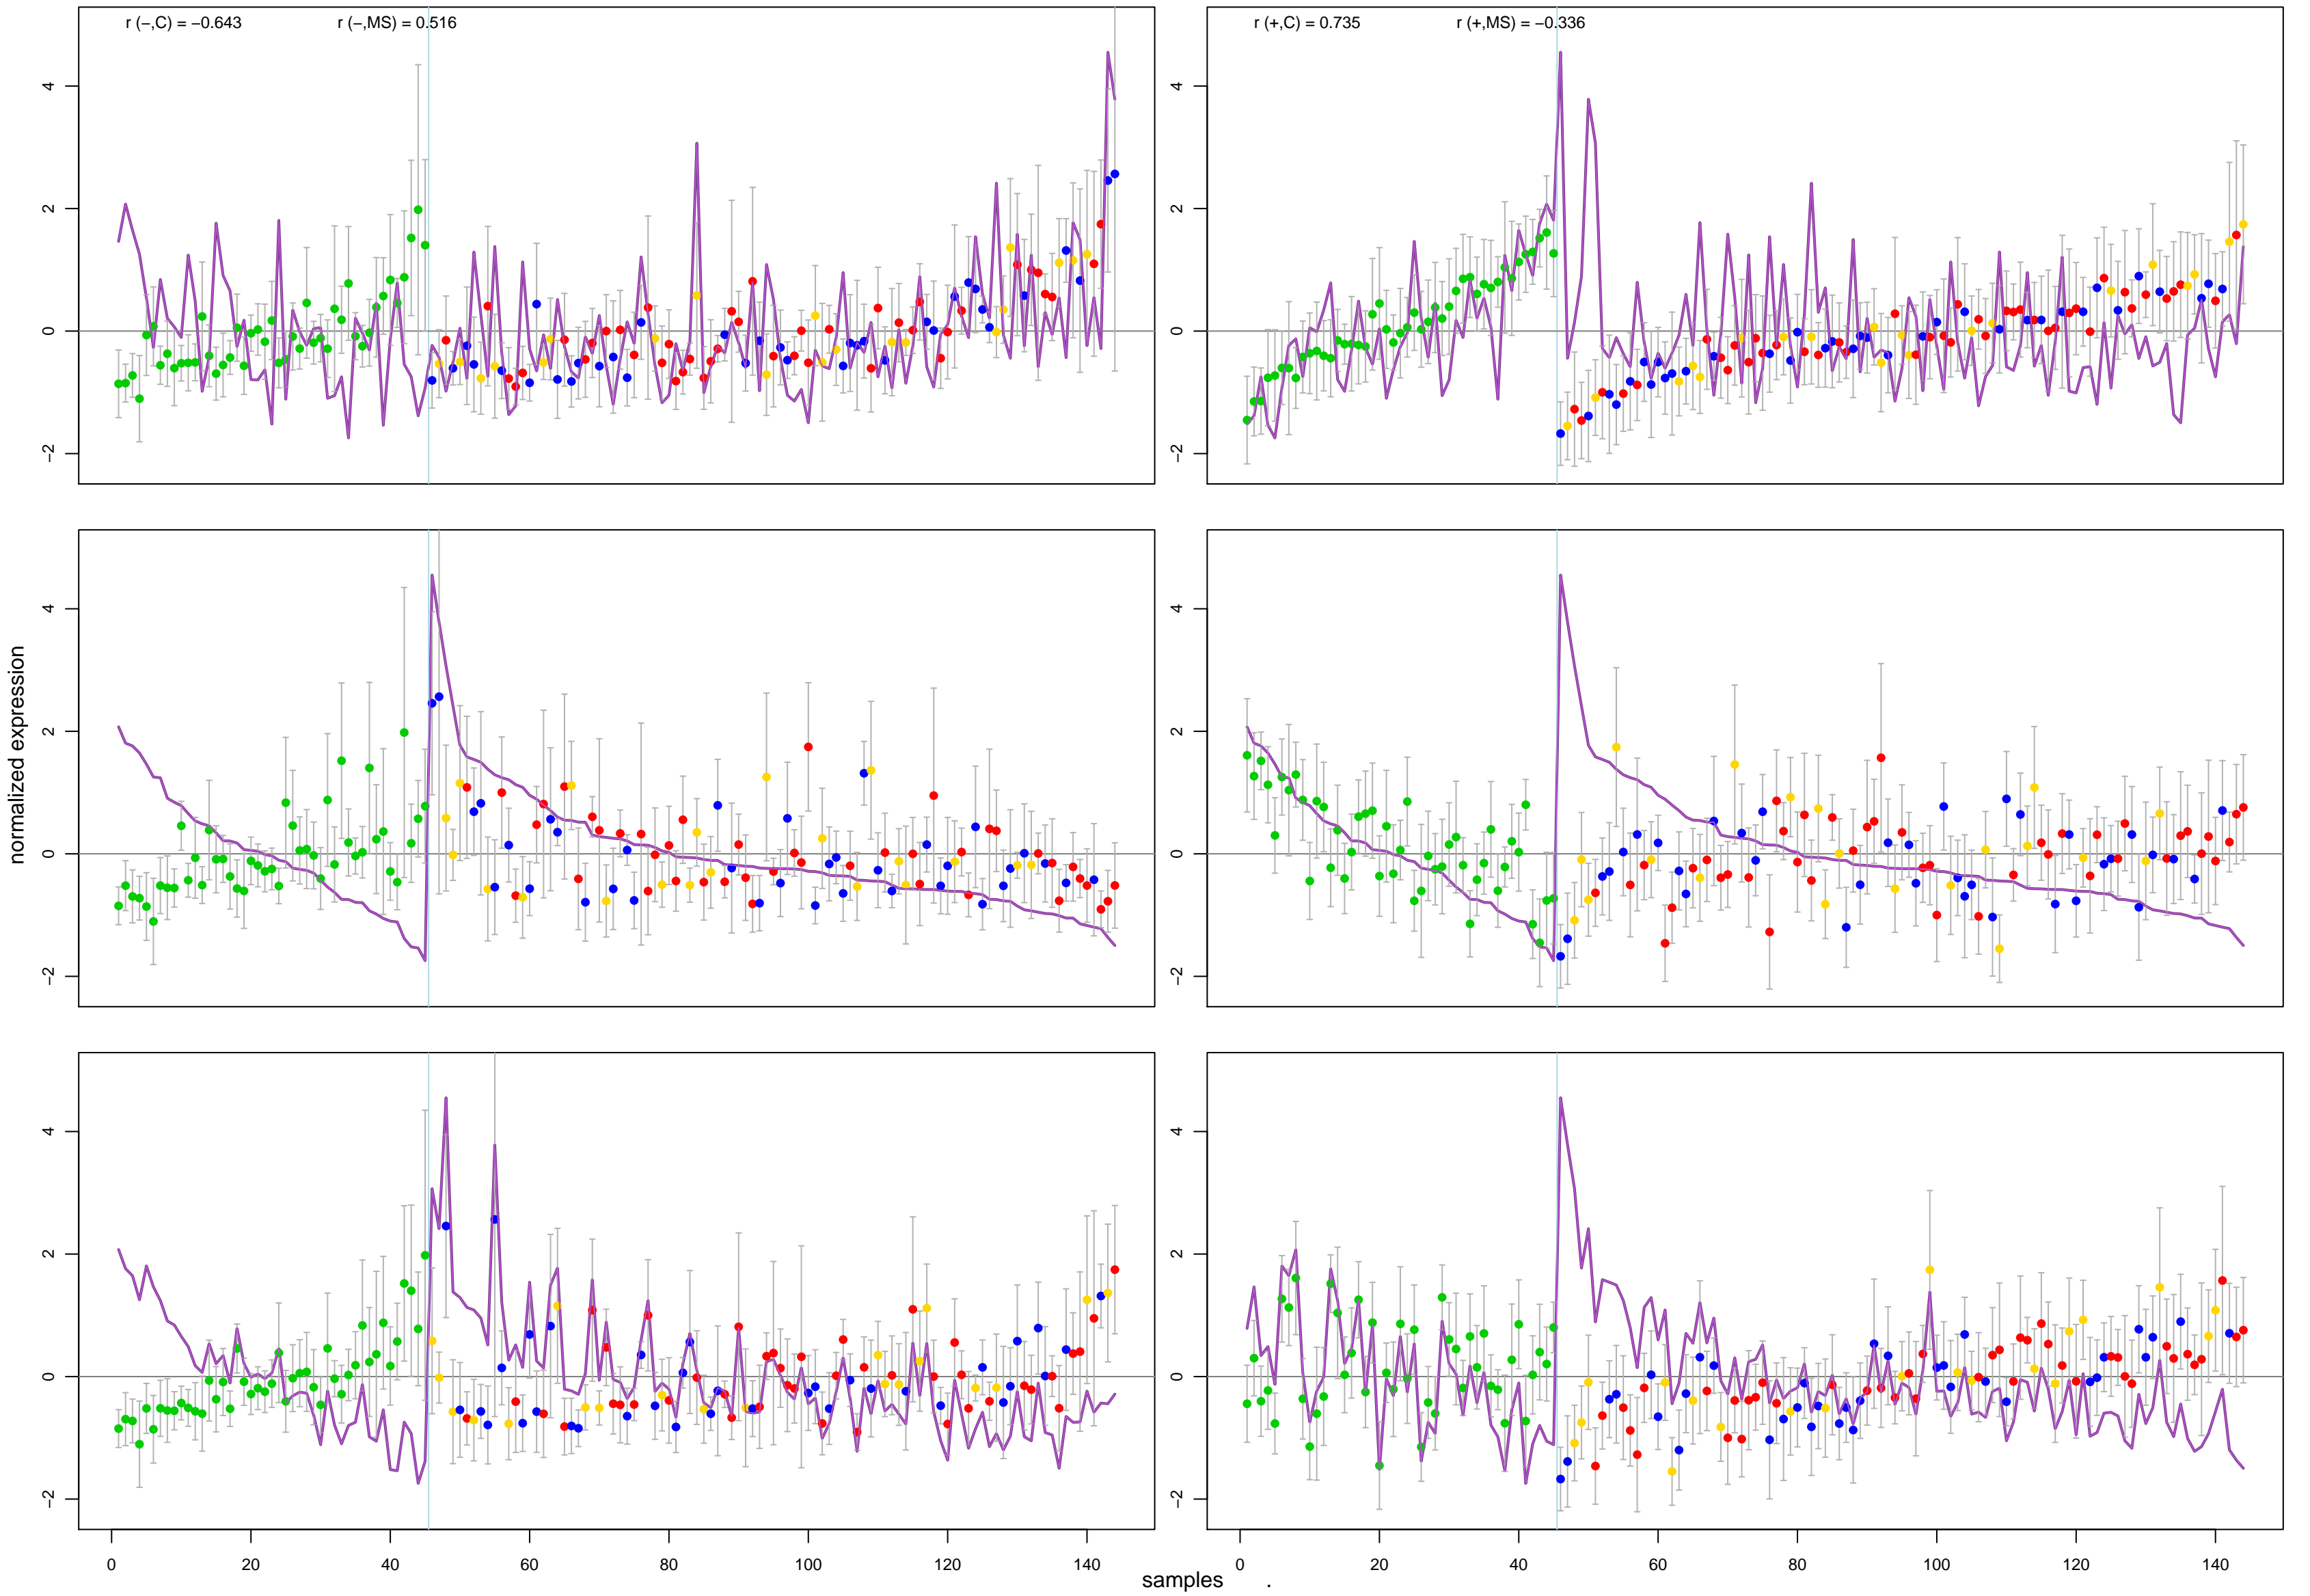

# DPAGT1

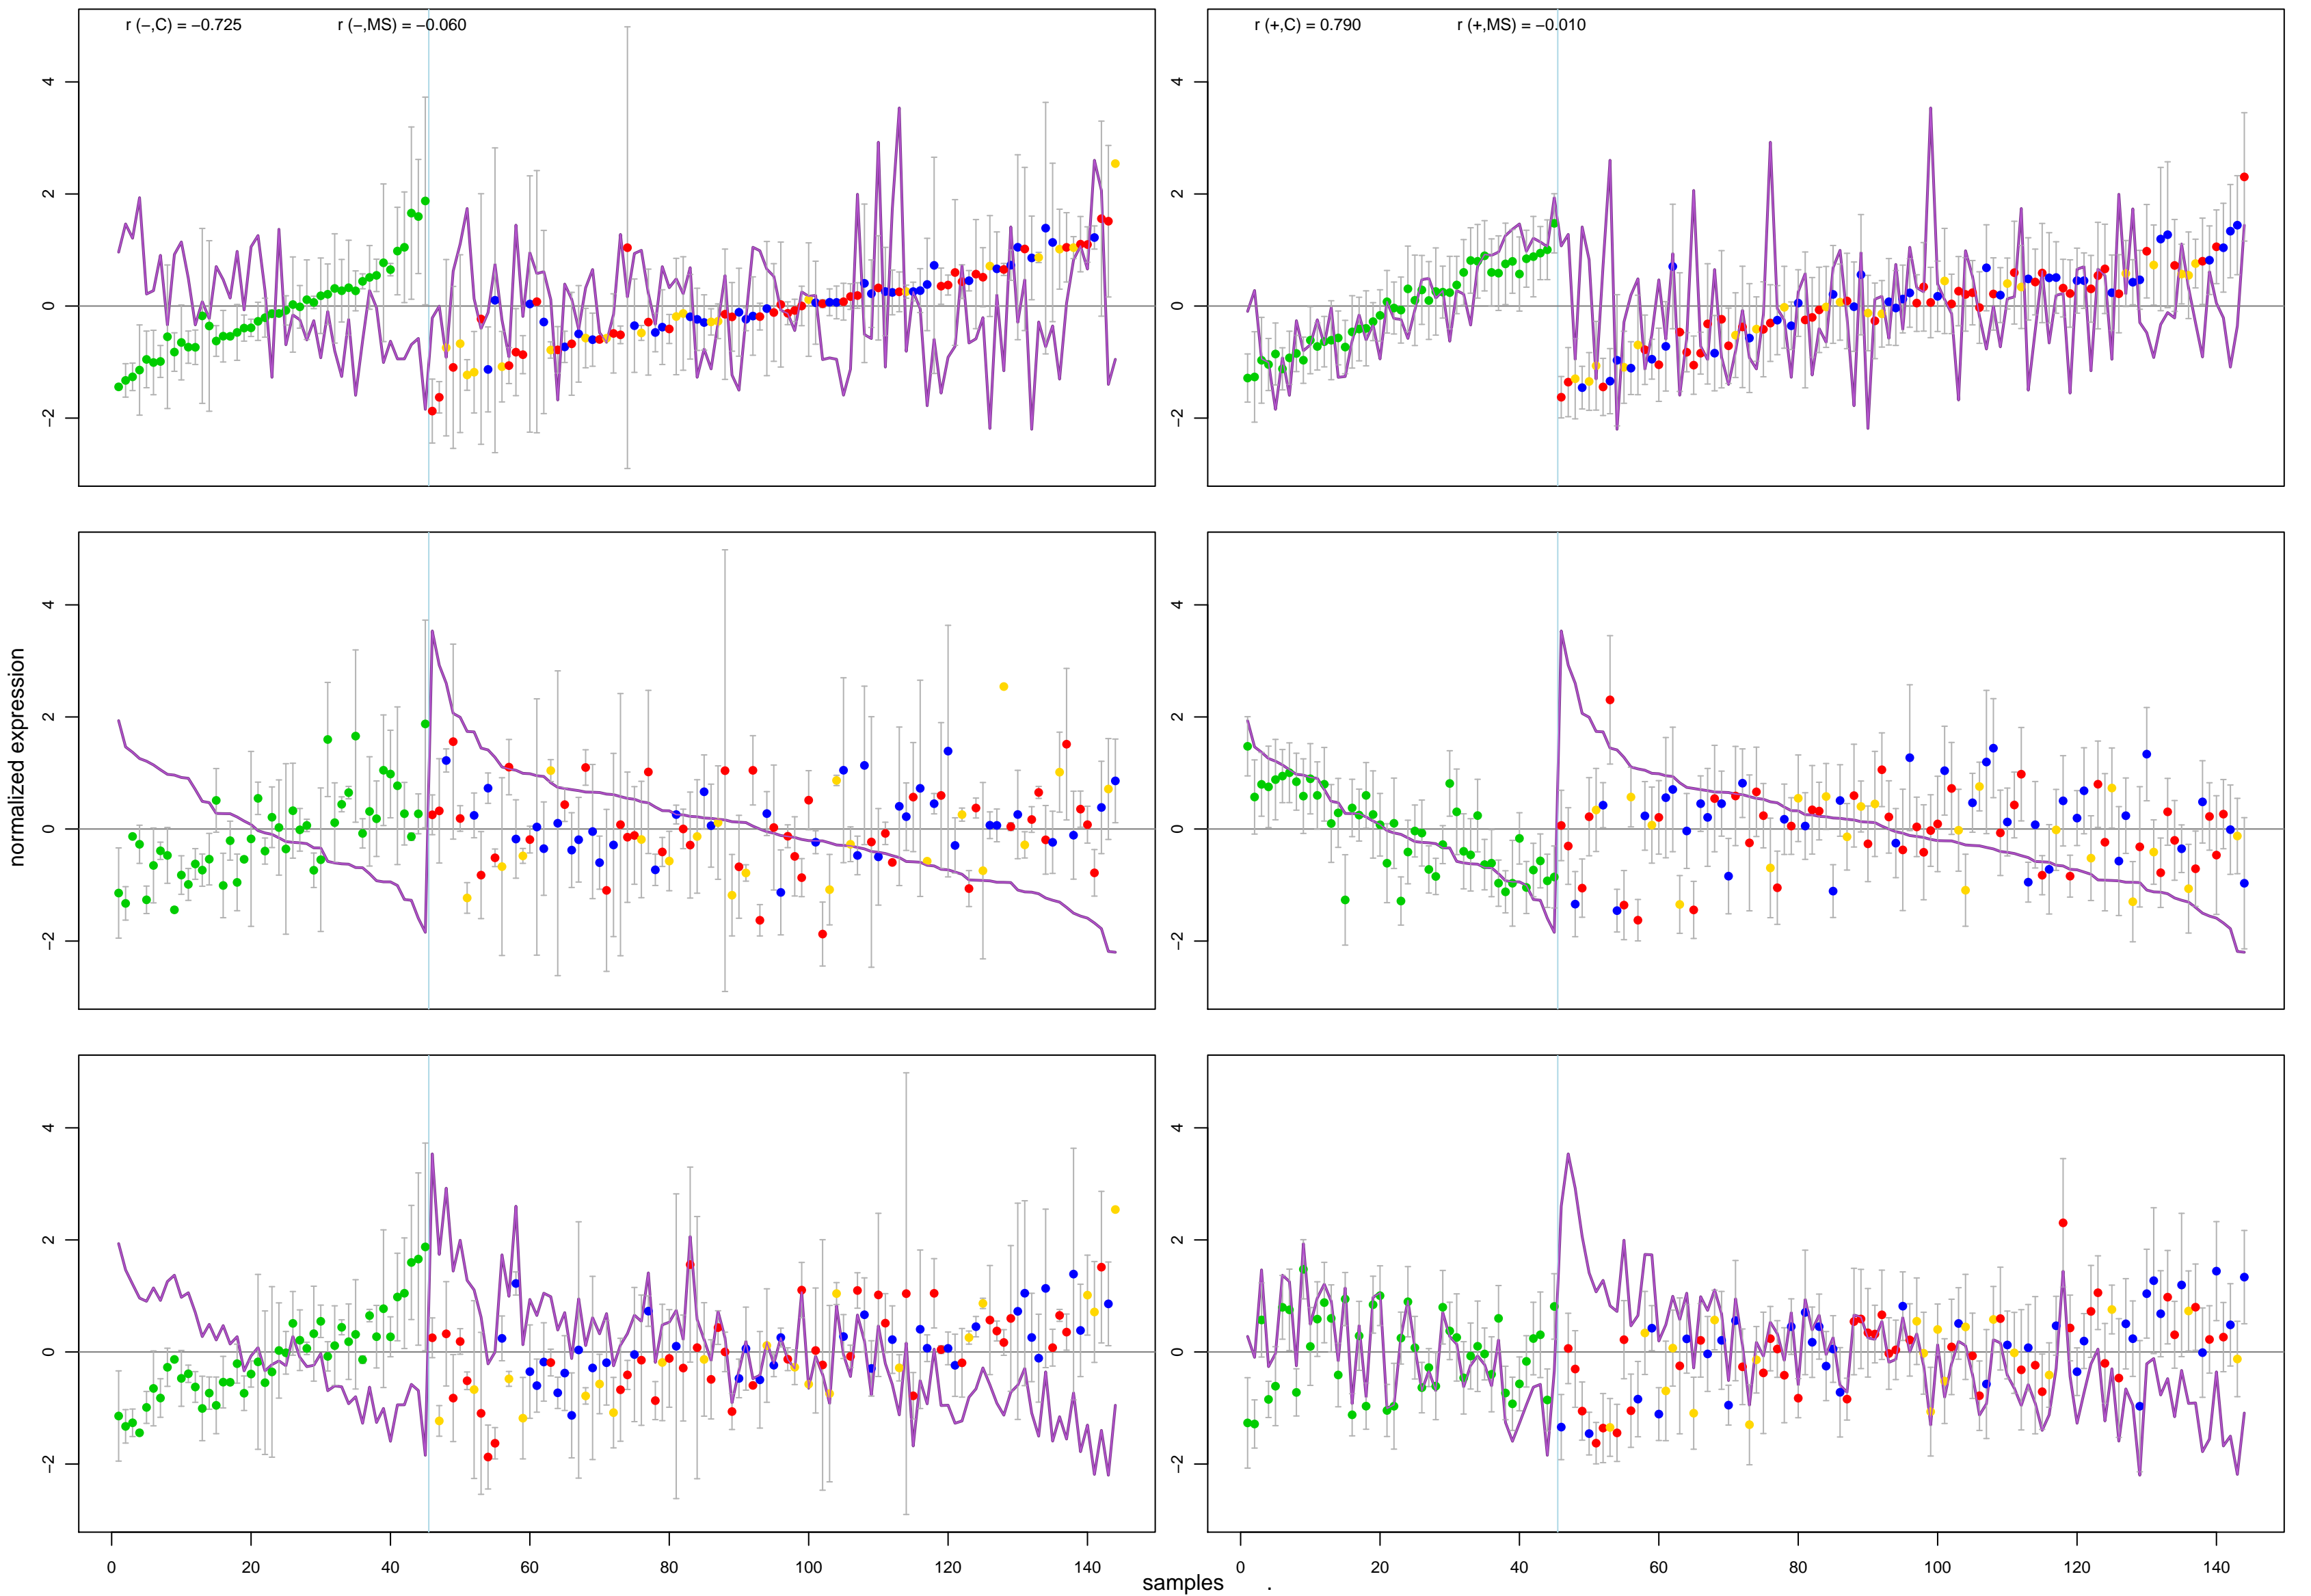

# FAM91A1

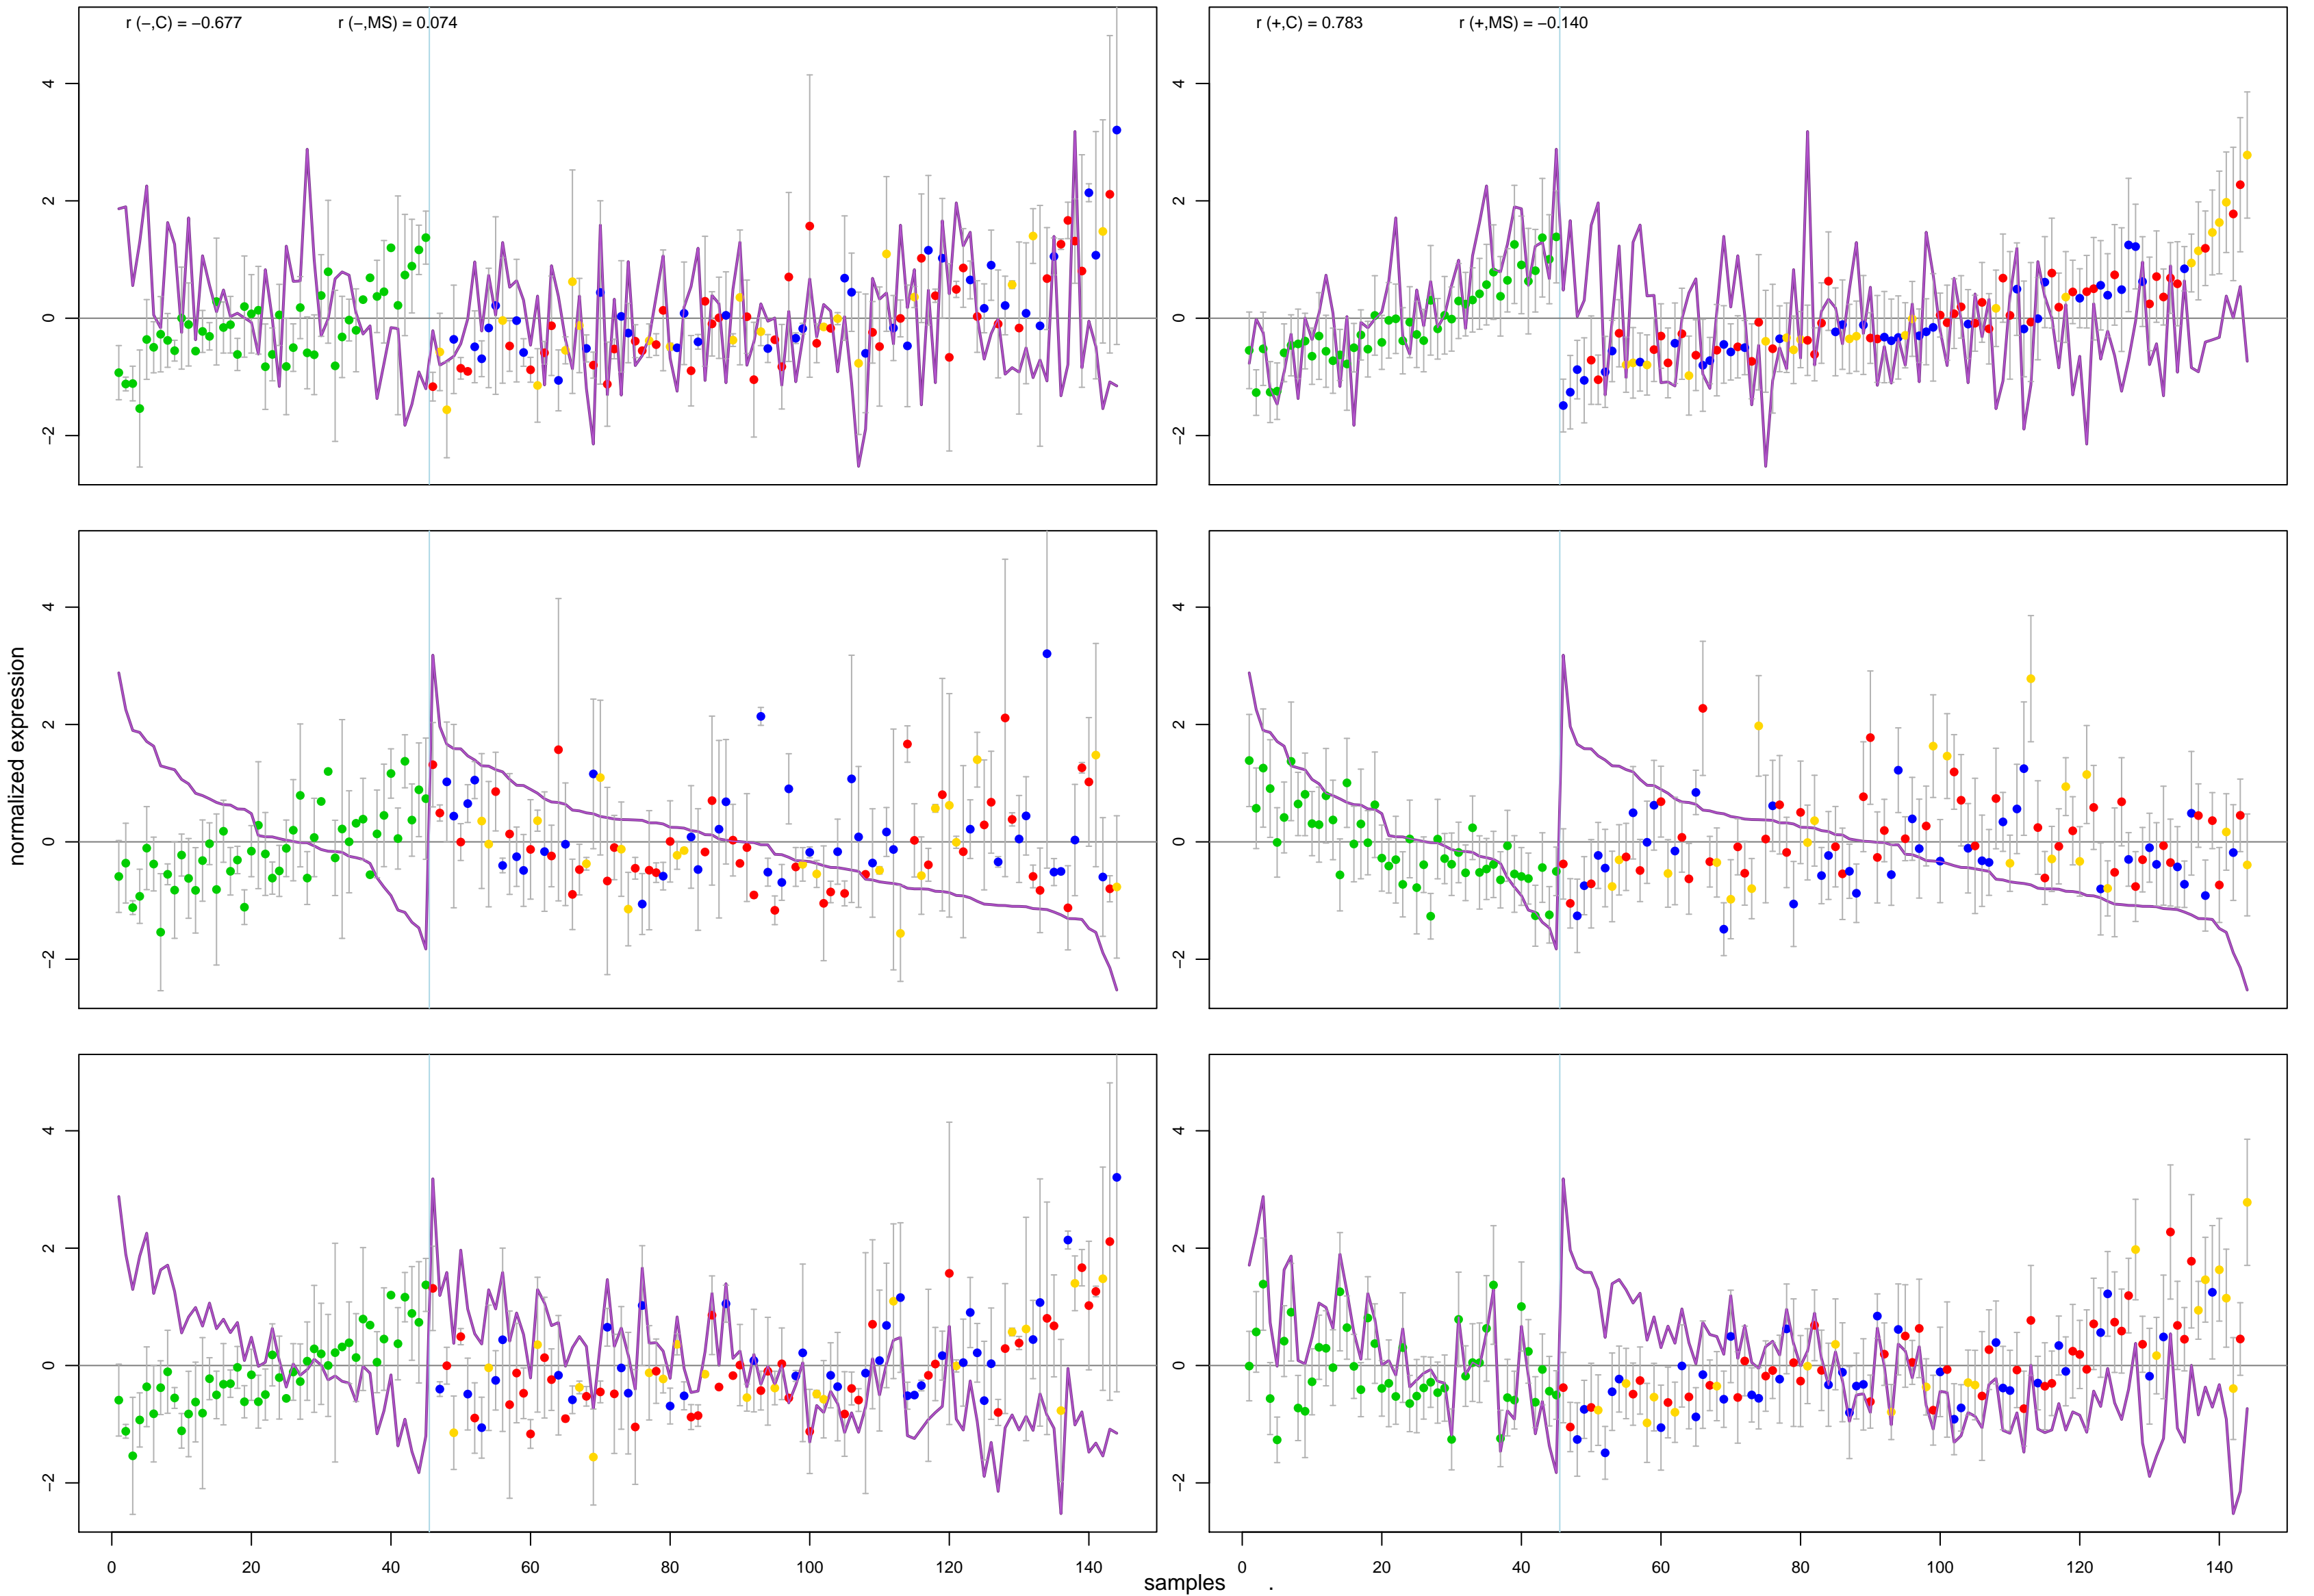



# HNRPR

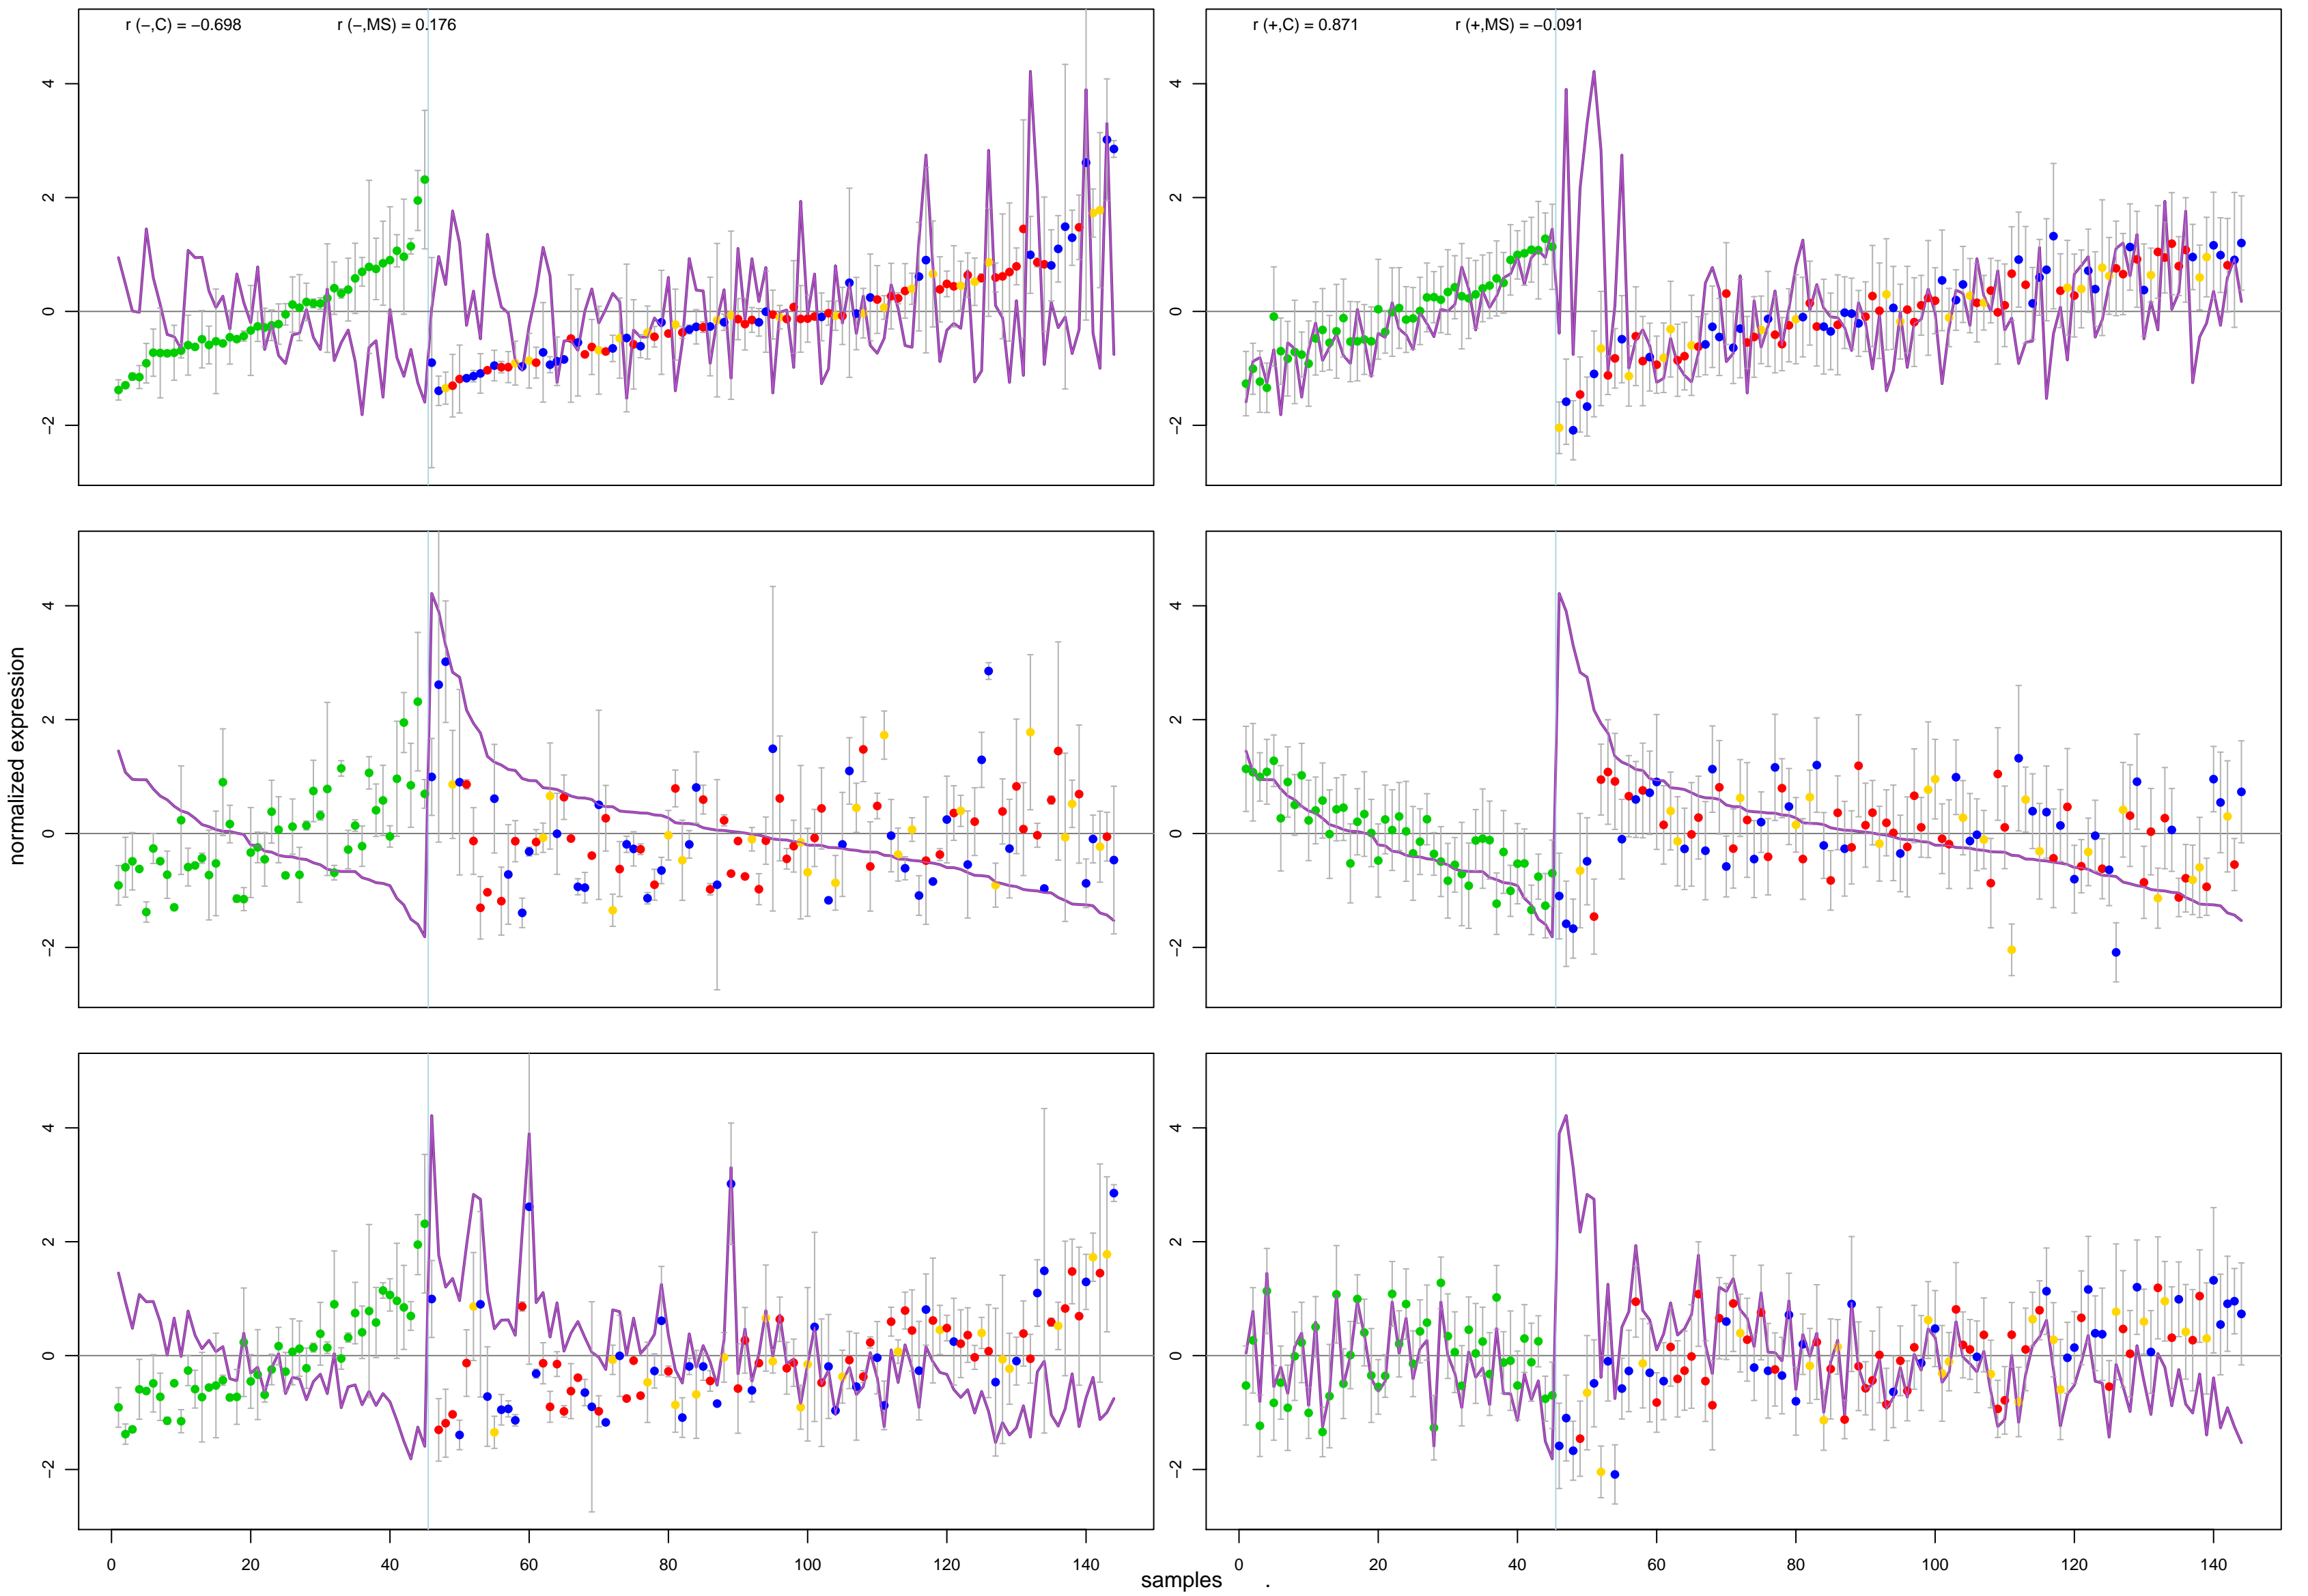



# HS.119225 (ZZEF1)

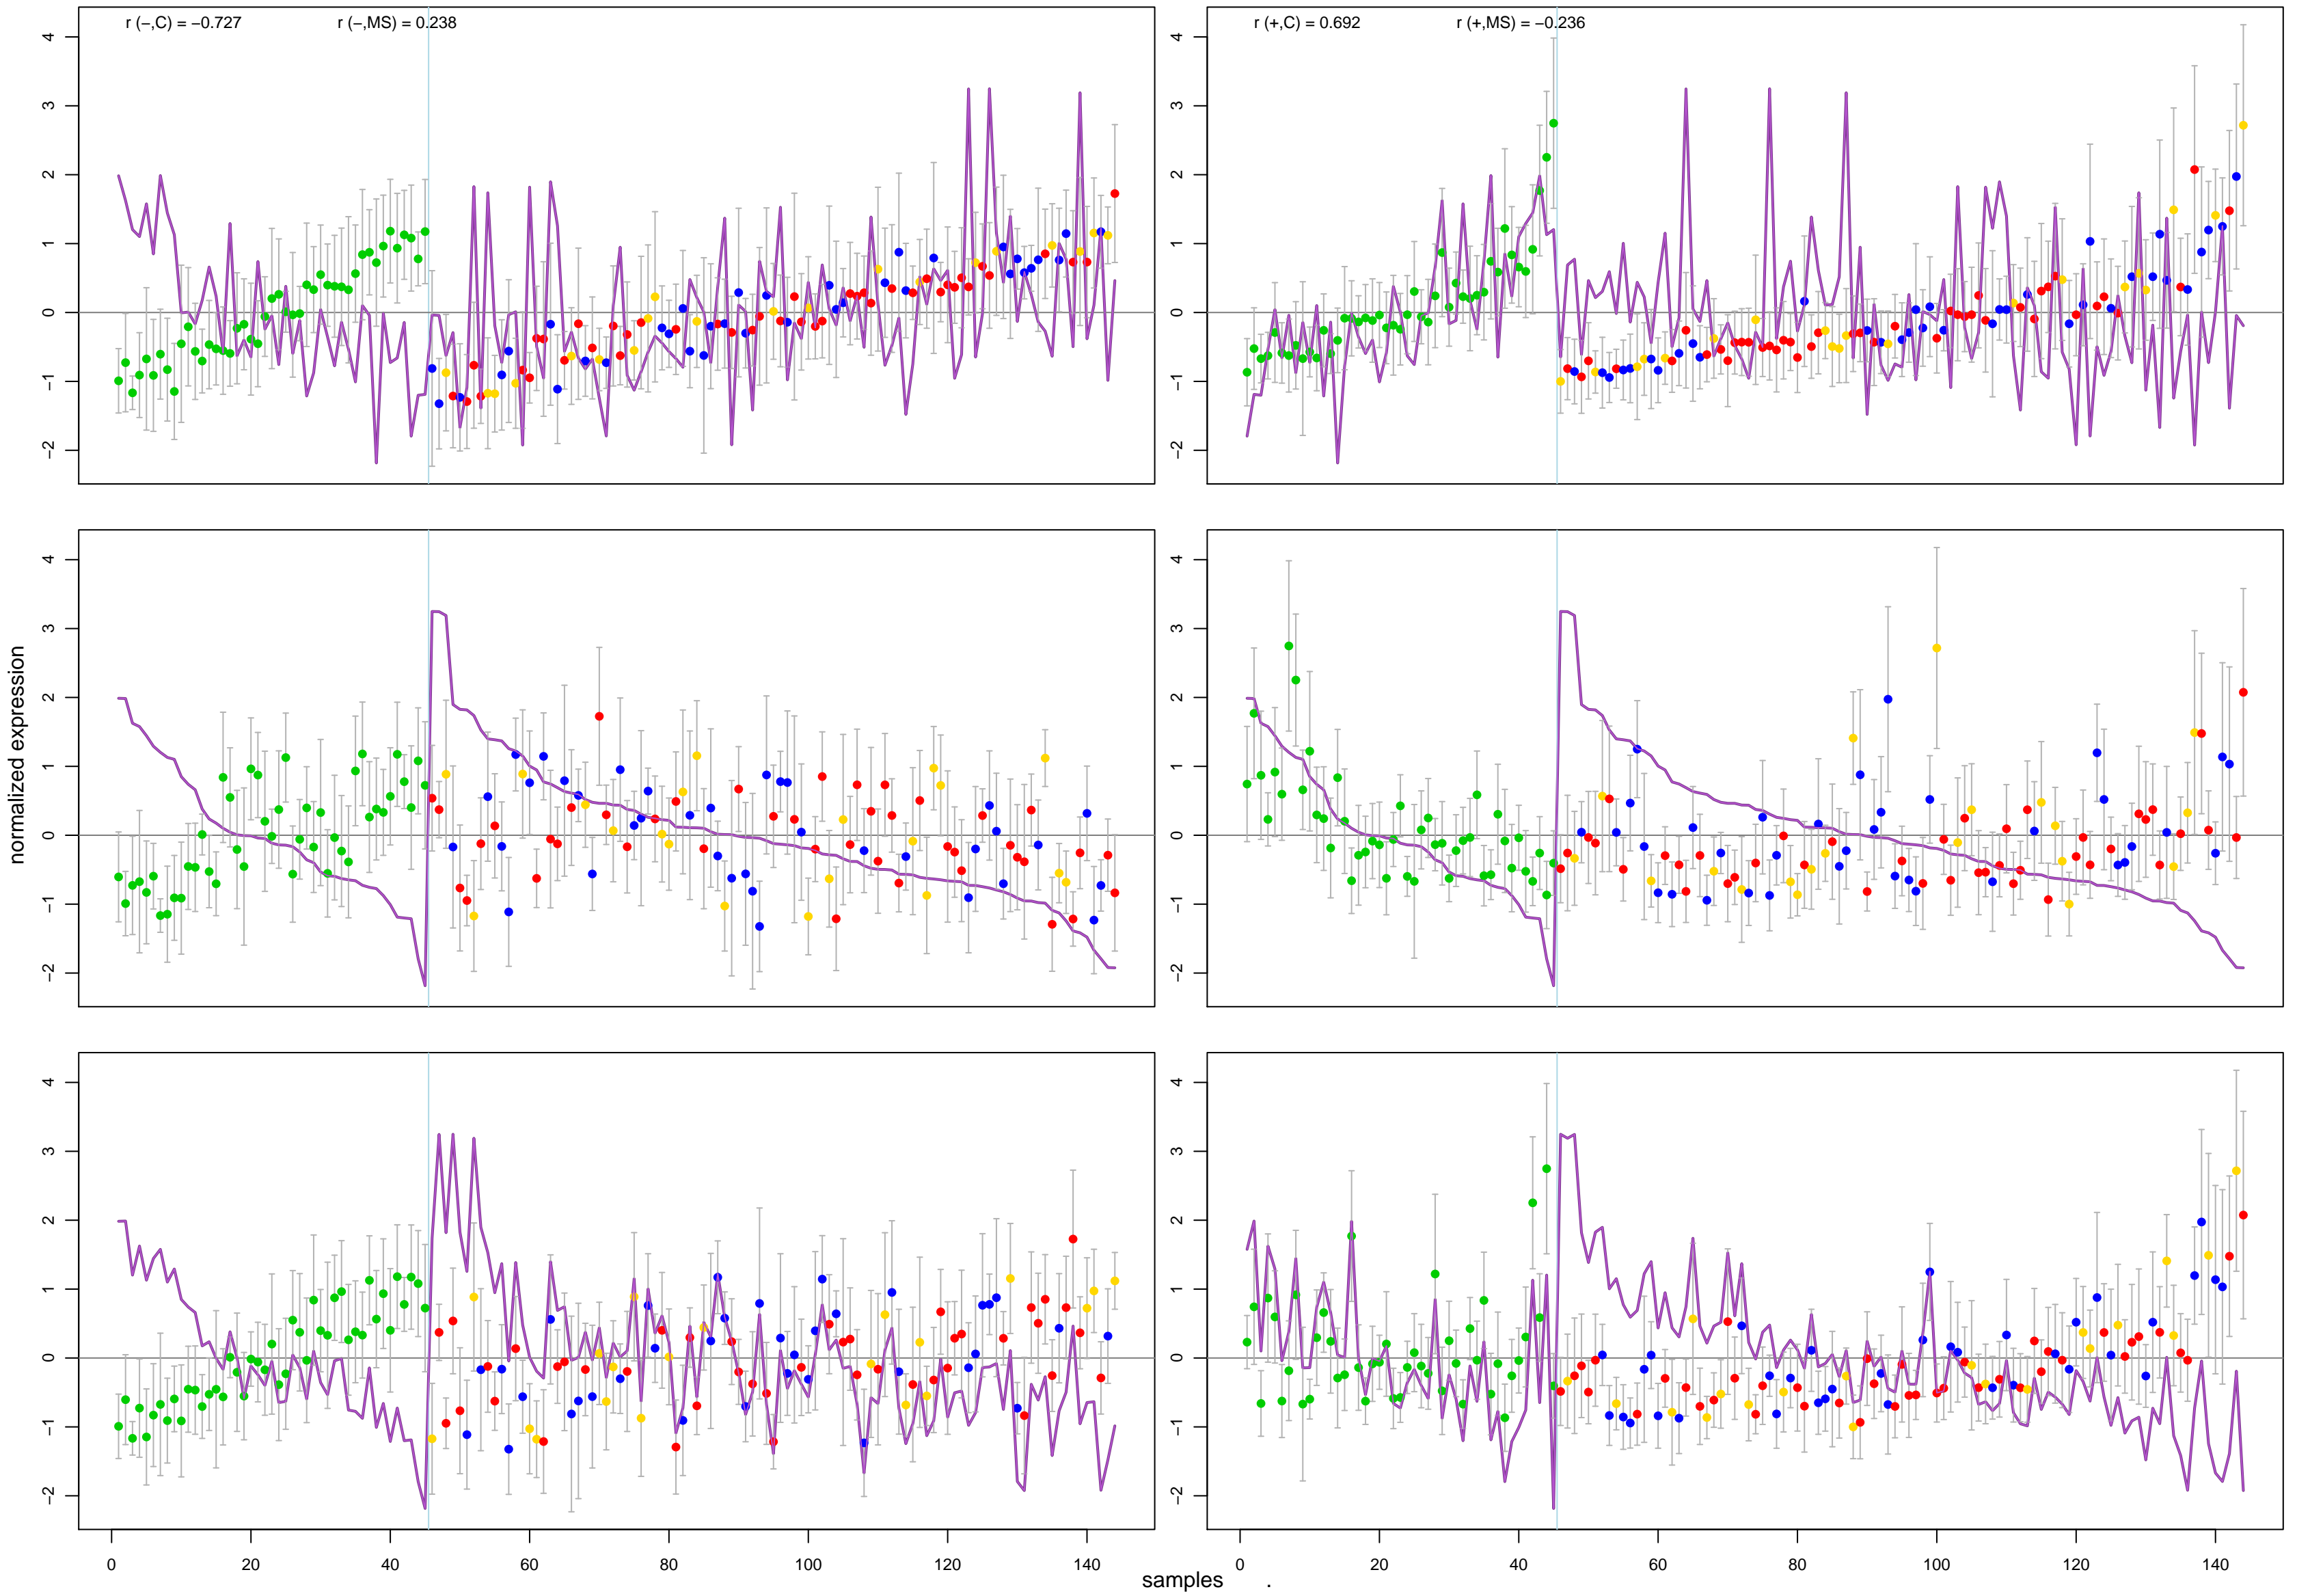

HS.170953

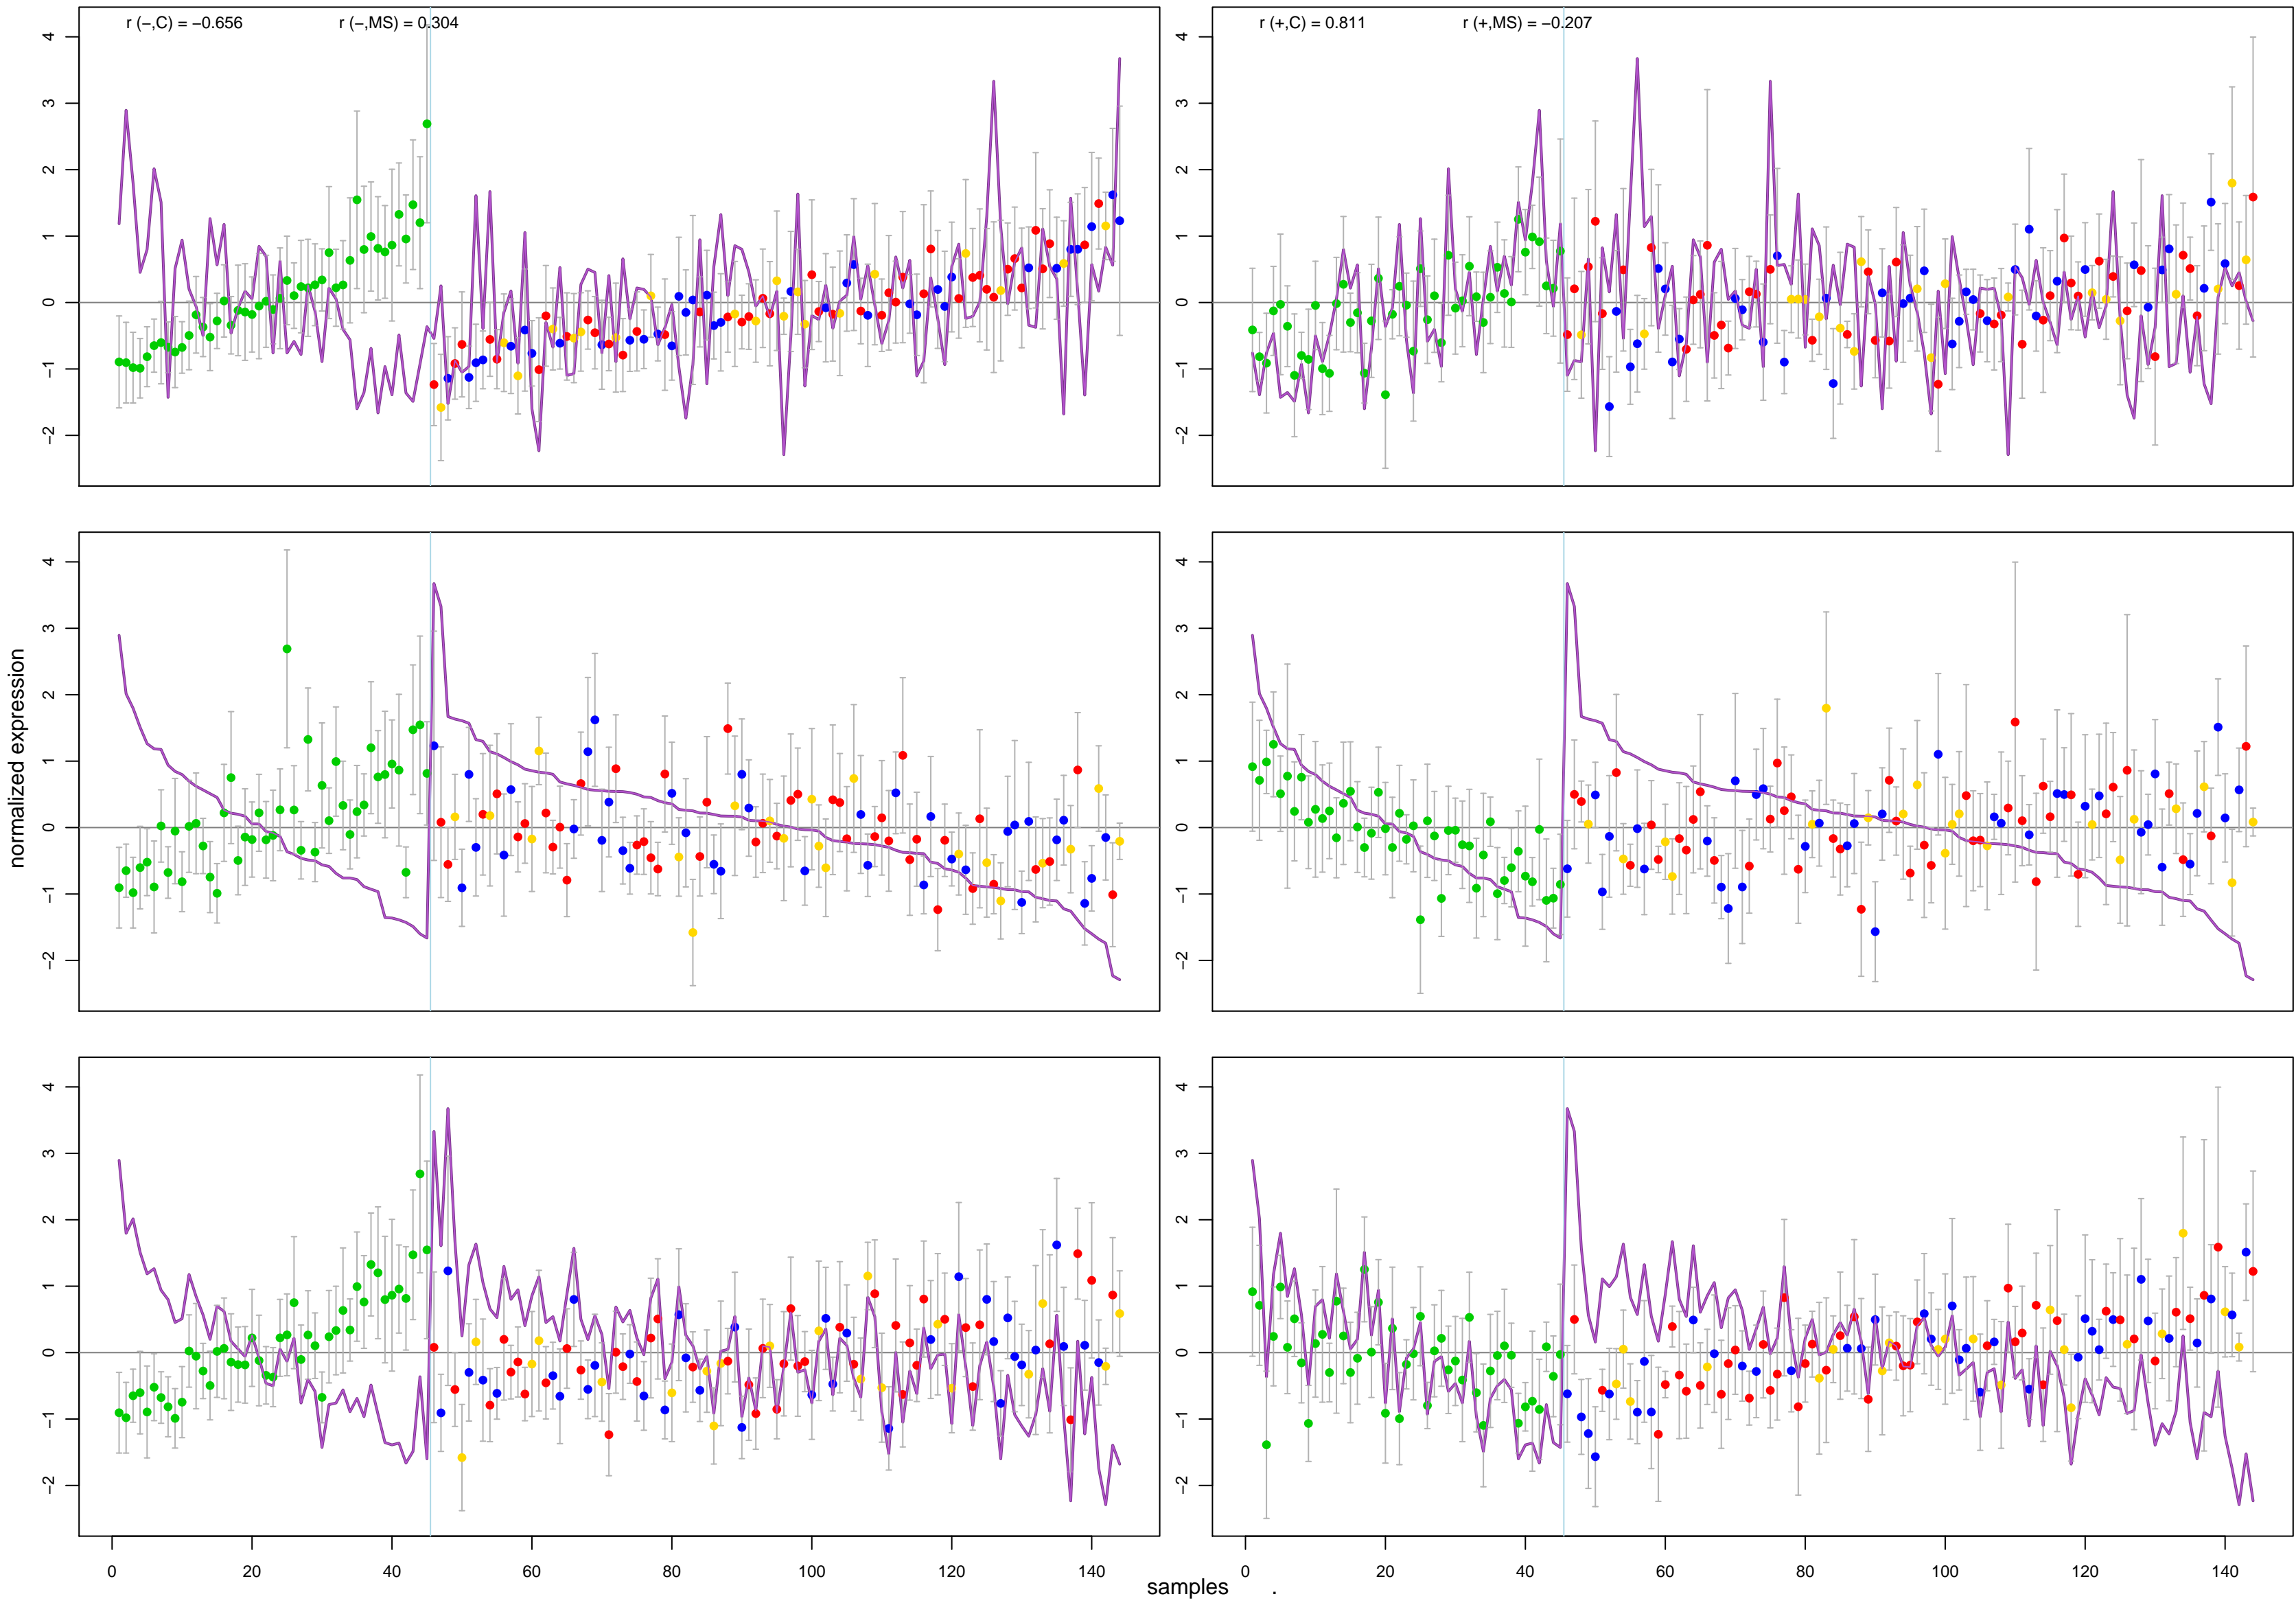

HS.413494

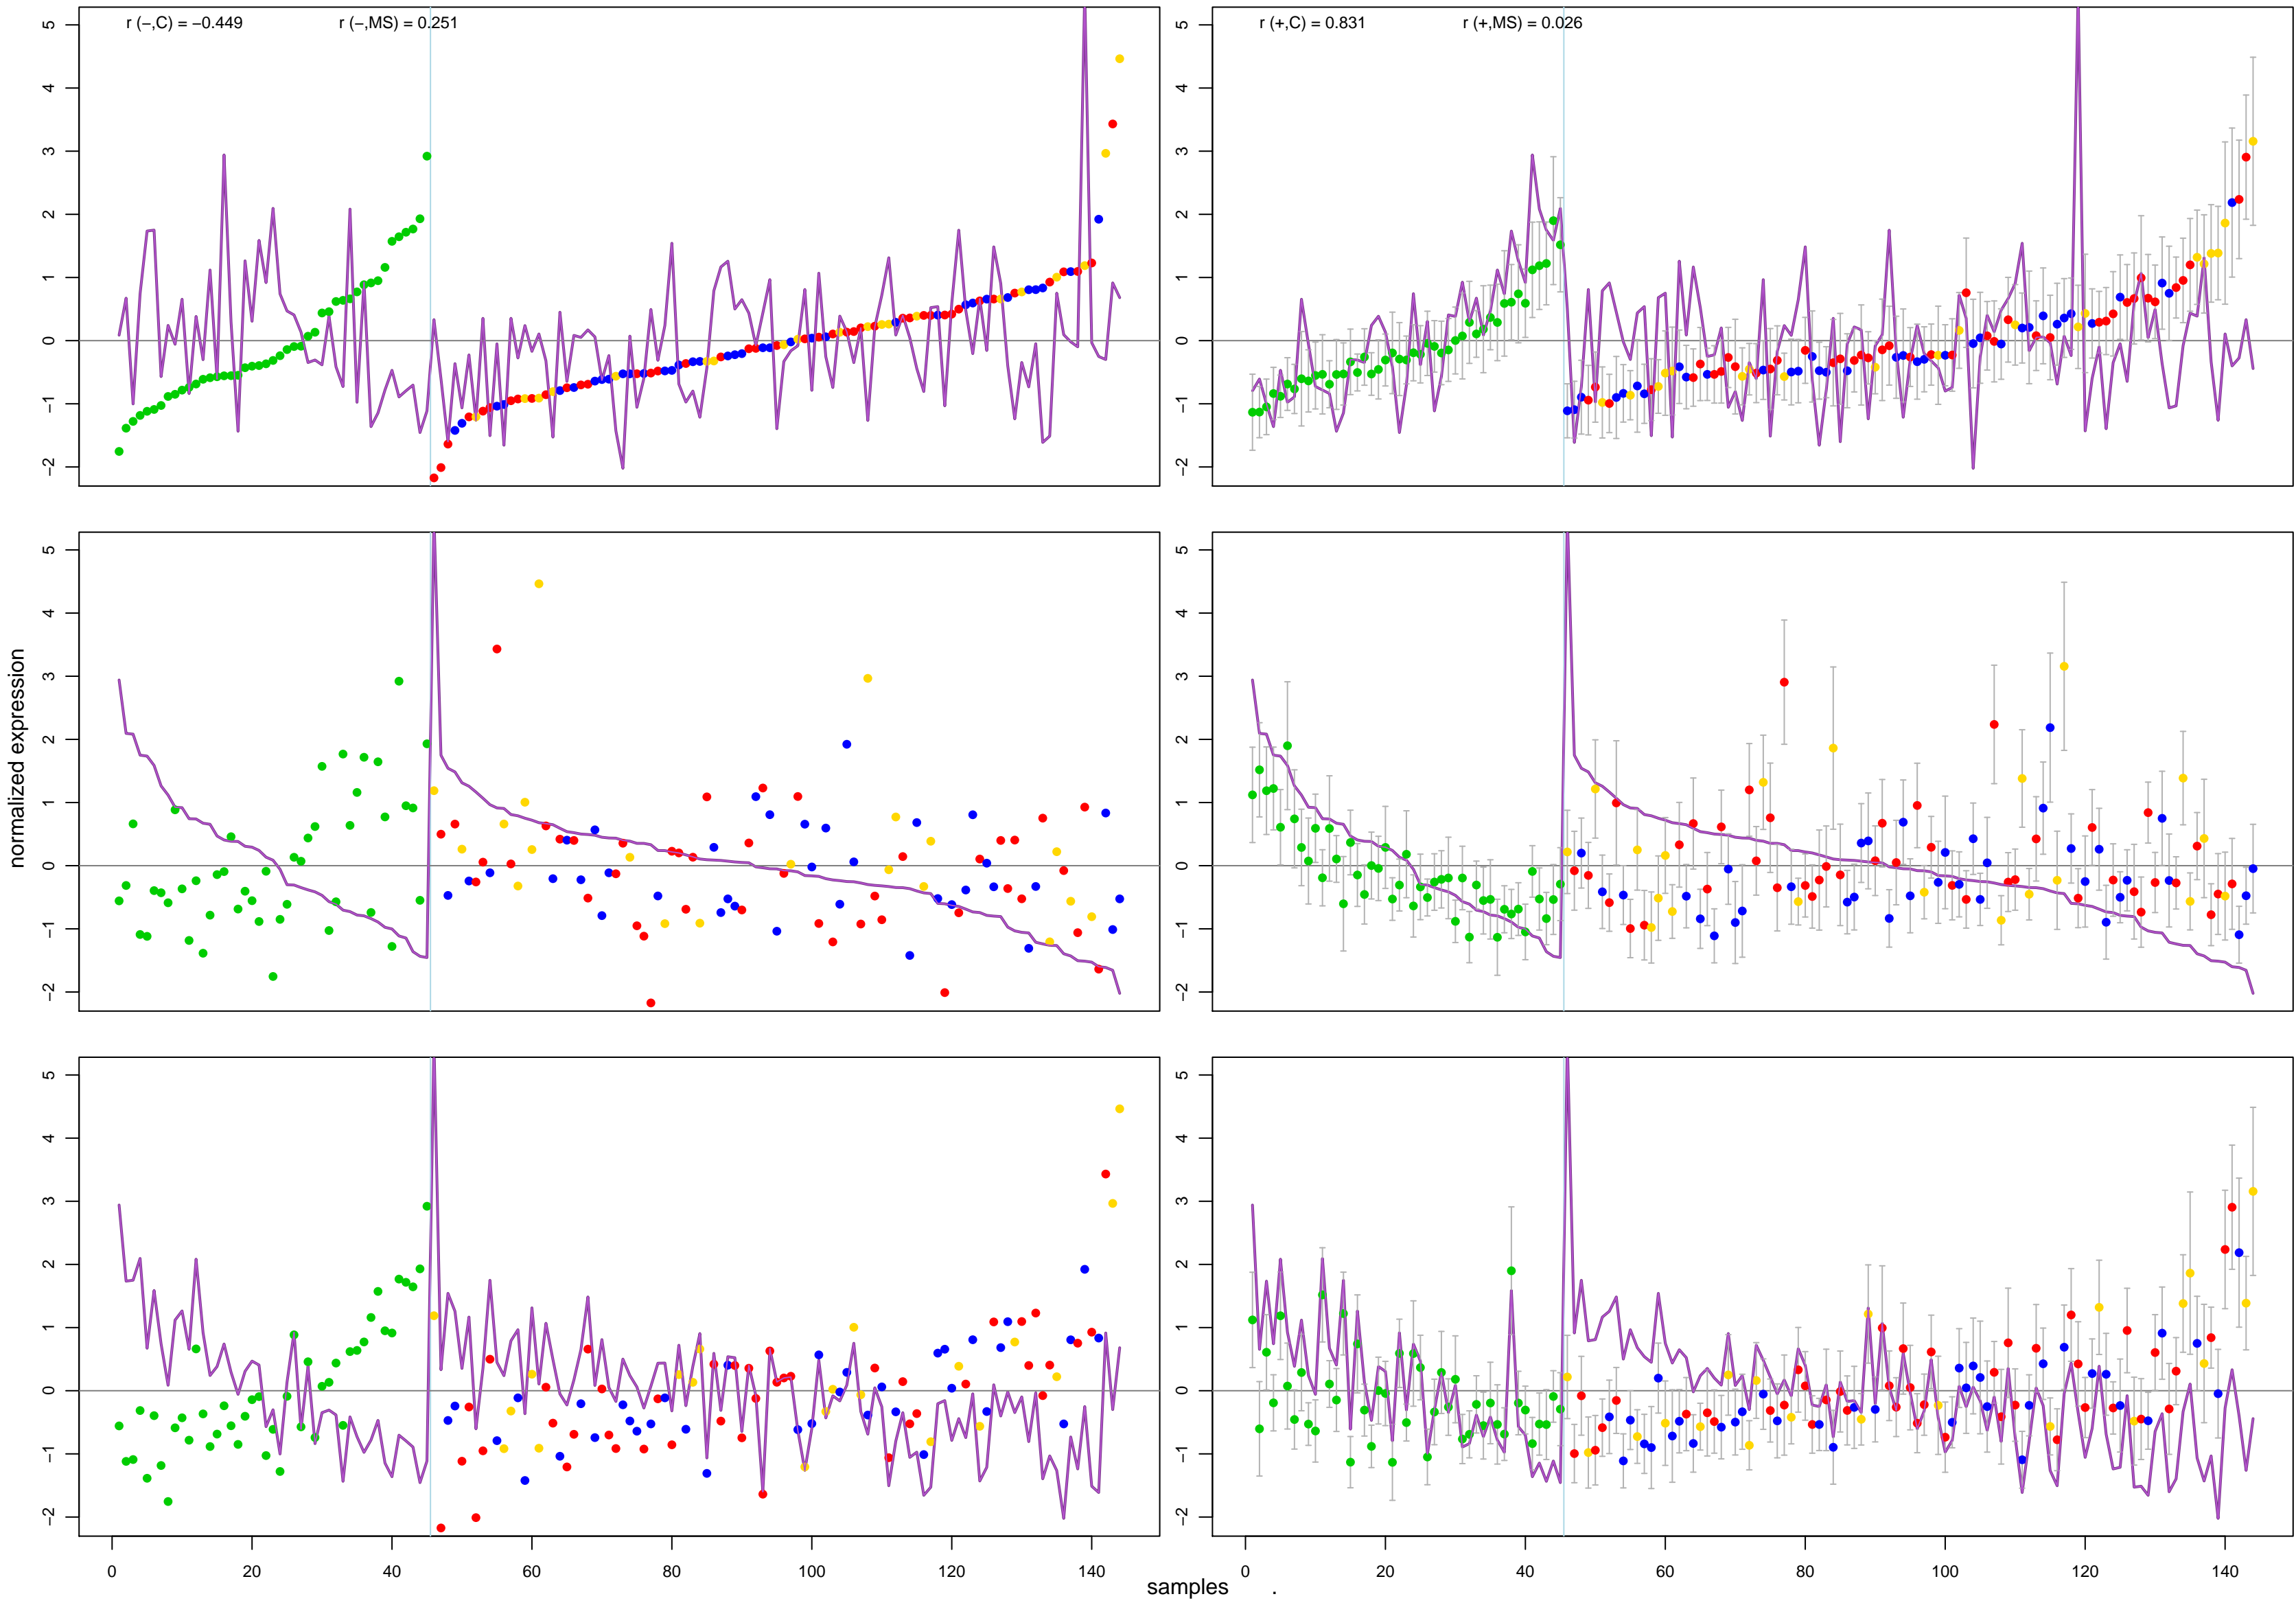

HS.443993

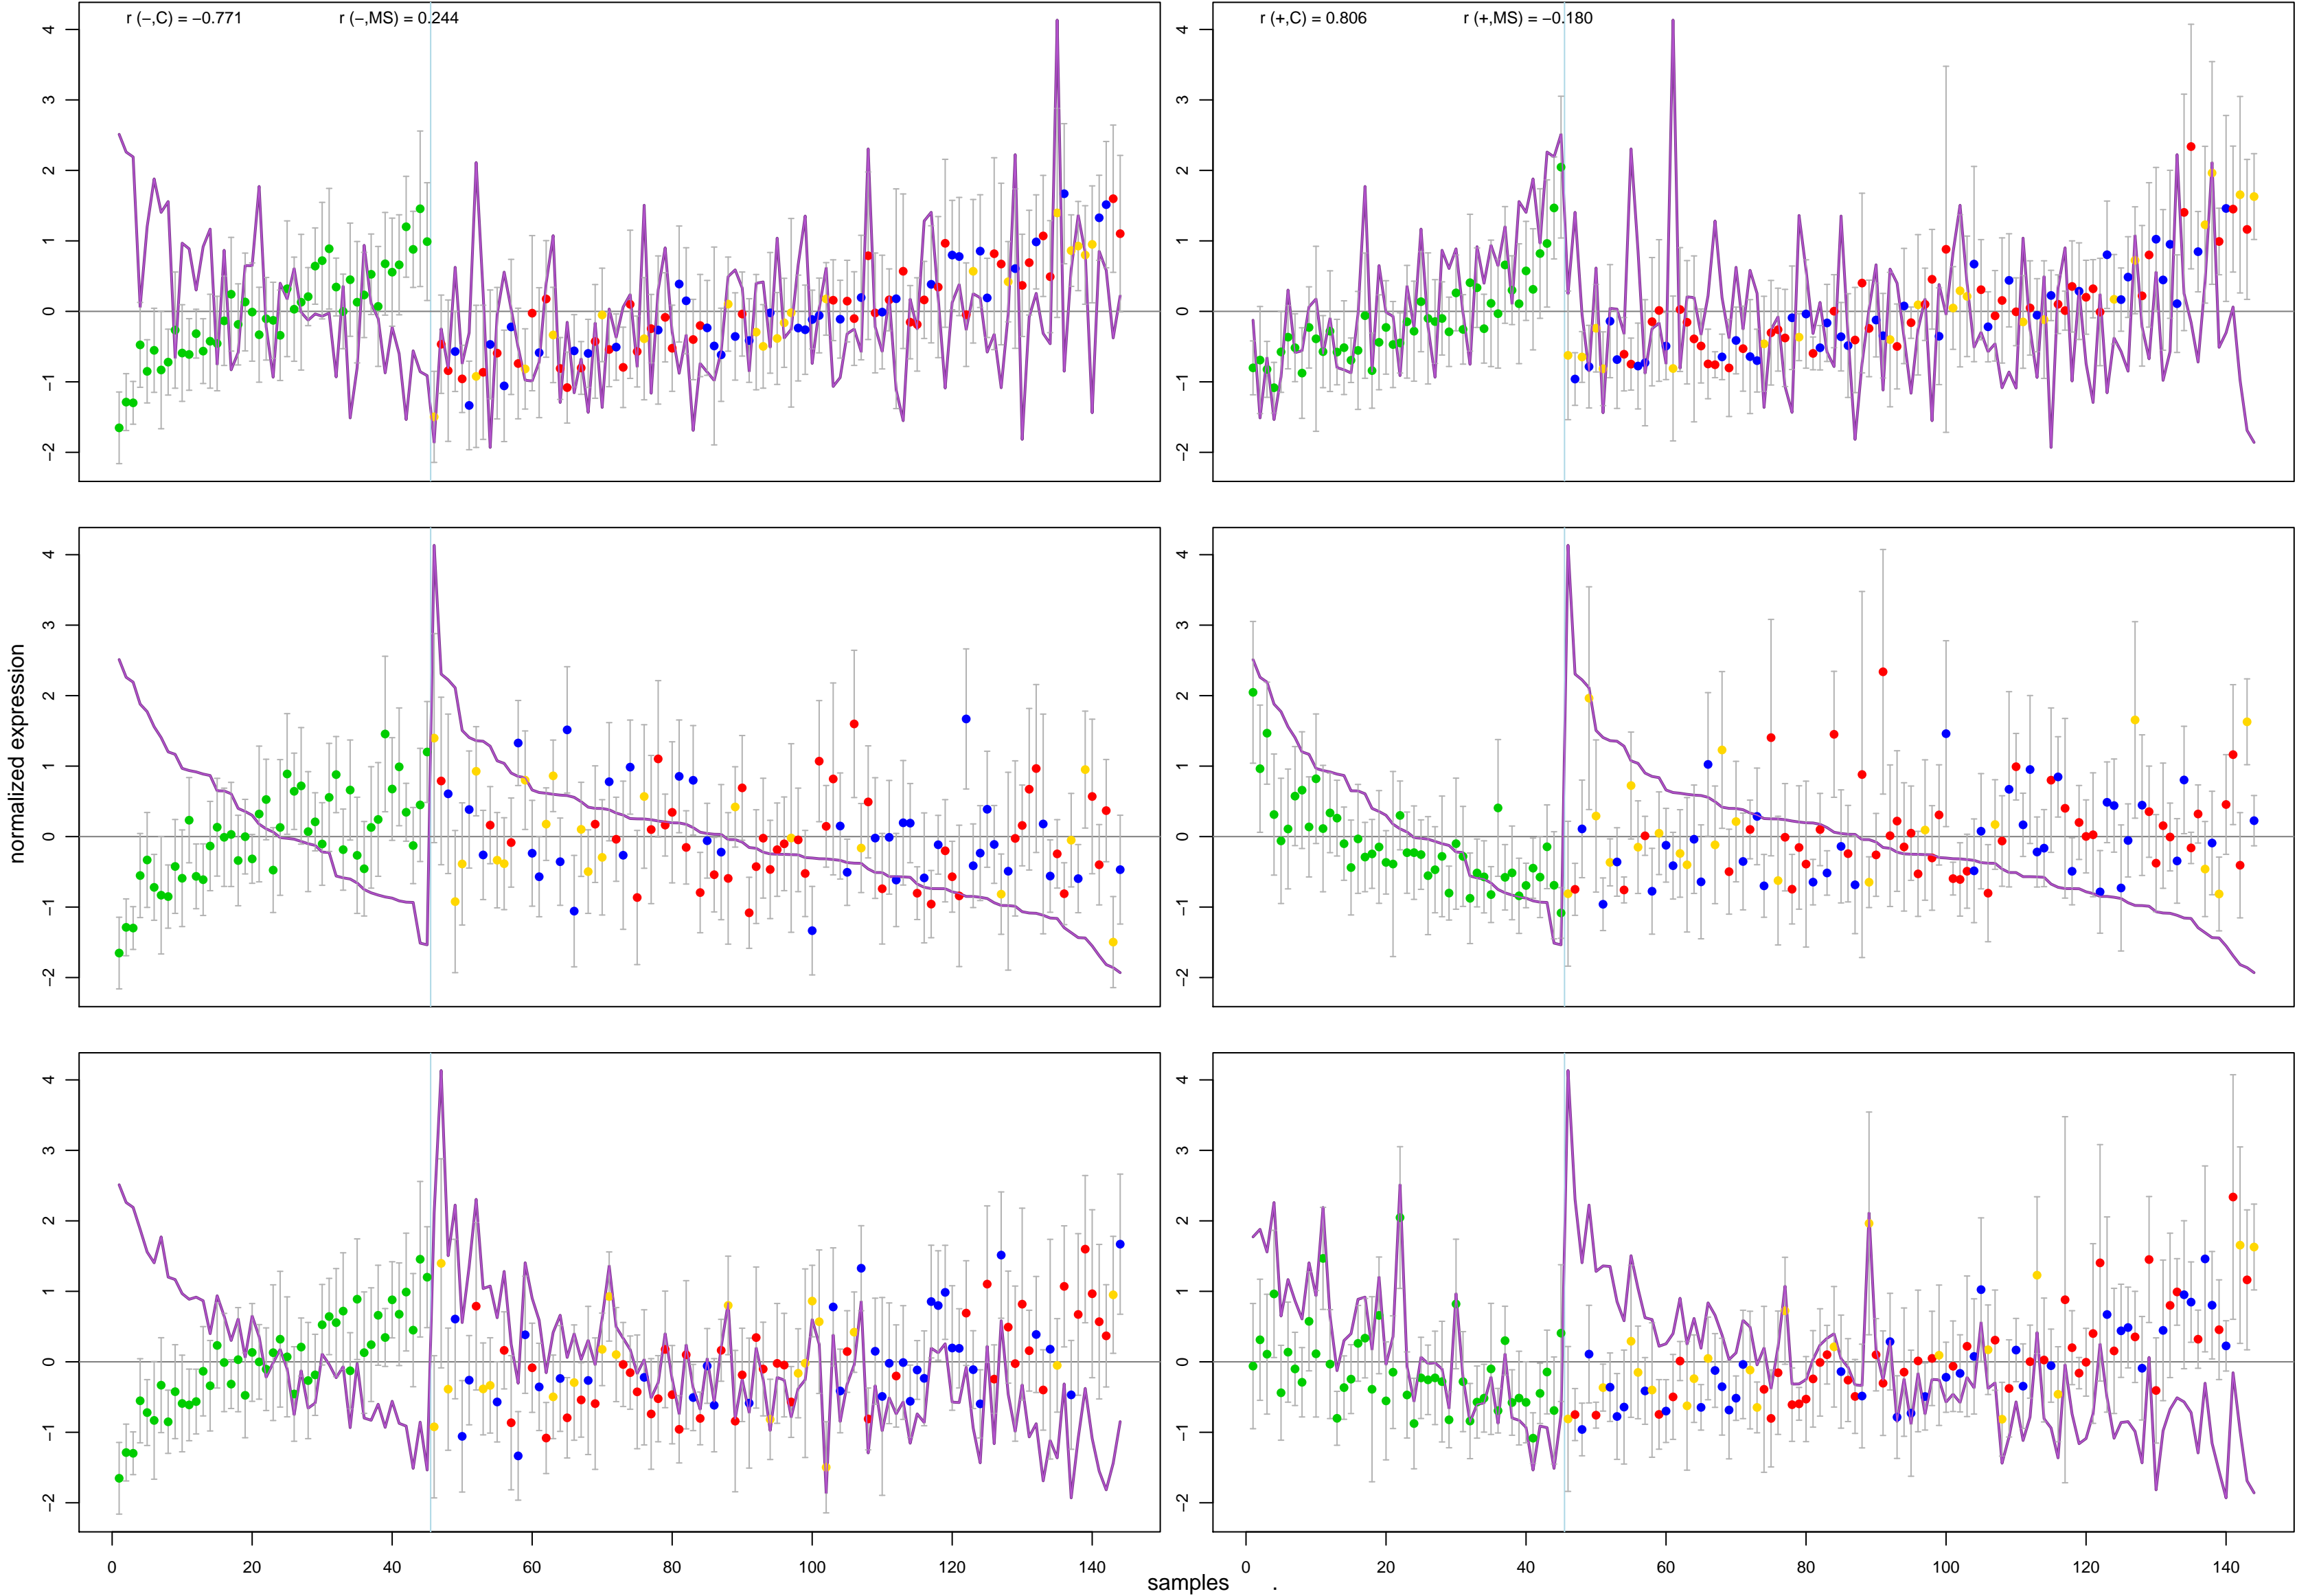



HS.495215 (TCRA)

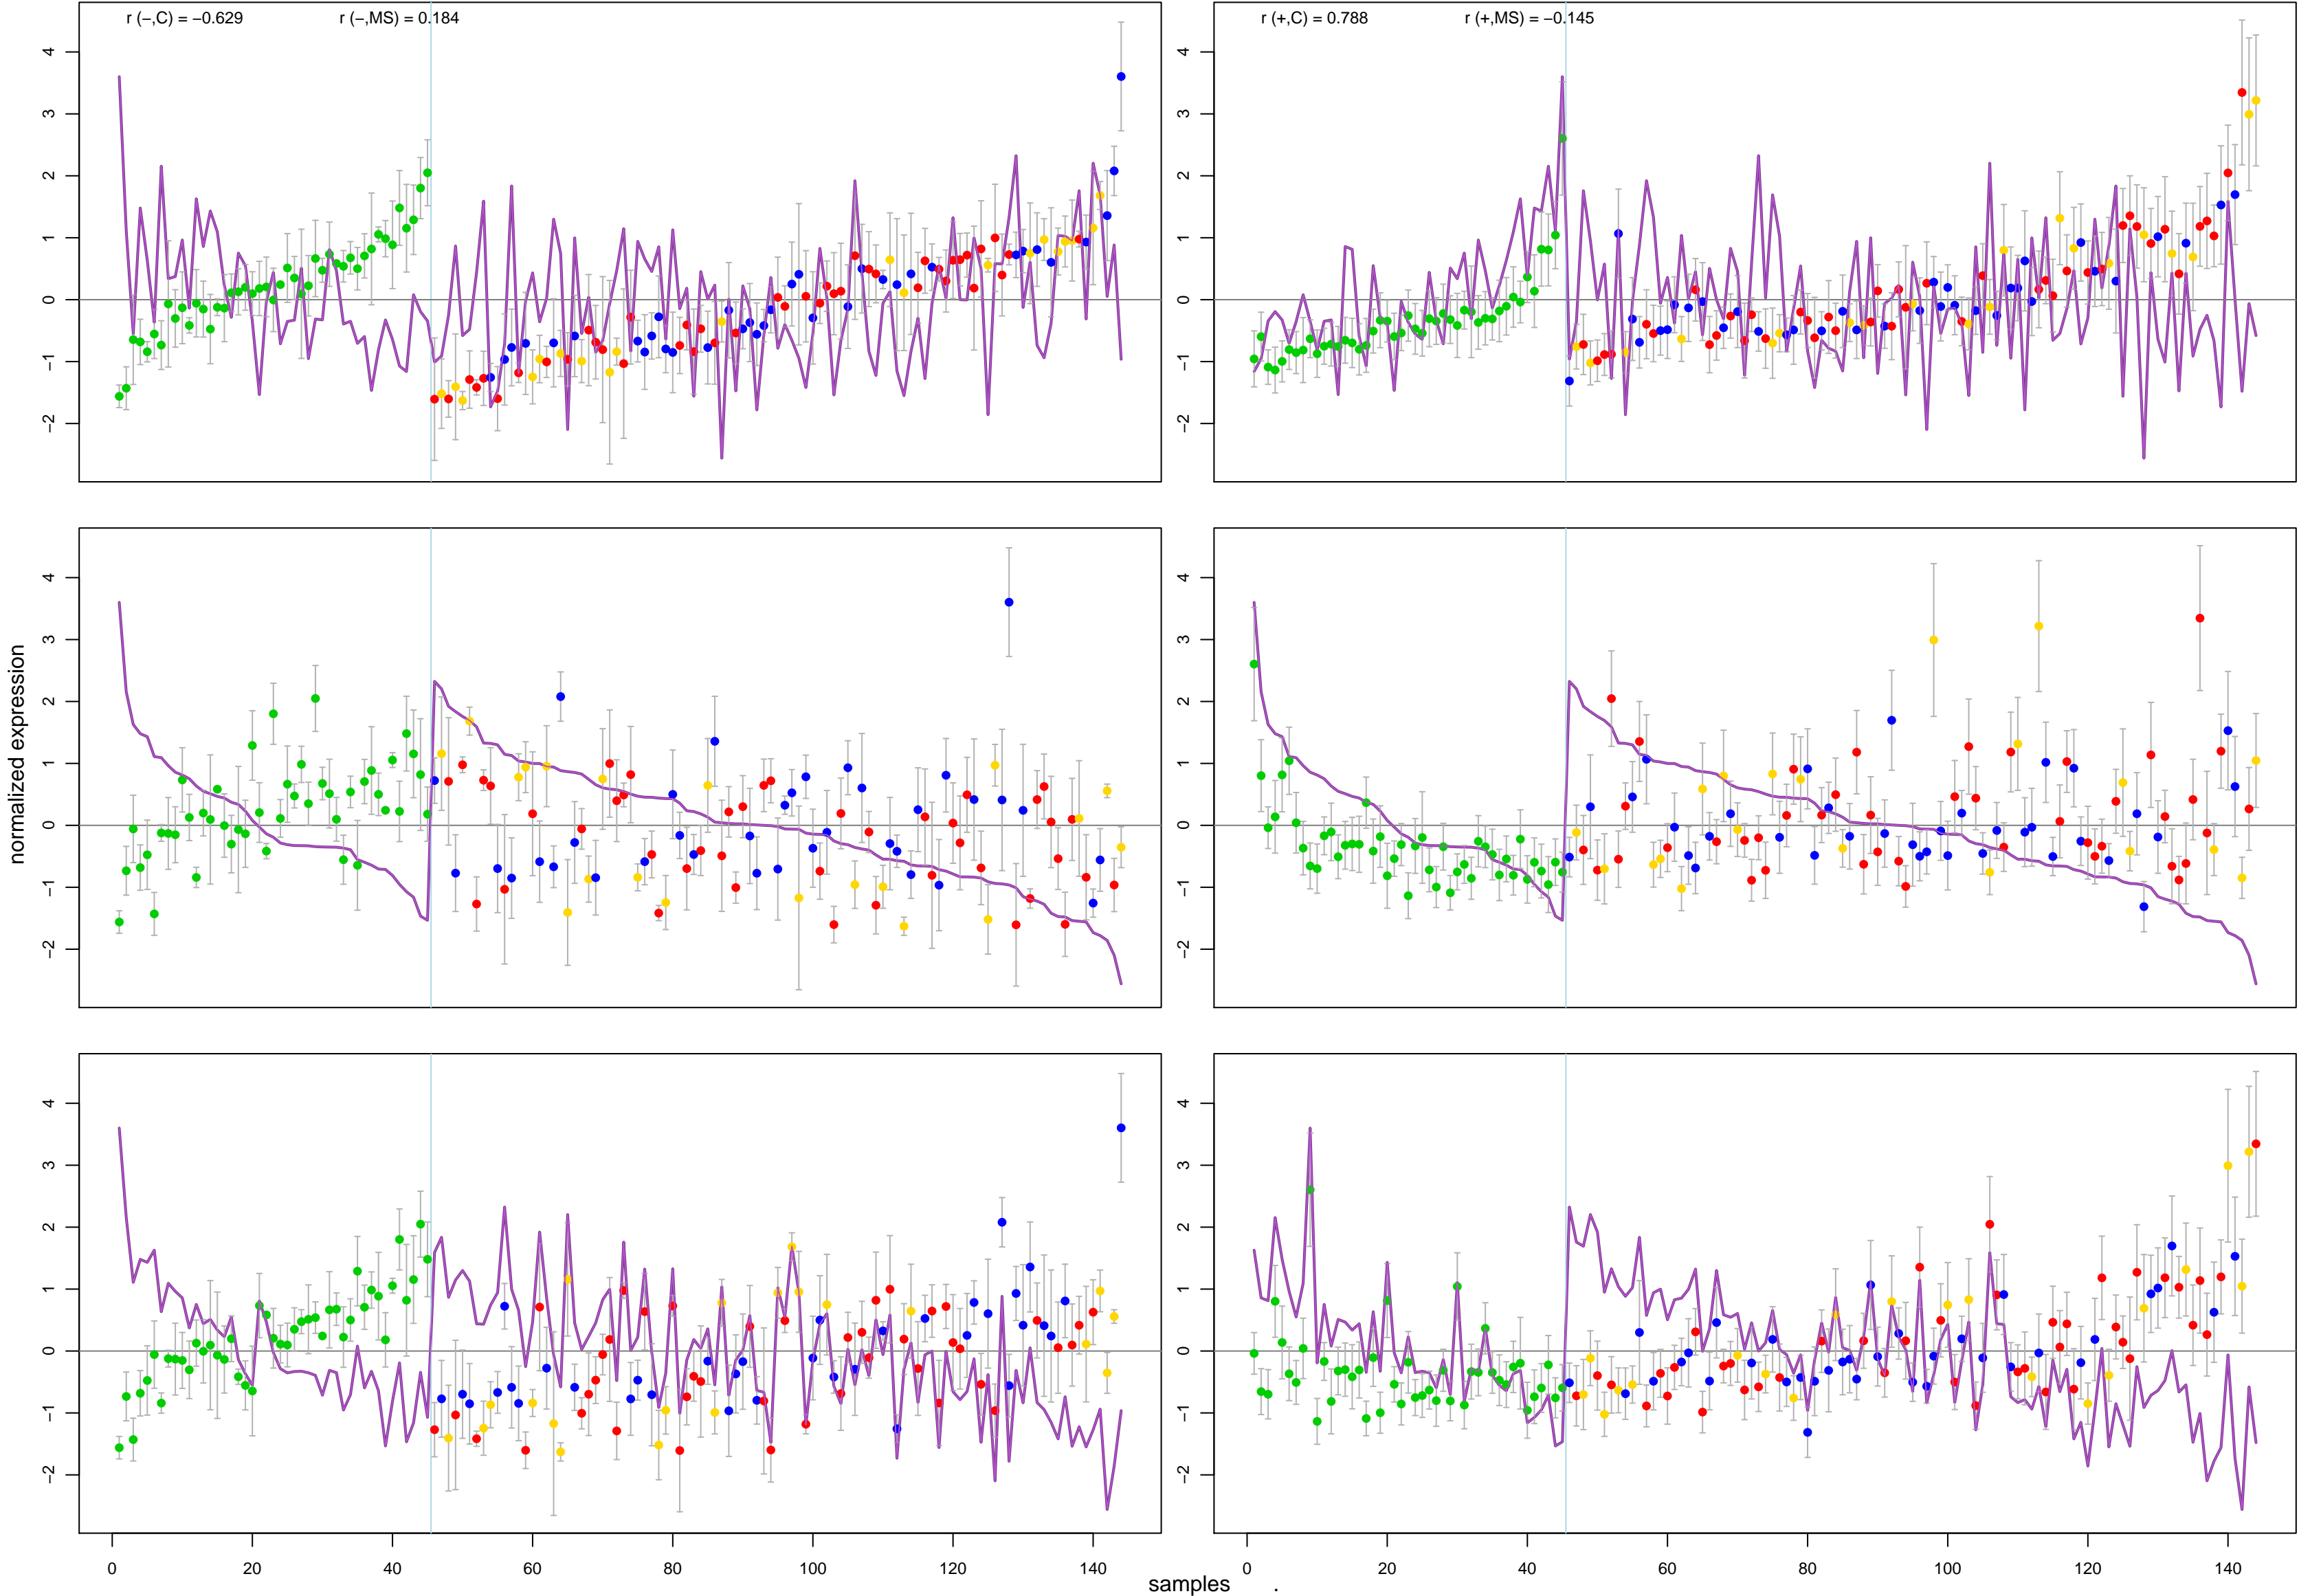

# HS.540667

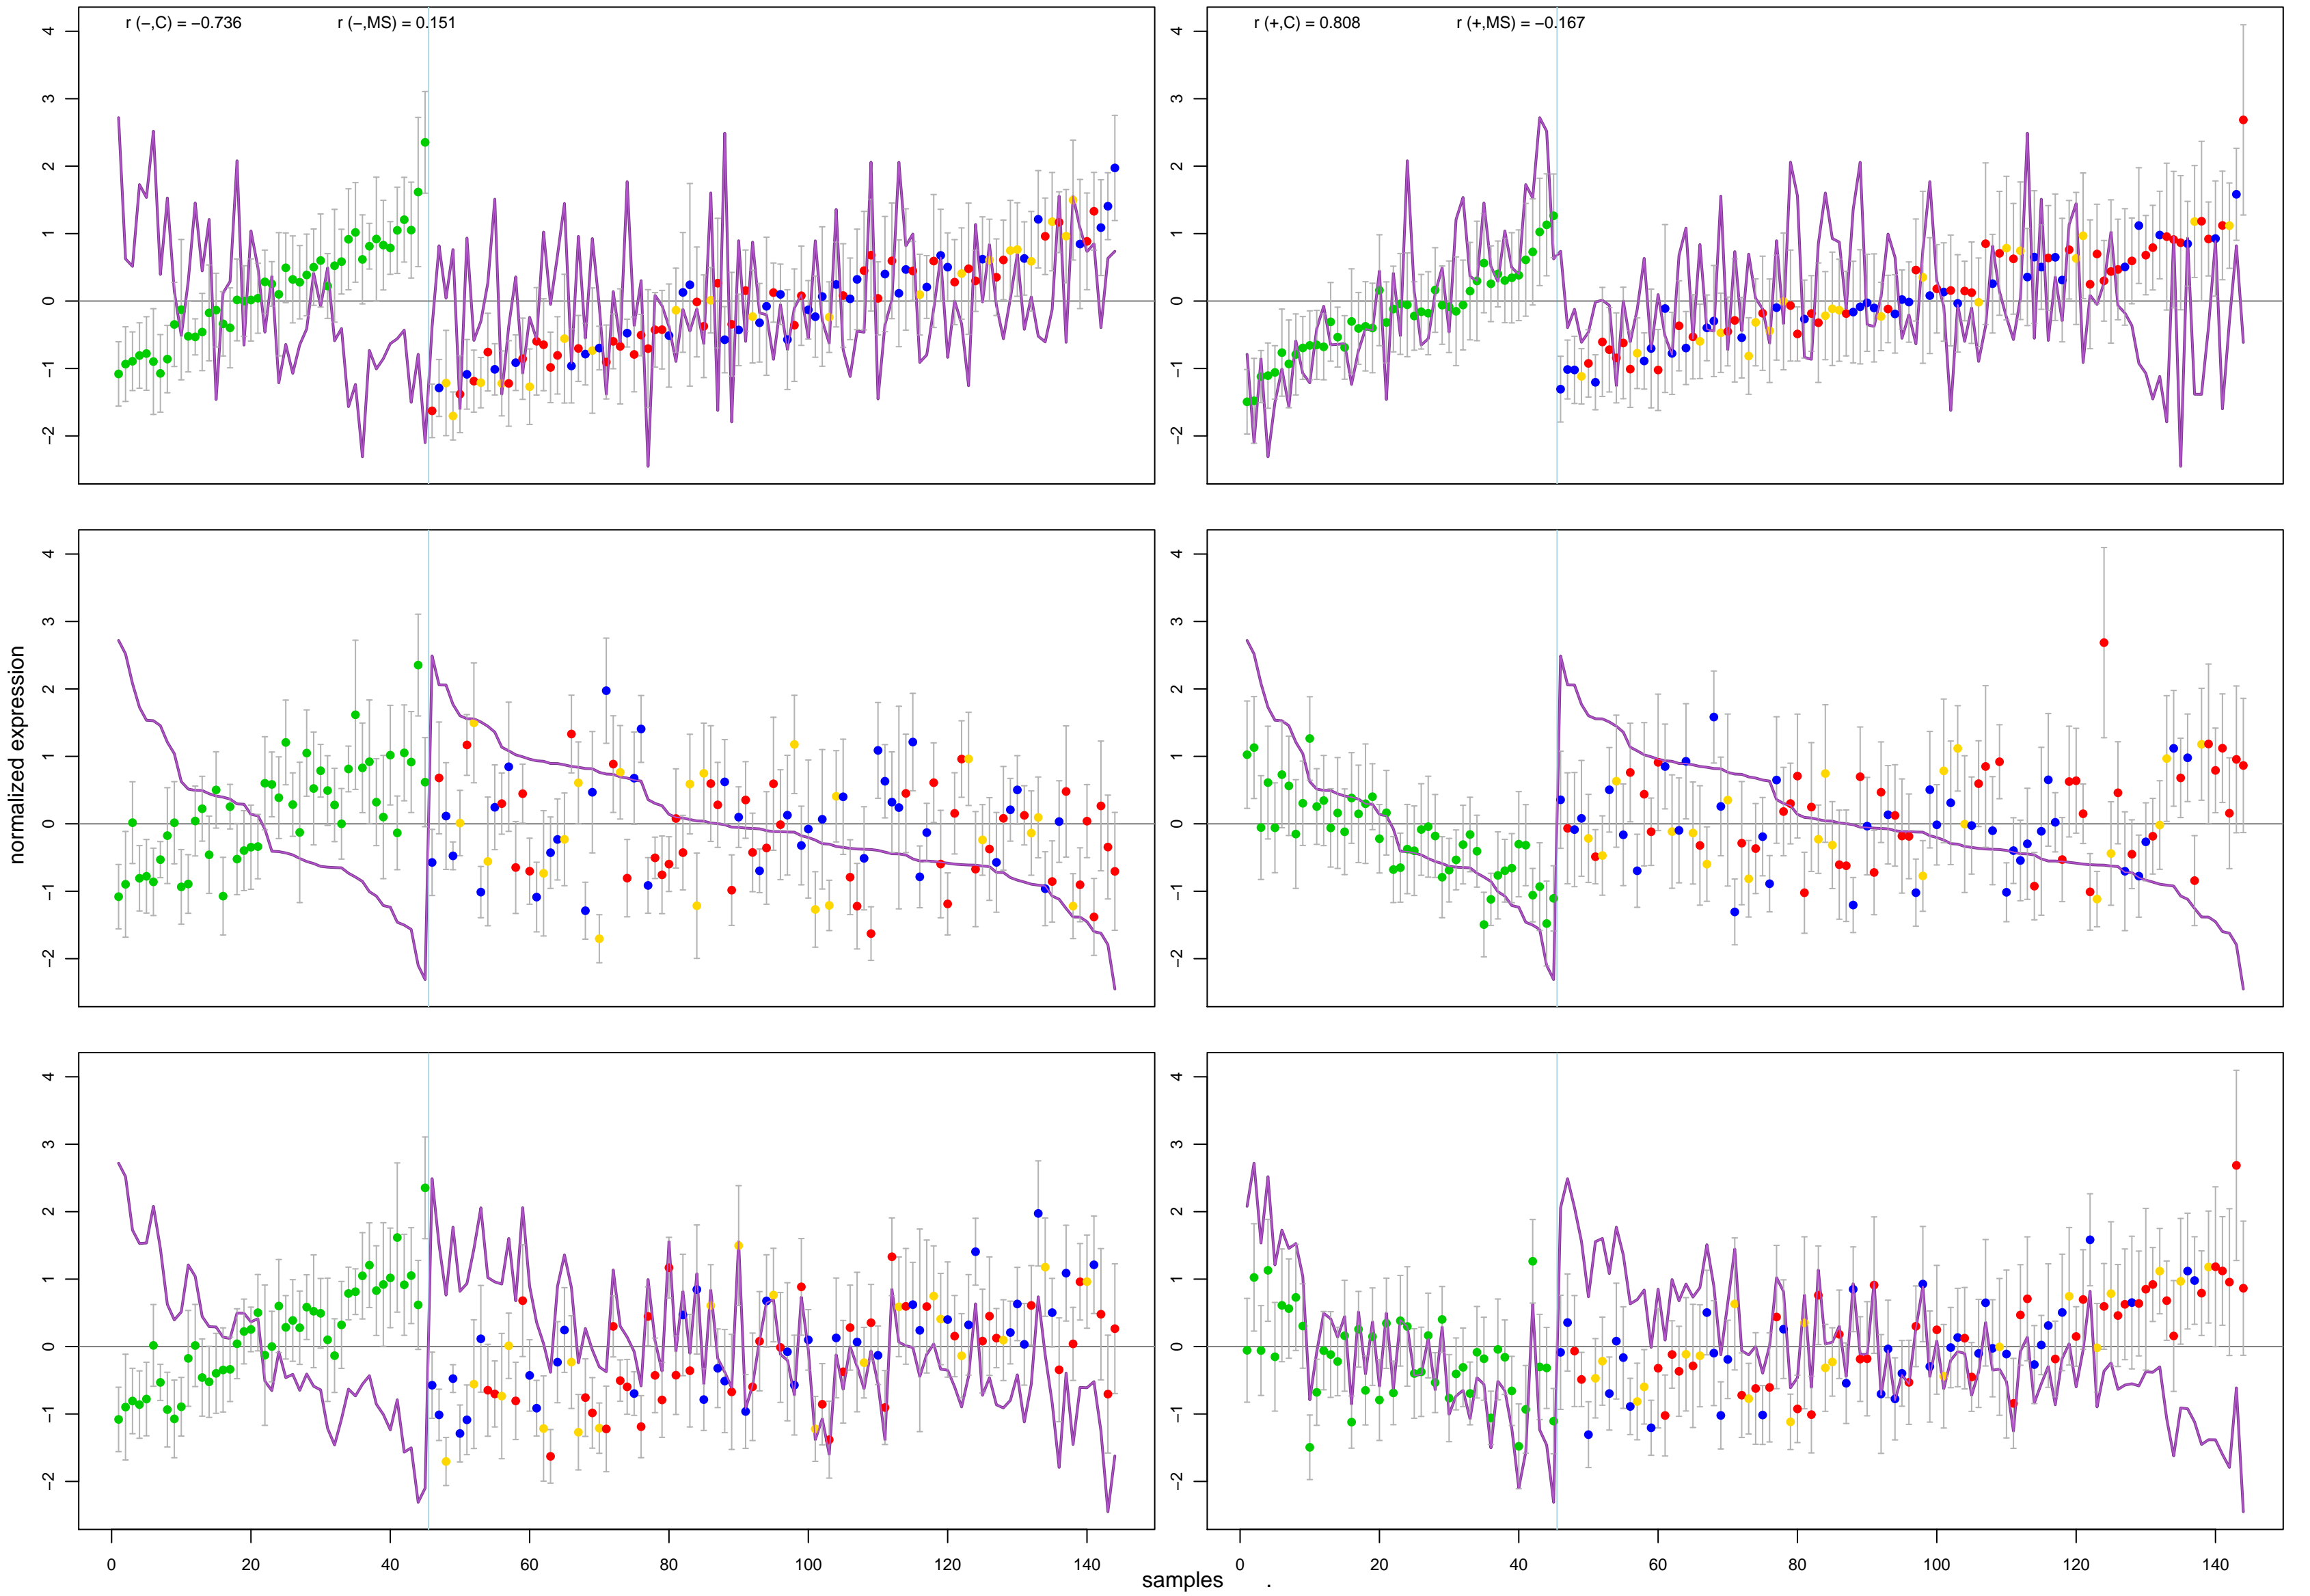

HS.541221

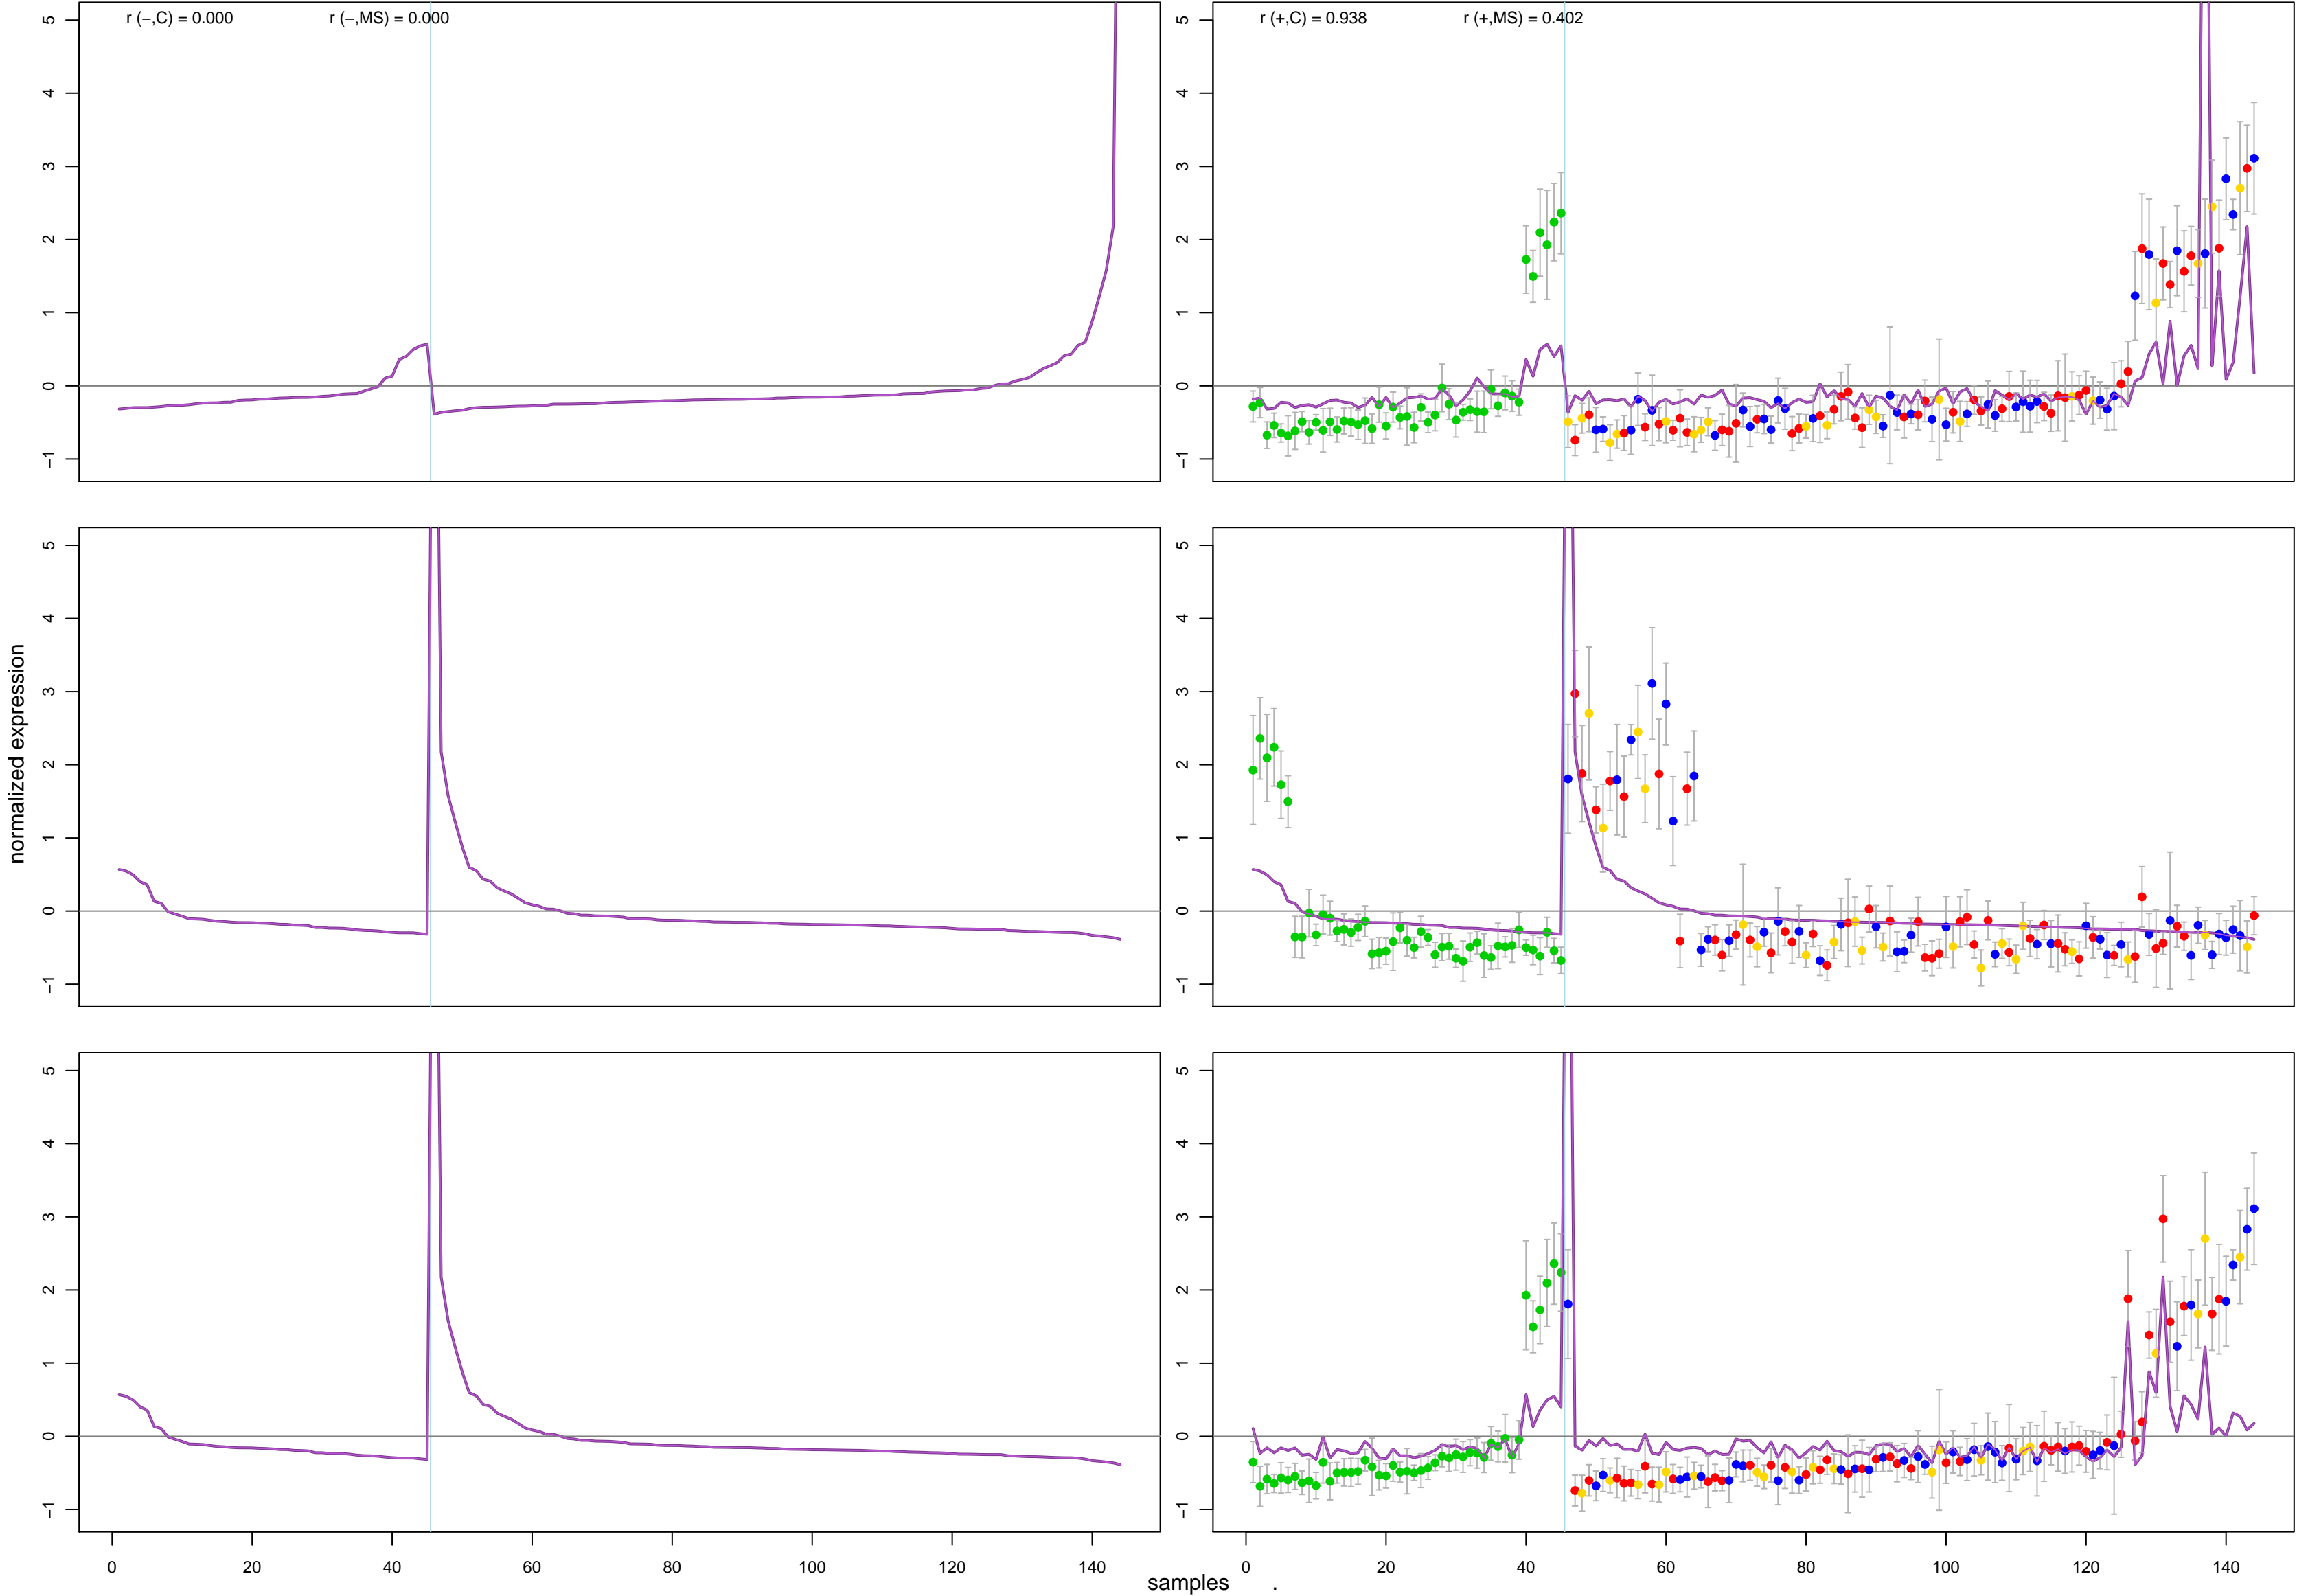

# HS.551825 (VCL)

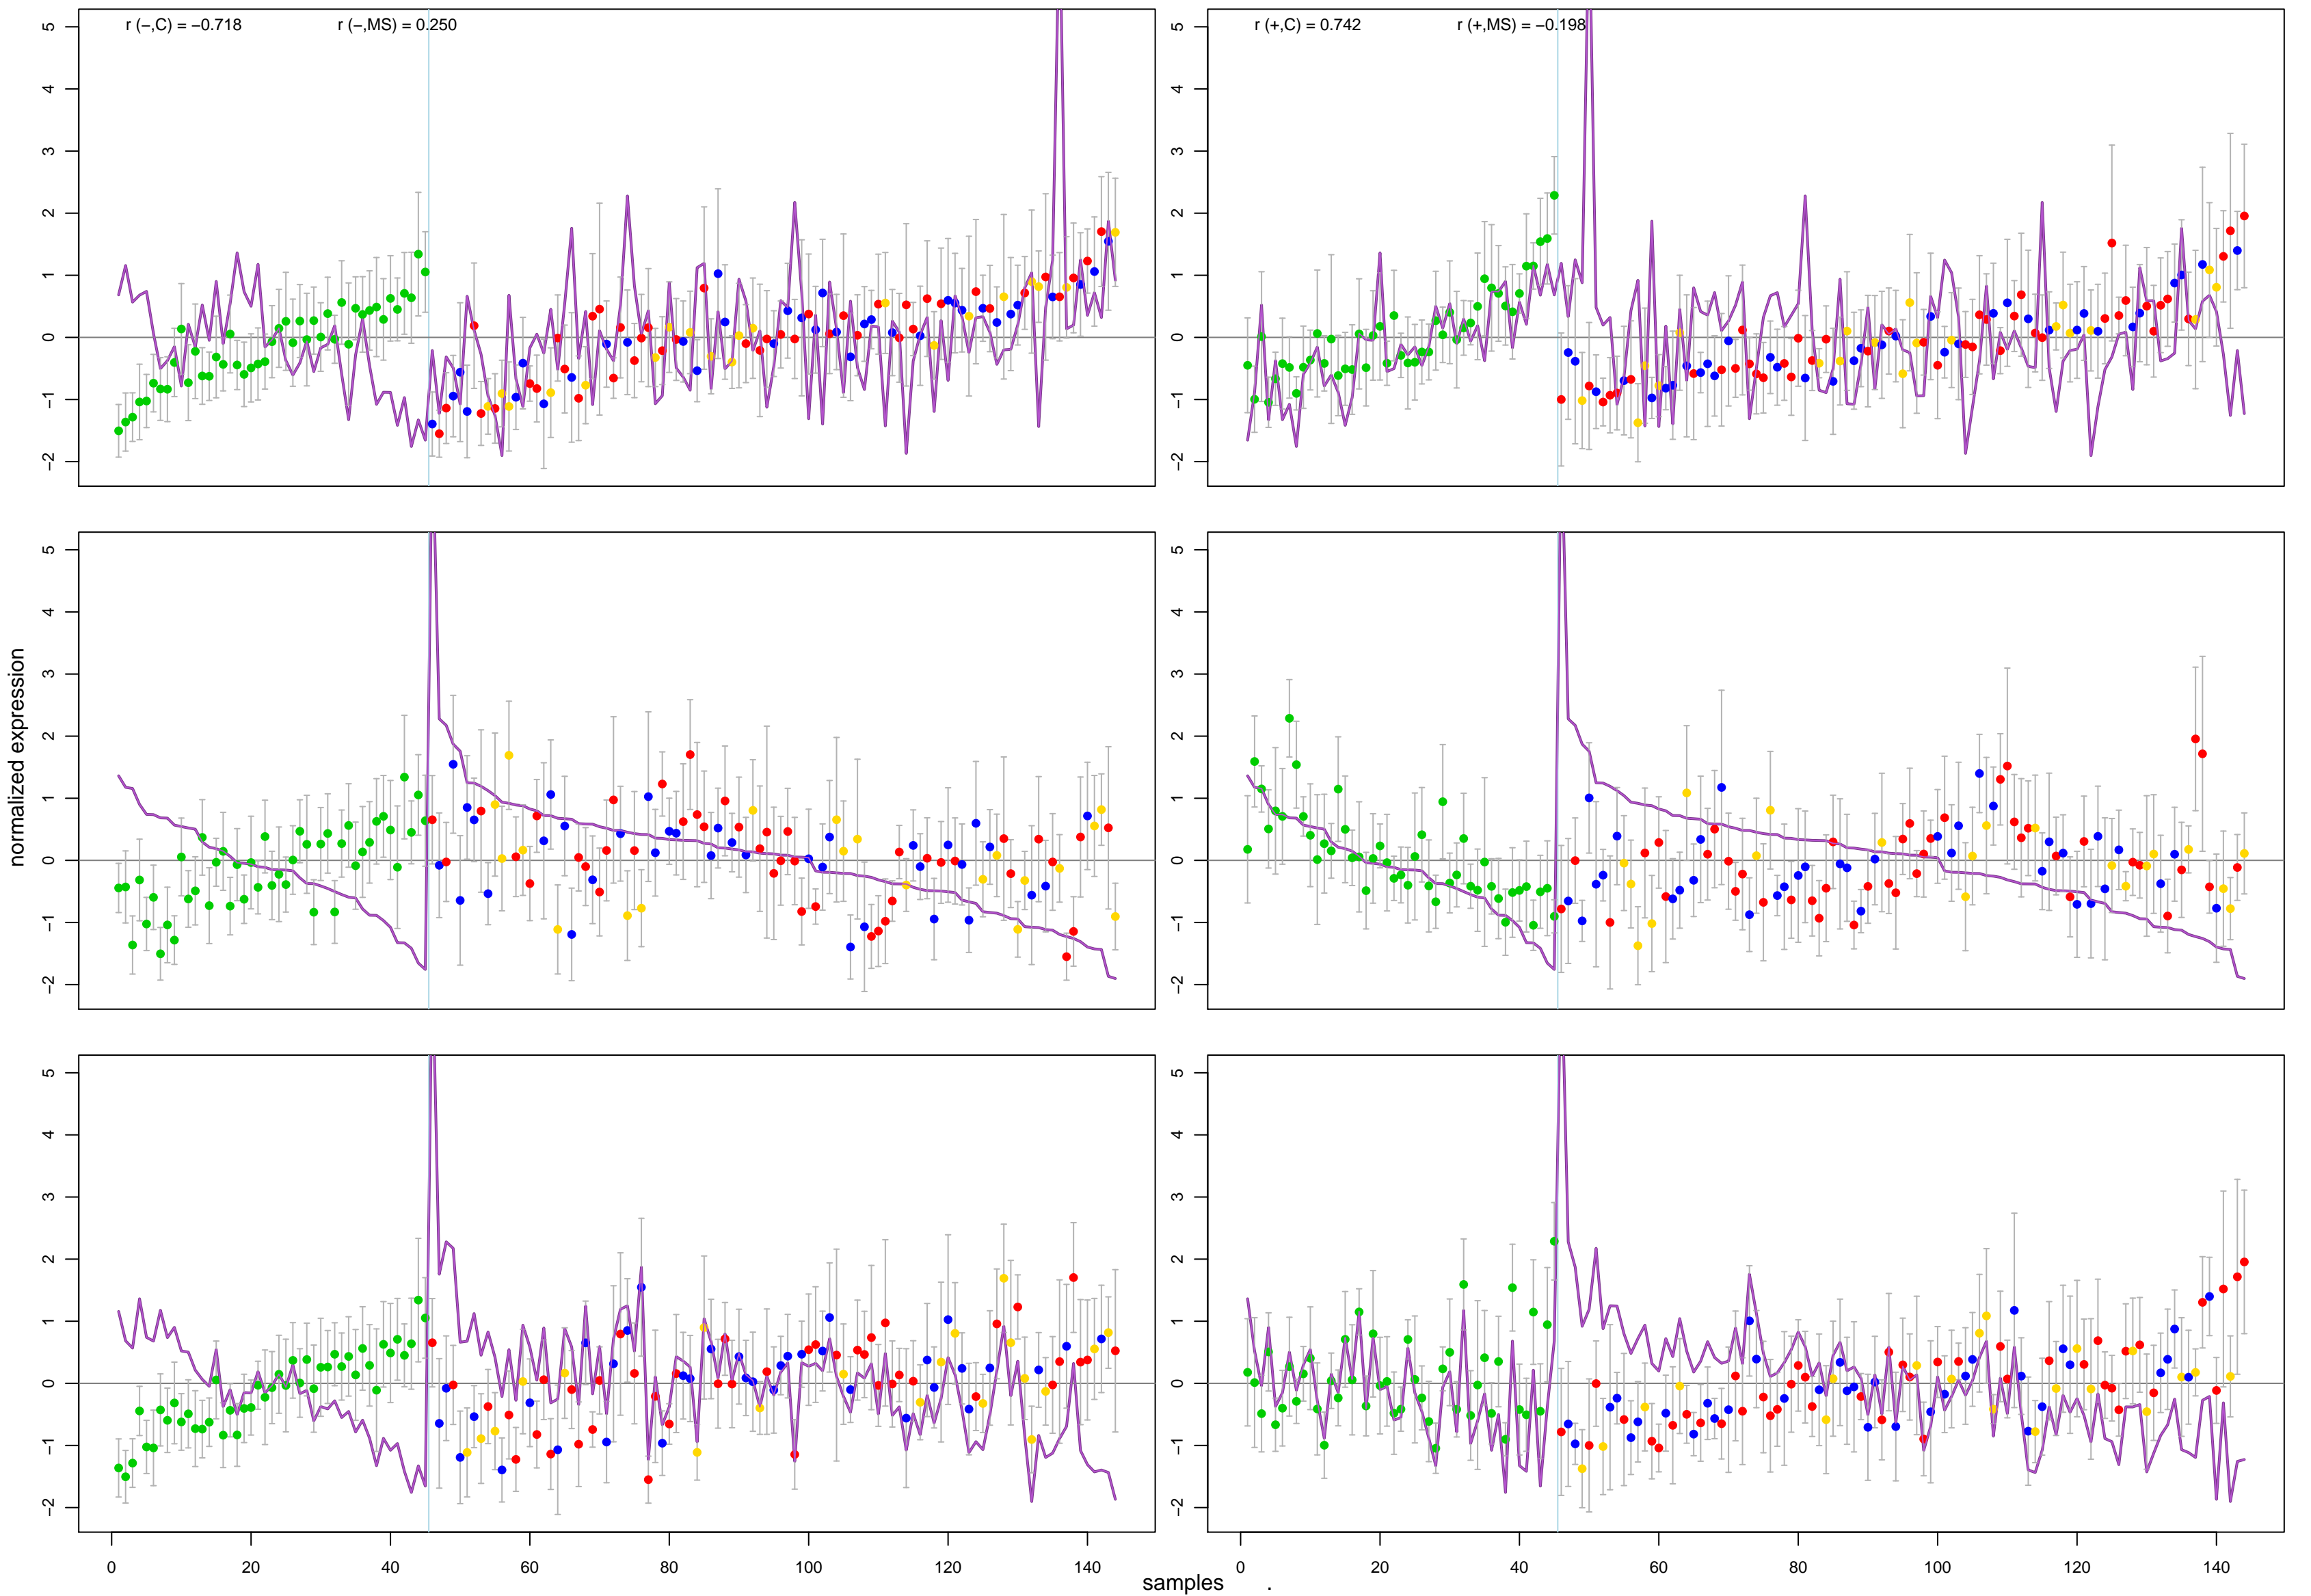



HS.571125

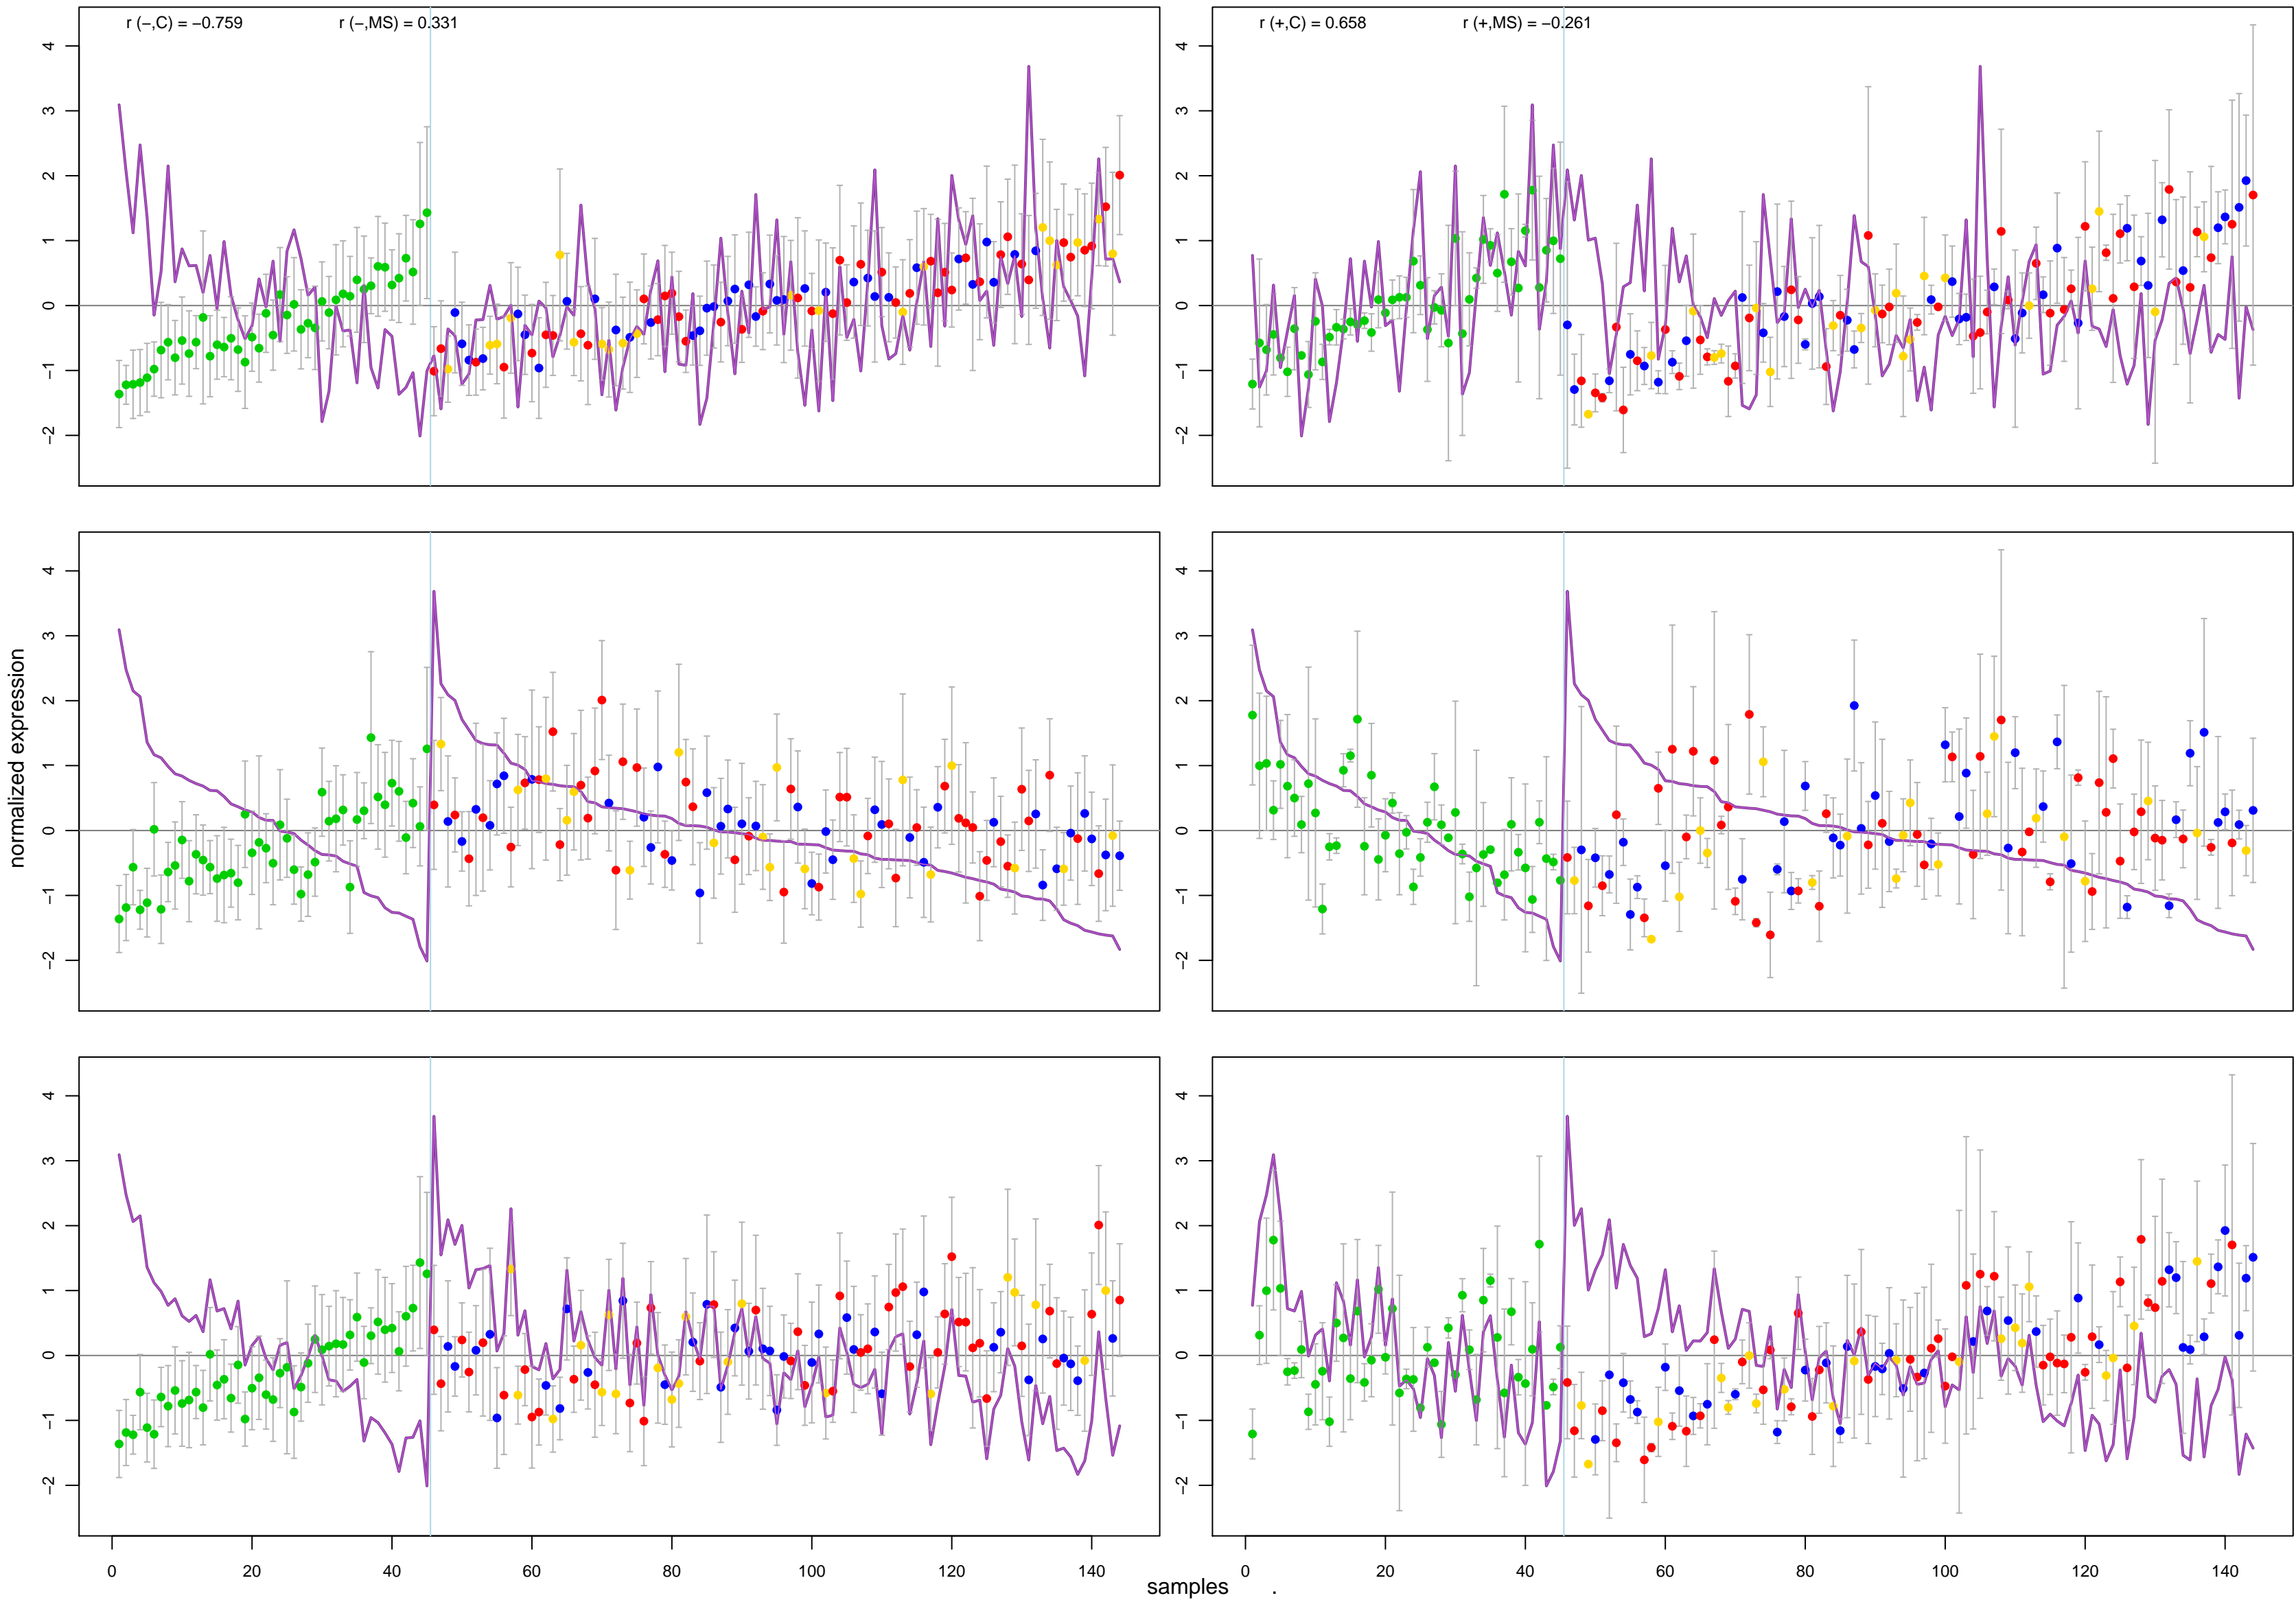

HS.574542 (ALG8)

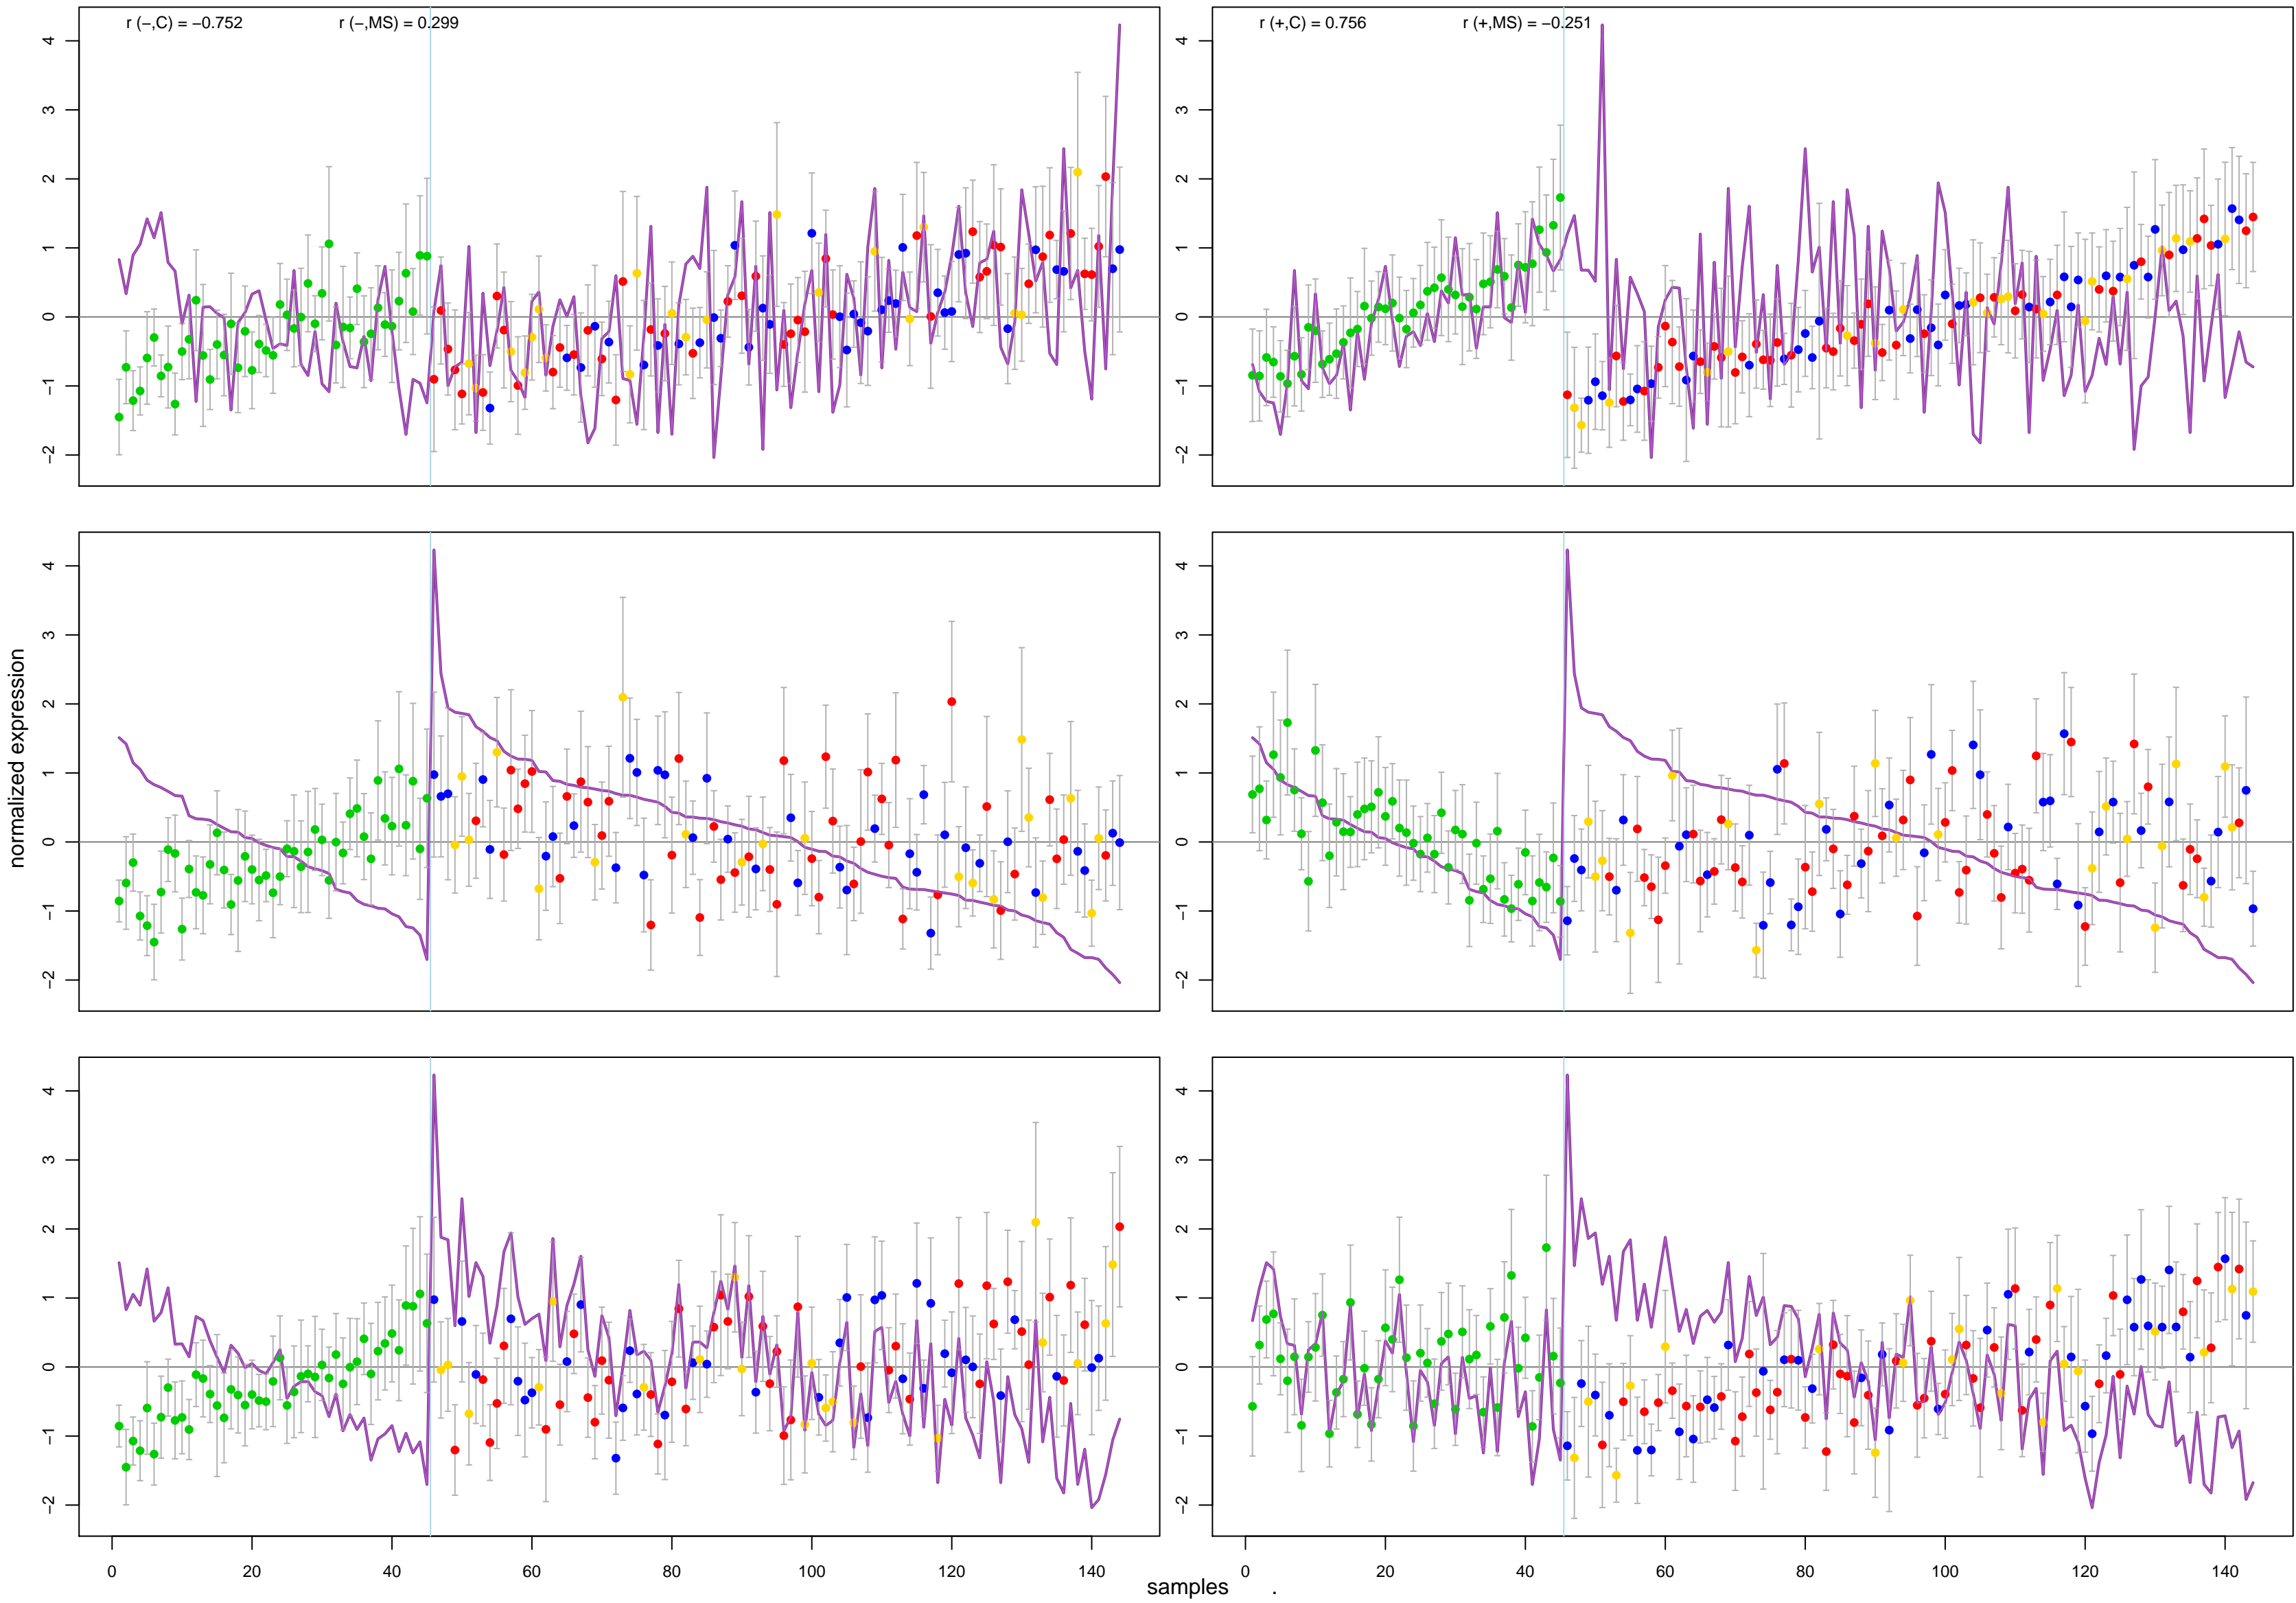

# INSR

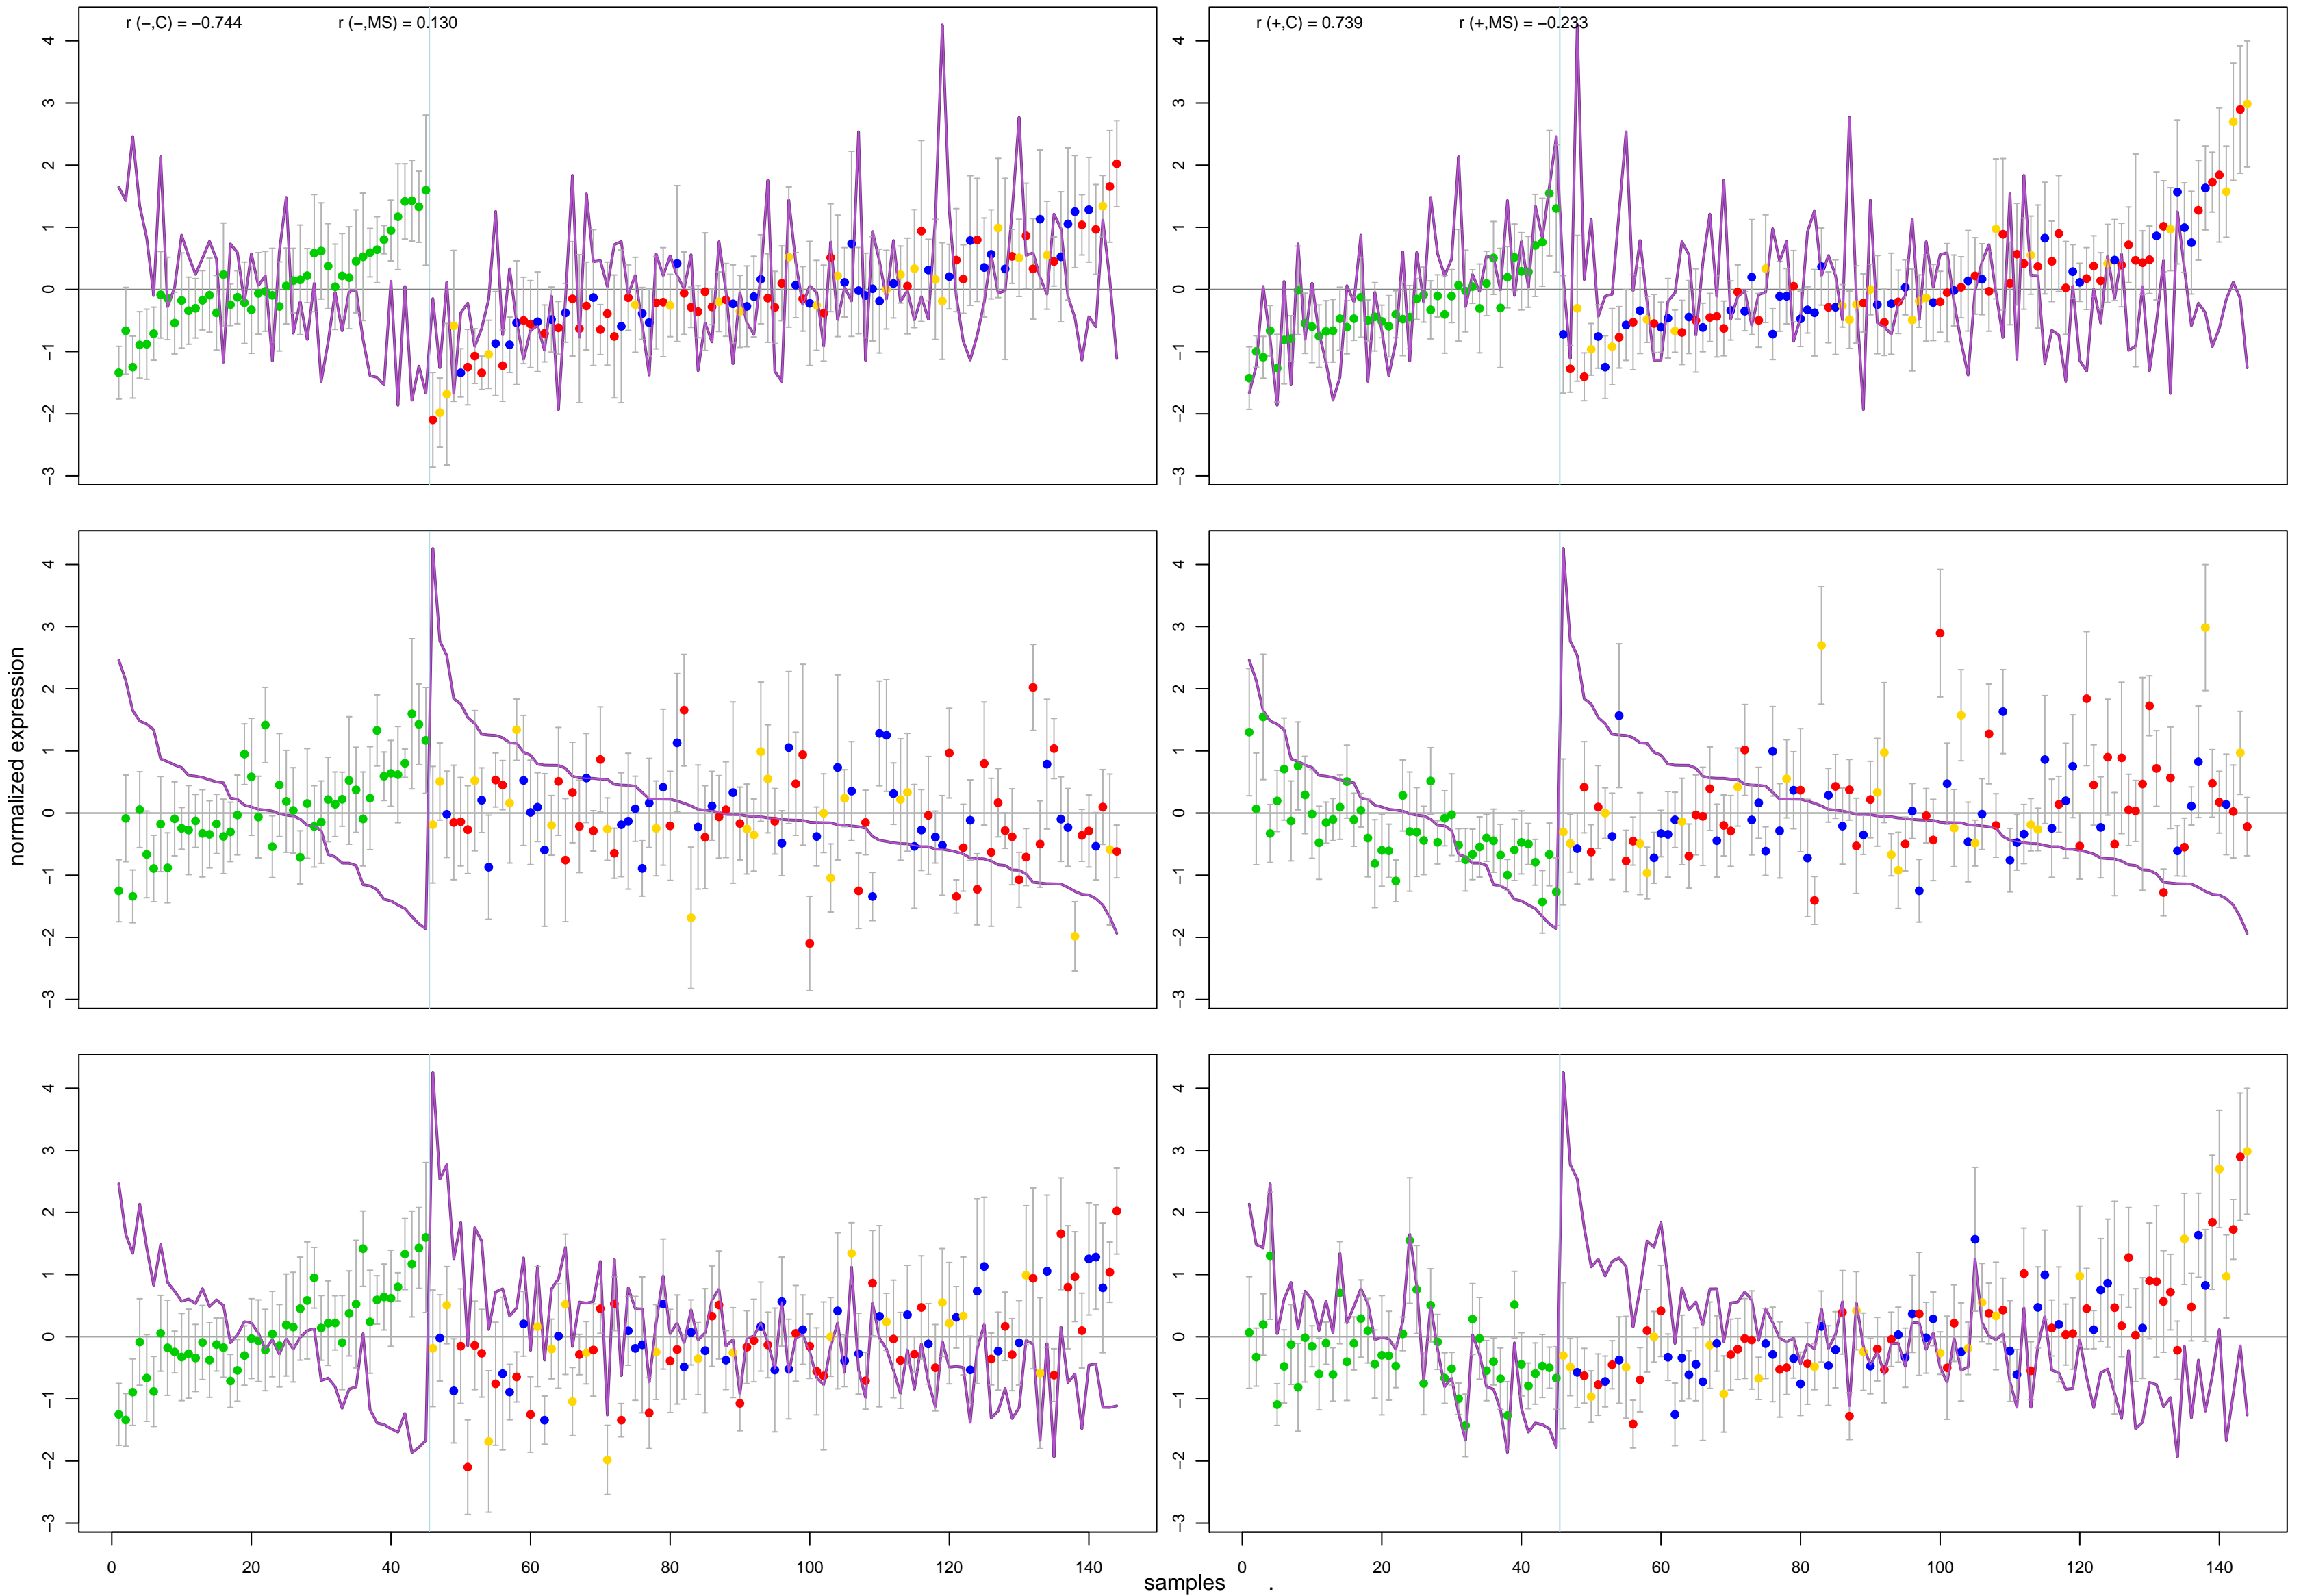

# IRAK3

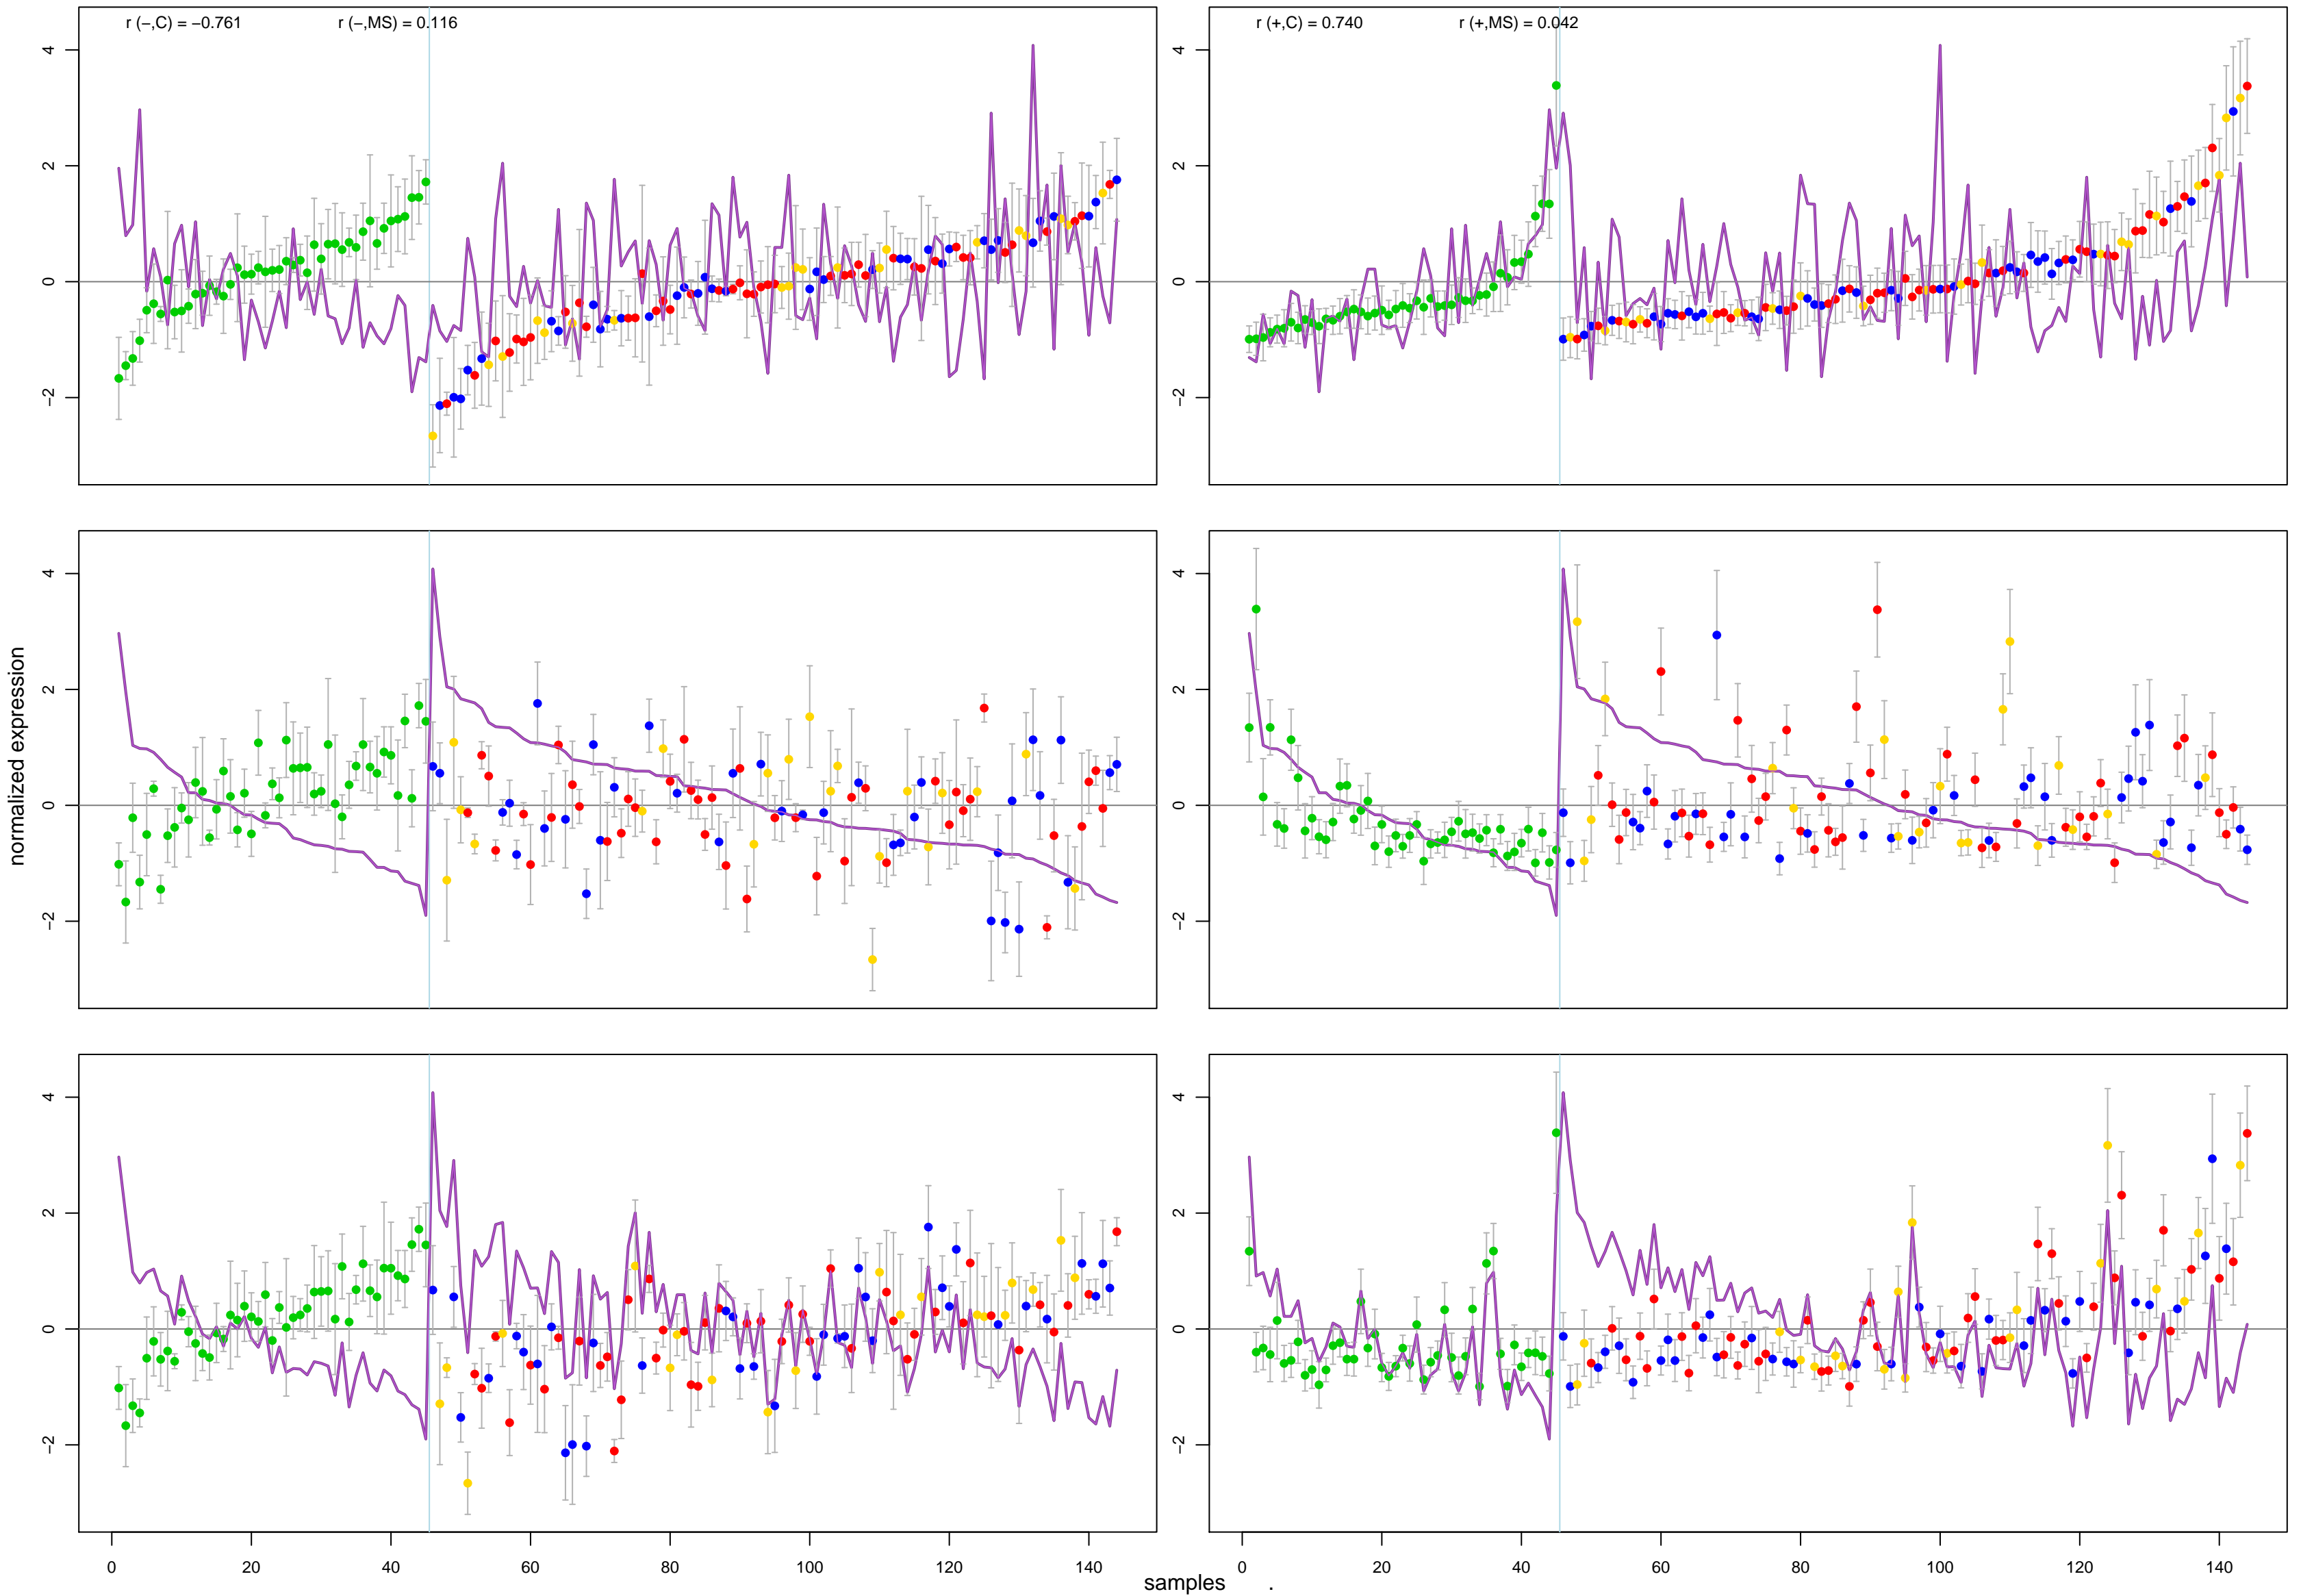



JMJD3

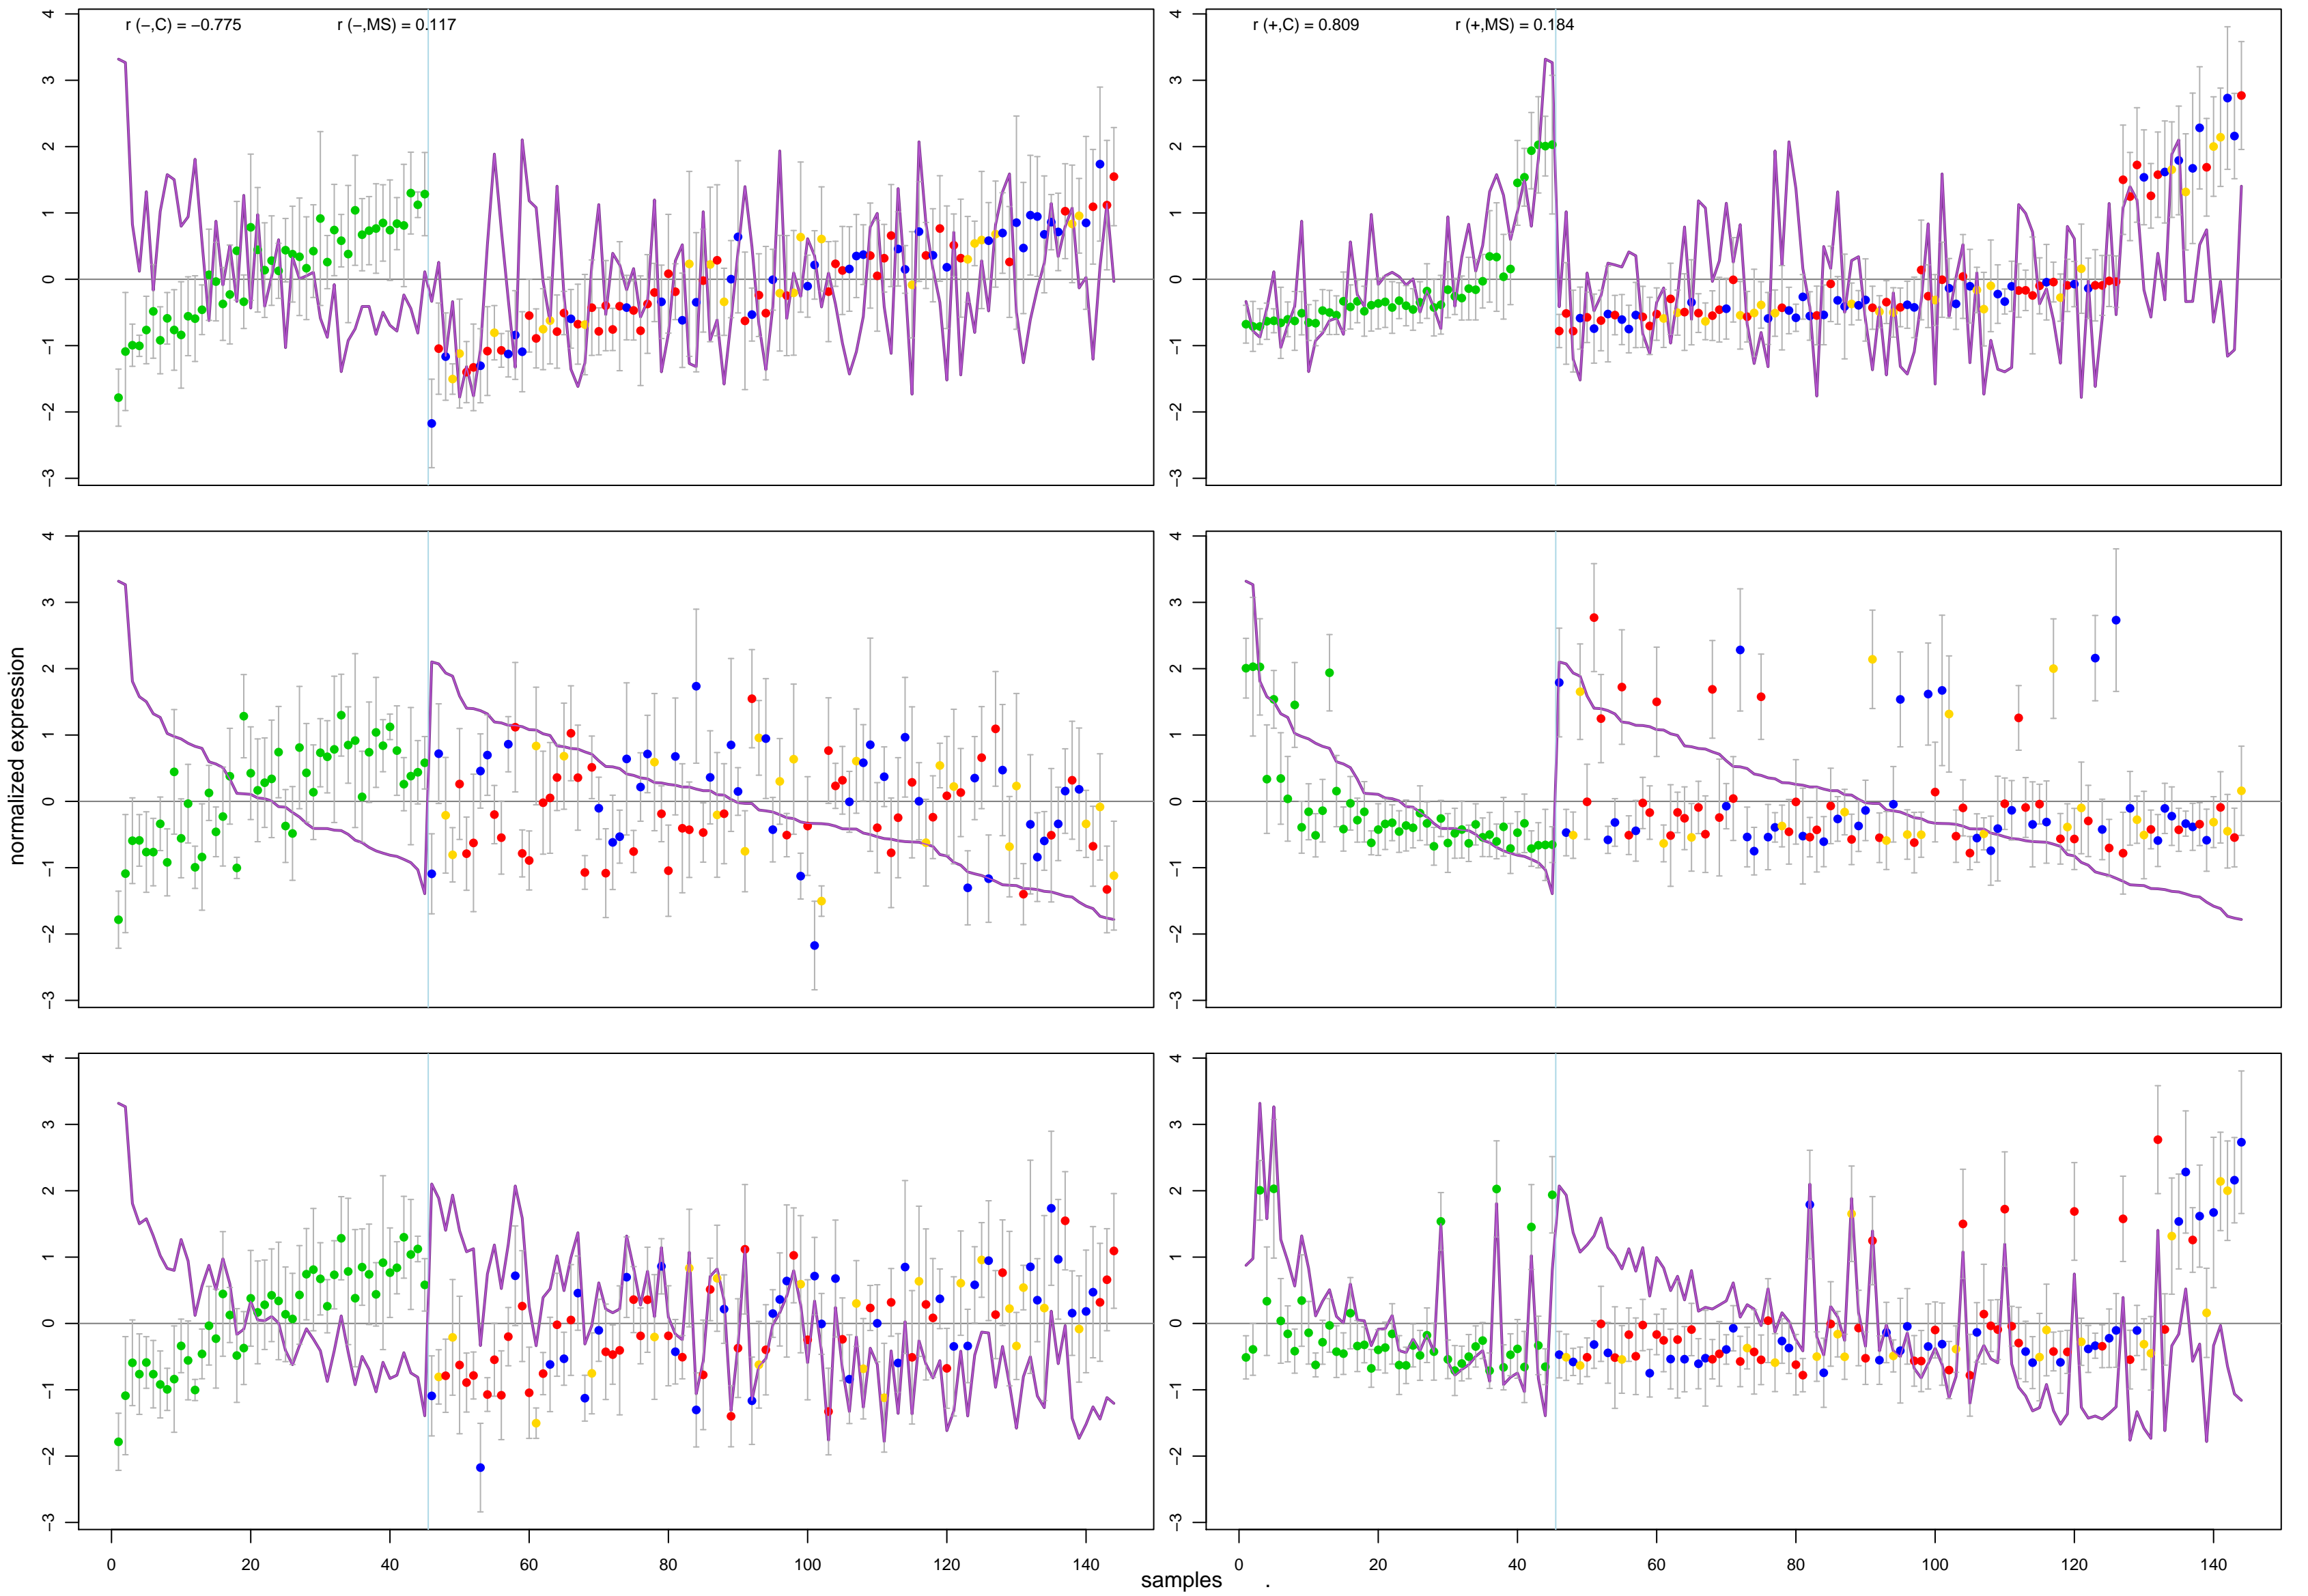

# KCNMA1

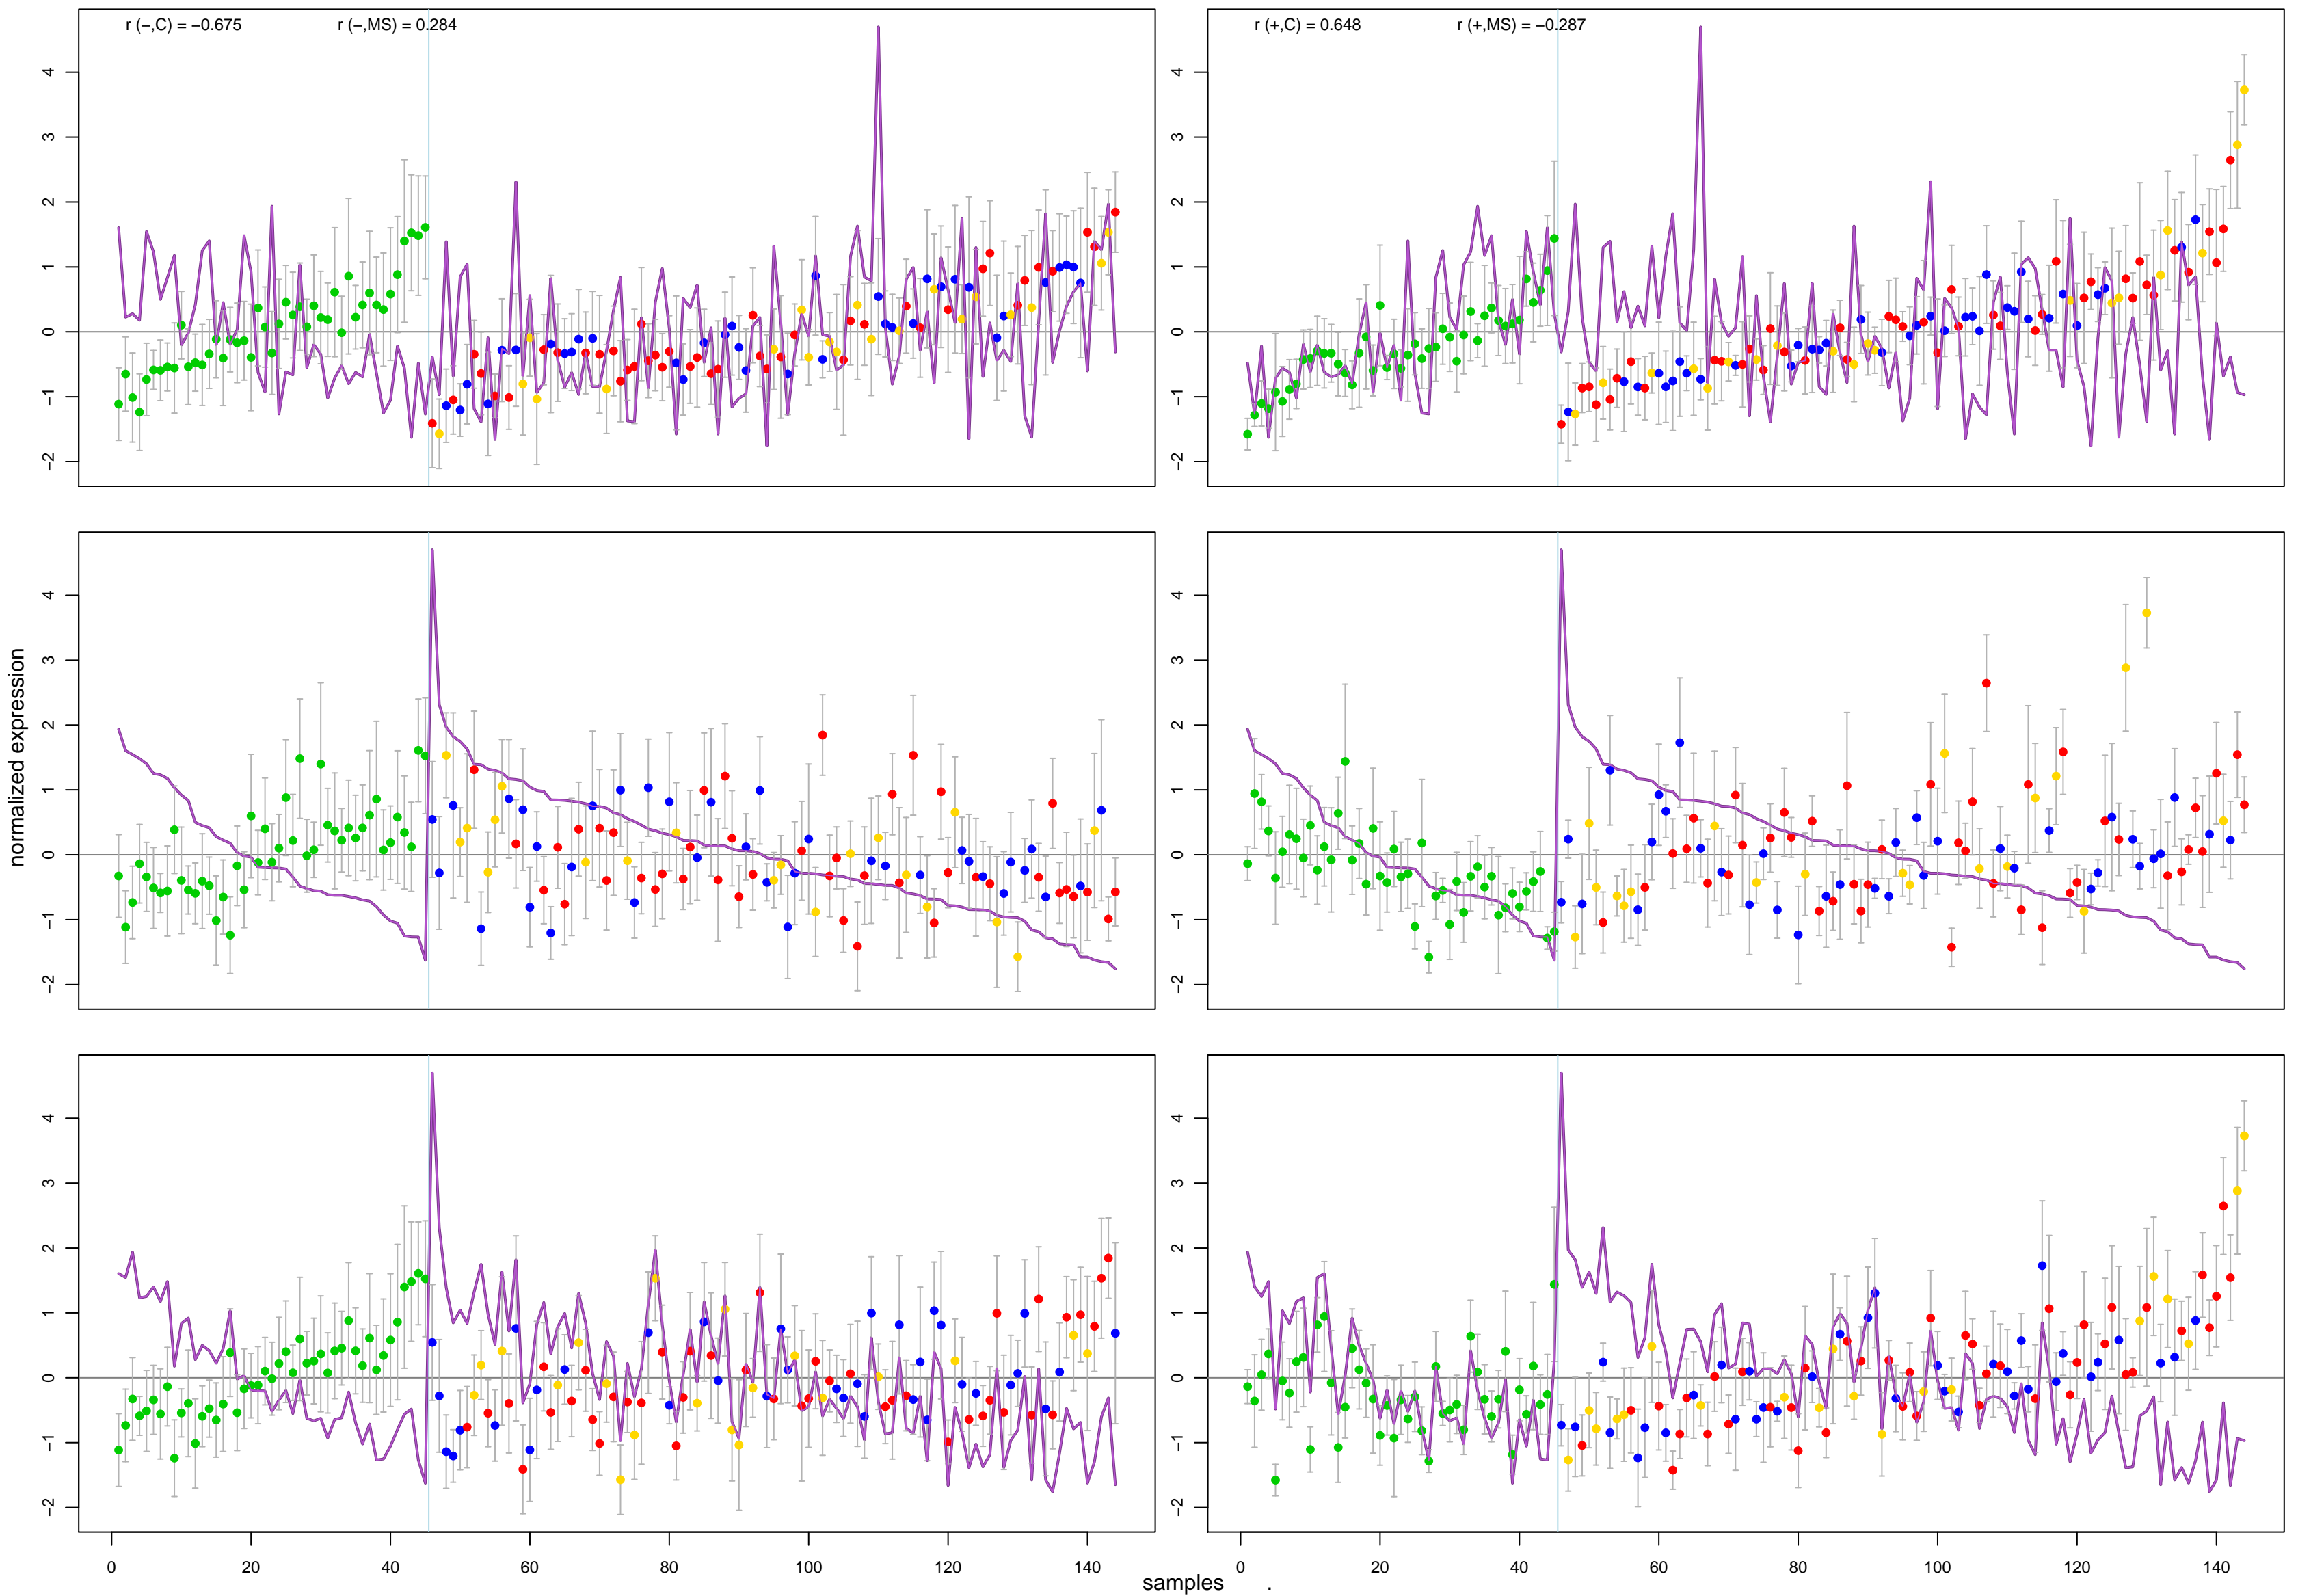

# KIAA0323

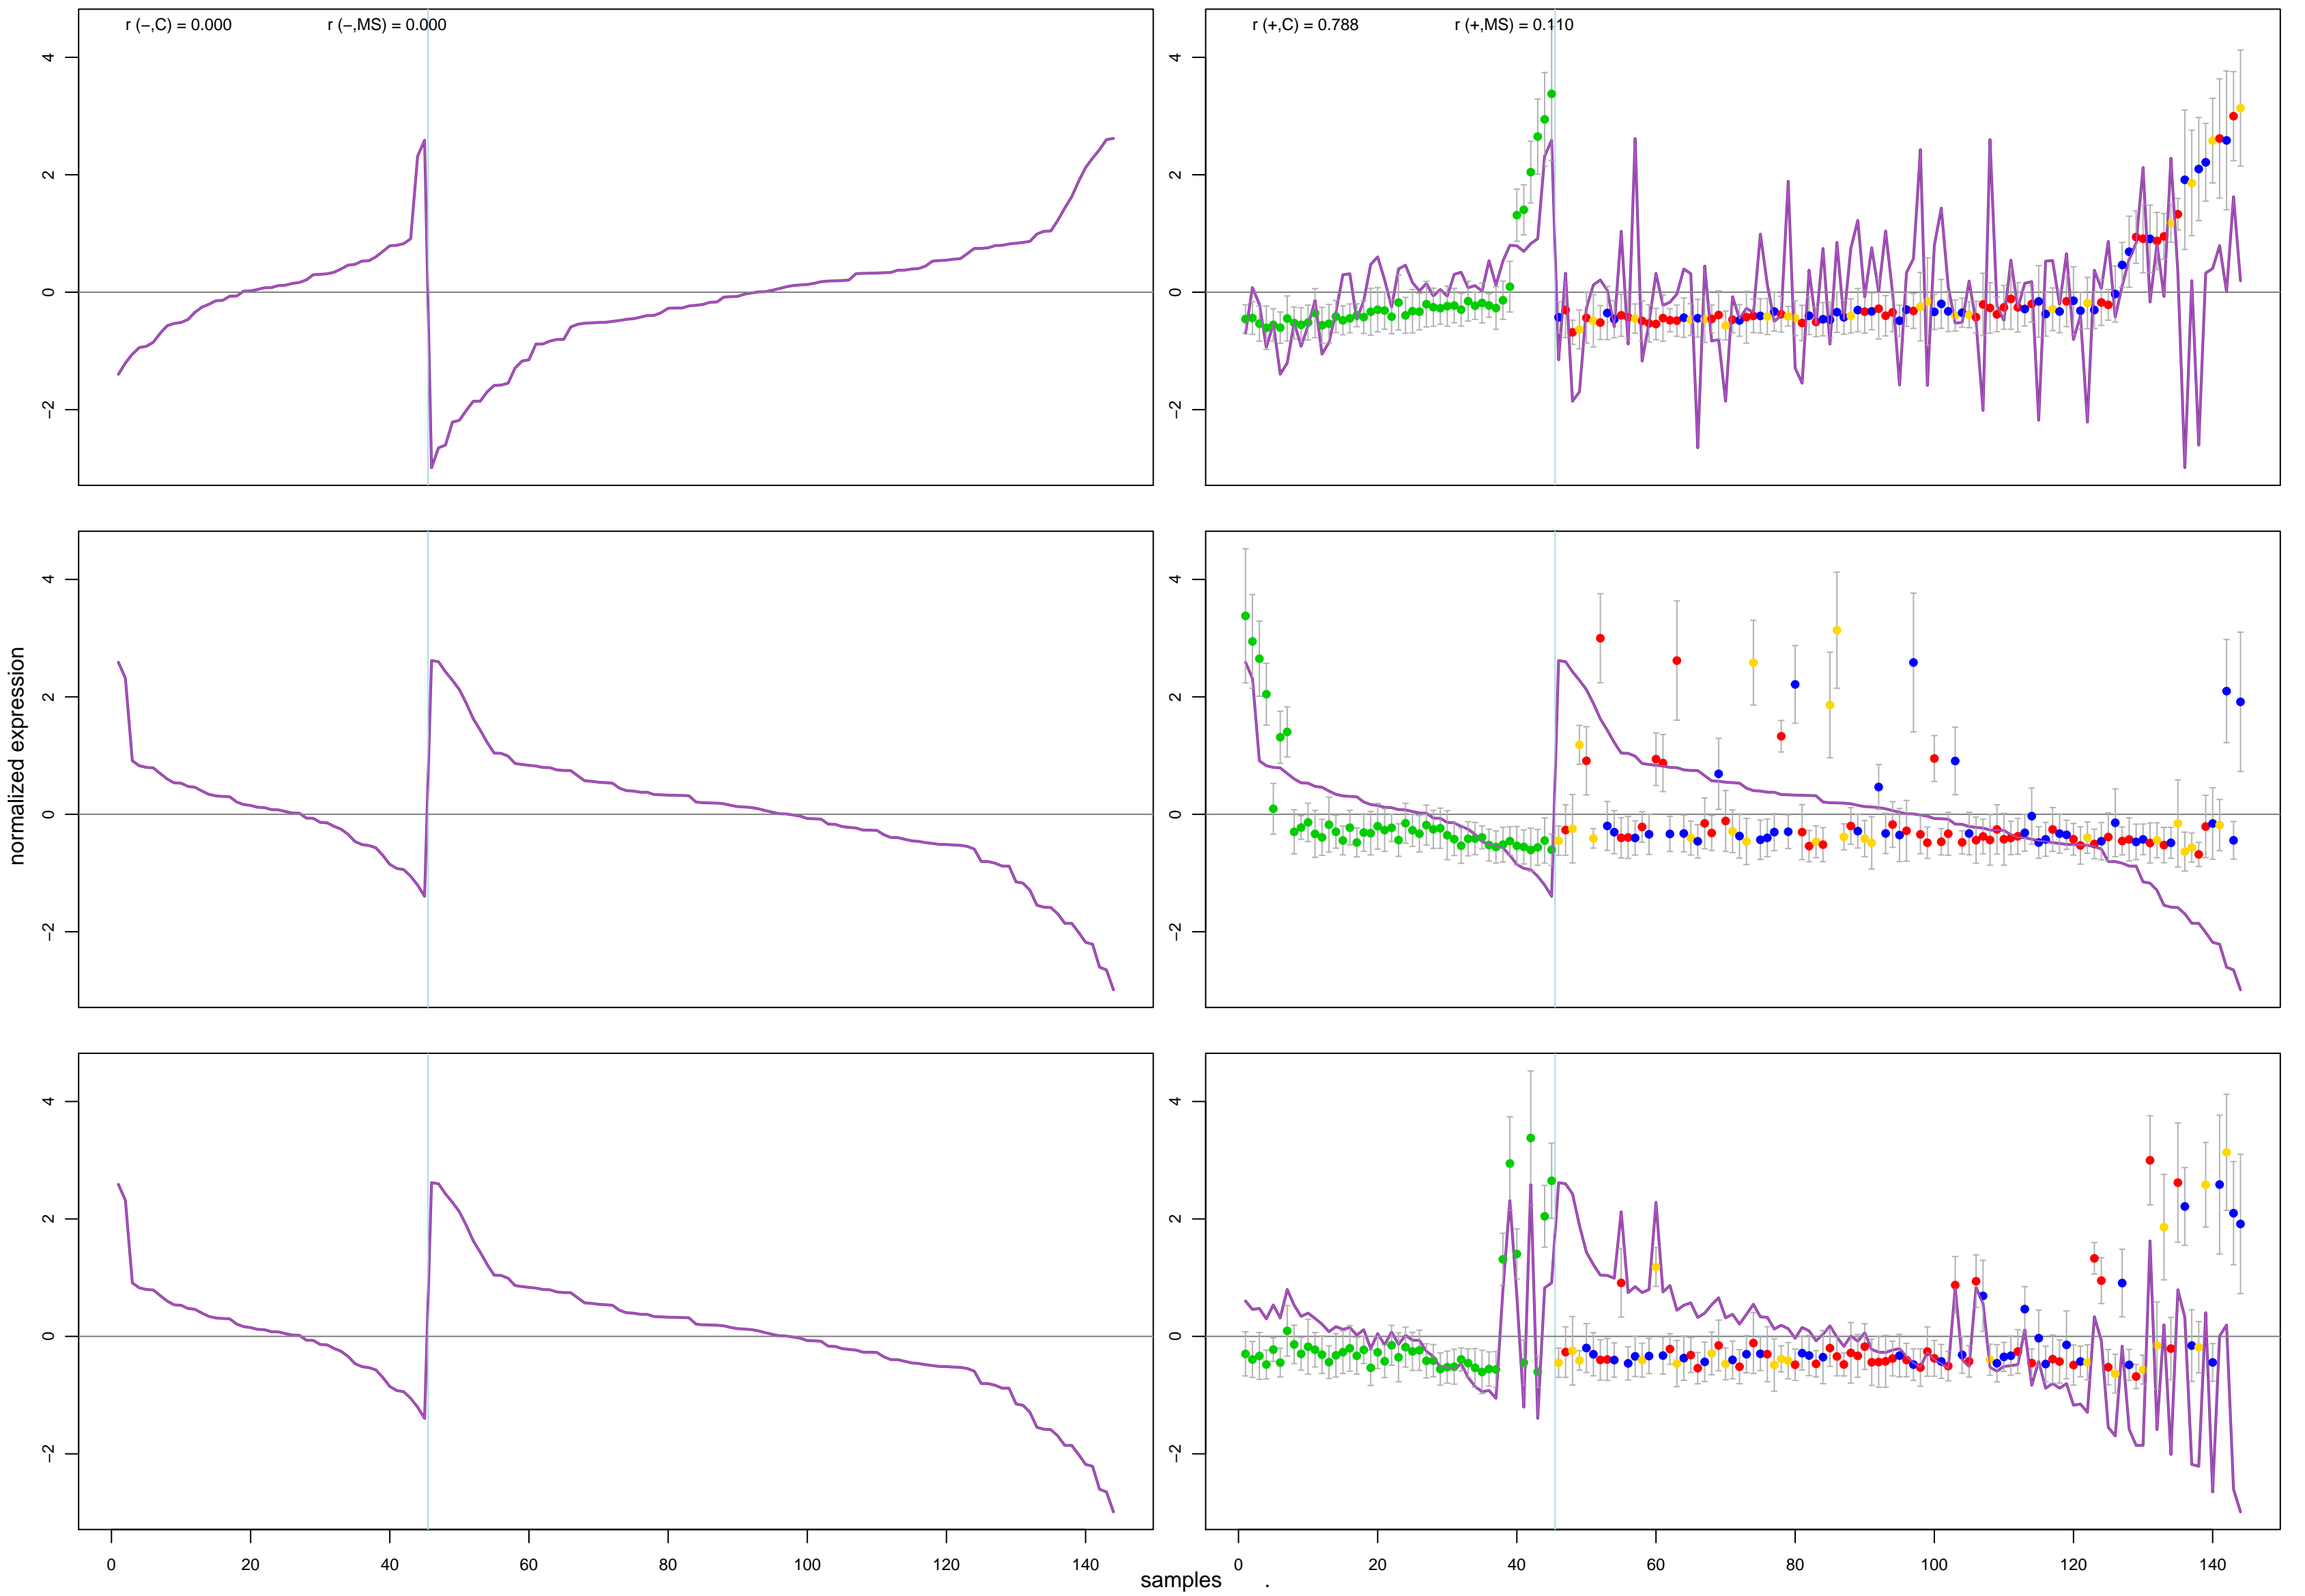

# KRTAP19-6

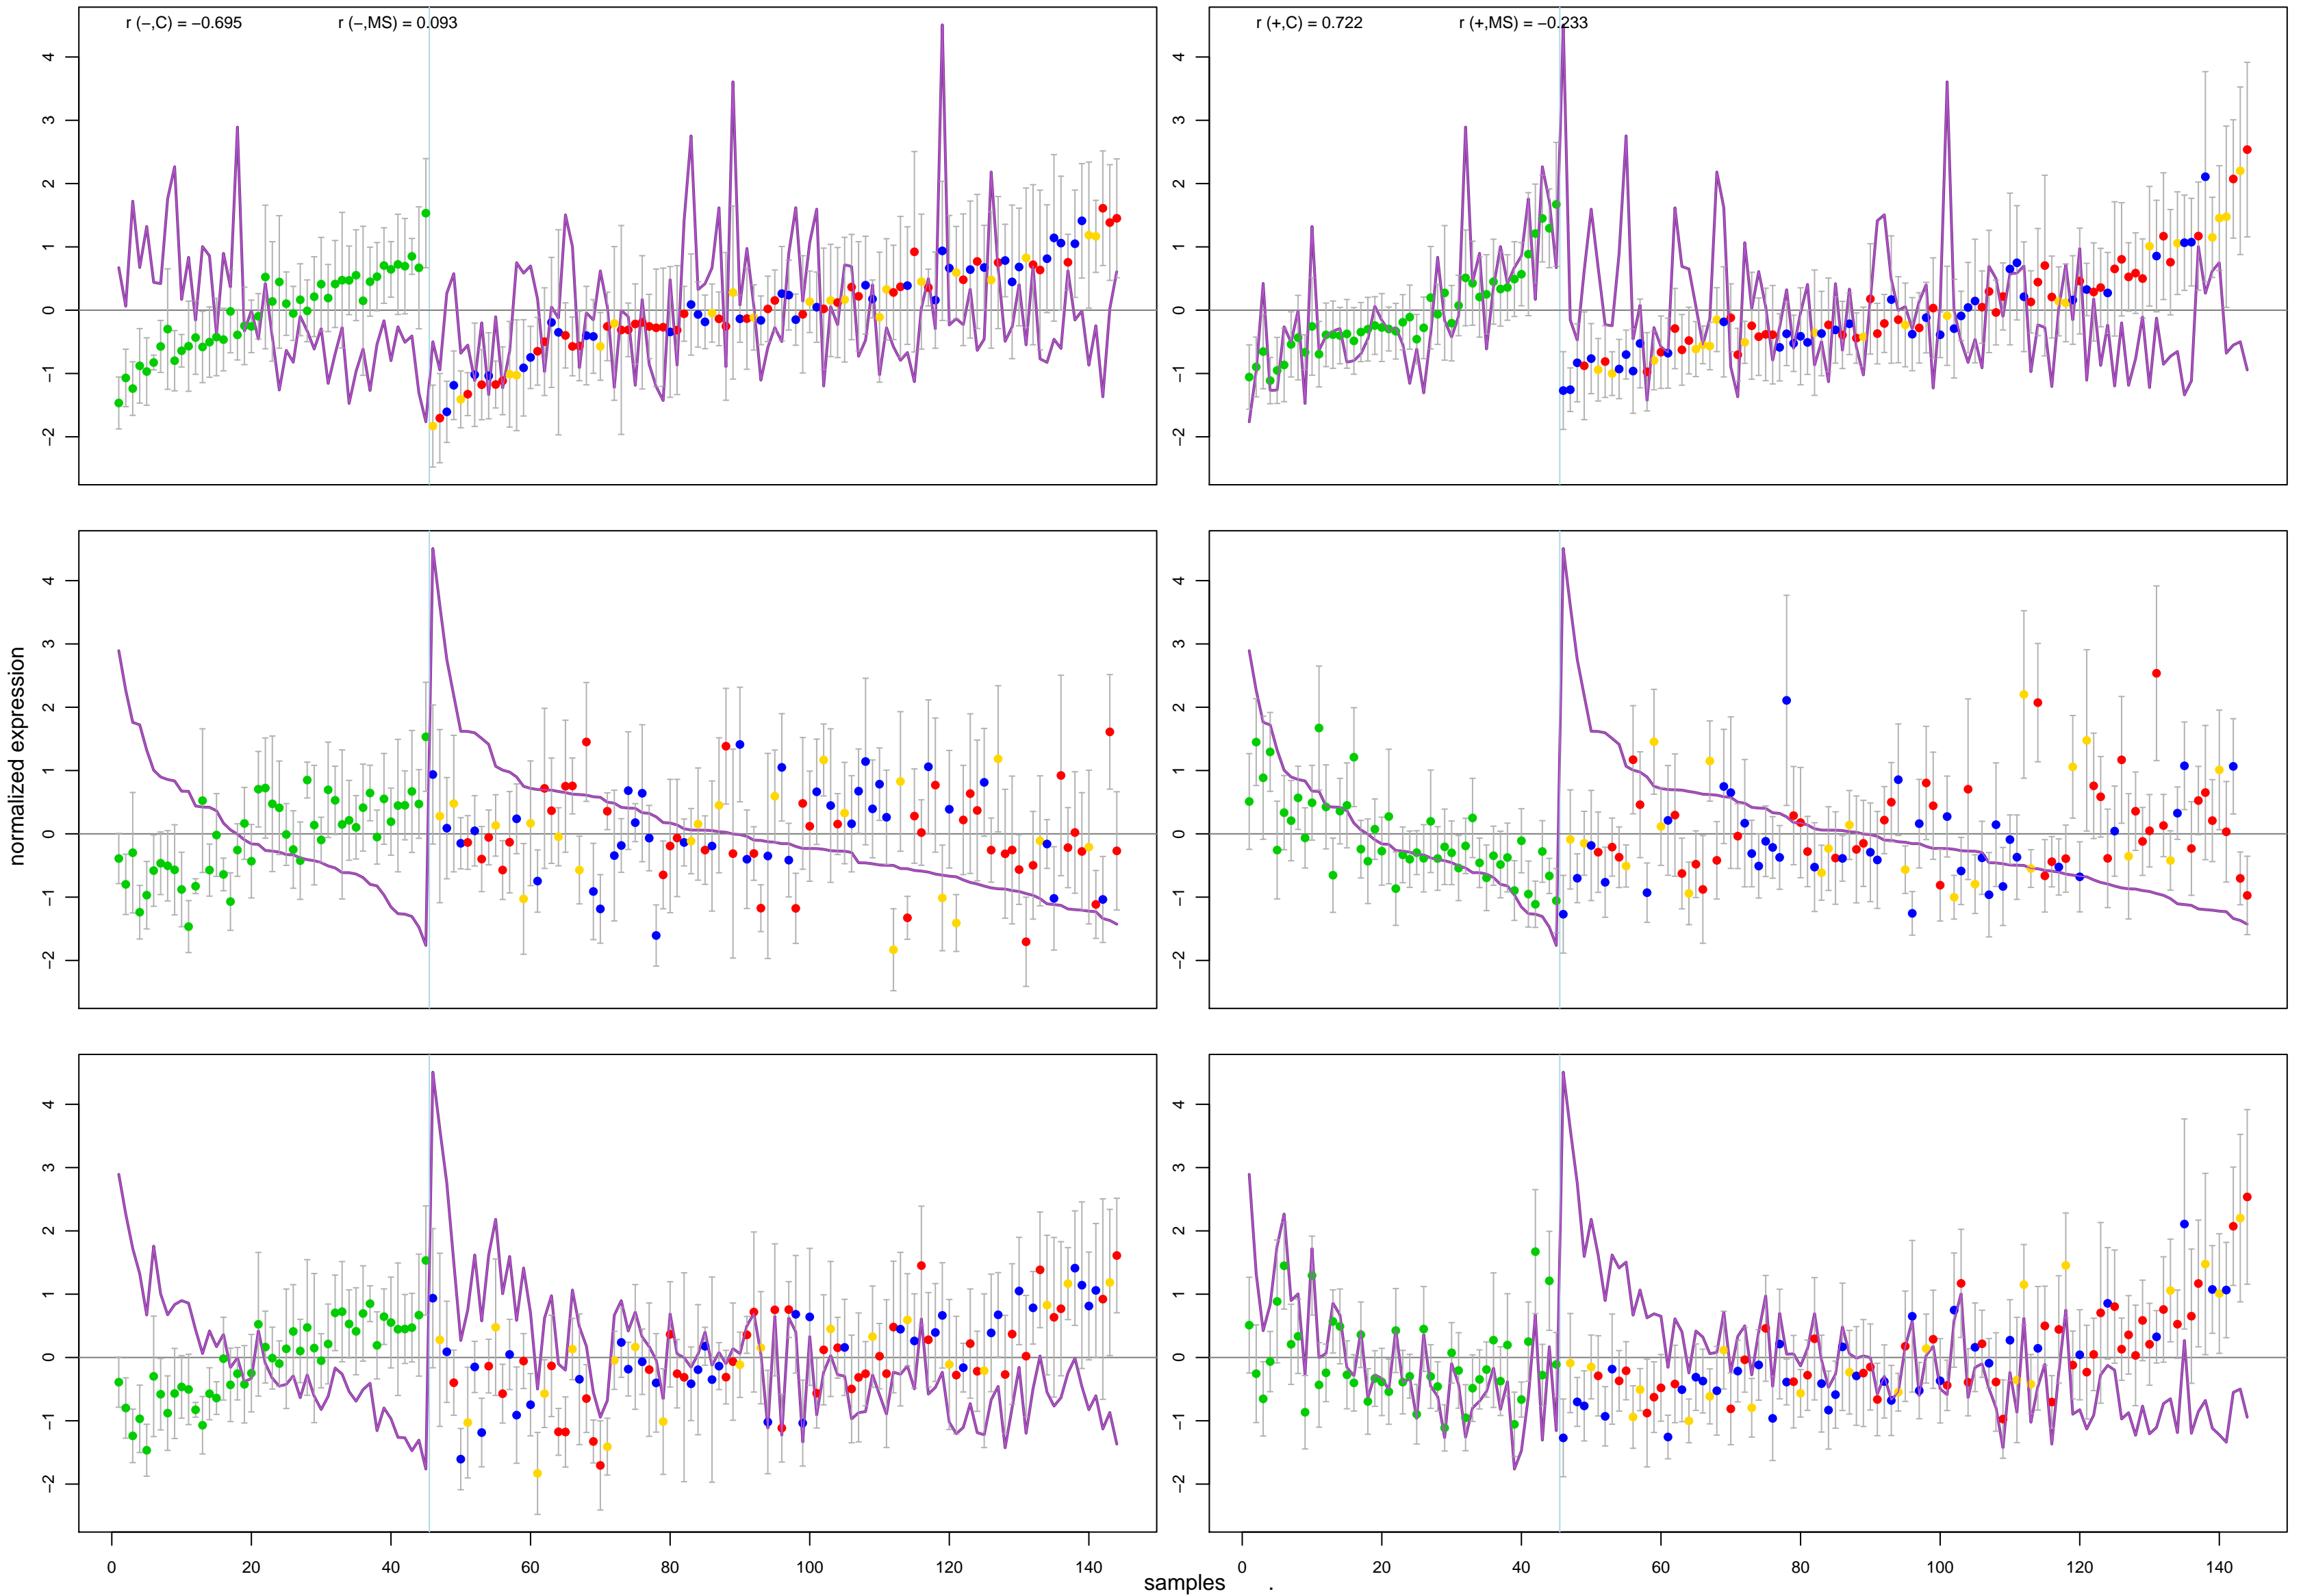



# LOC387870

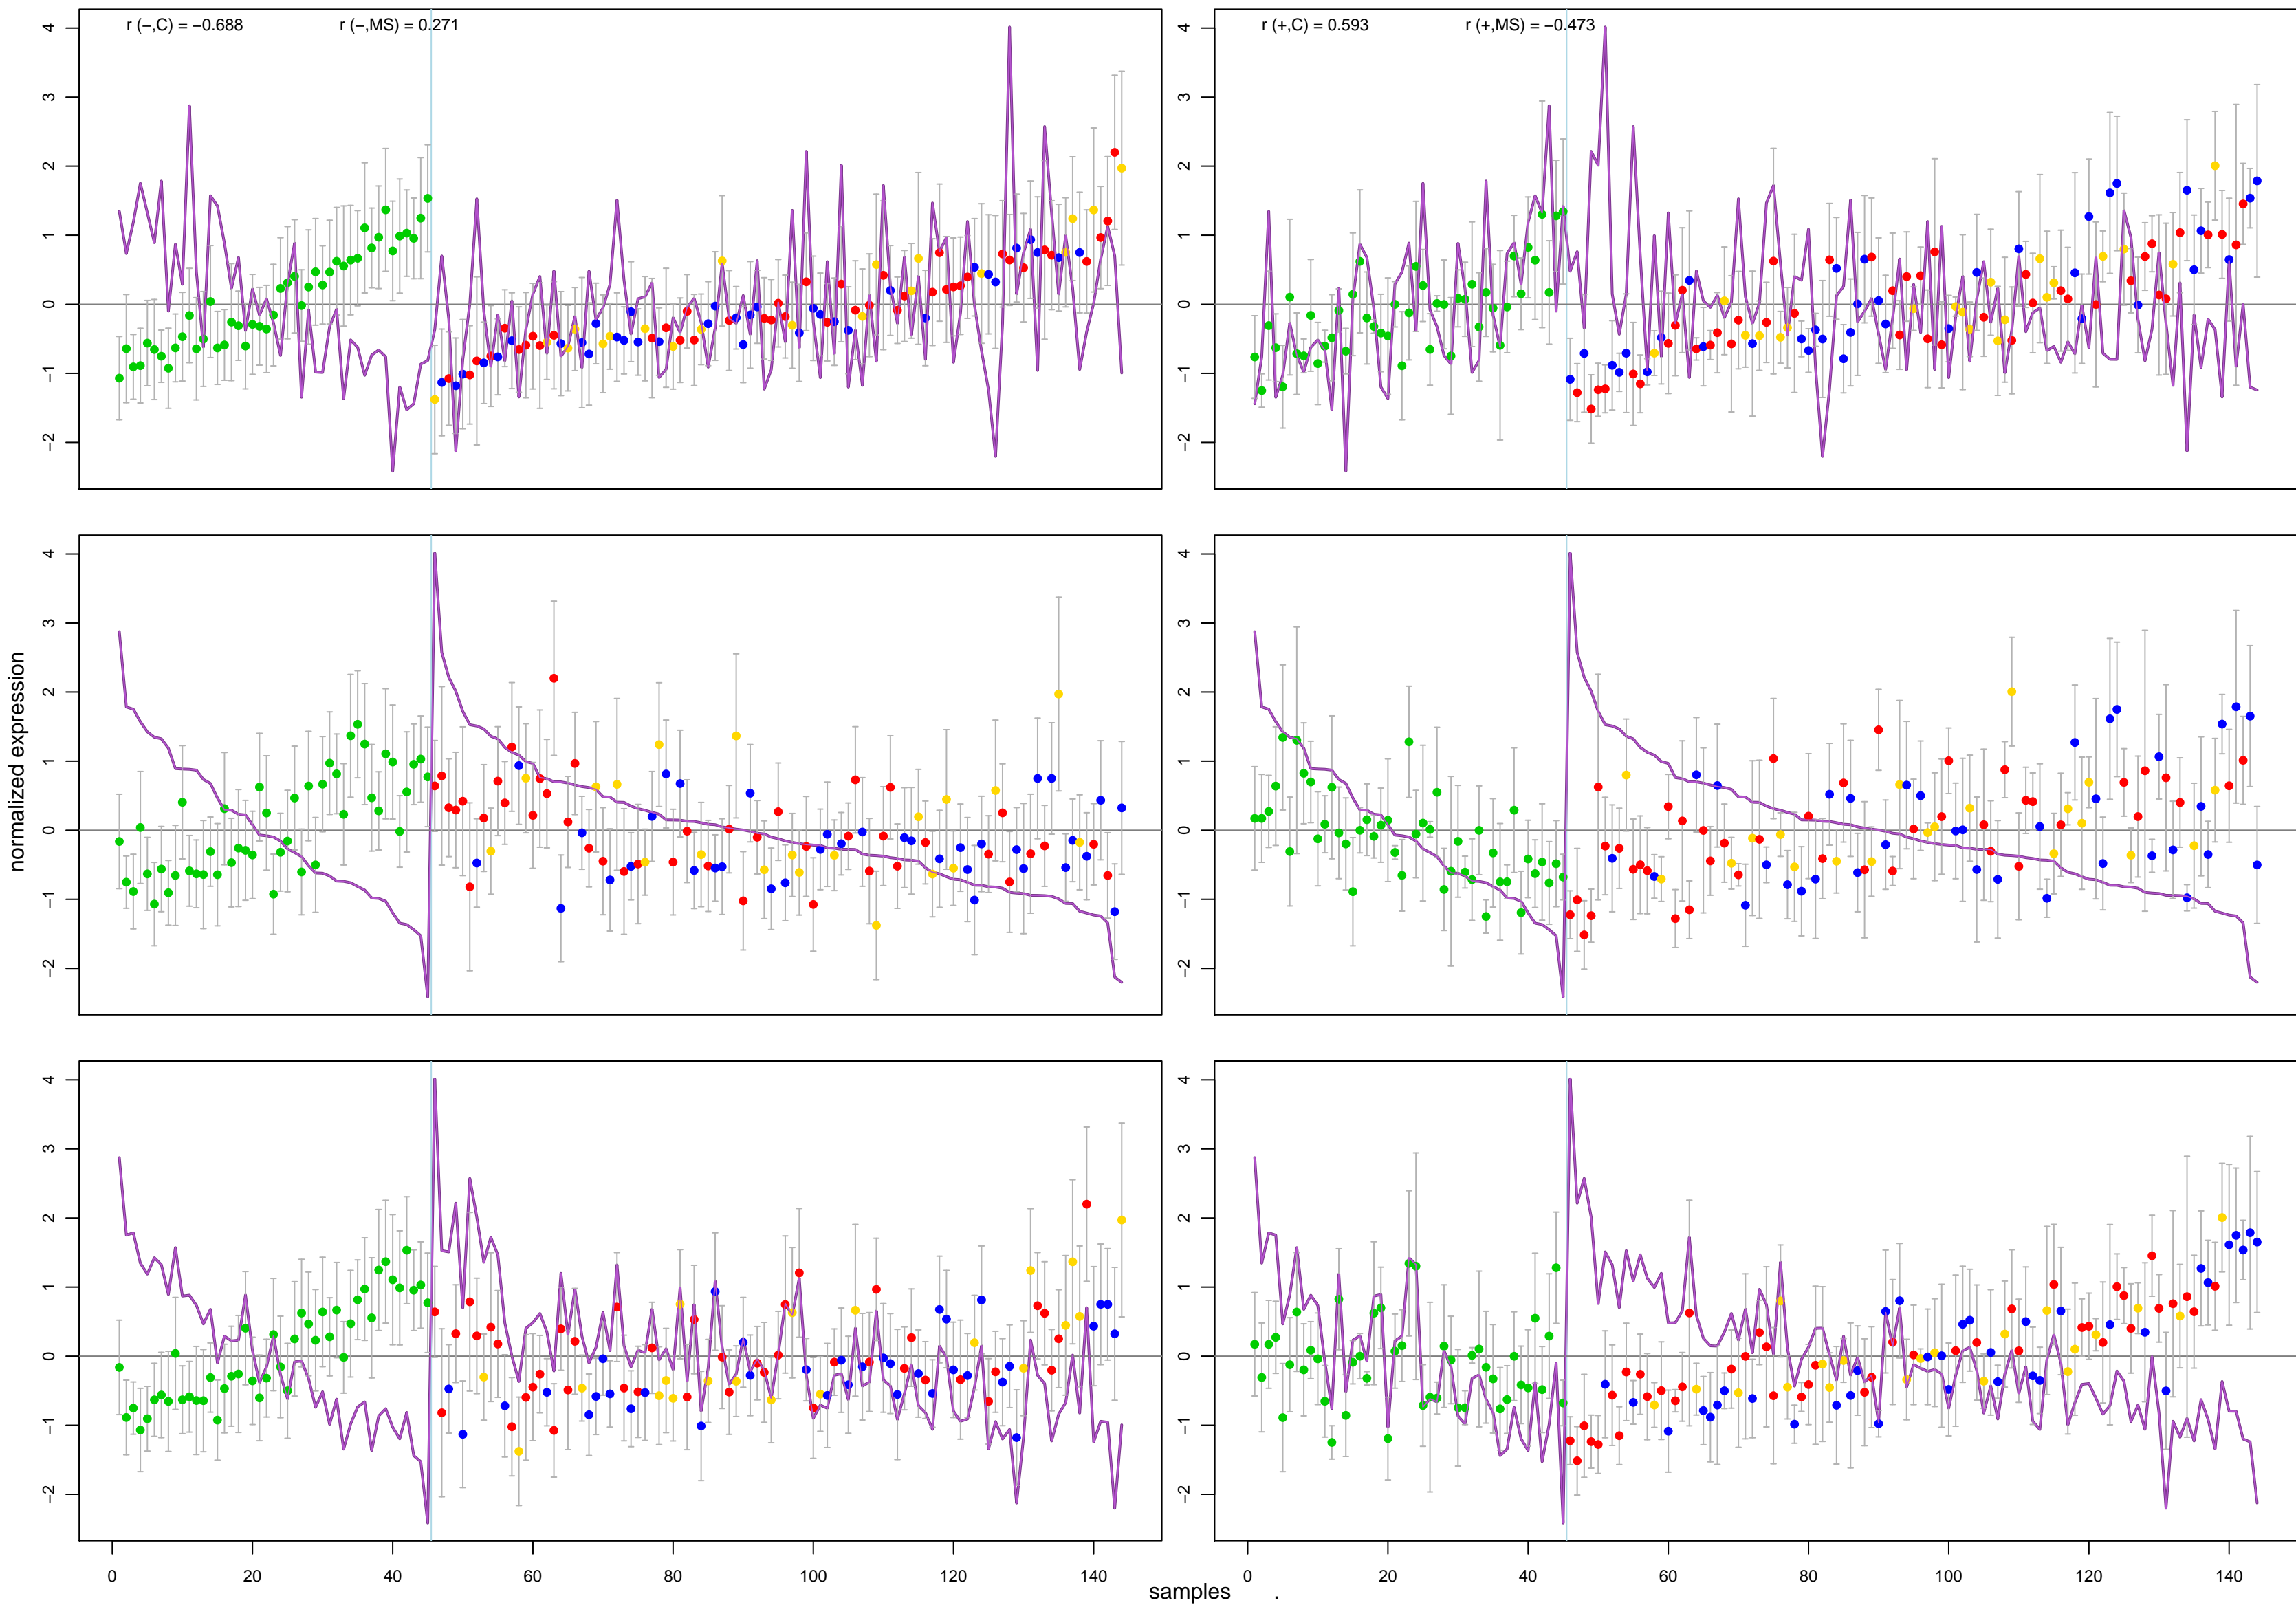

LOC643121 (GTPBP10)

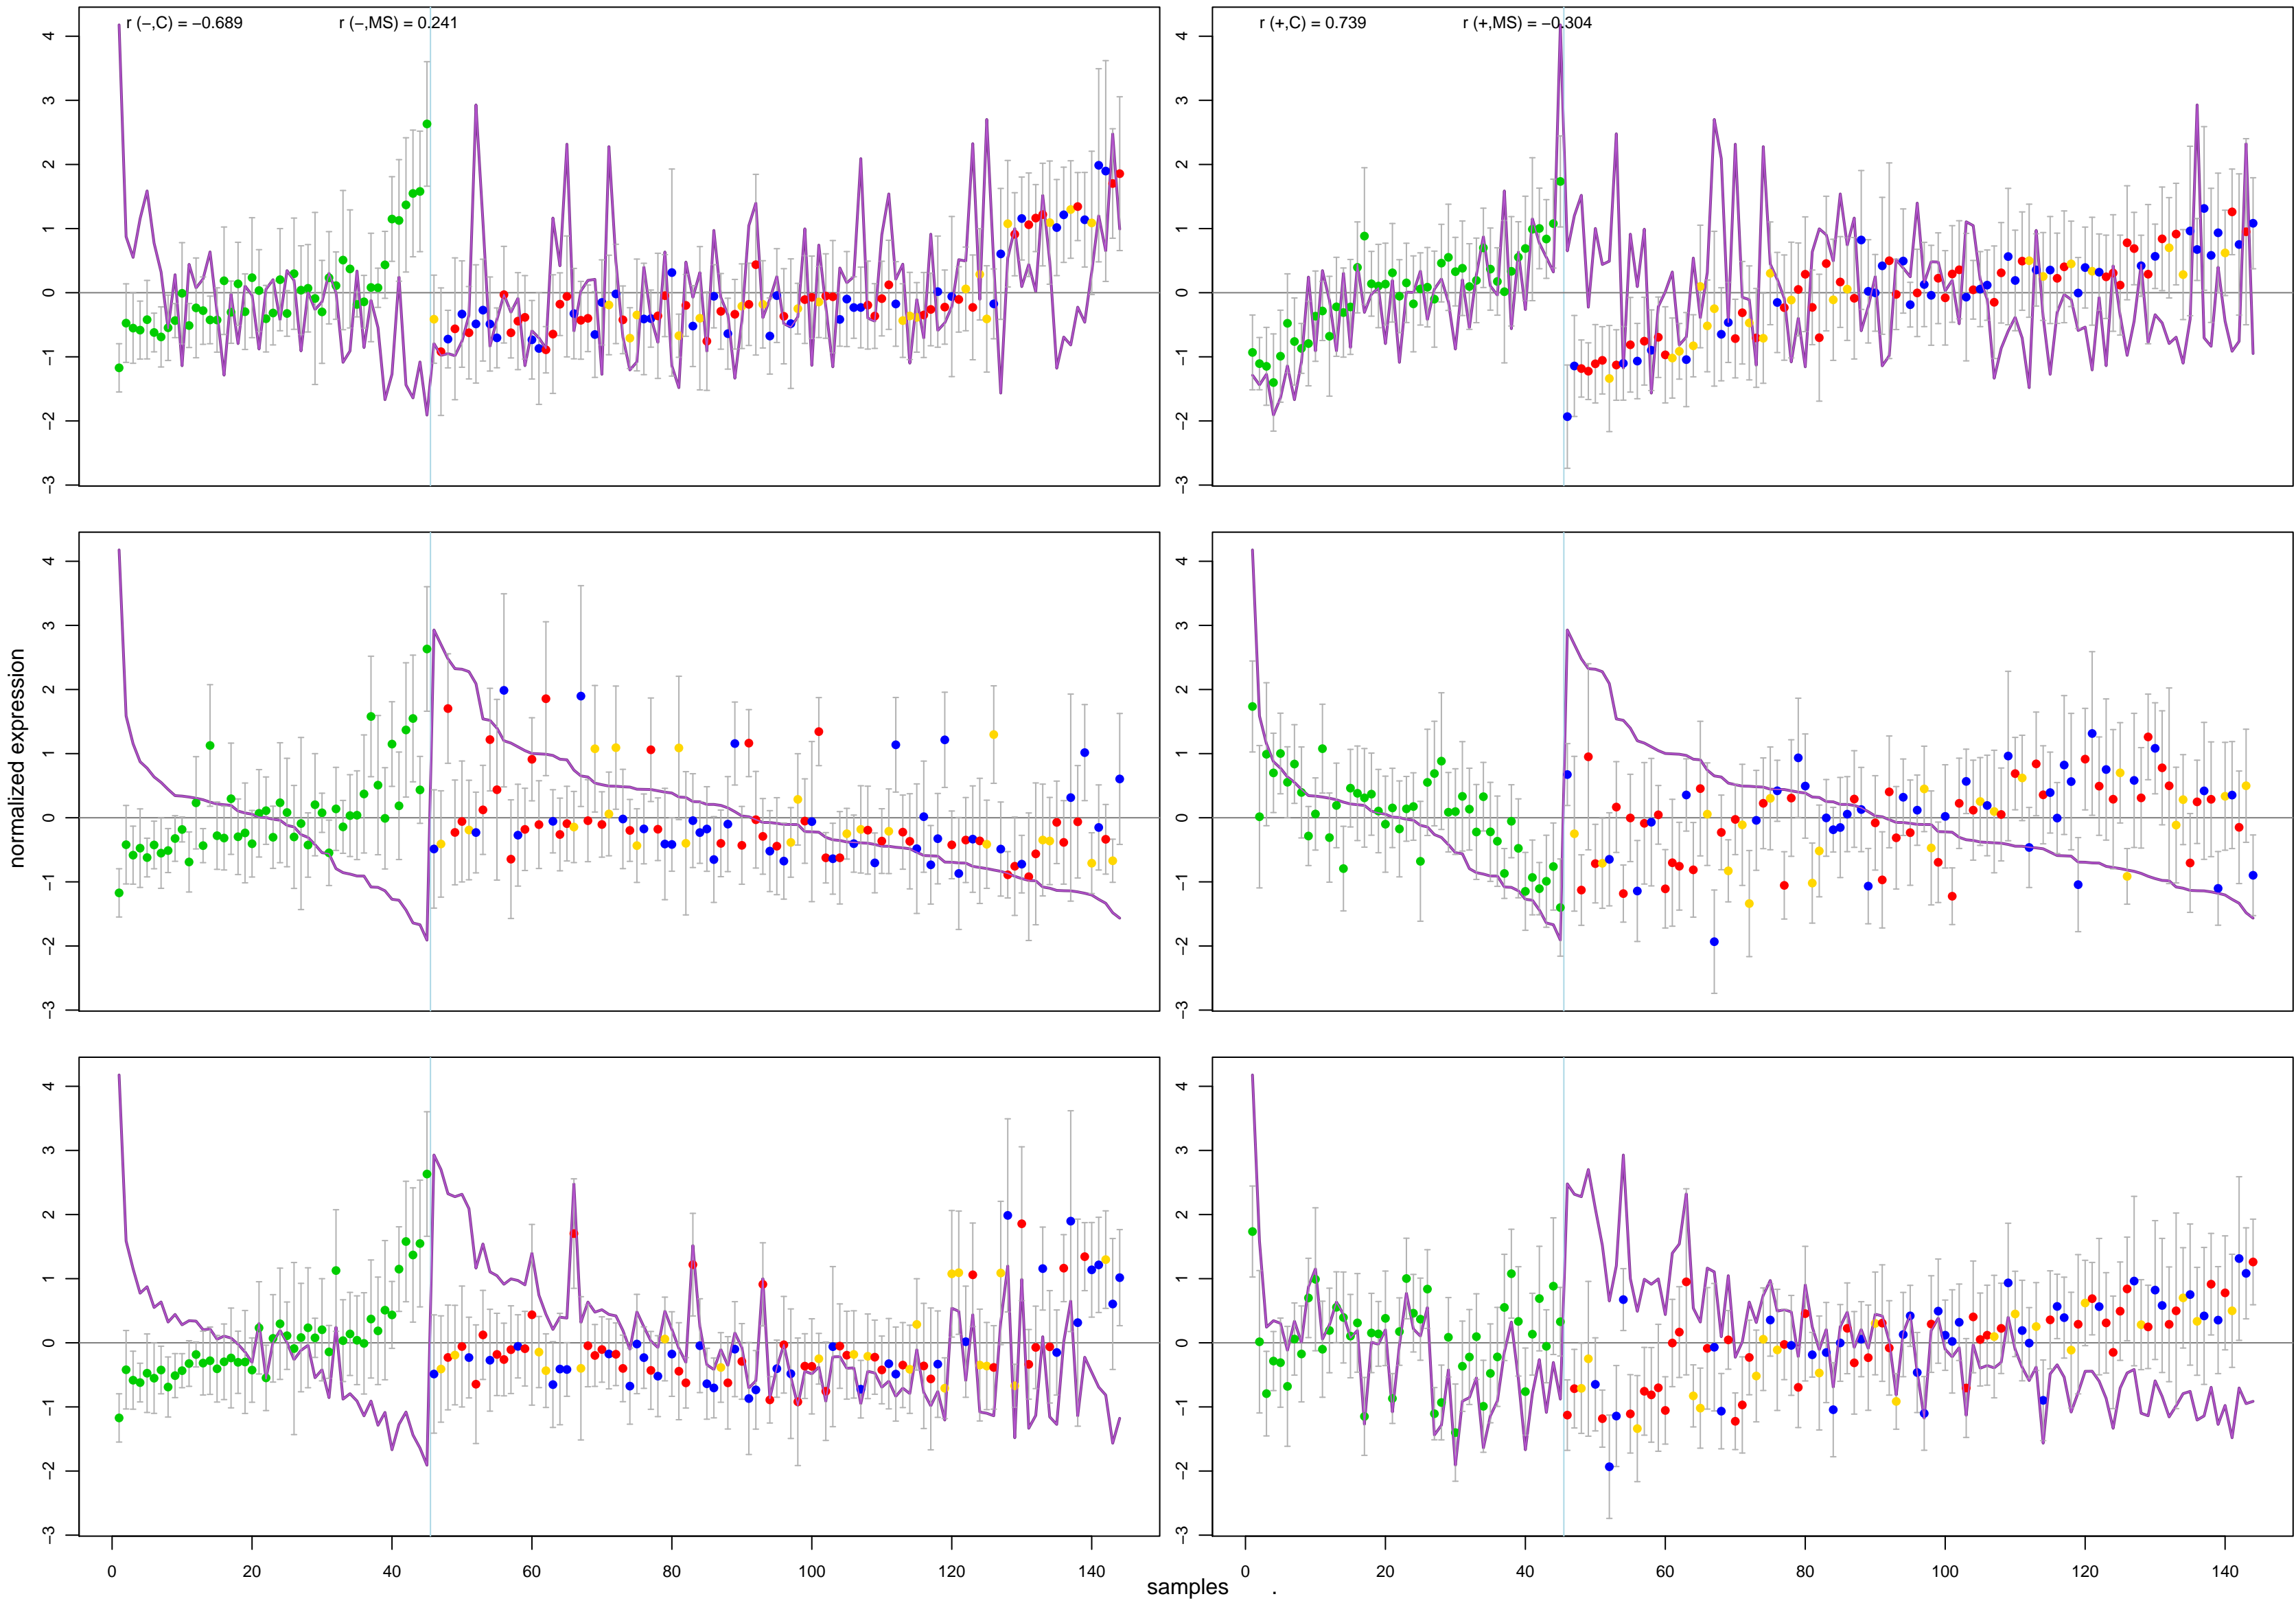

# LOC648716

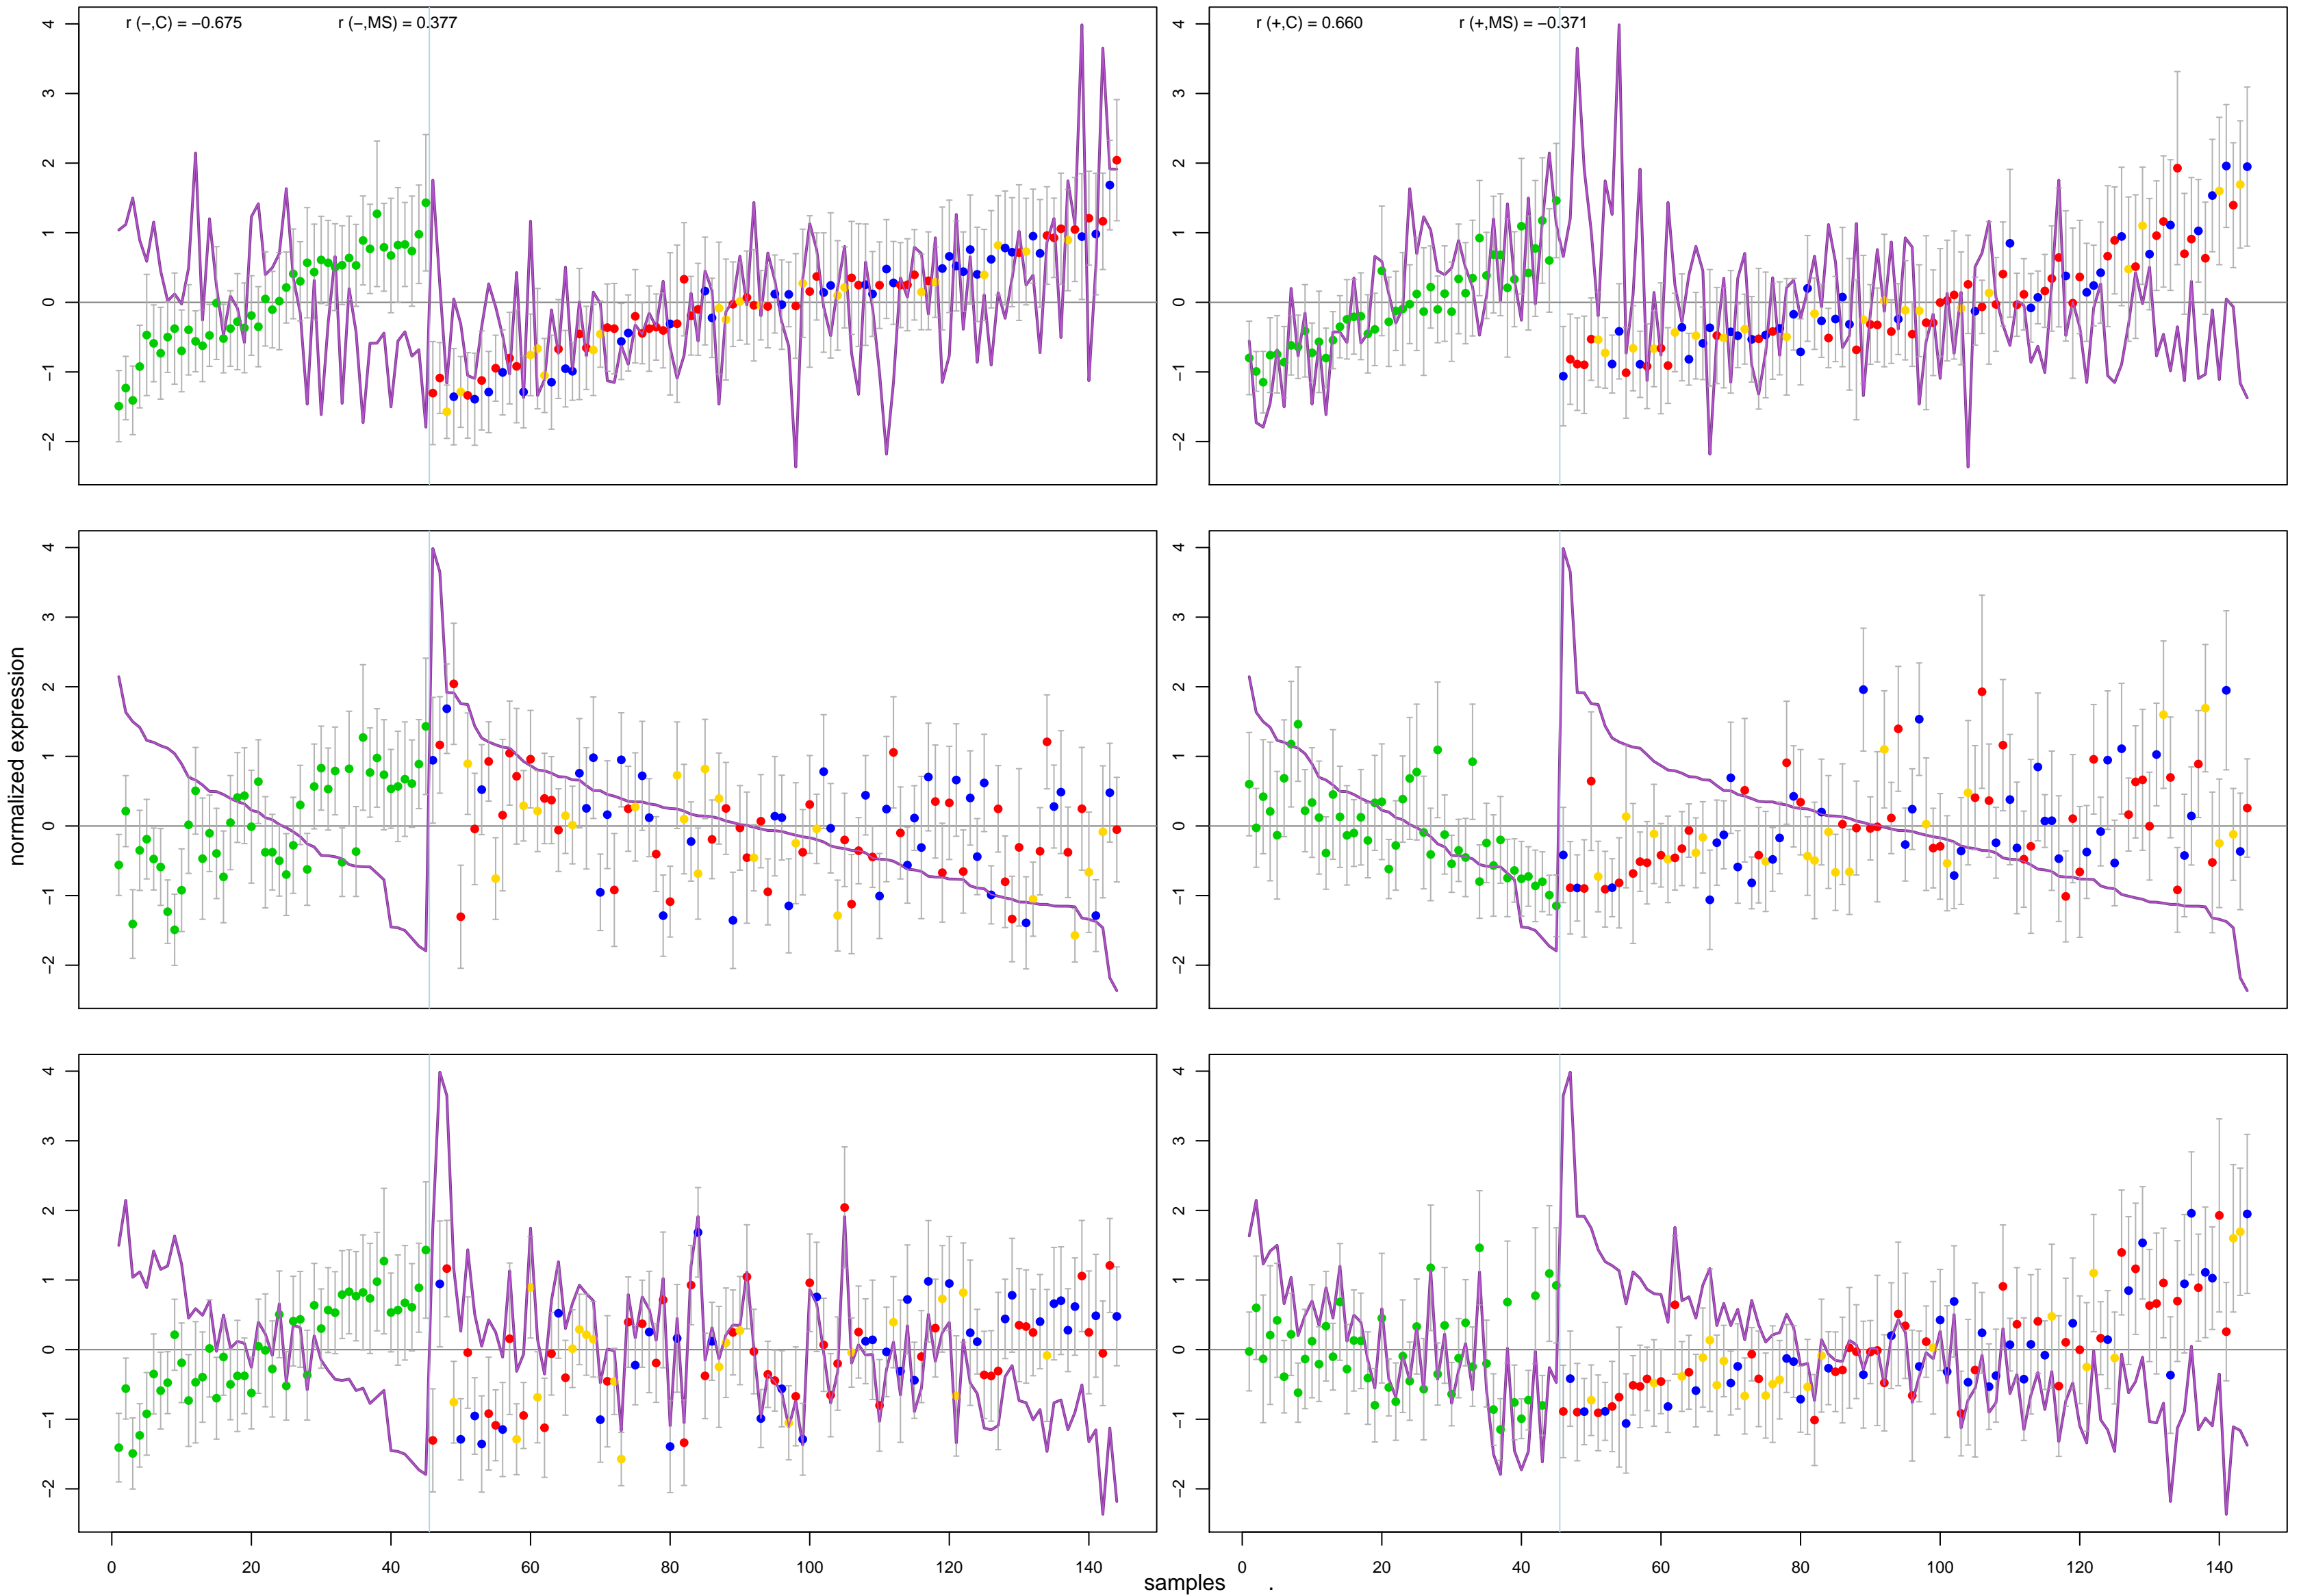

# LOC648814

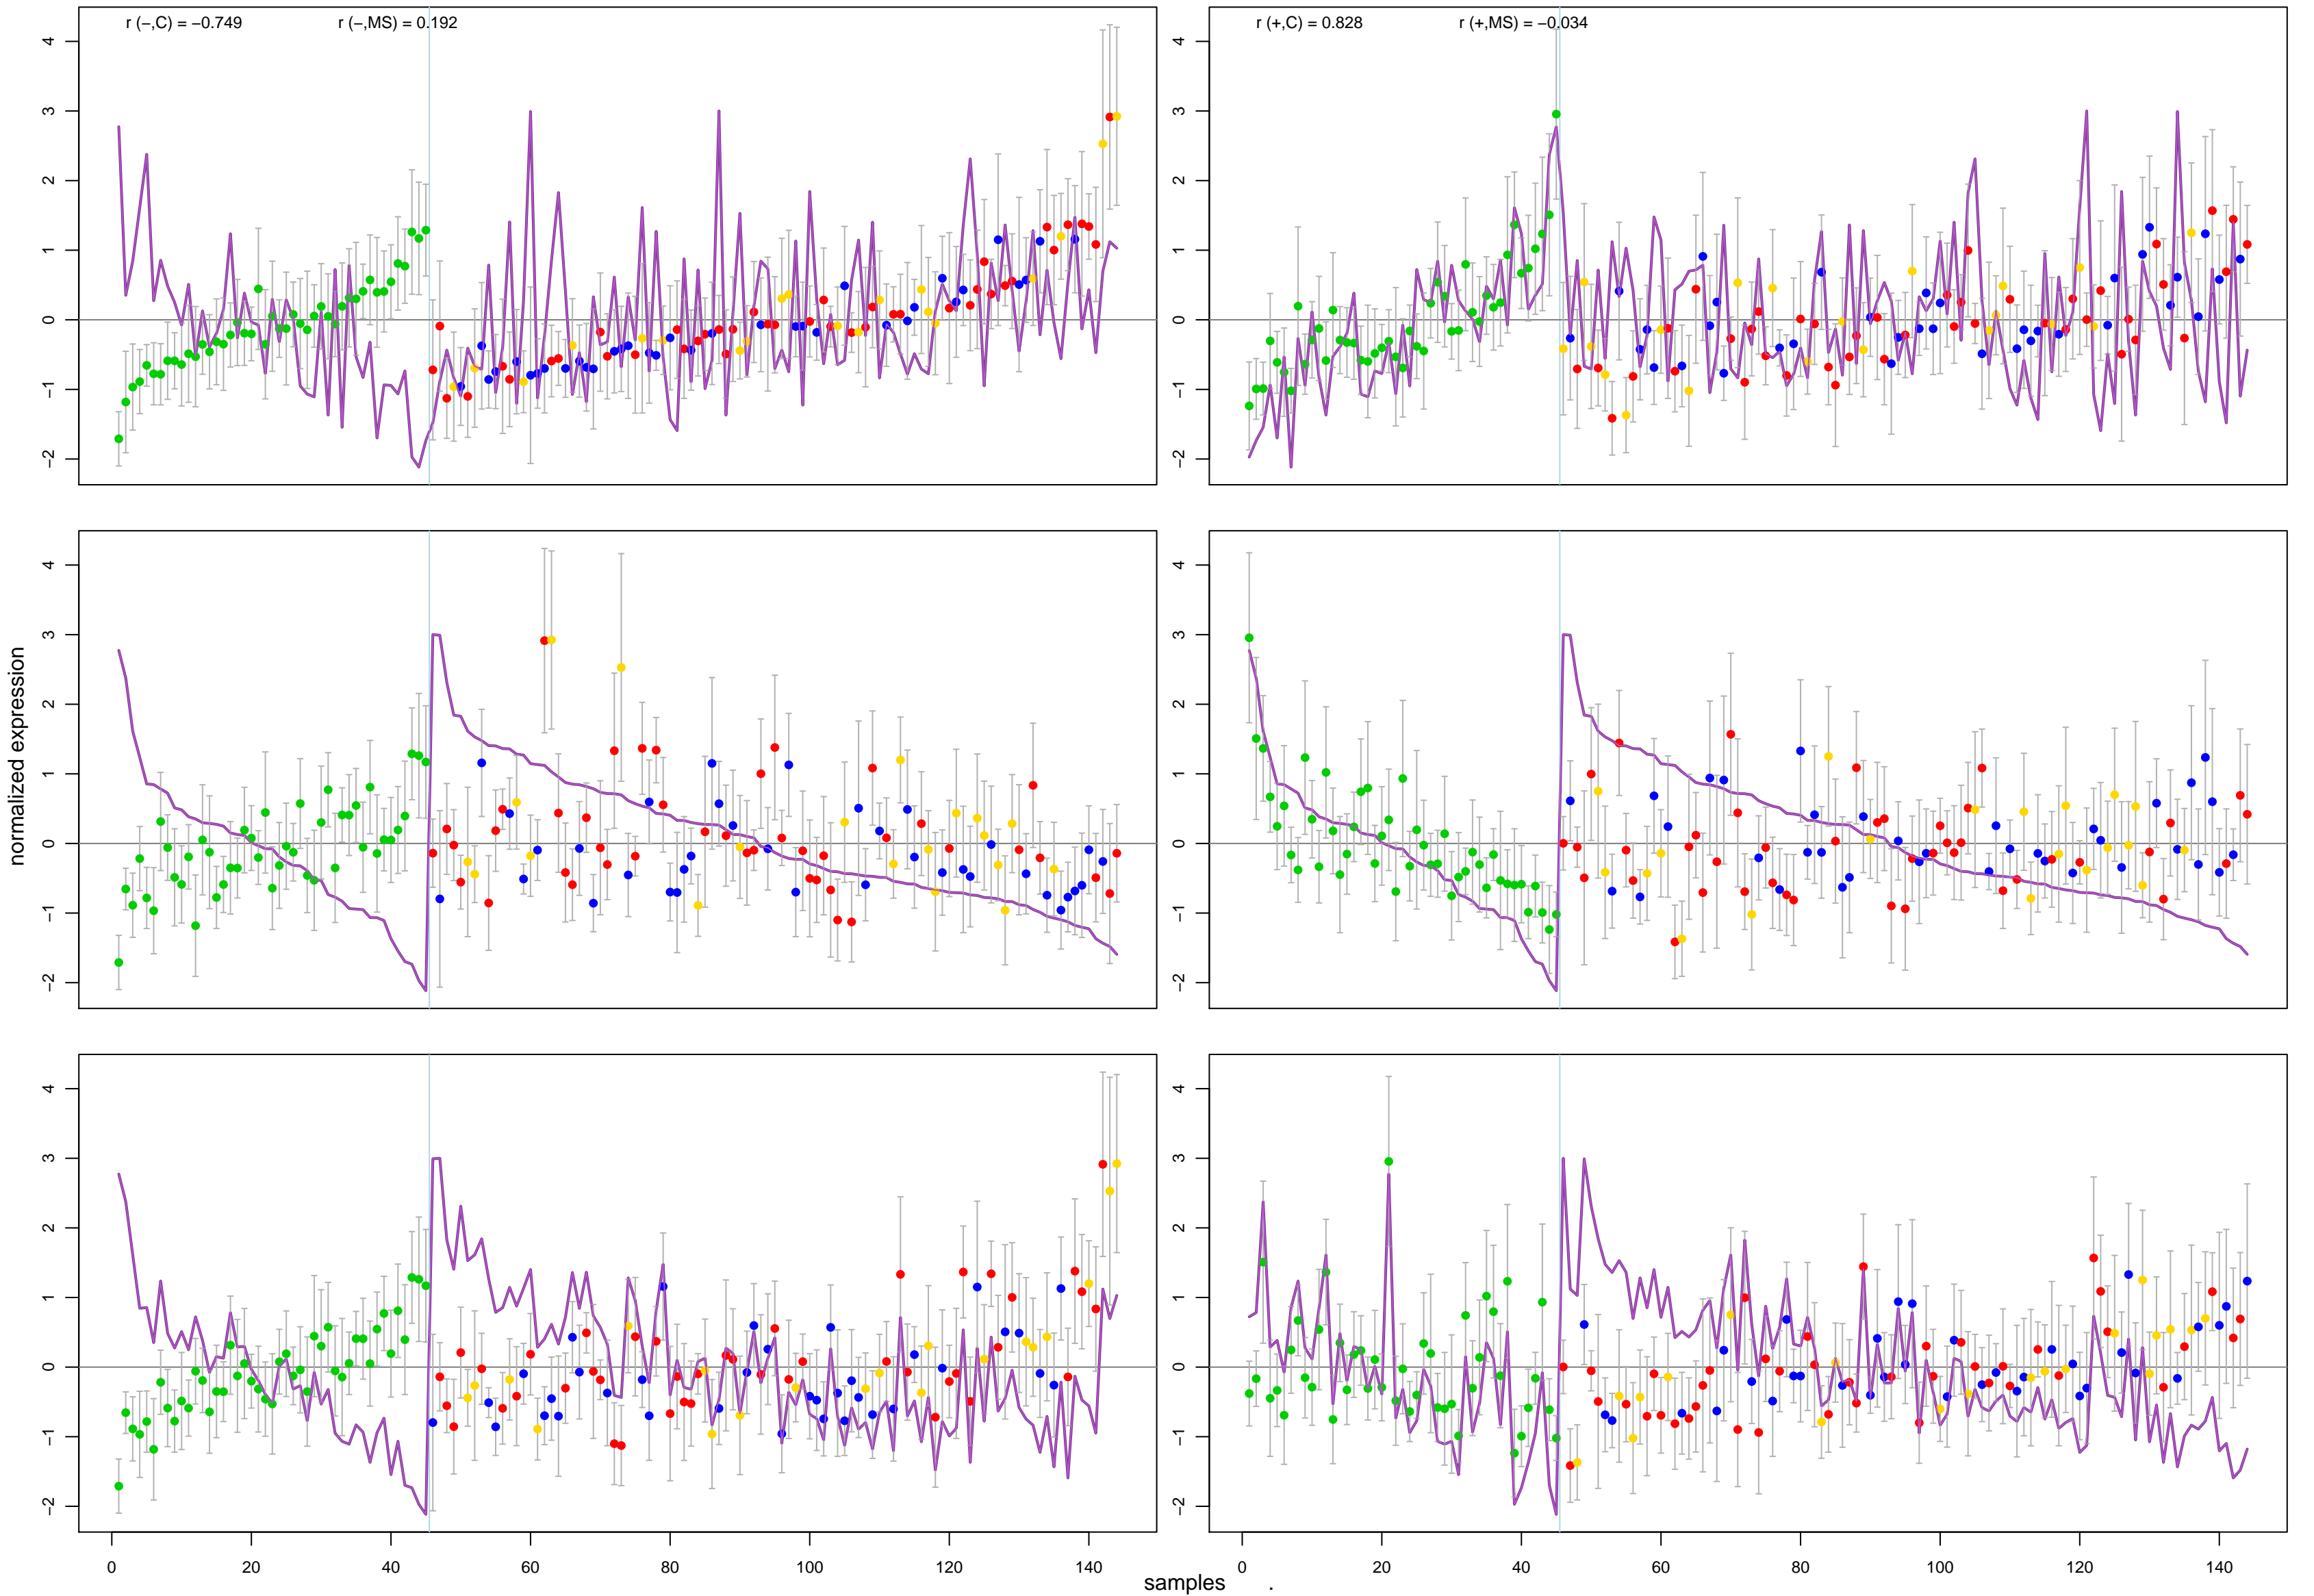



# LOC651316

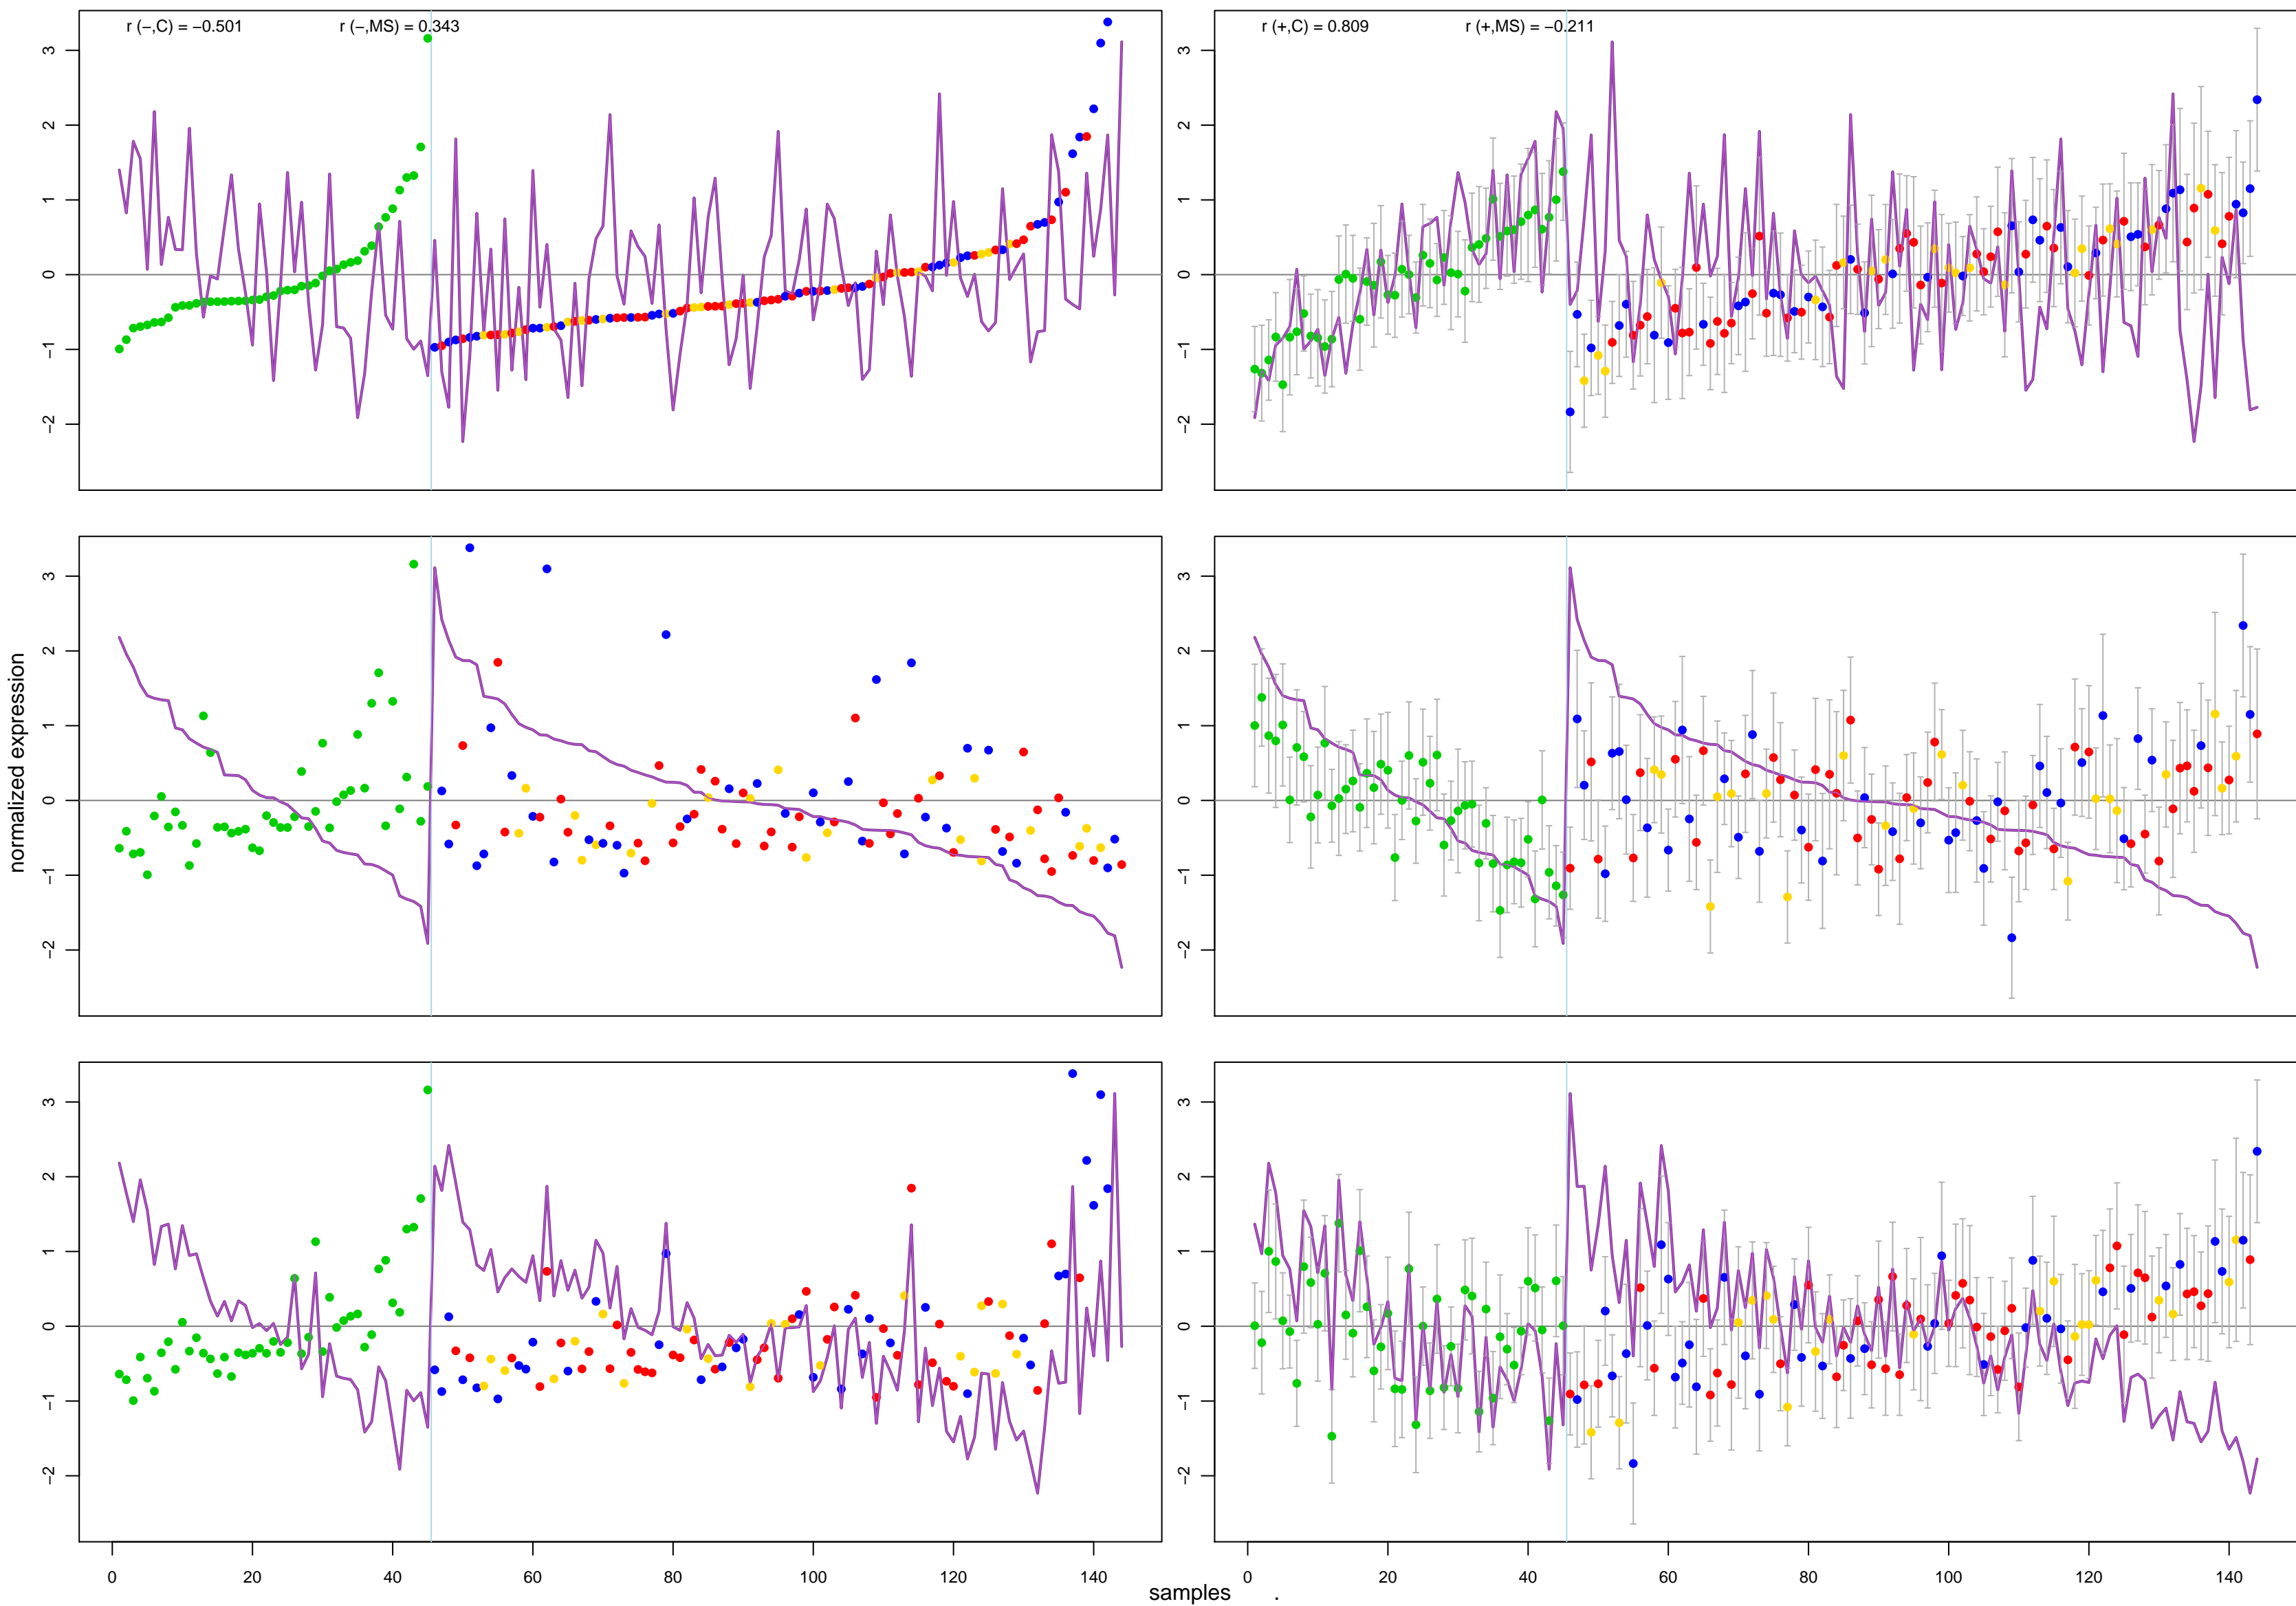

# MAP2K6

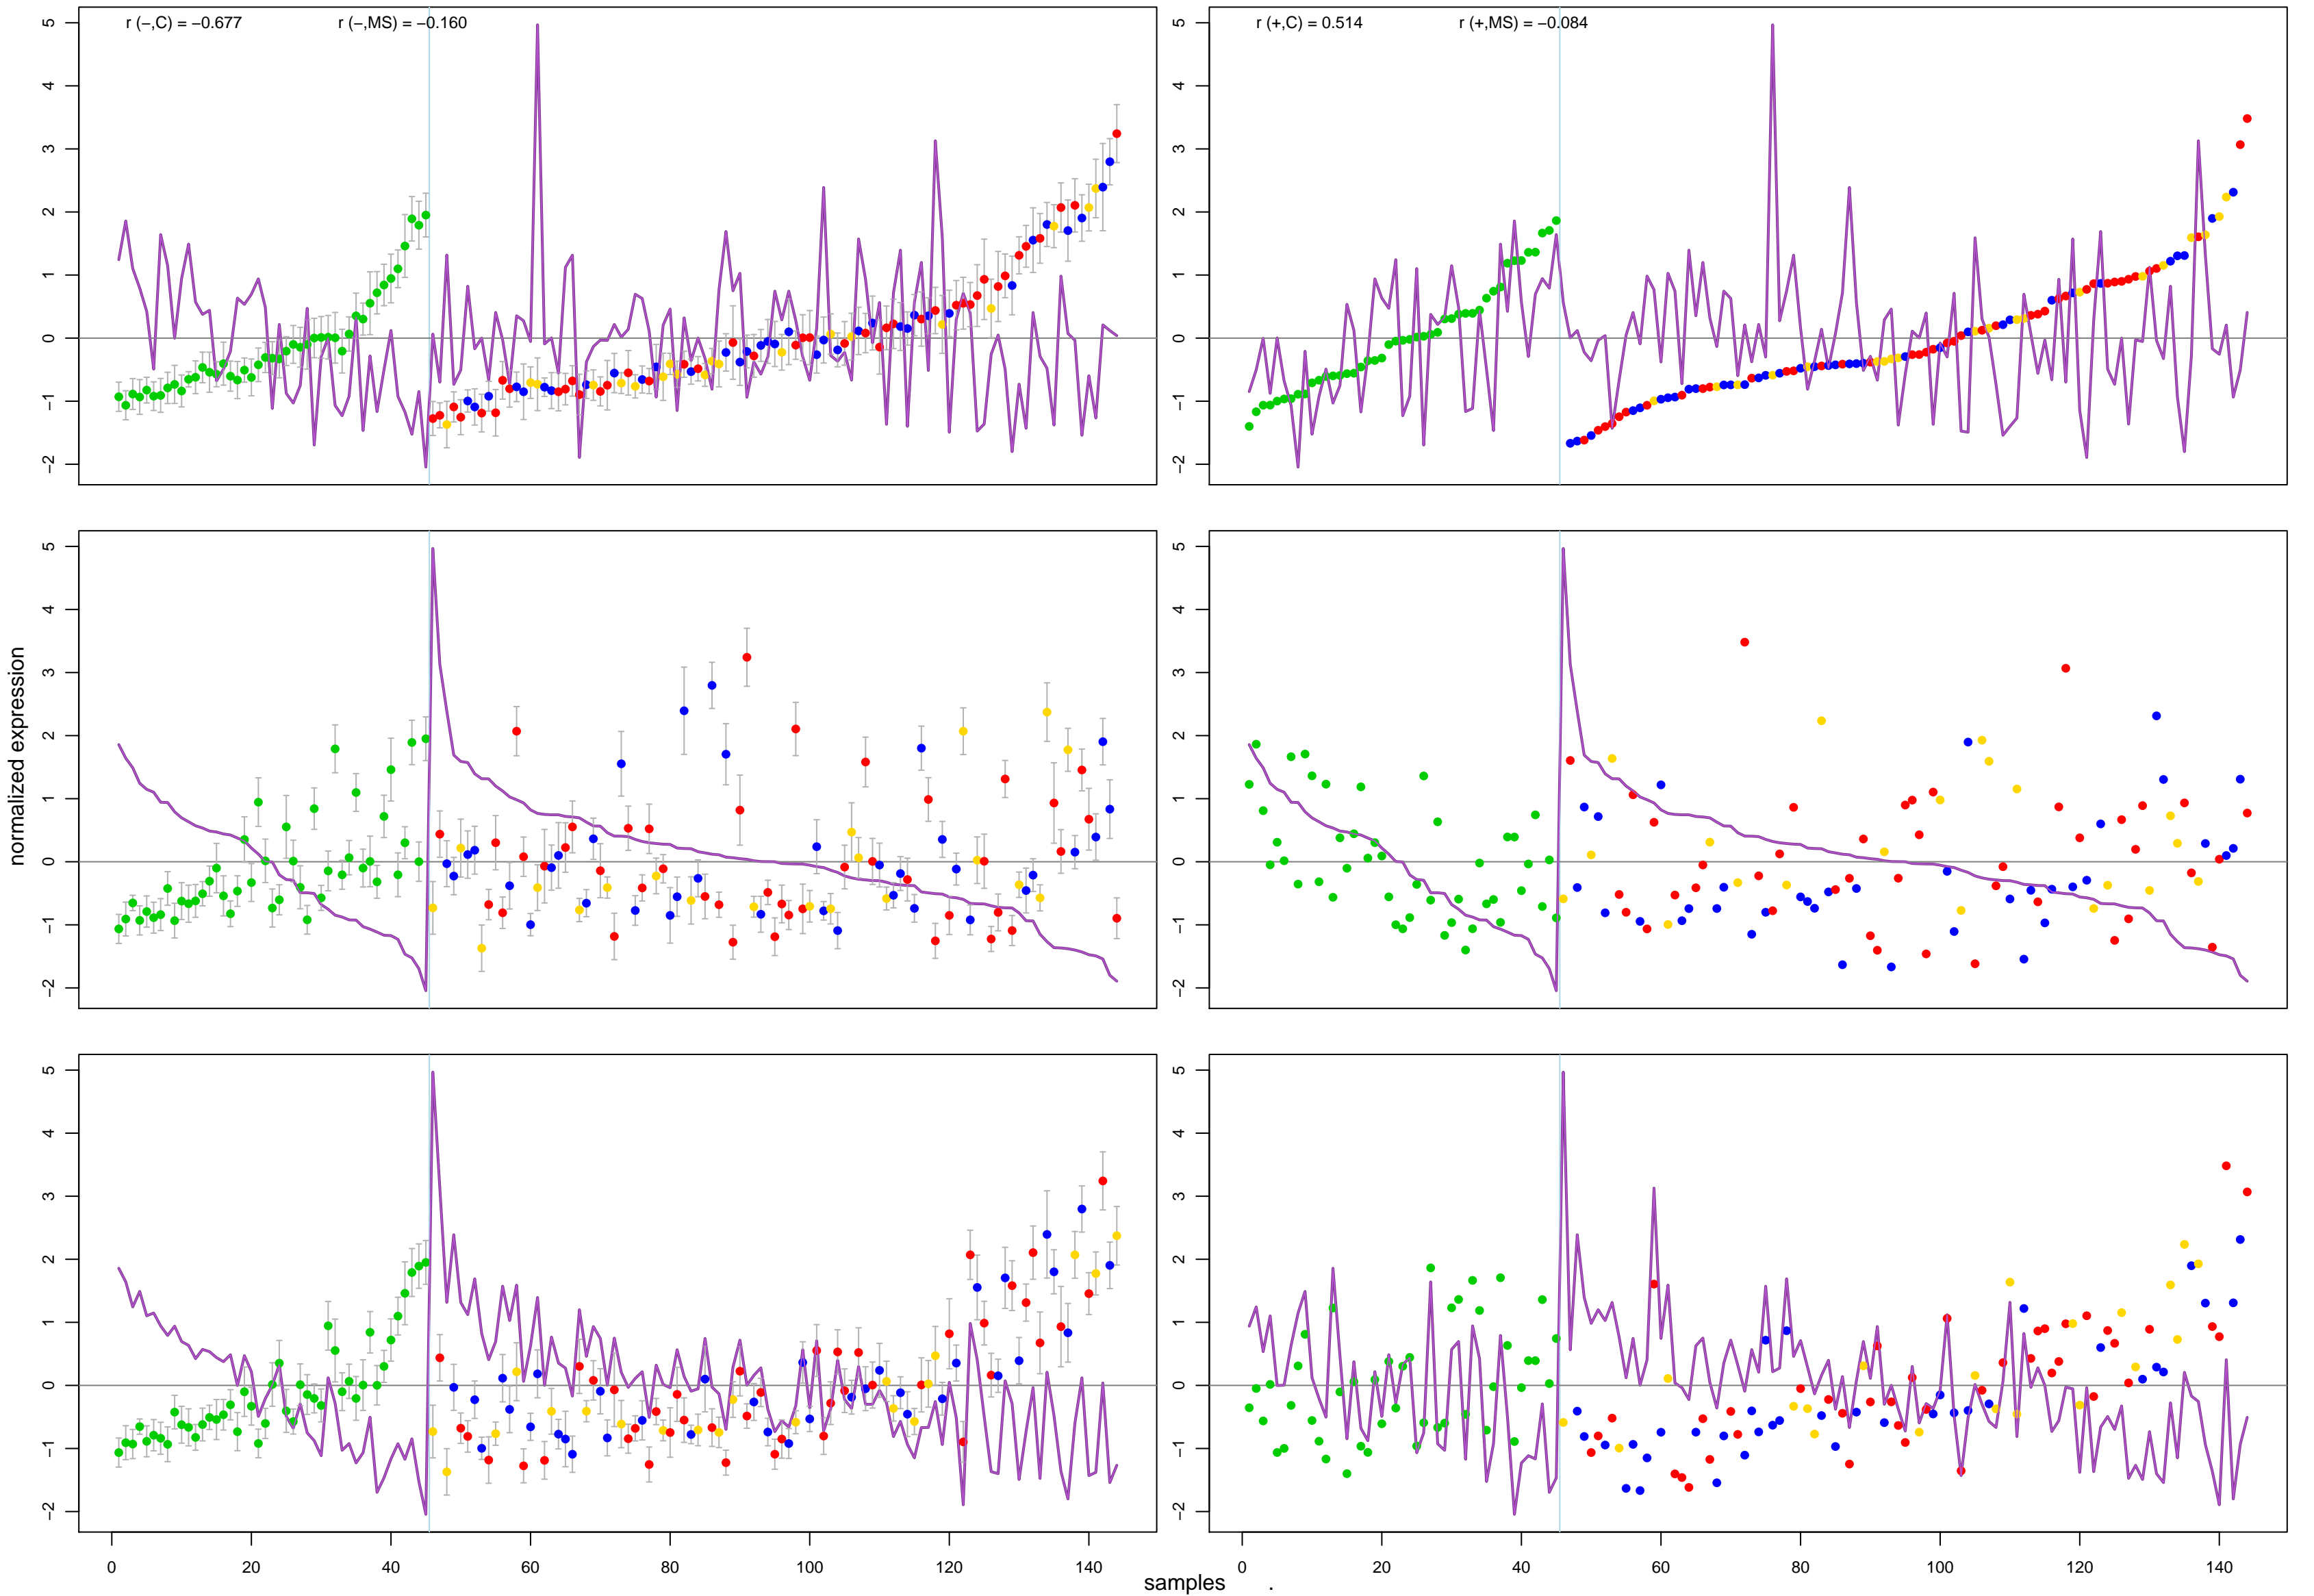

# MAPK3

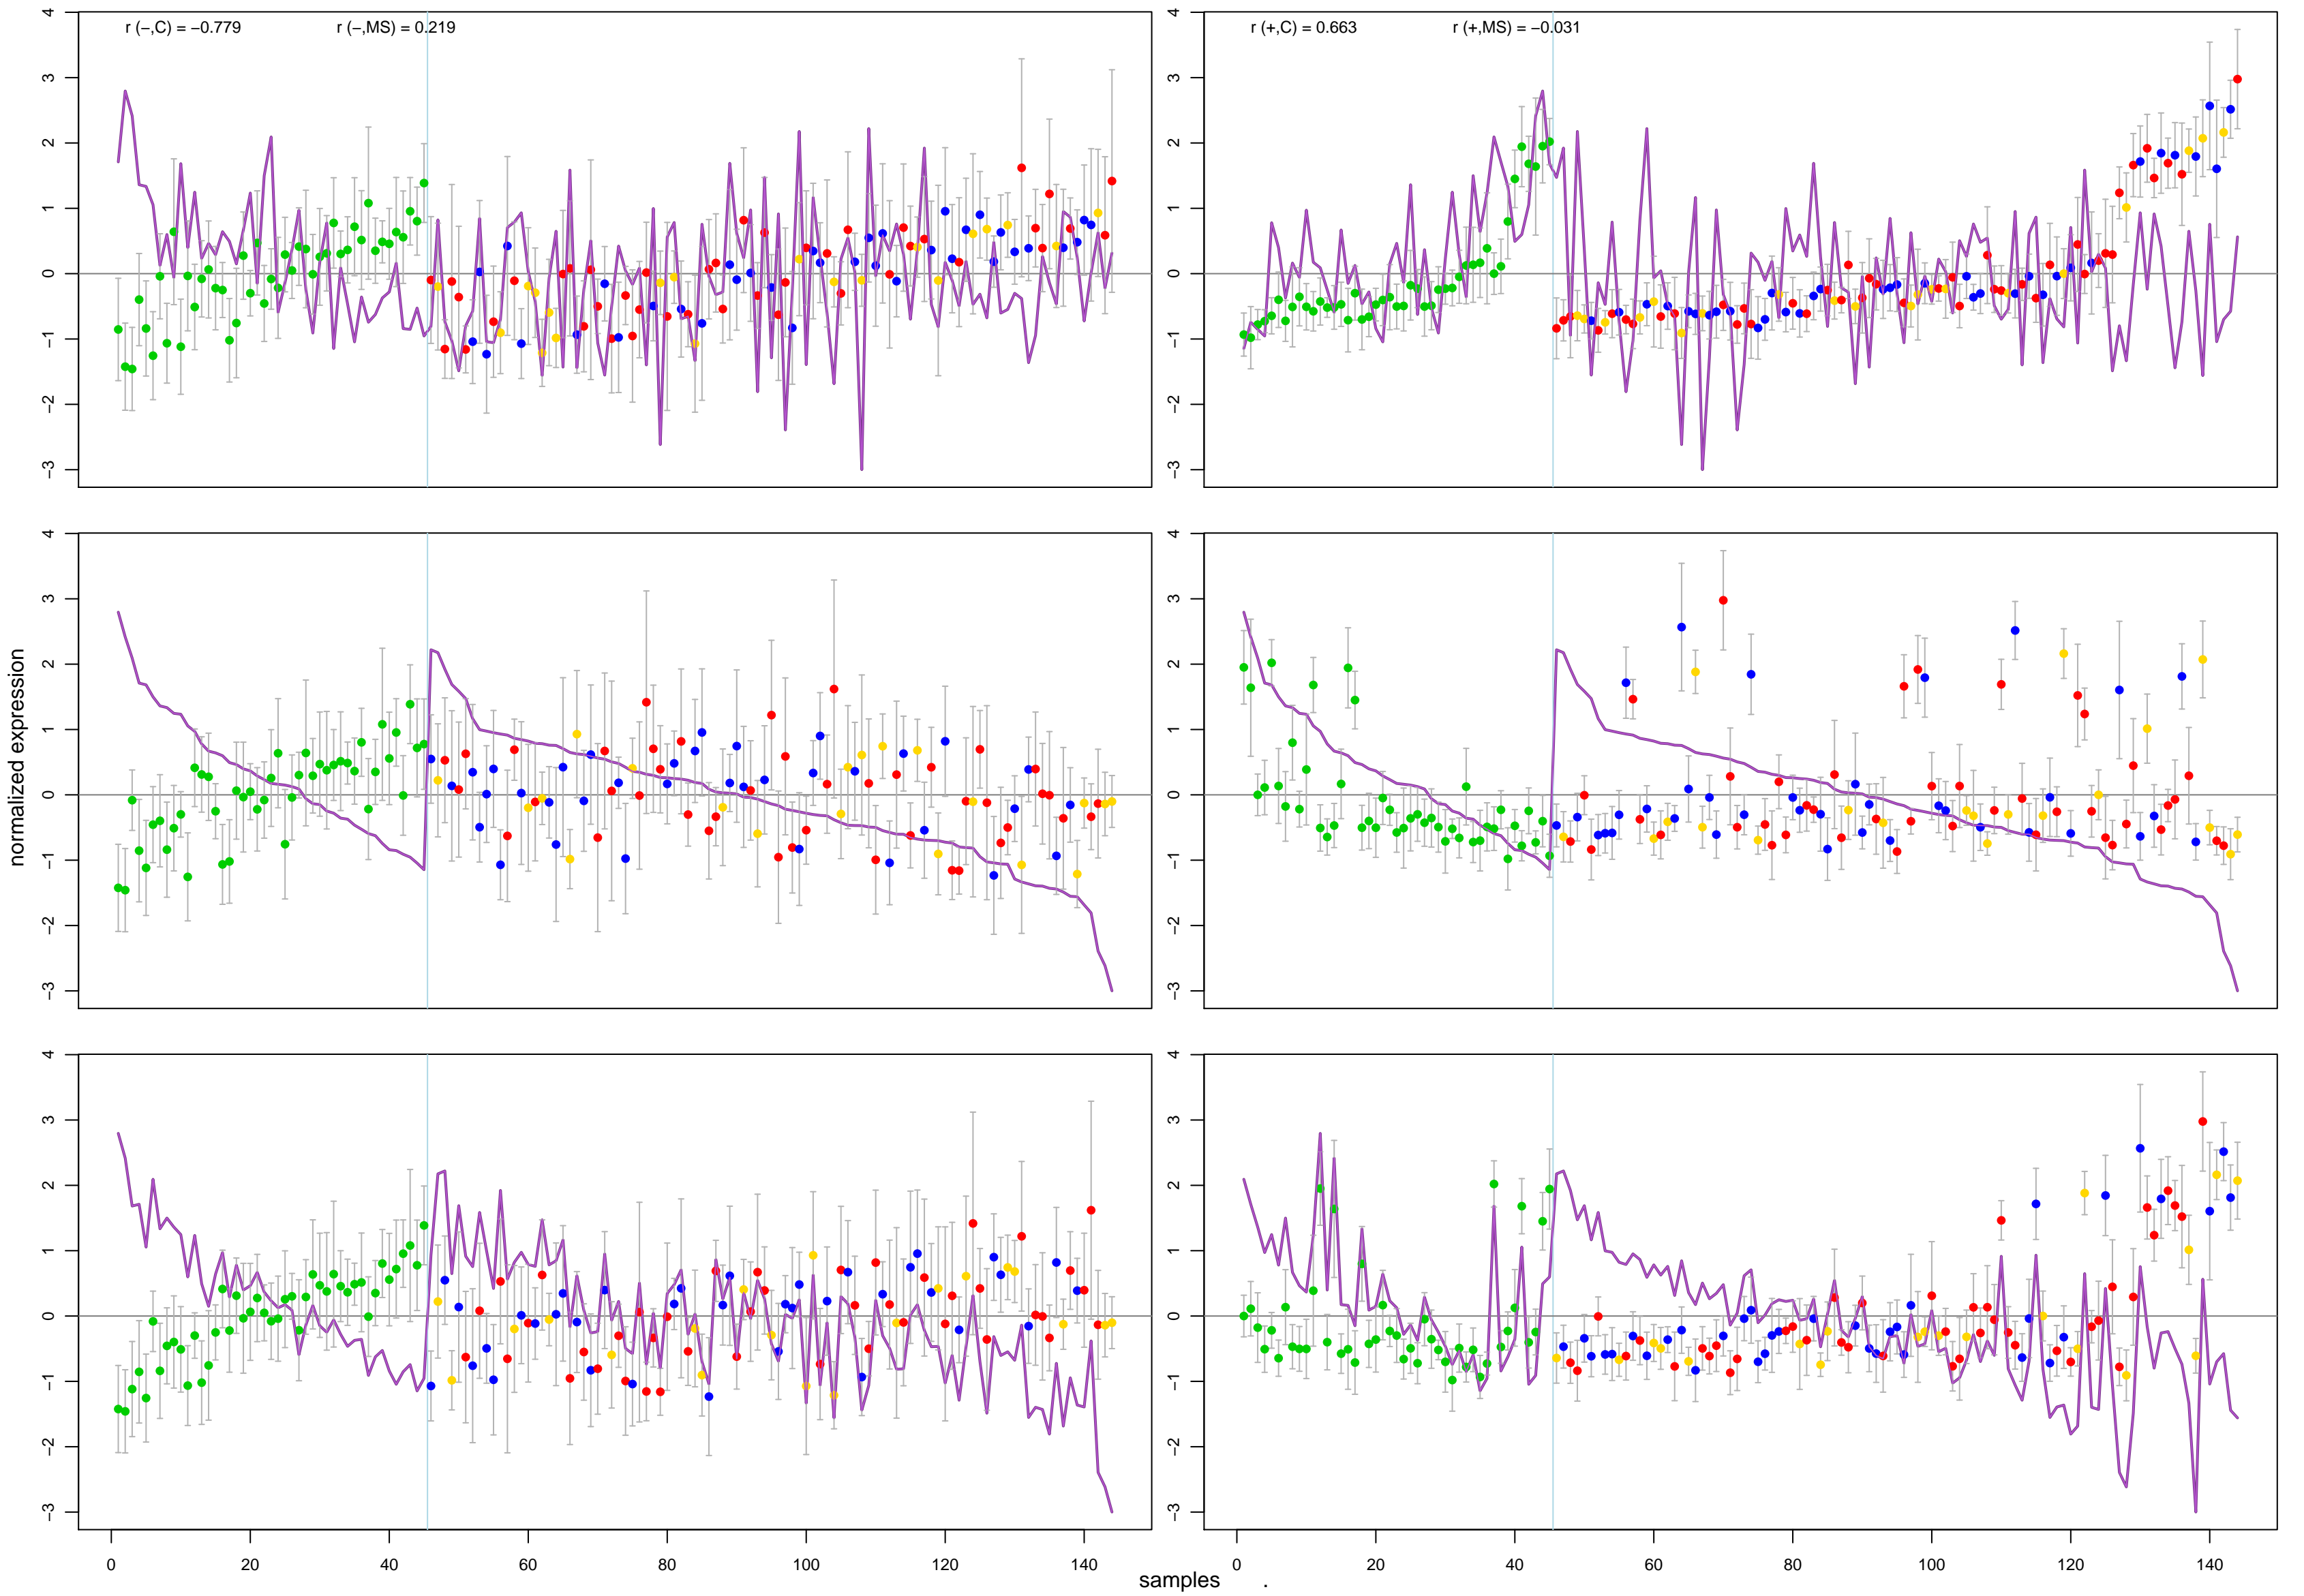

# MLKL

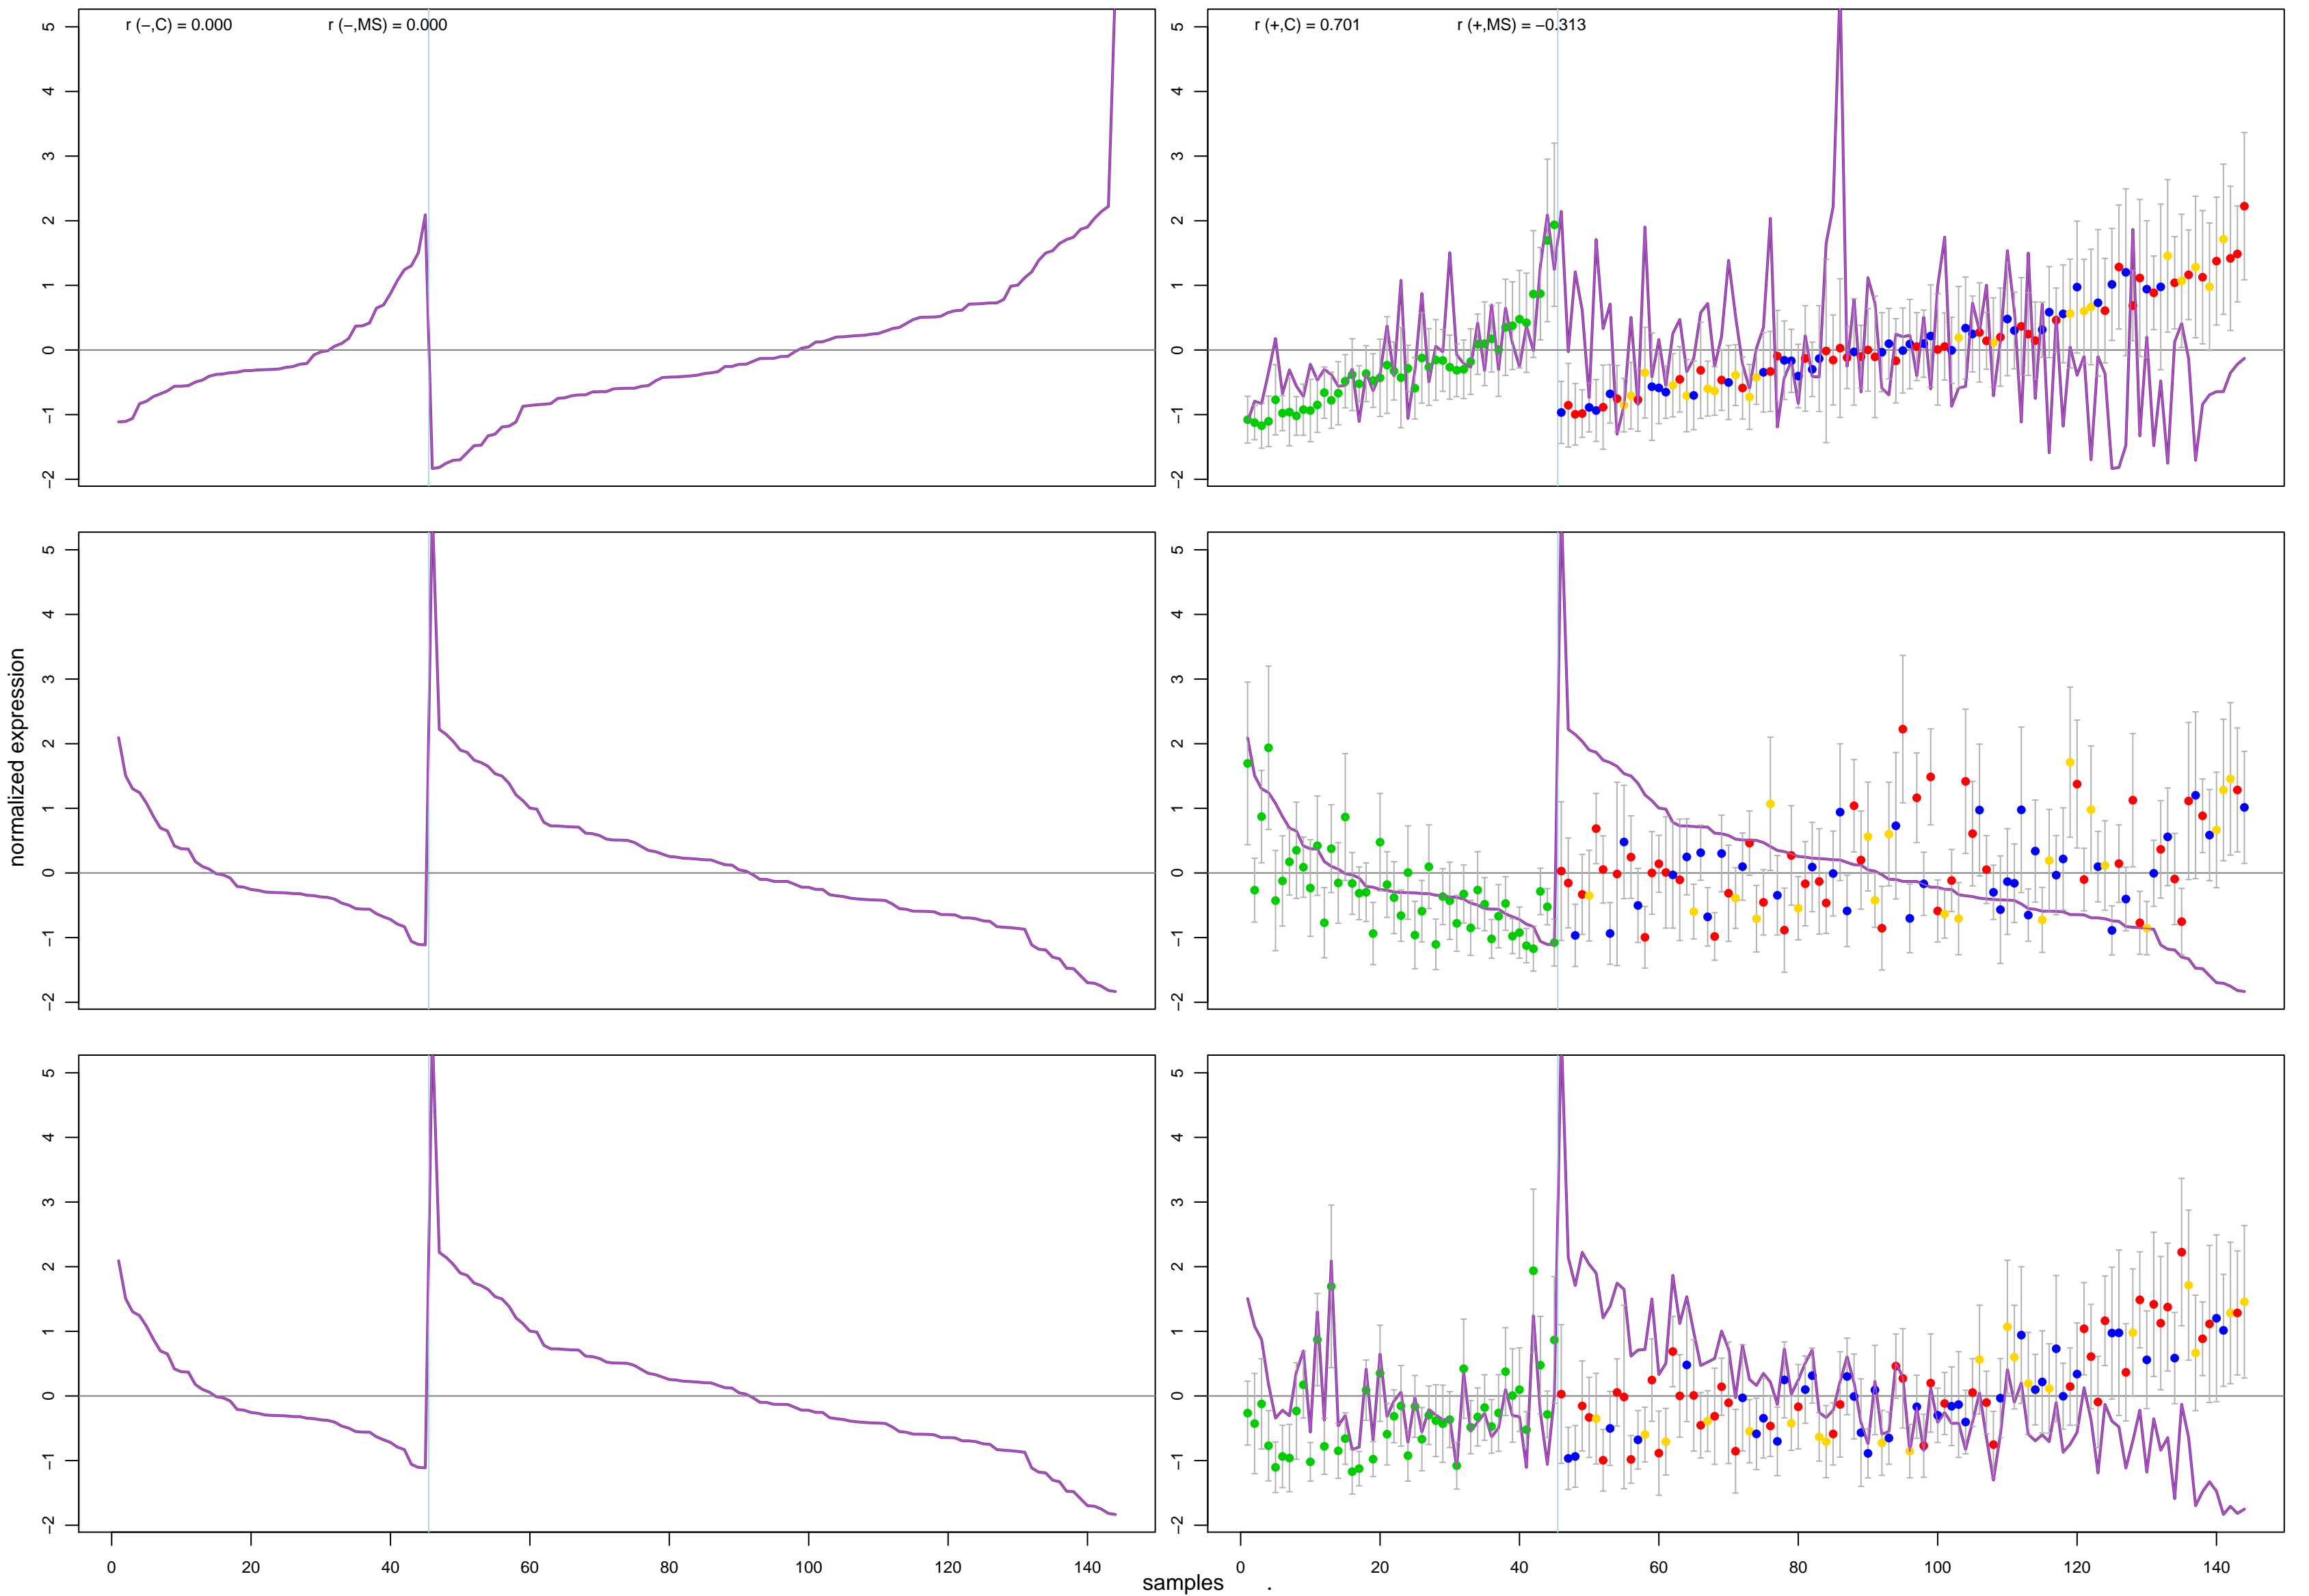



# POM121

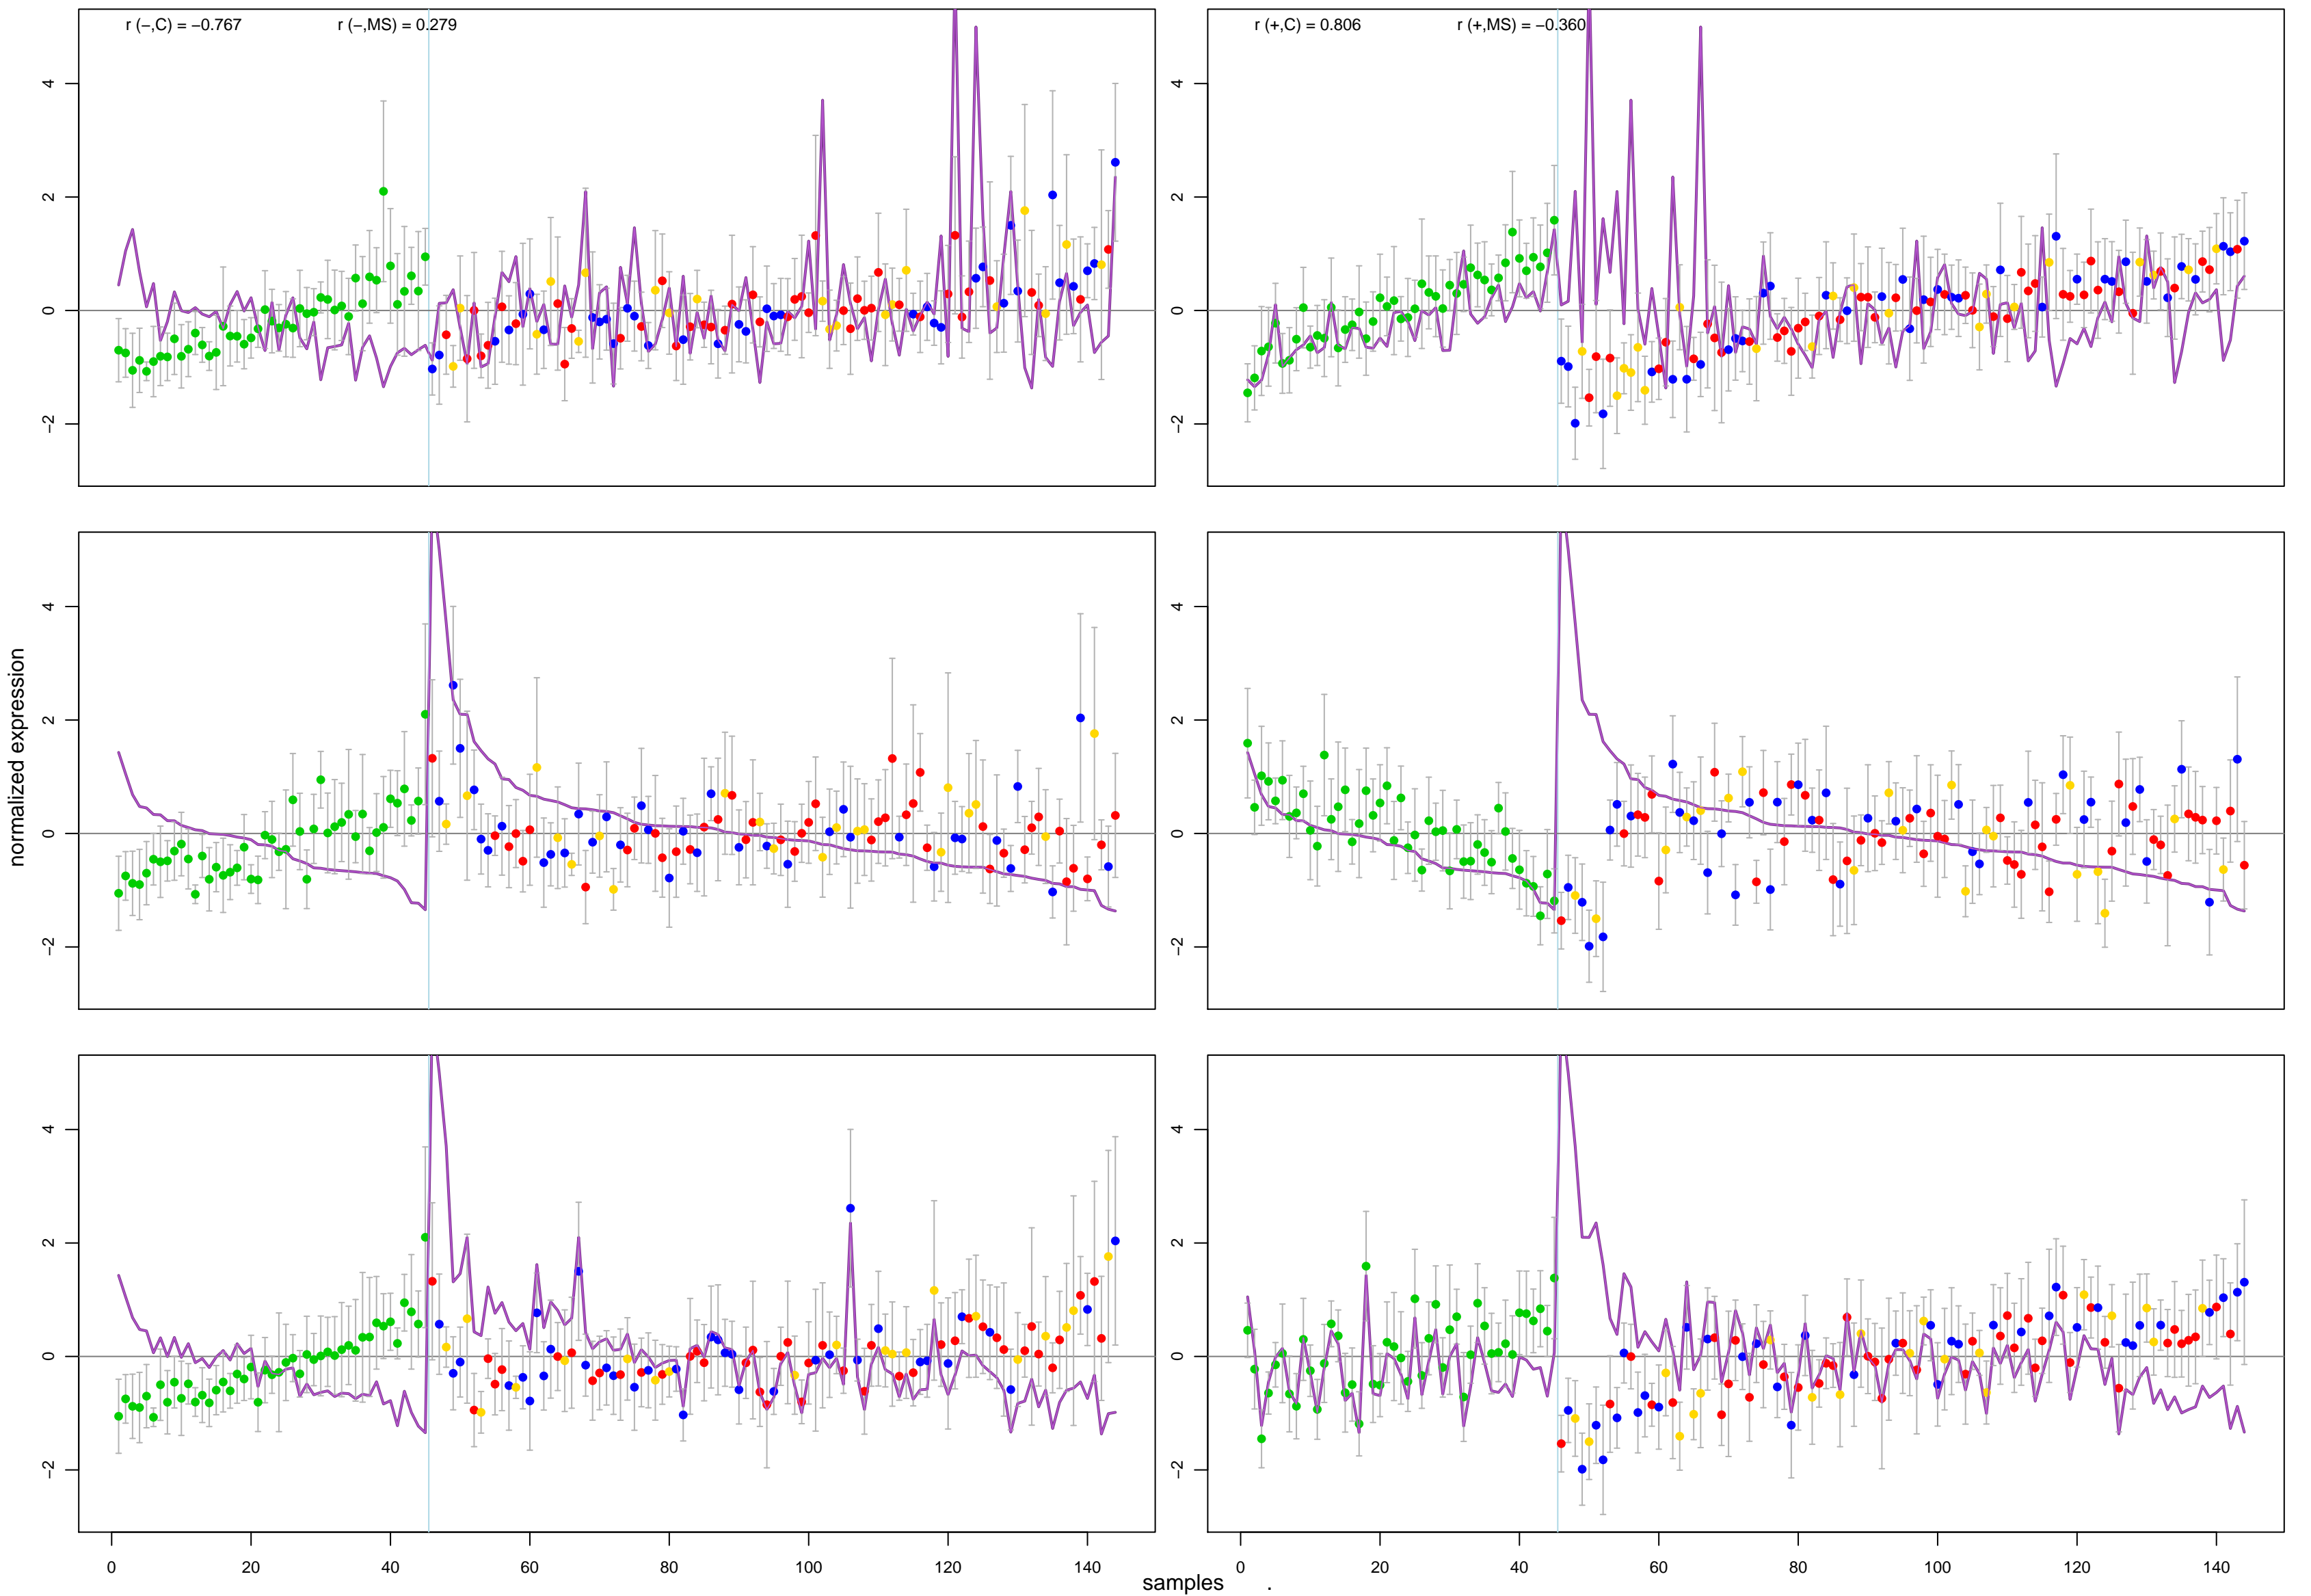

# PTPRN

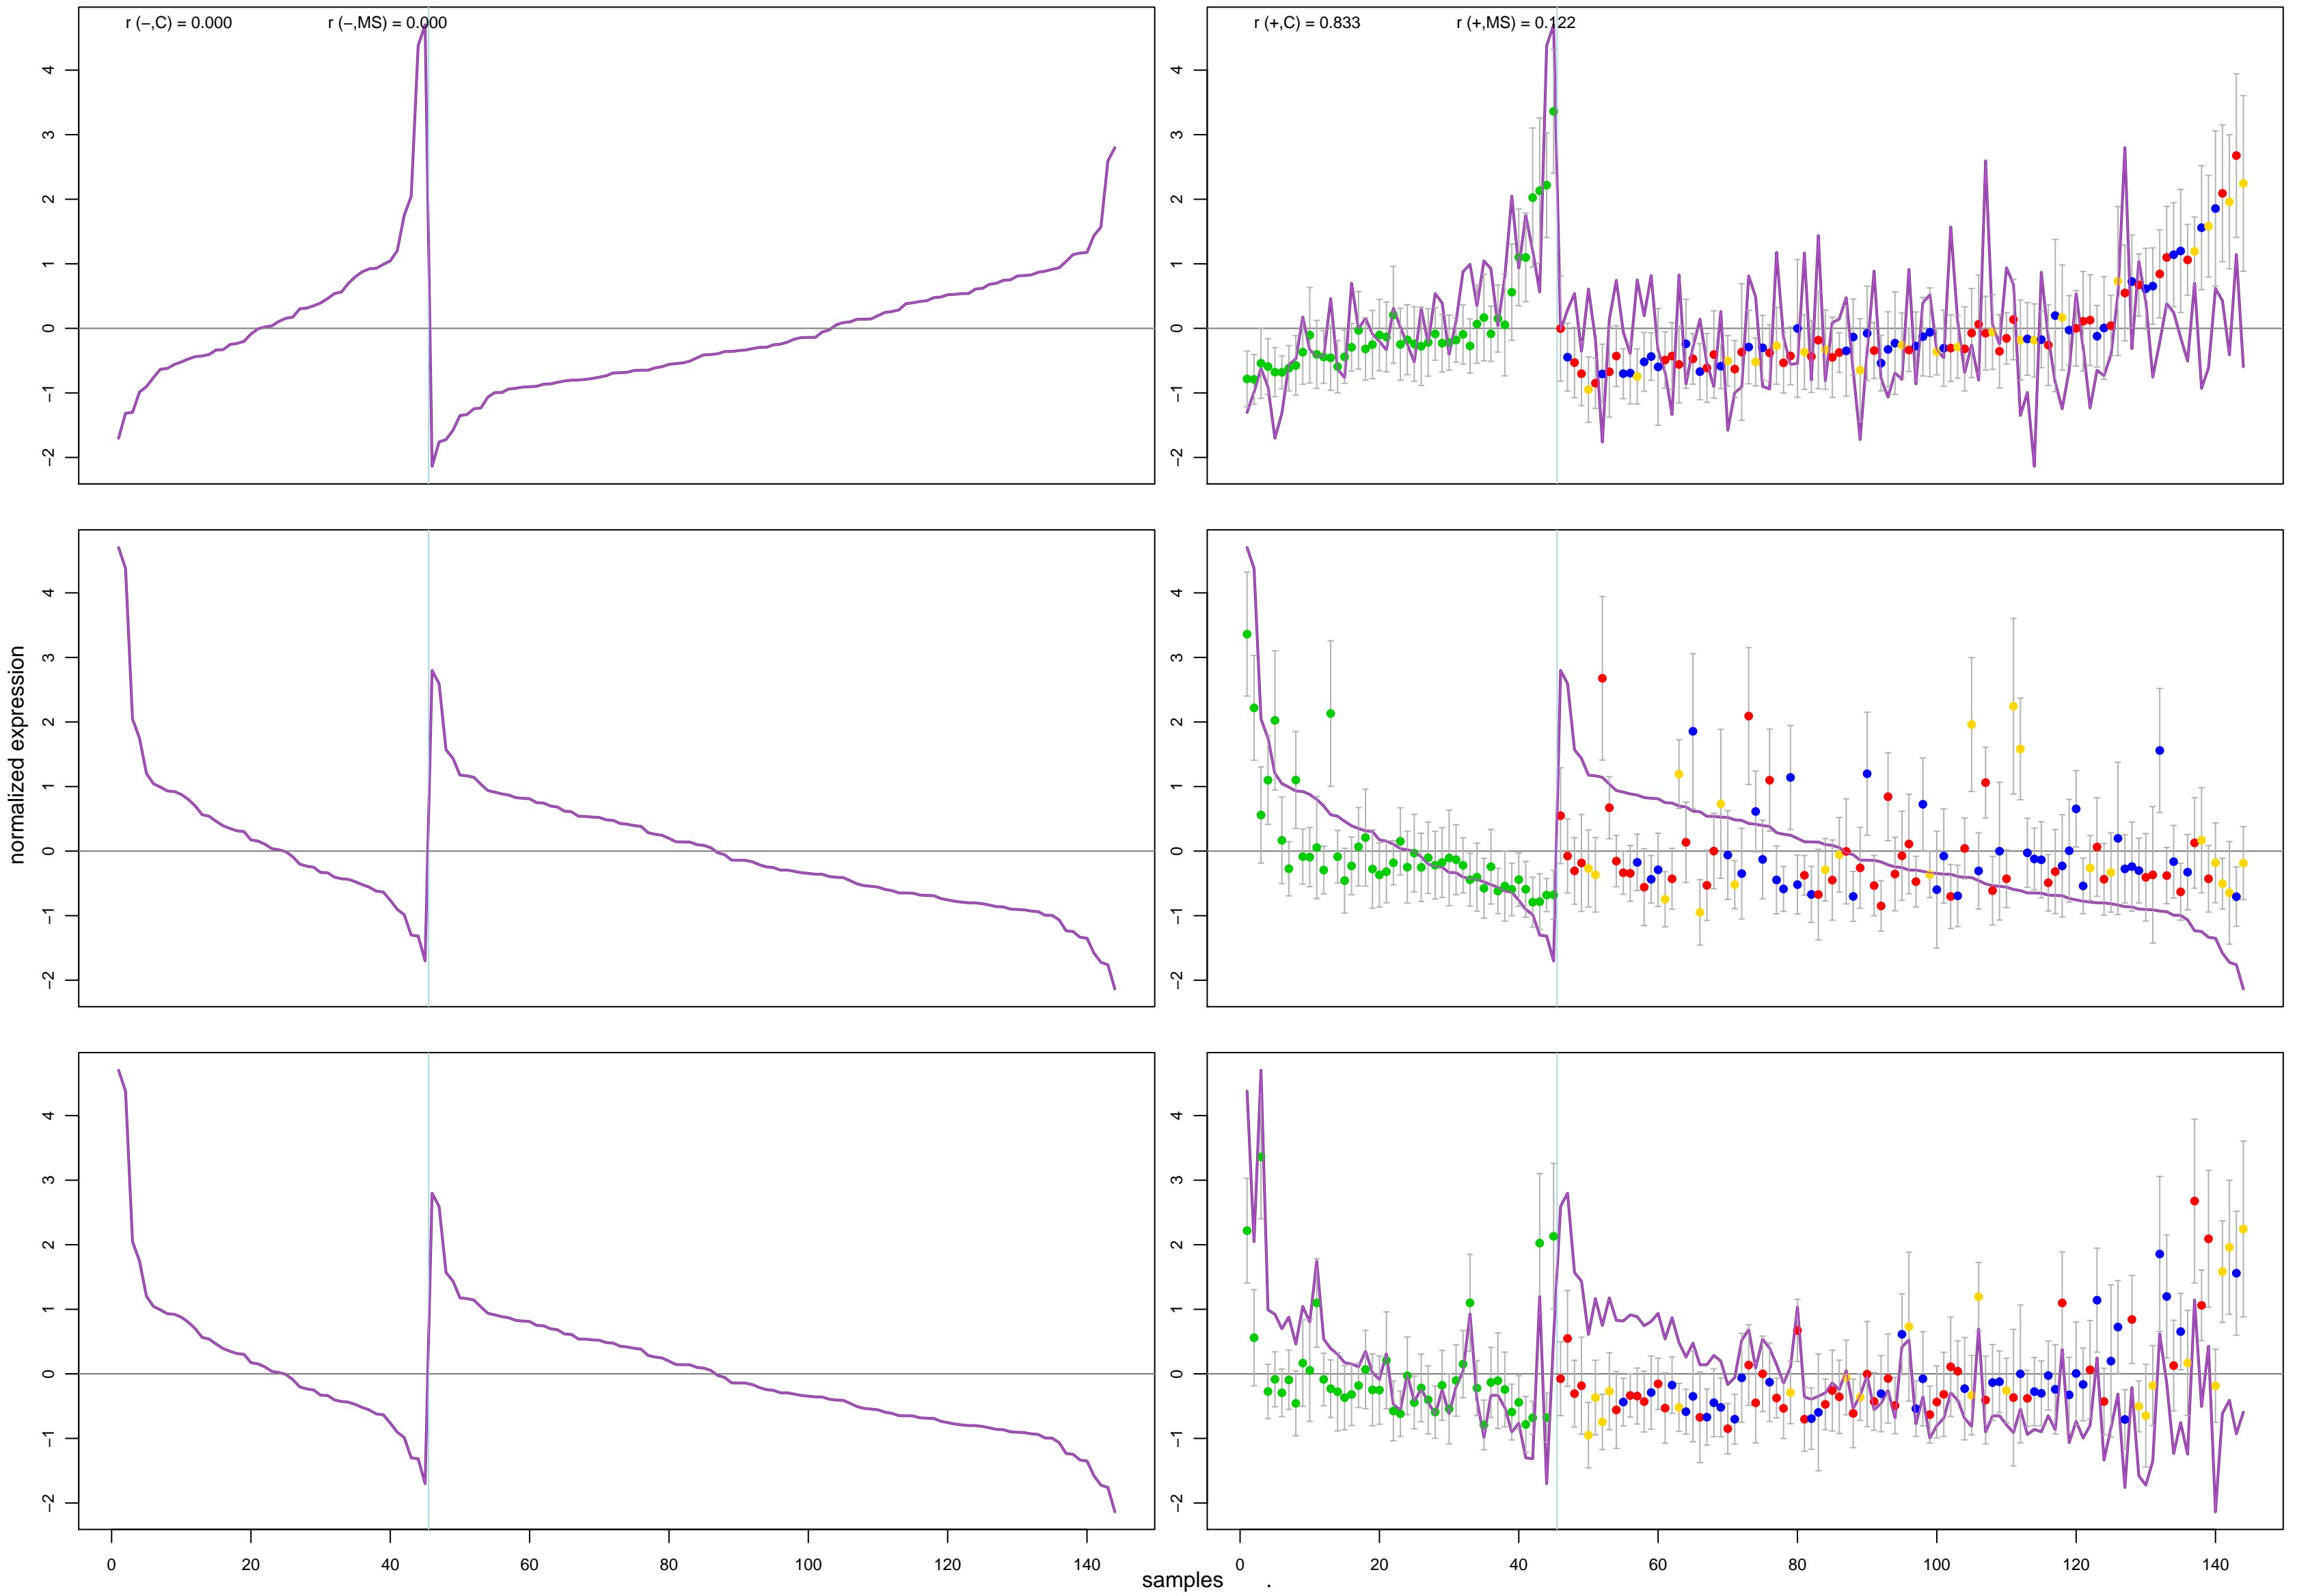

# RAB13

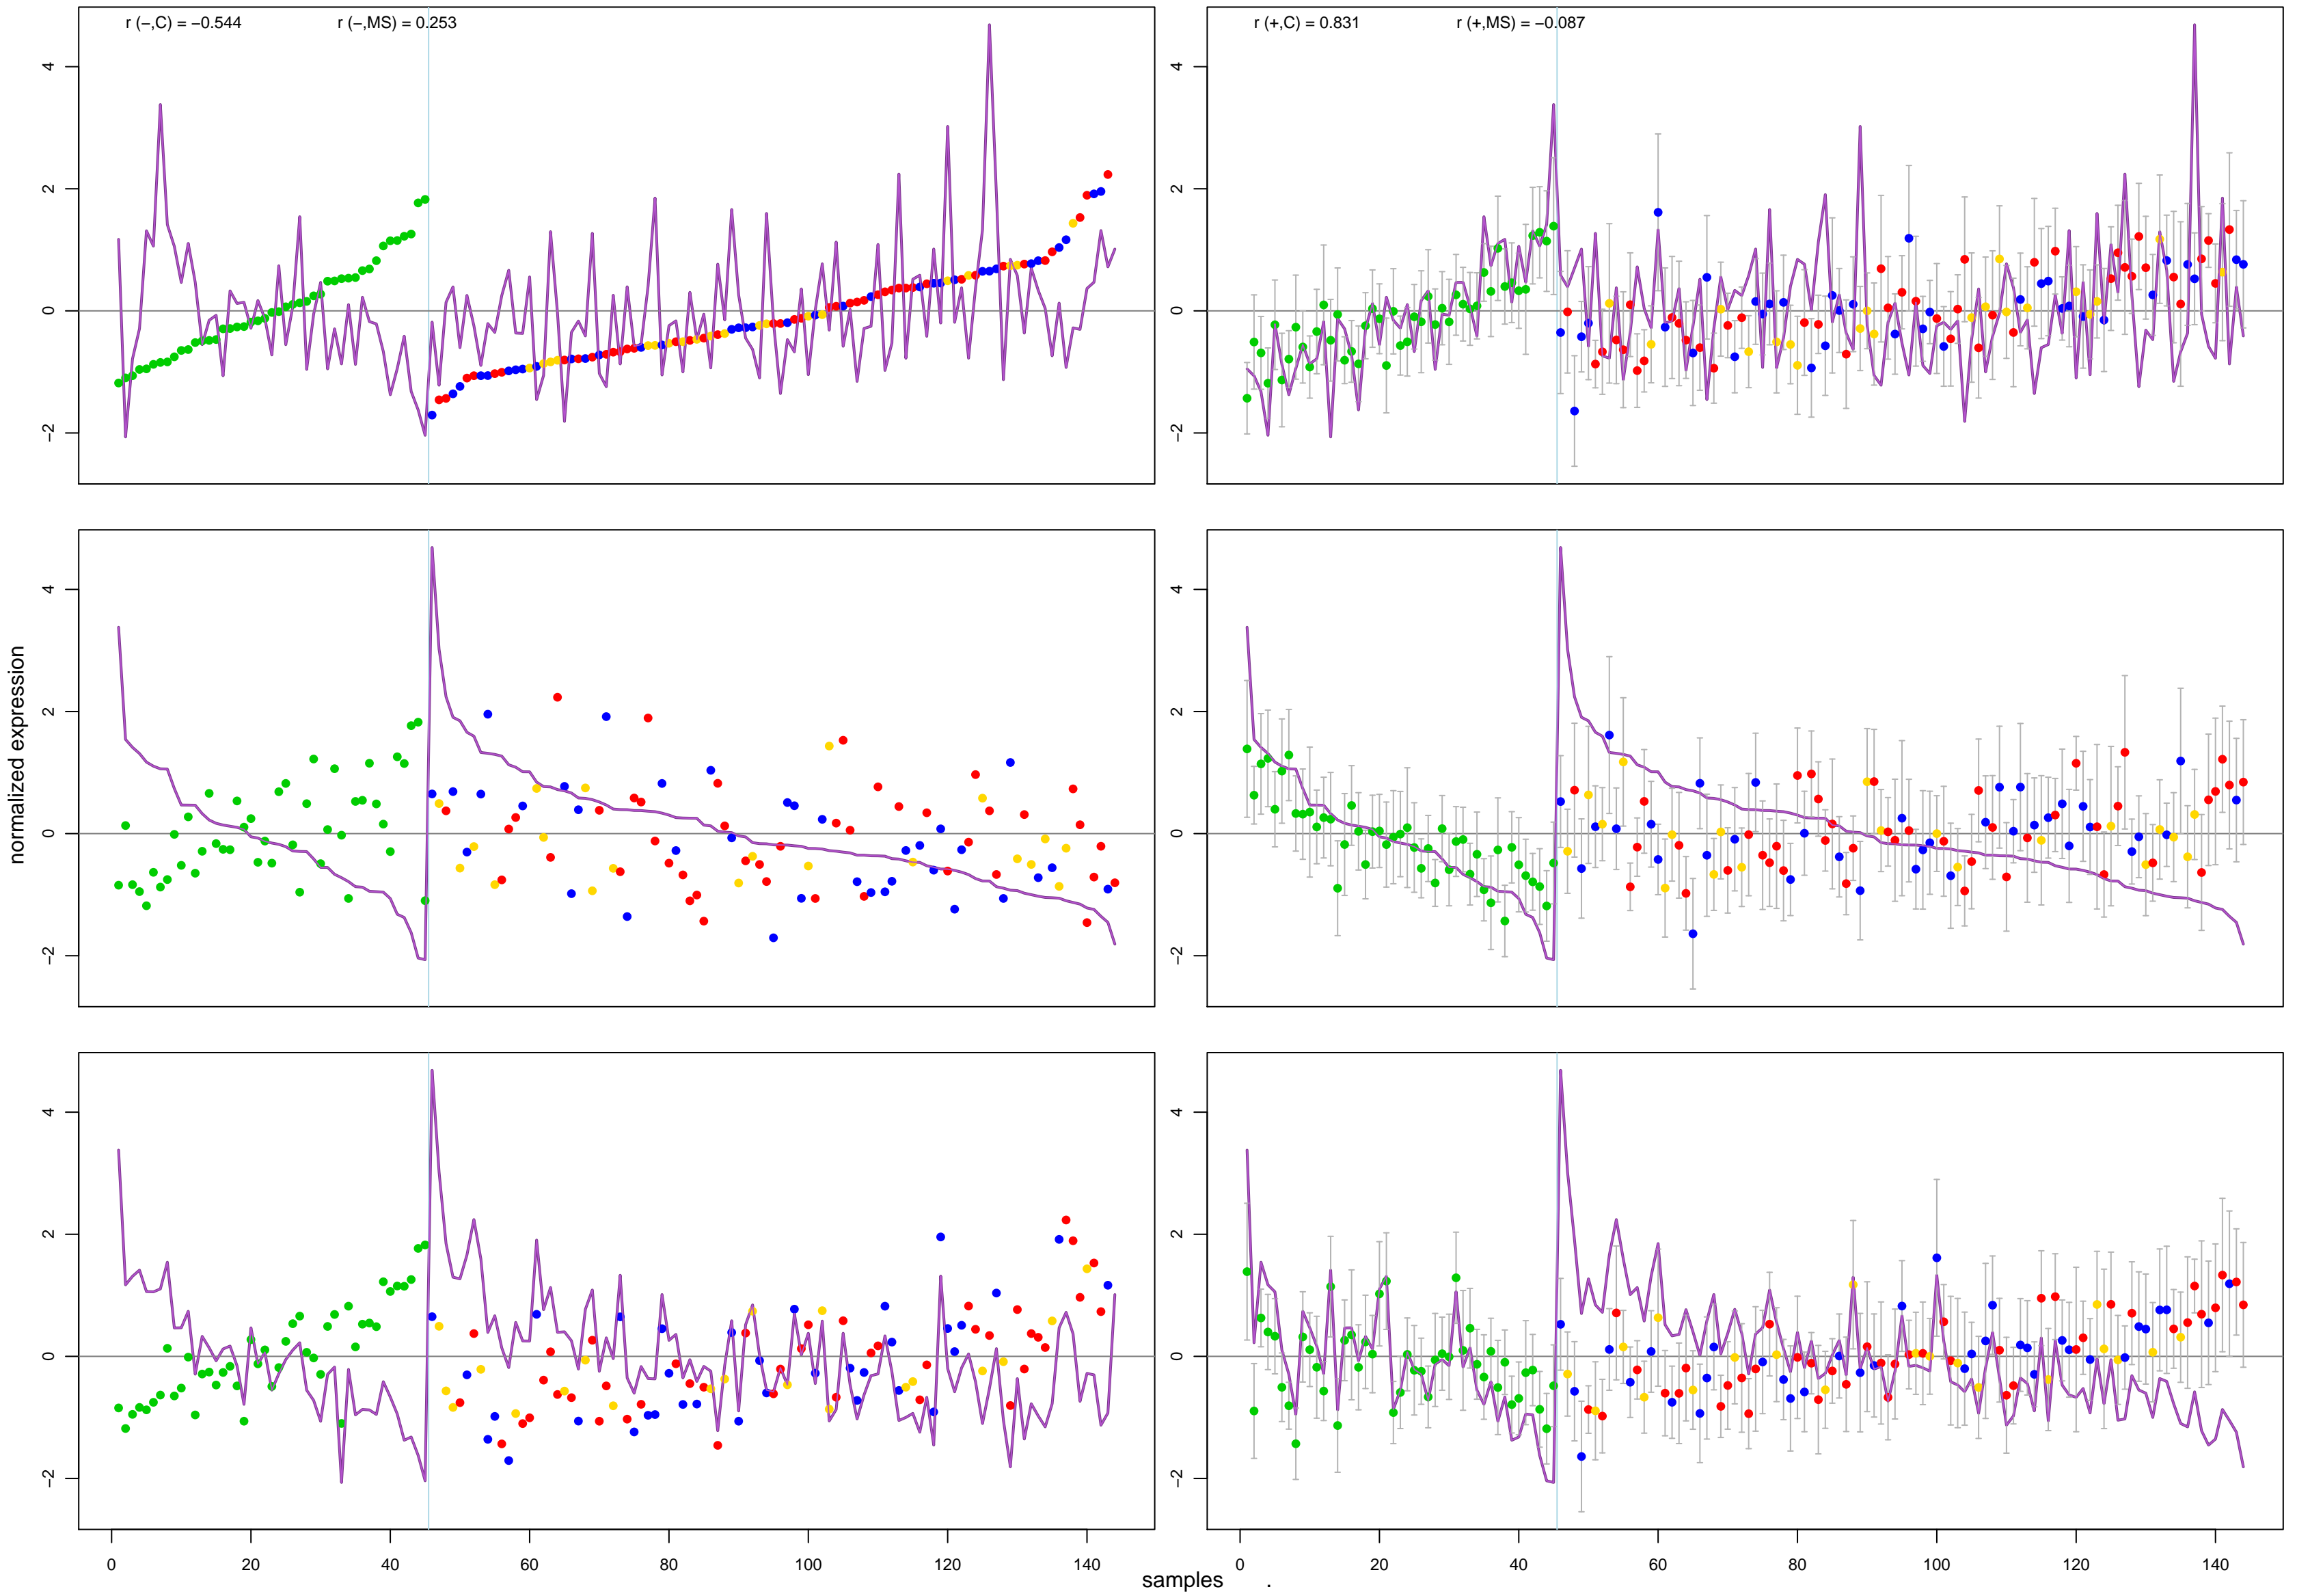

RP1L1

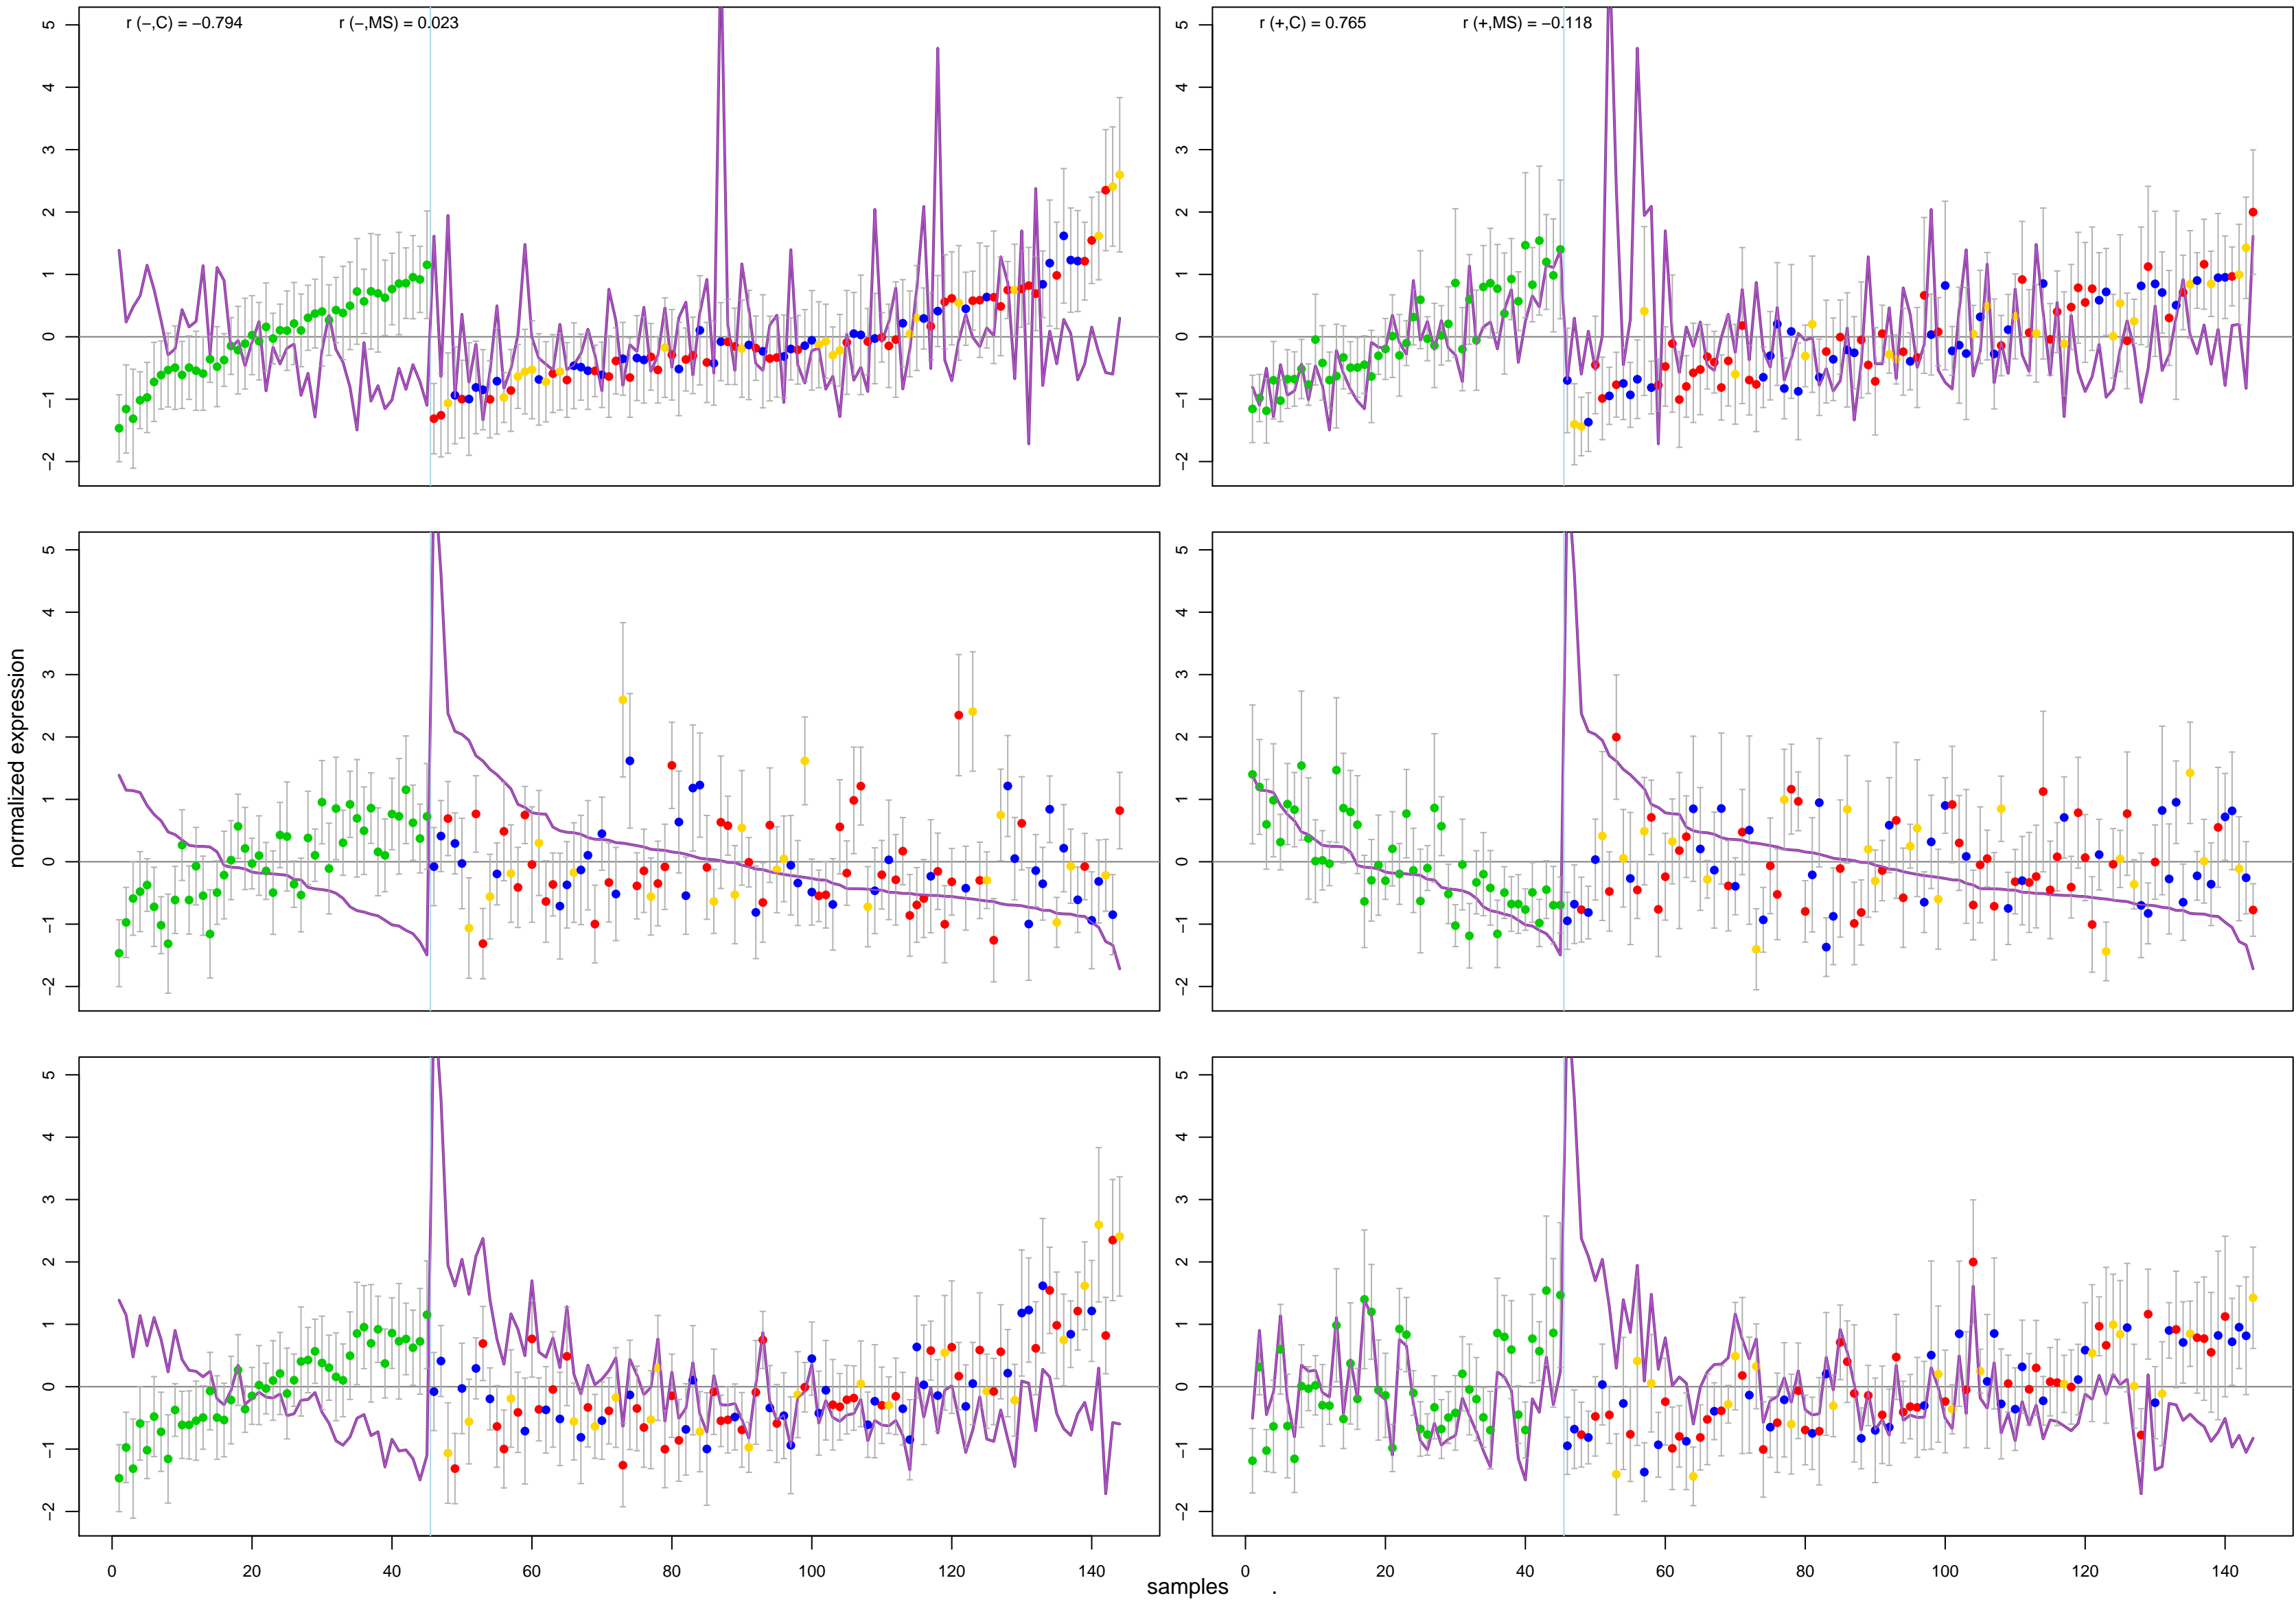



SHROOM4

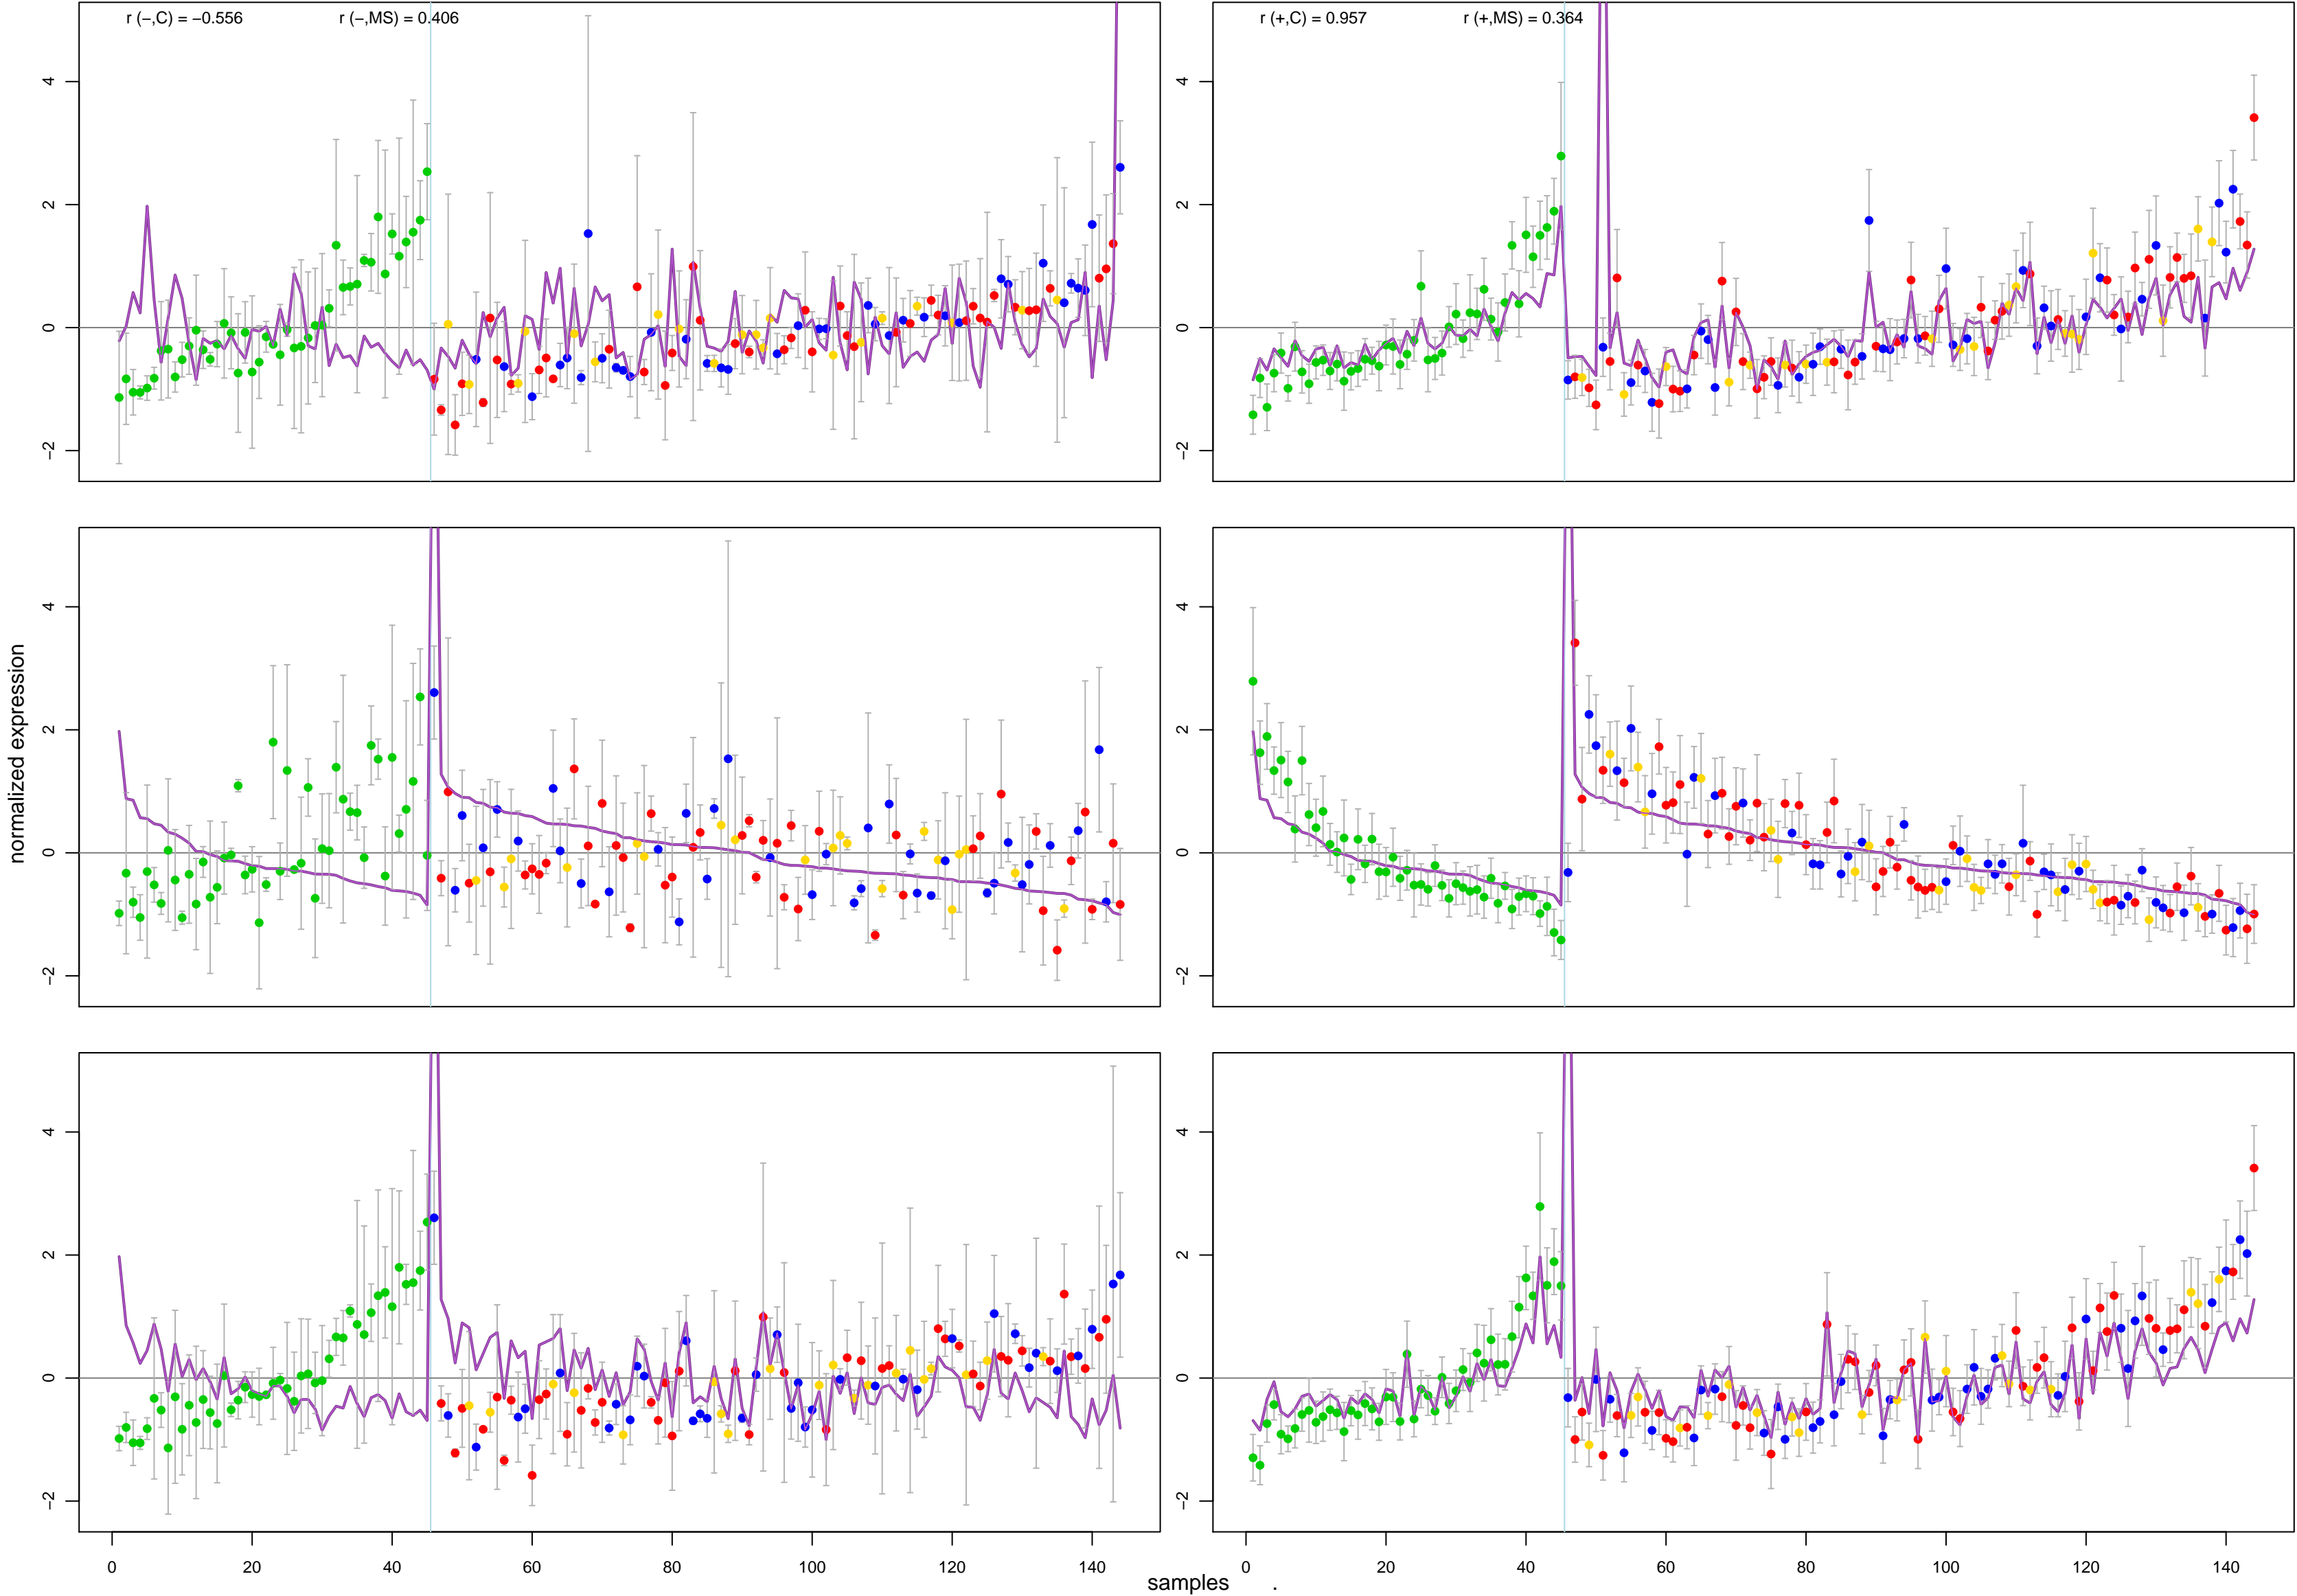

# SPCS1

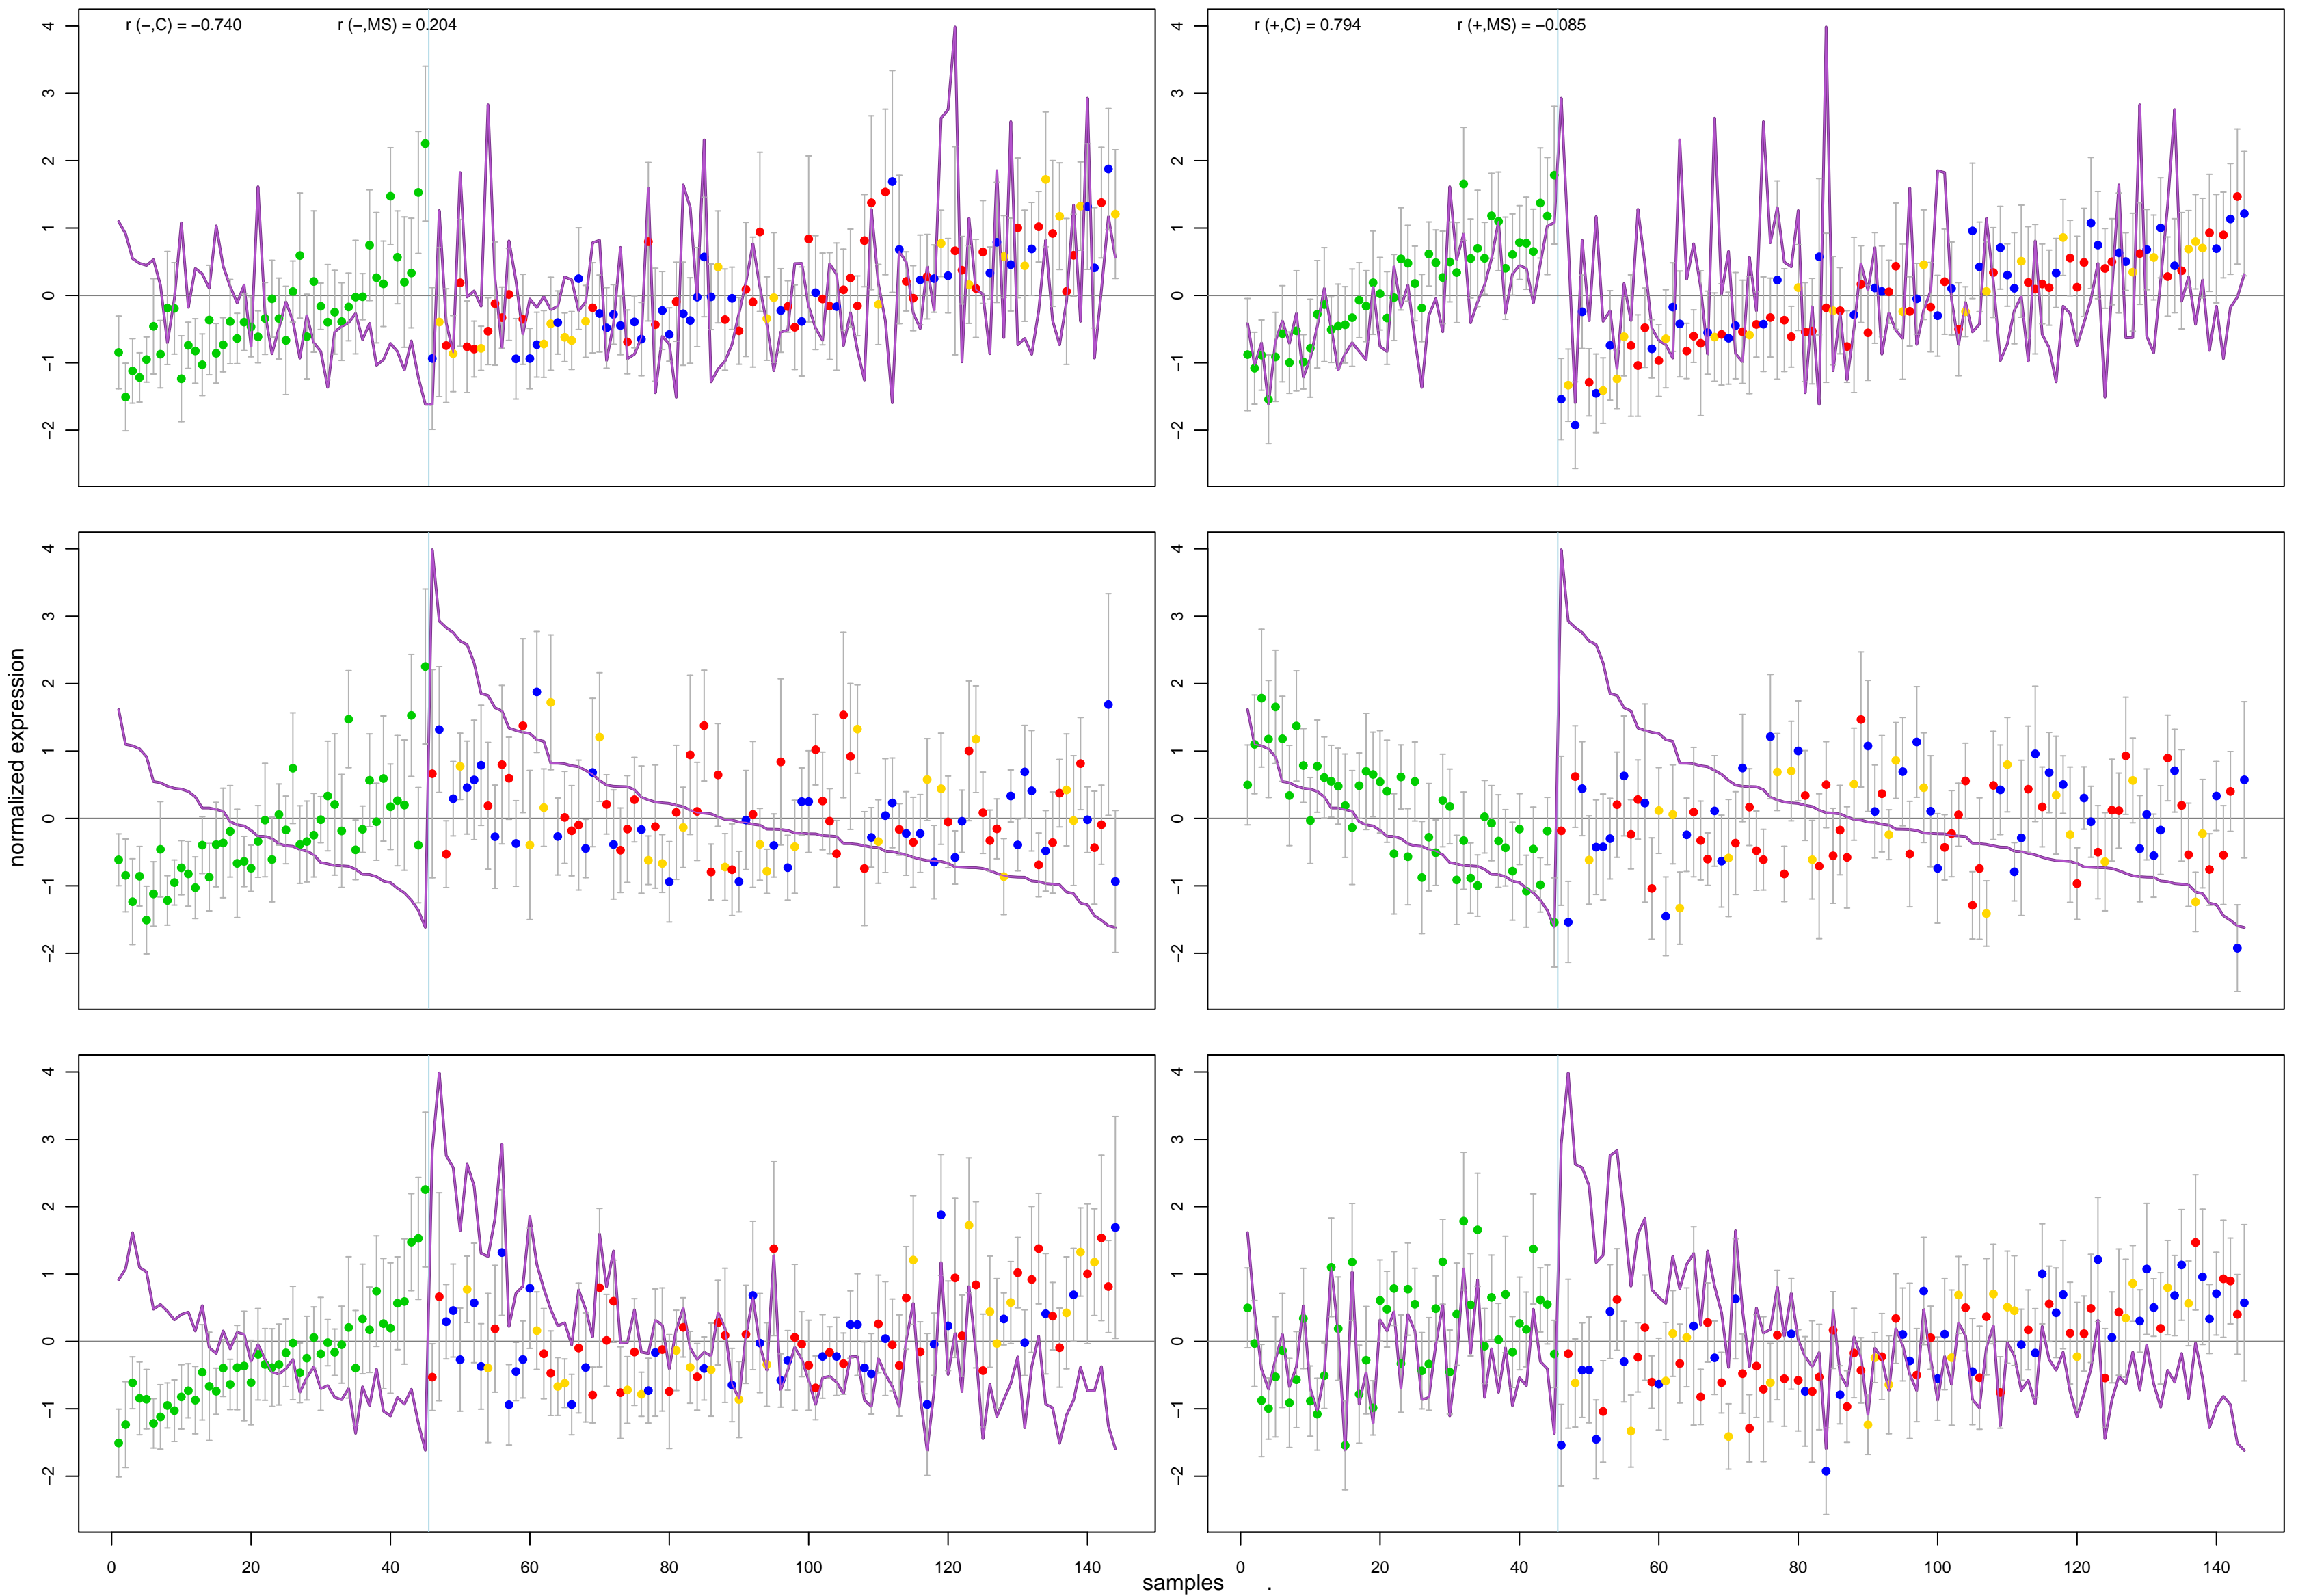

WHSC1L1

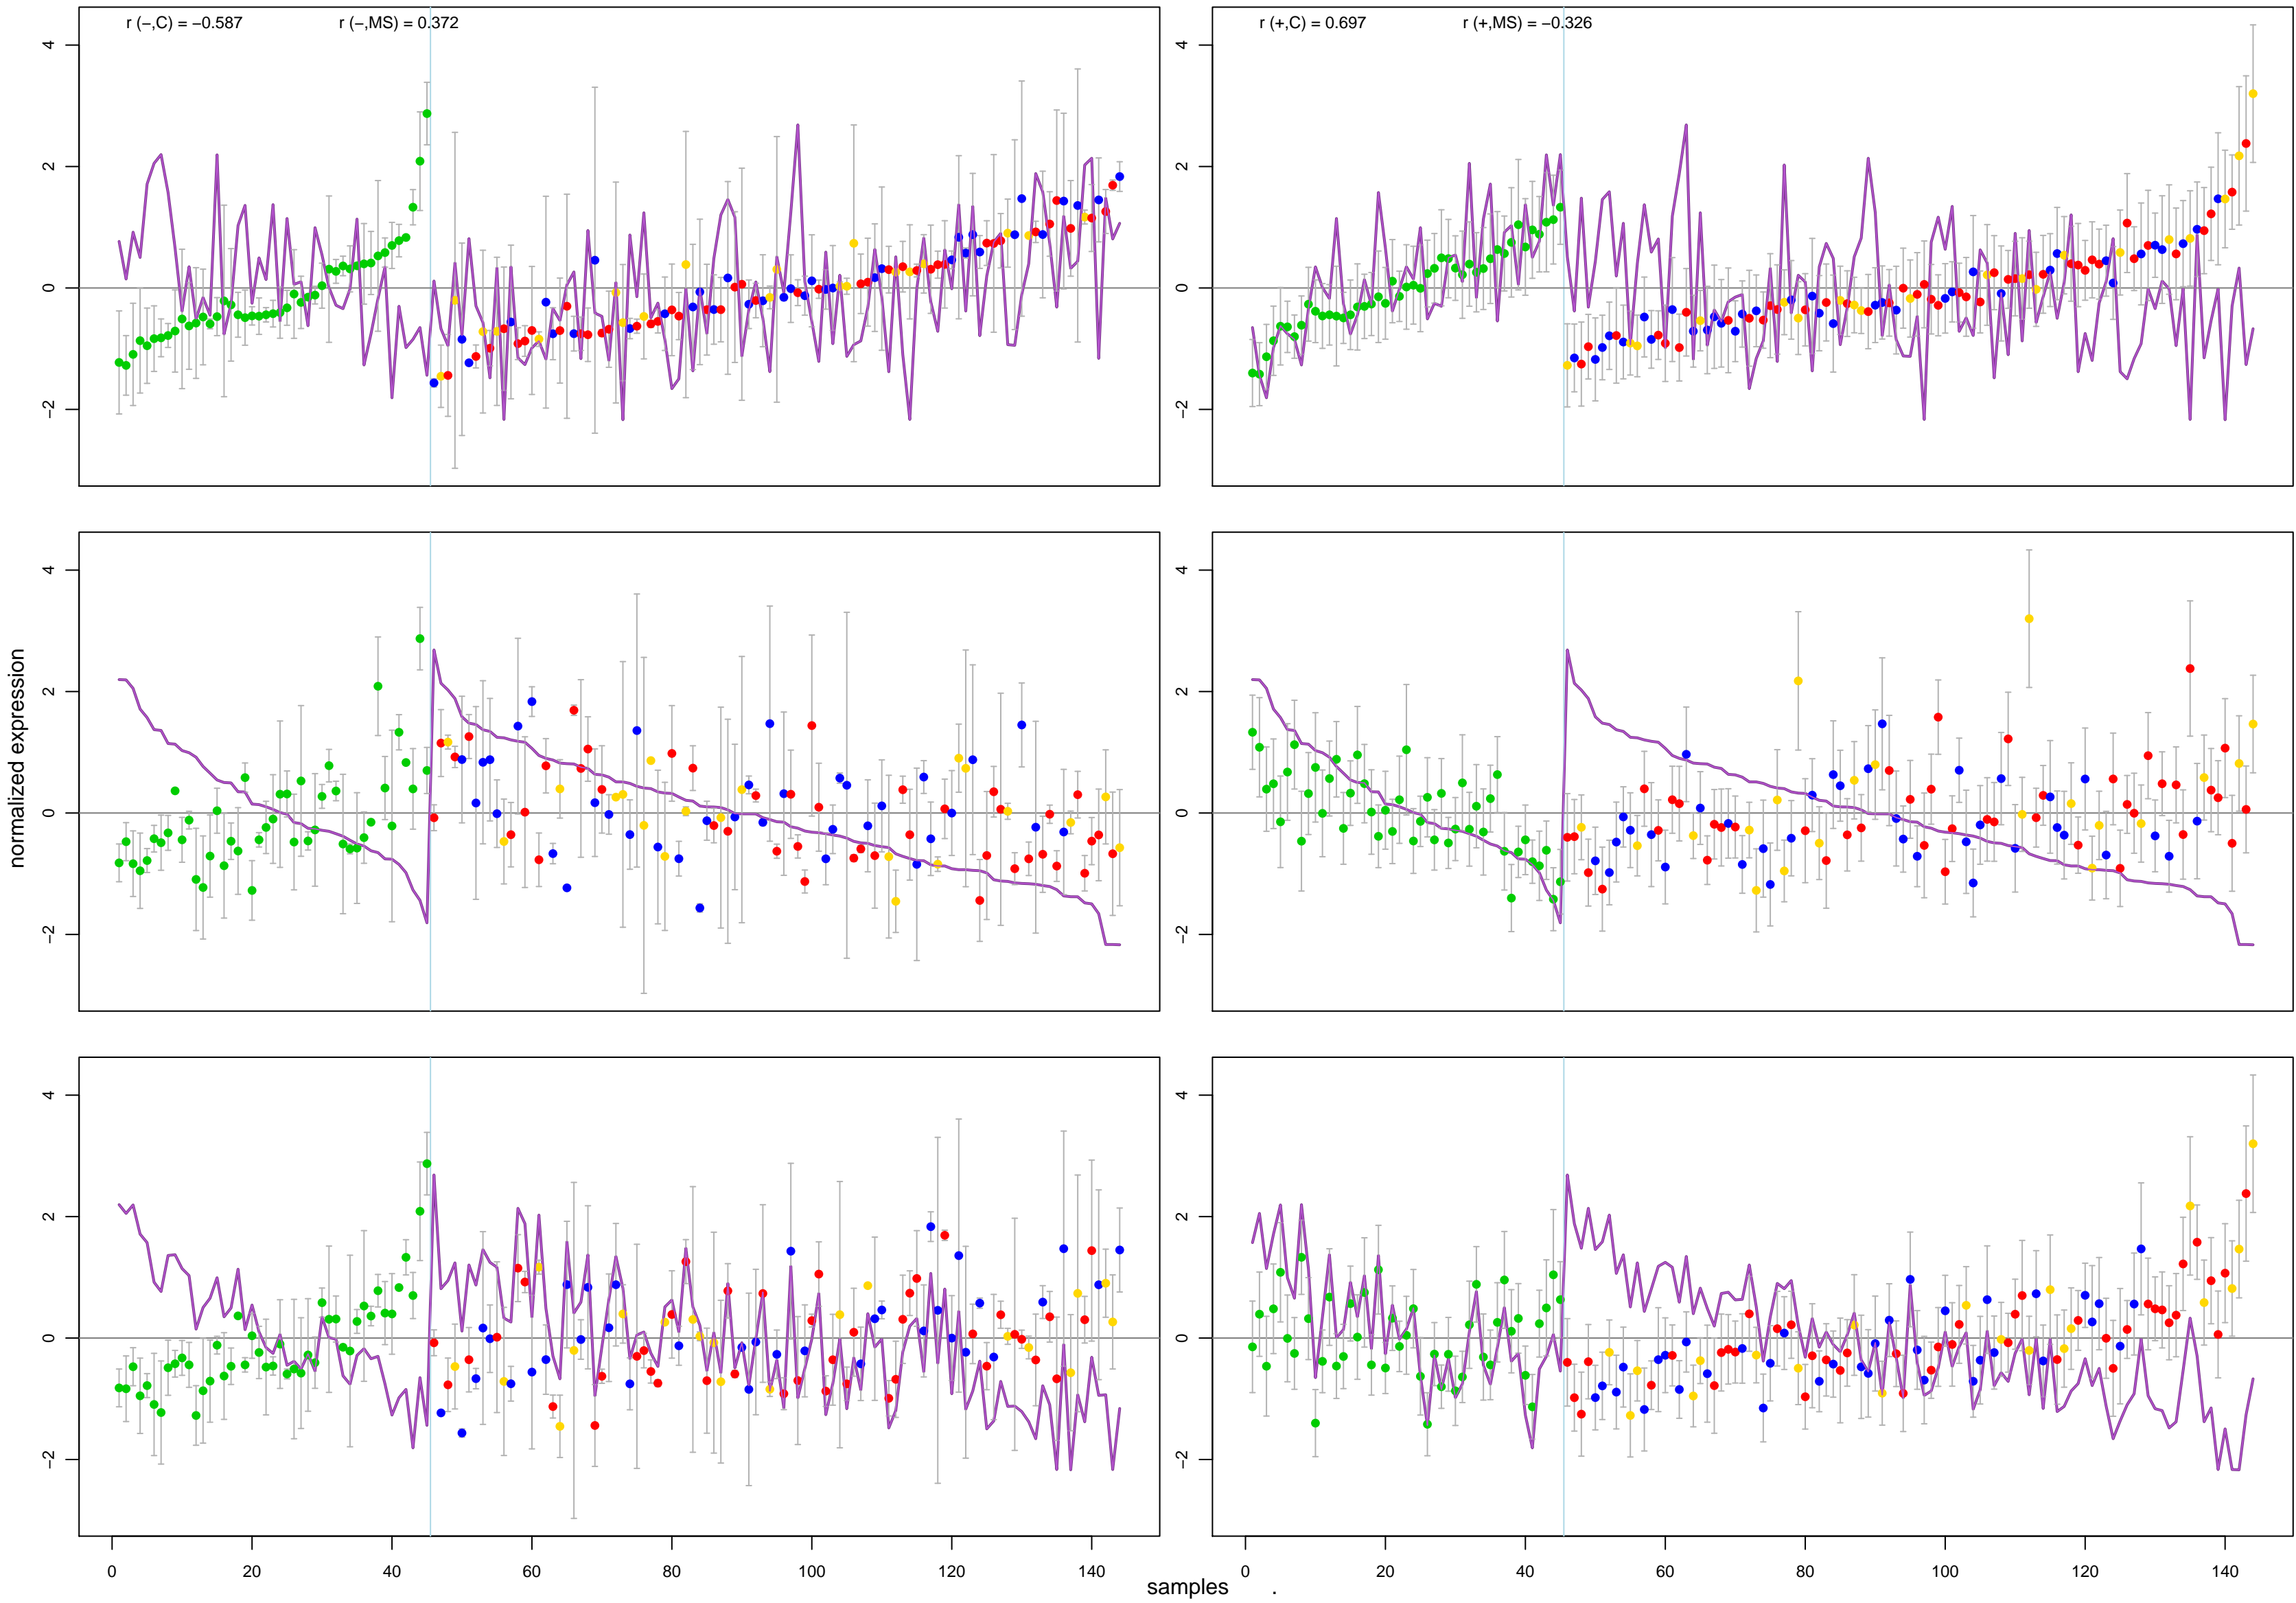

Supplement: S8 (10.1371/journal.pone.0014176.s008) [file journal.pone.0014176.s008]
