# Supplementary material for: A Transcription Factor Map as Revealed by a Genome-Wide Gene Expression Analysis of Whole-Blood mRNA Transcriptome in Multiple Sclerosis
Source: PLoS One. 2010 Dec 1;5(12):e14176. doi: 10.1371/journal.pone.0014176 (PMC2995726; doi:10.1371/journal.pone.0014176)
Supplement: Table S2 — Signatures Control - RRMS and Control - SPMS. For each signature, the probe Ids, expression values, heatmap, hitting set annotation, and gene annotations are given. (1.88 MB XLS) [file pone.0014176.s002.xls]

## Sheet: CON-RRMS
		Controls vs. Relapse Remitting MS
ILMN_1656330
ILMN_1653865
ILMN_1855607
ILMN_1777977
ILMN_1730054
ILMN_1683670
ILMN_1770055
ILMN_1688772
ILMN_1798880
ILMN_1725170
ILMN_1810085
ILMN_1706858
ILMN_1731043
ILMN_1875380
ILMN_2199389
ILMN_1671731
ILMN_1706959
ILMN_1655922
ILMN_1913759
ILMN_1898453
ILMN_1767263
ILMN_1655961
ILMN_1732554
ILMN_1679003
ILMN_1697735
ILMN_1662432
ILMN_1726387
ILMN_1911503
ILMN_2193980
ILMN_1789775
ILMN_1687440
ILMN_1879066
ILMN_2186877
ILMN_1655572
ILMN_1771757
ILMN_1860003
ILMN_2074860
ILMN_1675445
ILMN_1679060
ILMN_2074894
ILMN_1693290
ILMN_2225254
ILMN_1799137
ILMN_1702341
ILMN_2309449
ILMN_1746276
ILMN_1768261
ILMN_1790384
ILMN_1806294
ILMN_1651711
ILMN_1673757
ILMN_1704472
ILMN_1694041
ILMN_1777483
ILMN_1668979
ILMN_1670723
ILMN_1667977
ILMN_1753892
ILMN_2286334
ILMN_1892403
ILMN_1715463
ILMN_1893532
ILMN_1702698
ILMN_1709043
ILMN_1687332
ILMN_1760741
ILMN_1709132
ILMN_2128128
ILMN_1662438
ILMN_2324998
ILMN_1768176
ILMN_1664167
ILMN_1798163
ILMN_1761113
ILMN_1778730
ILMN_2219628
ILMN_1751378
ILMN_1754990
ILMN_1713482
ILMN_1693490
ILMN_1772506
ILMN_1680967
ILMN_1655377
ILMN_2087060
ILMN_1657612
ILMN_1686954
ILMN_1771060
ILMN_1706326
ILMN_1800573
ILMN_1651987
ILMN_1673738
ILMN_2160388
ILMN_1666635
ILMN_1724643
ILMN_1659771
ILMN_1715926
ILMN_1653469
ILMN_1745172
ILMN_1771620
ILMN_1782633
ILMN_1658259
ILMN_1786759
ILMN_1804851
ILMN_1756355
ILMN_2075334
ILMN_1801633
ILMN_1814650
ILMN_2396648
ILMN_1743303
ILMN_1665515
ILMN_1663616
ILMN_1796962
ILMN_1746492
ILMN_1749867
ILMN_1799814
ILMN_1688423
ILMN_1722186
ILMN_2120210
ILMN_2061435
ILMN_1745332
ILMN_1885478
ILMN_2381834
ILMN_2302632
ILMN_1677080
ILMN_1659166
ILMN_1655637
ILMN_1711845
ILMN_1670576
ILMN_1690170
ILMN_1657497
ILMN_1766894
ILMN_2077160
ILMN_2123743
ILMN_1736093
ILMN_2380453
ILMN_1748309
ILMN_1696584
ILMN_1666203
ILMN_2348194
ILMN_1807807
ILMN_1798224
ILMN_1765779
ILMN_2091707
ILMN_2391178
ILMN_1870062
ILMN_1705073
ILMN_1848994
ILMN_1679891
ILMN_1658576
ILMN_1758846
ILMN_2229839
ILMN_1815705
ILMN_1773313
ILMN_1659696
ILMN_1667201
ILMN_1707434
ILMN_2372398
ILMN_1859493
ILMN_1679324
ILMN_1718961
ILMN_1776998
ILMN_1670570
ILMN_1713006
ILMN_2303170
ILMN_2216582
ILMN_1691111
ILMN_1909149
ILMN_1768820
ILMN_2175265
ILMN_1742548
ILMN_1662174
ILMN_1698832
ILMN_1778562
ILMN_1751120
ILMN_1668092
ILMN_1691507
ILMN_1675082
ILMN_1745558
ILMN_1810797
ILMN_2199439
ILMN_2412380
ILMN_1710280
ILMN_1733937
ILMN_1717163
ILMN_1733176
ILMN_1891233
ILMN_2194009
ILMN_1912287
ILMN_1805342
ILMN_1776879
ILMN_2081162
ILMN_1739045
ILMN_1675448
ILMN_2180682
ILMN_1913336
ILMN_1688702
ILMN_1768394
ILMN_2196347
ILMN_2391458
ILMN_1704876
ILMN_1739081
ILMN_2107184
ILMN_1652104
ILMN_1773906
ILMN_1664826
ILMN_2041190
ILMN_2216815
ILMN_1815010
ILMN_2259495
ILMN_1660691
ILMN_2331266
ILMN_1703244
ILMN_1684402
ILMN_1706304
ILMN_1802257
ILMN_1781198
ILMN_1812139
ILMN_1691117
ILMN_1805192
ILMN_1758146
ILMN_1770711
ILMN_1655549
ILMN_1781290
ILMN_2179283
ILMN_1724479
ILMN_2400874
ILMN_1752027
ILMN_1655563
ILMN_1724407
ILMN_1709795
ILMN_1729748
ILMN_1788604
ILMN_1703650
ILMN_1791147
ILMN_2321292
ILMN_1686862
ILMN_1807596
ILMN_1691892
ILMN_2094952
ILMN_1670998
ILMN_1781416
ILMN_1732575
ILMN_1724422
ILMN_2072598
ILMN_1676358
ILMN_1672834
ILMN_1700044
ILMN_2133100
ILMN_1658950
ILMN_1716524
ILMN_2413517
ILMN_1894072
ILMN_1829845
ILMN_1683355
ILMN_2199554
ILMN_1661266
ILMN_1652342
ILMN_1771884
ILMN_1811787
ILMN_2258897
ILMN_1680420
ILMN_1744472
ILMN_1677827
ILMN_1905198
ILMN_1690520
ILMN_1715467
ILMN_1902728
		80939	80946	C056	C057	C052	C051	C059	C042	C058	C041	81002	C061	C044	C002	C060	80957	C046	80956	C047	C063	C062	C010	C016	C050	C033	C049	C039	C037	C013	C036	C001	C054	C018	C035	C003	C038	C040	C045	C008	C053	C007	80941	C055	C048	C043	80831	80061	80078
		1	1	1	1	1	1	1	1	1	1	1	1	1	1	1	1	1	1	1	1	1	1	1	1	1	1	1	1	1	1	1	1	1	1	1	1	1	1	1	1	1	1	1	1	1	2	2	2
[truncated: 116 more columns]

## Sheet: CON-SPMS
		Controls vs. Secondary Progressive MS
ILMN_1790987
ILMN_1693221
ILMN_1696186
ILMN_1795435
ILMN_1900624
ILMN_1853264
ILMN_1729640
ILMN_1908052
ILMN_1762528
ILMN_1724266
ILMN_2197846
ILMN_1914073
ILMN_1750674
ILMN_1901666
ILMN_1758398
ILMN_1756715
ILMN_2388965
ILMN_1910770
ILMN_1665948
ILMN_1740648
ILMN_2197030
ILMN_1774997
ILMN_1917082
ILMN_1670875
ILMN_1652685
ILMN_1703891
ILMN_2234187
ILMN_1699767
ILMN_1652342
ILMN_1868872
ILMN_1802257
ILMN_2259495
ILMN_1751120
ILMN_1742009
ILMN_2091920
ILMN_1651496
ILMN_1711786
ILMN_1735788
ILMN_1689734
ILMN_2148819
ILMN_1709795
ILMN_1703316
ILMN_1673586
ILMN_1740010
ILMN_1662932
ILMN_1716524
ILMN_1813379
ILMN_1749239
ILMN_1701403
ILMN_1730791
ILMN_1803183
ILMN_1661488
ILMN_1748105
ILMN_1681591
ILMN_1652409
ILMN_1787954
ILMN_1810652
ILMN_1661440
ILMN_1666449
ILMN_1757569
ILMN_1762561
ILMN_1859810
ILMN_1690278
ILMN_1674650
ILMN_2049063
ILMN_1666477
ILMN_1690695
ILMN_1819939
ILMN_1767579
ILMN_1801822
ILMN_1670134
ILMN_1876823
ILMN_1811238
ILMN_1700556
ILMN_2356331
ILMN_1902455
ILMN_1714223
ILMN_1705733
ILMN_1691881
ILMN_2186877
ILMN_1654987
ILMN_1804263
ILMN_1782751
ILMN_1738648
ILMN_1786118
ILMN_1731353
ILMN_1760208
ILMN_1833131
ILMN_1656772
ILMN_1702698
ILMN_2074860
ILMN_1765819
ILMN_1695978
ILMN_2169856
ILMN_2354237
ILMN_1712959
ILMN_1679003
ILMN_2233099
ILMN_1813475
ILMN_1659771
ILMN_1756311
ILMN_1804327
ILMN_1789186
ILMN_1673738
ILMN_1681892
ILMN_1662263
ILMN_1690970
ILMN_1658628
ILMN_2076658
ILMN_1748915
ILMN_1811593
ILMN_2176063
ILMN_1704086
		C013	C037	80946	C055	C053	C060	C043	C002	C050	C036	C001	C054	81002	C061	C044	C003	C063	C047	C008	80939	C048	C010	C049	C033	80956	C035	C038	C045	C051	C058	C041	80941	C018	C039	C056	C040	C057	C016	C052	C059	C042	80957	C062	C046	C007	GC_110/1	80273	80825
		1	1	1	1	1	1	1	1	1	1	1	1	1	1	1	1	1	1	1	1	1	1	1	1	1	1	1	1	1	1	1	1	1	1	1	1	1	1	1	1	1	1	1	1	1	3	3	3
[truncated: 84 more columns]
