# Supplementary material for: A Transcription Factor Map as Revealed by a Genome-Wide Gene Expression Analysis of Whole-Blood mRNA Transcriptome in Multiple Sclerosis
Source: PLoS One. 2010 Dec 1;5(12):e14176. doi: 10.1371/journal.pone.0014176 (PMC2995726; doi:10.1371/journal.pone.0014176)
Supplement: Table S3 — Signatures Control - PPMS, PPMS - SPMS, RRMS - PPMS and RRMS - SPMS. For each signature, the probe Ids, expression values, heatmap, hitting set annotation, and gene annotations are given. (2.27 MB XLS) [file pone.0014176.s003.xls]

## Sheet: CON-PPMS
			Controls vs. Primapry Progressive MS
ILMN_1704472
ILMN_2082810
ILMN_1899850
ILMN_1905177
ILMN_1703196
ILMN_2089329
ILMN_2197846
ILMN_1755487
ILMN_1763412
ILMN_1770505
ILMN_1653165
ILMN_1881408
ILMN_1811787
ILMN_1903590
ILMN_1839258
ILMN_1700759
ILMN_1823314
ILMN_1756439
ILMN_1682781
ILMN_1680668
ILMN_1860168
ILMN_1917082
ILMN_1900471
ILMN_2352023
ILMN_1668663
ILMN_1894042
ILMN_1728914
ILMN_1689306
ILMN_1651373
ILMN_2408663
ILMN_1876708
ILMN_1757742
ILMN_1827259
ILMN_2084825
ILMN_1796678
ILMN_1804448
ILMN_1679324
ILMN_1776519
ILMN_1843585
ILMN_1710303
ILMN_1735712
ILMN_1911042
ILMN_1788764
ILMN_1776998
ILMN_1784207
ILMN_1671583
ILMN_2367191
ILMN_1736911
ILMN_1777233
ILMN_1750130
ILMN_1714765
ILMN_1656427
ILMN_2096322
ILMN_1815023
ILMN_1706434
ILMN_1782788
ILMN_1743911
ILMN_1679267
ILMN_1663605
ILMN_1820772
ILMN_1761828
ILMN_1703650
ILMN_1691942
ILMN_2312296
ILMN_1687940
ILMN_1711786
ILMN_1702171
ILMN_1864714
ILMN_1738033
ILMN_1753925
ILMN_1700231
ILMN_2335198
ILMN_1701603
ILMN_2150196
ILMN_1681657
ILMN_2148819
ILMN_2212763
ILMN_1809583
ILMN_1713934
ILMN_2283325
ILMN_1735014
ILMN_2308849
ILMN_1679929
ILMN_1749006
ILMN_1786211
ILMN_1709795
ILMN_1750718
ILMN_1658950
ILMN_1822671
ILMN_1795719
ILMN_1908052
ILMN_1676799
ILMN_2330948
ILMN_1804854
ILMN_1812688
ILMN_1665117
ILMN_1728083
ILMN_1747146
ILMN_1738992
ILMN_2289849
ILMN_1793371
ILMN_2043265
ILMN_1677098
ILMN_1753279
ILMN_1651347
ILMN_1773906
ILMN_2384241
ILMN_1792587
ILMN_1803811
ILMN_1703244
ILMN_1791576
ILMN_1768197
ILMN_1670875
ILMN_2104106
ILMN_1719343
ILMN_2158242
ILMN_1667201
ILMN_1715745
ILMN_1802257
ILMN_2214278
ILMN_2381559
ILMN_1784046
ILMN_1711453
ILMN_2409879
ILMN_1745900
ILMN_1833915
ILMN_1791759
ILMN_2330371
ILMN_1793476
ILMN_1688178
ILMN_1808219
ILMN_1675156
ILMN_1663616
ILMN_1796962
ILMN_2309449
ILMN_2074860
ILMN_1860003
ILMN_1824666
ILMN_1875380
ILMN_1809012
ILMN_1790384
ILMN_2244841
ILMN_2209515
ILMN_1787954
ILMN_1655922
ILMN_2199389
ILMN_1656421
ILMN_1766264
ILMN_1883997
ILMN_1668900
ILMN_1854196
ILMN_1652277
ILMN_1799589
ILMN_1704627
ILMN_2210298
ILMN_1734542
ILMN_1883298
ILMN_1680393
ILMN_1859293
ILMN_2285032
ILMN_1681741
ILMN_1847602
ILMN_1663068
ILMN_2260833
ILMN_1892403
ILMN_1755808
ILMN_1751431
ILMN_1842582
ILMN_1693685
ILMN_1730628
ILMN_1709056
ILMN_1737015
ILMN_2142815
ILMN_1787949
ILMN_2208903
ILMN_1788742
ILMN_1759997
ILMN_1656807
ILMN_1781795
ILMN_1687359
ILMN_1753976
ILMN_2349444
ILMN_1655377
ILMN_1797731
ILMN_1809347
ILMN_1790461
ILMN_2324056
ILMN_1754990
ILMN_1778730
ILMN_1666635
ILMN_2146761
ILMN_2080611
ILMN_2200659
ILMN_1659771
ILMN_2323774
ILMN_1707810
ILMN_1713862
ILMN_2402090
ILMN_1801795
ILMN_1797684
ILMN_1760245
ILMN_1712806
ILMN_1806123
ILMN_1814156
ILMN_2402674
ILMN_1805720
ILMN_1697820
ILMN_1724280
ILMN_1746948
ILMN_1743655
ILMN_2252408
ILMN_2065822
ILMN_2074894
ILMN_1695759
ILMN_1877196
ILMN_1731353
ILMN_1733531
ILMN_1886040
ILMN_1782034
ILMN_1783806
ILMN_1651943
ILMN_1897745
ILMN_2055760
			C013	C037	80946	C055	C053	C060	C043	C002	C050	C036	C001	C054	81002	C061	C044	C003	C063	C047	C008	80939	C048	C010	C049	C033	80956	C035	C038	C045	C051	C058	C041	80941	C018	C039	C056	C040	C057	C016	C052	C059	C042	80957	C062	C046	C007	P005	P044
			1	1	1	1	1	1	1	1	1	1	1	1	1	1	1	1	1	1	1	1	1	1	1	1	1	1	1	1	1	1	1	1	1	1	1	1	1	1	1	1	1	1	1	1	1	4	4
[truncated: 130 more columns]

## Sheet: PPMS-SPMS
		Primary Progressive MS vs. Secondary Progressive MS
ILMN_1864137
ILMN_1686885
ILMN_1743031
ILMN_1746763
ILMN_1905817
ILMN_1740613
ILMN_1885464
ILMN_1690922
ILMN_1704173
ILMN_1690278
ILMN_2153373
ILMN_1666449
ILMN_1874190
ILMN_1860487
ILMN_1819939
ILMN_1749583
ILMN_1899762
ILMN_1690695
ILMN_1676749
ILMN_1762561
ILMN_1899034
ILMN_1839019
ILMN_1744937
ILMN_1719343
ILMN_1780842
ILMN_2055156
ILMN_1785107
ILMN_1912287
ILMN_2143155
ILMN_1673172
ILMN_1861090
ILMN_1700556
ILMN_1841260
ILMN_1822671
ILMN_1659627
ILMN_1738046
ILMN_1734692
ILMN_1851667
ILMN_2199439
ILMN_1763127
ILMN_1670757
ILMN_2114972
ILMN_1784690
ILMN_1736490
ILMN_1665647
ILMN_1722726
ILMN_1783142
ILMN_1799591
ILMN_1888242
ILMN_1698038
ILMN_1717726
ILMN_1676611
ILMN_1912135
ILMN_1725547
ILMN_1807745
ILMN_1762605
ILMN_1862707
ILMN_2079991
ILMN_1760981
ILMN_1883997
ILMN_1807211
ILMN_1697409
ILMN_1779751
ILMN_1798270
ILMN_1803194
ILMN_1744815
ILMN_1826771
ILMN_2405797
ILMN_1688953
ILMN_1685824
ILMN_1724333
ILMN_1658247
ILMN_1694711
ILMN_1661488
ILMN_1813801
ILMN_2101930
ILMN_1712518
ILMN_1652928
ILMN_1704627
ILMN_1688772
ILMN_1853264
ILMN_1701286
ILMN_1910998
ILMN_1776435
		GC_110/1	80273	80825	GC_86/1	GC_74/1	P038	80826	GC_1161/1	80901	GC_751/1	GC_1030/1	GC_67/1	P037	80801	GC_71/1	80169	80802	GC_124/1	80838	GC_642/1	P005	P044	81194	P052	P004	P043	P042	P041	GC_313/1	P029	80839	P045	GC_117/1	P028	P031	80190	P012	P035	P048	80302	P009	P036	P047	80800	P008	P046	P050	P039
		3	3	3	3	3	3	3	3	3	3	3	3	3	3	3	3	3	3	3	3	4	4	4	4	4	4	4	4	4	4	4	4	4	4	4	4	4	4	4	4	4	4	4	4	4	4	4	4
[truncated: 80 more columns]

## Sheet: RRMS-PPMS
		Relapse Remitting MS vs. Primary Progressive MS
ILMN_1860216
ILMN_1745332
ILMN_1797929
ILMN_1675282
ILMN_1673026
ILMN_1742089
ILMN_1781290
ILMN_1787513
ILMN_1691117
ILMN_1664826
ILMN_1883492
ILMN_1896137
ILMN_1829541
ILMN_1658427
ILMN_1791759
ILMN_1798270
ILMN_2368145
ILMN_1669094
ILMN_1778974
ILMN_1829851
ILMN_1696749
ILMN_1778562
ILMN_1773018
ILMN_1727704
ILMN_1746948
ILMN_1740685
ILMN_1668900
ILMN_1786444
ILMN_1810797
ILMN_2366790
ILMN_1675082
ILMN_2112755
ILMN_2082324
ILMN_1796240
ILMN_1652928
ILMN_1837271
ILMN_1749586
ILMN_1680130
ILMN_1668880
ILMN_1704785
ILMN_2062468
ILMN_1844668
ILMN_1720311
ILMN_1695316
ILMN_1769409
ILMN_1655444
ILMN_1713482
ILMN_2396648
ILMN_2054725
ILMN_1756367
ILMN_1676799
ILMN_1812297
ILMN_1705685
ILMN_2254123
ILMN_1655136
ILMN_1661788
ILMN_1708900
ILMN_2193233
ILMN_2105441
ILMN_1749131
ILMN_1726114
ILMN_2171295
ILMN_1675445
ILMN_2280816
ILMN_1748852
ILMN_1870062
ILMN_1839740
ILMN_1653342
ILMN_1727574
ILMN_1840401
ILMN_2401155
ILMN_2103919
ILMN_1805735
ILMN_2367753
ILMN_1706858
ILMN_1724207
ILMN_1699179
ILMN_1667000
ILMN_1702633
ILMN_1742197
ILMN_1786290
ILMN_1761531
ILMN_1775490
ILMN_1855607
ILMN_1697123
ILMN_1737849
ILMN_2408663
ILMN_1742269
ILMN_1812043
ILMN_1767355
ILMN_1671318
ILMN_1659627
ILMN_1766770
ILMN_1822671
		GC_1031/1	80087	GC_1229/1	GC_754/1	GC_106/1	GC_119/1	80610	GC_76/1	GC_194/1	GC_105/1	80079	GC_761/1	80721	GC_1216/1	GC_1195/1	GC_460/1	GC_121/5	80046	GC_68/1	GC_1220/1	GC_1166/1	80831	80121	GC_66/1	GC_62/1	80061	GC_1049/1	80114	80078	80116	80303	GC_82/1	GC_63/1	GC_1156/1	GC_258/1	71923	P005	P044	81194	P052	P004	P043	P042	P041	GC_313/1	P029	80839	P045
		2	2	2	2	2	2	2	2	2	2	2	2	2	2	2	2	2	2	2	2	2	2	2	2	2	2	2	2	2	2	2	2	2	2	2	2	4	4	4	4	4	4	4	4	4	4	4	4
[truncated: 112 more columns]

## Sheet: RRMS-SPMS
		Relapse Remitting MS vs. Secondary Progressive MS
ILMN_1740648
ILMN_1657497
ILMN_1656132
ILMN_1862707
ILMN_1864823
ILMN_2223805
ILMN_1675632
ILMN_1912135
ILMN_1781251
ILMN_1675013
ILMN_1652417
ILMN_1862198
ILMN_1729640
ILMN_1778319
ILMN_1653394
ILMN_1762605
ILMN_2120210
ILMN_2353732
ILMN_1767263
ILMN_1700627
ILMN_1745154
ILMN_1868872
ILMN_1756935
ILMN_1901666
ILMN_1801909
ILMN_1726798
ILMN_1702372
ILMN_1693221
ILMN_1700728
ILMN_1671678
ILMN_1666553
ILMN_1683355
ILMN_1760858
ILMN_1893675
ILMN_1786483
ILMN_1917082
ILMN_1862303
ILMN_2138249
ILMN_2209088
ILMN_1734692
ILMN_1841260
ILMN_2050200
ILMN_1811593
ILMN_1743031
ILMN_1706374
ILMN_1833680
ILMN_1885464
ILMN_1695978
ILMN_1666449
ILMN_1850461
ILMN_2199439
ILMN_1733937
ILMN_1699071
ILMN_1724533
ILMN_2130514
ILMN_1798108
ILMN_1784946
ILMN_1737972
ILMN_1714848
ILMN_1652494
ILMN_1736218
ILMN_1757569
ILMN_1781290
ILMN_1706246
ILMN_1819939
ILMN_2414568
ILMN_1670757
ILMN_1680010
ILMN_1782751
ILMN_1912287
		GC_1031/1	80087	GC_1229/1	GC_754/1	GC_106/1	GC_119/1	80610	GC_76/1	GC_194/1	GC_105/1	80079	GC_761/1	80721	GC_1216/1	GC_1195/1	GC_460/1	GC_121/5	80046	GC_68/1	GC_1220/1	GC_1166/1	80831	80121	GC_66/1	GC_62/1	80061	GC_1049/1	80114	80078	80116	80303	GC_82/1	GC_63/1	GC_1156/1	GC_258/1	71923	GC_110/1	80273	80825	GC_86/1	GC_74/1	P038	80826	GC_1161/1	80901	GC_751/1	GC_1030/1	GC_67/1
		2	2	2	2	2	2	2	2	2	2	2	2	2	2	2	2	2	2	2	2	2	2	2	2	2	2	2	2	2	2	2	2	2	2	2	2	3	3	3	3	3	3	3	3	3	3	3	3
[truncated: 66 more columns]
