# Supplementary material for: A Transcription Factor Map as Revealed by a Genome-Wide Gene Expression Analysis of Whole-Blood mRNA Transcriptome in Multiple Sclerosis
Source: PLoS One. 2010 Dec 1;5(12):e14176. doi: 10.1371/journal.pone.0014176 (PMC2995726; doi:10.1371/journal.pone.0014176)
Supplement: Table S5 — TRANSFAC Profiles. Excel file containing the TRANSFAC profiles for the 7 signatures, 14 up/down-regulated signature subsets, and 15 star clusters. (0.30 MB XLS) [file pone.0014176.s005.xls]

## Sheet: Signatures
		Significance of association (-log(p-value))
TRANSFAC motif		C/MS		C/PP		C/RR		C/SP		PP/RR		RR/SP		PP/SP		HS			Binding sequence	Factor name	Binding factor
V$E47_02 (M00071)			5.79																NNNMRCAGGTGTTMNN	E47	E47(h)
V$E2F_Q6 (M00427)		3	5.24																TTTSGCGS	E2F	E2F(h):DP(h)
V$MYOD_01 (M00001)		3	5.24																SRACAGGTGKYG	MyoD	MyoD(m)
V$CREB_Q2_01 (M00916)		2	5.13													6	6.17		NNTKACGTCANNNS	CREB	CREB1(b); deltaCREB(h); CREB(h); CREB(HA); CREB(mv); CREMtaualpha(m); CREMbeta(m); CREMtau1(m); CREMtau2(m); CREMtau(m); CREMalpha(m); CREMgamma(m); deltaCREB(r); CREB1(r); CREBbeta(m); CREB(m); CREMalpha(h); CREMtau(r)
V$E2F1_Q6_01 (M00940)		2	4.78		4.43						3.54						6.84		NTTTCGCGCS	E2F-1	E2F-1(m); E2F-1(h)
V$CREB_Q2 (M00177)			4.14				7.34		4.31										NSTGACGTAANN	CREB	CREB1(b); CREB(h); CREB(HA); CREB(mv); CREB1(r); CREB(m)
V$E12_Q6 (M00693)			4.02																RRCAGGTGNCV	E12	E12(h); E12(x); E12(m); E12(r)
V$E2F_Q3_01 (M00918)			3.95		5.56												5.63		TTTSGCGSG	E2F	E2F-3a(h); E2F-4(h); E2F(m); E2F(r); E2F(h):DP(h); E2F(h):DP(h):E4(AD5); DP-1(h); E2F-1(m); E2F-1(h)
V$CREBP1_Q2 (M00179)			3.95				6.11		6.78										VGTGACGTMACN	ATF2	ATF-2-xbb4(h); CRE-BP1(m)
V$E2F1_Q4 (M00430)			3.89		5.63		4.14					7	4.56				5.4		NTTSGCGG	E2F-1	E2F-1(m)
V$E2F1DP1_01 (M00736)			3.84														10.06		TTTCSCGC	E2F-1:DP-1	E2F-1(h):DP-1(h)
V$HP1SITEFACTOR_Q6 (M00725)		2	3.84																AATWTTCAACAG	HP1 site factor	HP1 site factor(r)
V$LDSPOLYA_B (M00317)		3	3.73																NNNSTGTGTDYYCWTN	Poly A
V$AHR_Q5 (M00778)			3.66																NTNGCGTGNNN	AhR	AhR(h); AhR(m); AhR(r); AhR(gp); AhR(rb)
V$AIRE_01 (M00999)		2	3.6																WTNNNWNNTGGWWNNNWNGGNNWNWN	AIRE	AIRE(h); AIRE-isoform1(h)
V$STAT5A_02 (M00460)			3.6																TTCCNRGAANNNNNNTTCCNNGRR	STAT5A (homotetramer)	STAT5A(h); STAT5A(s); STAT5A(m)
V$PTF1BETA_Q6 (M00657)			3.54																GRGAAAMBBWCAGS	PTF1-beta	PTF1-beta(r)
V$TEL2_Q6 (M00678)					8.33														YTACTTCCTG	Tel-2	Tel-2a(h); Tel-2c(h); Tel-2b(h)
V$VMYB_01 (M00003)				1	7.13														AATAACGGNA	v-Myb	v-Myb(AMV)
V$DEC_Q1 (M00997)				1	5.4														SCCCAMGTGAAGN	DEC	Stra13(m); DEC1(h); DEC2(h); DEC2(m); DEC1(r); DEC2(r)
V$AP1_Q2 (M00173)				1	4.9							4	3.89						RSTGACTNANW	AP-1	AP-1(h); AP-1(XEN); AP-1(mo); AP-1(r); AP-1(m); AP-1(HA); AP-1(c); AP-1(GIB)
V$ER_Q6 (M00191)					4.72														NNARGNCANNNTGACCYNN	ER	ER-alpha(h); ER-alpha-L(h); ER-alpha(c); ER-alpha(m); ER-alpha(r)
V$KROX_Q6 (M00982)					4.61												5.01		CCCGCCCCCRCCCC	KROX	Egr-1(h); Egr-3(h); Egr-4(h); Egr-2(h); Egr-3(m); Egr-1(mo); Egr-2(m); Egr-1(m); Egr-4(r); Egr-1(r)
V$POU6F1_01 (M00465)					4.02		4.02												GCATAAWTTAT	POU6F1	POU6F1 (c2)(m)
V$YY1_02 (M00069)					3.89														NNNCGGCCATCTTGNCTSNW	YY1	YY1(h); YY1(m)
V$ELK1_02 (M00025)						1	7.05									4	4.9		NNNNCCGGAARTNN	Elk-1	Elk-1(h); Elk-1-isoform1(h)
V$ATF_B (M00338)							6.42		8.56										NTGACGTCANYS	ATF	ATF(h)
V$NFKAPPAB65_01 (M00052)							6.24												GGGRATTTCC	NF-kappaB (p65)	RelA-p65(h); RelA-p65(m)
V$CREB_Q4 (M00178)						1	5.63	1	4.31										NSTGACGTMANN	CREB	CREB1(b); CREB(h); CREB(HA); CREB(mv); CREB1(r); CREB(m)
V$CAAT_01 (M00254)						1	5.3												NNNRRCCAATSA	CCAAT box
V$CREBP1CJUN_01 (M00041)							4.14	1	8.89										TGACGTYA	ATF2:c-Jun	c-Jun(c); c-Jun(h); c-Jun(r); ATF-2-xbb4(h); c-Jun(m)
V$CREB_01 (M00039)							4.02		5.24										TGACGTMA	CREB	deltaCREB(h); CREB(h); deltaCREB(r); CREB1(r); deltaCREB(m); CREB(m)
V$NRF2_Q4 (M00821)							3.66												NTGCTGAGTCAKN	Nrf-2	Nrf2(m):MafK(m); Nrf2(r):MafK(r); Nrf2(m); Nrf2(h); Nrf2-isoform1(h); Nrf2(r)
V$E2F1_Q6 (M00431)						1	3.54									7	6.34		TTTSGCGS	E2F-1	E2F-1(m); E2F-1(h)
V$ATF1_Q6 (M00691)								1	5.85										CYYTGACGTCA	ATF1	ATF-1(h); ATF-1(m)
V$USF_C (M00217)								1	4.49										NCACGTGN	USF	USF1(m); USF1(h); USF(HA); USF(c); USF(DUCK); USF1(r)
V$ATF3_Q6 (M00513)									4.31										CBCTGACGTCANCS	ATF3	ATF3(h); ATF3(m); ATF3(r)
V$TEF_Q6 (M00672)								1	3.89										ATGTTWAYATAA	TEF	TEF-xbb1(h); TEF(r)
V$AML_Q6 (M00769)								1	3.54										NNGKNTGTGGTTWNC	AML	AML1(h); AML1b(h); AML1c(h); AML1a(h); AML2(h); AML3(h); AML3-isoform2(h); AML3-isoform1(h); PEBP2alphaB1(m); PEBP2alphaB2(m); PEBP2alphaA1(m); PEBP2alphaA2(m); RUNX2-isoform2(m); AML1(r); AML3(r); AML1(GIB); PEBP2beta(m)
V$PPARA_02 (M00518)								1	3.54										NNRGGTCATWGGGGTSANG	PPARalpha:RXRalpha	PPARalpha(h); RXR-alpha(h); PPARalpha(m); PPARalpha(x); RXR-alpha(x); RXR-alpha(m); RXR-alpha(r); PPARalpha(r)
V$TFIIA_Q6 (M00707)										7	5.36								TMTRWRAGGRSS	TFIIA	TFIIA(h); TFIIA-alpha/beta precursor (minor)(h); TFIIA-alpha/beta precursor (major)(h); TFIIA-gamma(h)
V$USF_01 (M00121)											5.24								NNRYCACGTGRYNN	USF	USF1(m); USF1(h); USF(HA); USF(c); USF(DUCK); USF1(r)
V$OCT1_Q6 (M00195)										7	5.13								NNNNATGCAAATNAN	OCT1	POU2F1(h); Oct-1(r); POU2F1(mo); POU2F1(GIB); POU2F1(ha); POU2F1(c); POU2F1(x); POU2F1a(m)
V$E2F1DP2_01 (M00737)										4	5.08		3.95				5.13		TTTSSCGC	E2F-1:DP-2	E2F-1(h):DP-2(h)
V$NMYC_01 (M00055)											4.96								NNCCACGTGNNN	N-Myc	N-Myc(m)
V$CART1_01 (M00416)										4	4.38								NNNTAATTNNCATTANCN	Cart-1	Cart-1(h); Cart-1(r); Cart-1(x); Cart-1(m)
V$AP1_Q4 (M00188)										6	4.31								RGTGACTMANN	AP-1	AP-1(h); AP-1(XEN); AP-1(mo); AP-1(r); AP-1(m); AP-1(HA); AP-1(c); AP-1(GIB)
V$MINI20_B (M00324)										6	4.08								NNNNGVCNCCAYNCMRSNGSM	Muscle initiator sequence-20
V$ARNT_02 (M00539)											3.66								NNNNNRTCACGTGAYNNNNN	Arnt	Arnt(h); Arnt(m); Arnt-L(m); Arnt(r)
V$E2F_Q6_01 (M00920)											3.54						5.9		NKCGCGCSAAAN	E2F	E2F-3a(h); E2F-4(h); E2F(m); E2F(r); E2F(h):DP(h); E2F(h):DP(h):E4(AD5); E2F-1(h):DP-1(h); DP-1(h); E2F-7(h); E2F-7(m); E2F-1(m); E2F-1(h)
V$CETS1P54_01 (M00032)												7	7.05						NCMGGAWGYN	c-Ets-1(p54)	c-Ets-1(m)
V$IRF_Q6 (M00772)													5.79						BNCRSTTTCANTTYY	IRF	IRF-3(h); IRF-7H(h); IRF-7A(h); IRF-4(h); IRF-5(h); IRF-5(m); IRF-6(x); IRF-6(h); IRF-6(m); IRF-3(c); IRF-3(m); IRF-7(m); IRF-10(c); IRF-8(h); IRF-8(c); IRF-2(c); IRF-1(c); IRF-4(m); IRF-1(m); IRF-1(r); IRF-1(h); IRF-8(m); IRF-2(h); IRF-2(m)
V$E2F4DP2_01 (M00739)													5.79				6.89		TTTCSCGC	E2F-4:DP-2	E2F-4(h):DP-2(h)
V$DEAF1_01 (M01001)												4	5.56			6	10.06		NCGNNYTCGGGNRTTTCCGDARNNN	DEAF1	DEAF-1(pt)
V$CAAT_C (M00200)													4.72						ACCAATCANCNNGCYYSNCNCWNNT	CCAAT box
V$BACH1_01 (M00495)												4	4.67						NNSATGAGTCATGNT	Bach1	Bach1(m); Bach1(h)
V$PIT1_Q6 (M00802)												7	4.56		3.84				NMTTCATAAWTATWNMNA	Pit-1	Pit-1B(h); Pit-1(m); Pit-1B(r); Pit-1A(r); Pit-1-xbb3(r)
V$LEF1TCF1_Q4 (M00978)												6	4.31						MCTTTGWWSNY	LEF1, TCF1	TCF-1(h); TCF-1A(h); TCF-1B(h); TCF-1C(h); TCF-1G(h); TCF-1E(h); TCF-1F(h); LEF-1(z); LEF-1(x); TCF-1(P)(m); TCF-1B(m); LEF-1(h); LEF-1(r); LEF-1(m); LEF-1S(m); LEF-1(c)
V$IPF1_Q4 (M00436)													4.31						GHNNTAATGACM	IPF1	IPF1(h); IPF1(m); IPF1(r); IPF1(gl); IPF1(x)
V$AHRARNT_01 (M00235)													4.14						KNNKNNTYGCGTGCMS	AhR:Arnt	Arnt(h); AhR(h); Arnt(m); Arnt-L(m); Arnt(r); AhR(m); AhR(r); AhR(gp)
V$AP1_C (M00199)												6	3.89						NTGASTCAG	AP-1	AP-1(h); AP-1(XEN); AP-1(mo); AP-1(r); AP-1(m); AP-1(HA); AP-1(d); AP-1(c); AP-1(GIB)
V$TAL1_Q6 (M00993)												4	3.66						TCCAKCTGNY	TAL1	Tal-1(c); Tal1-PP42(h); Tal-1(m)
V$FOXJ2_02 (M00423)													3.66				3.66		AYMATAATATTTKN	FOXJ2	FOXJ2(m); FOXJ2 (long isoform)(h)
V$CDX2_Q5 (M00729)													3.54						ANANTTTTATKRCC	Cdx-2	Cdx-3(gl); Cdx-2(m)
V$AREB6_03 (M00414)													3.48						VNRCACCTGKNC	AREB6	ZEB (1124 AA)(h)
V$TITF1_Q3 (M00432)															6.05				ASTCAAGTRK	TTF1 (Nkx2-1)	Nkx2-1(m); Nkx2-1(c); Nkx2-1(b); Nkx2-1(ca); Nkx2-1(r); Nkx2-1(h); Nkx2-1-isoform1(h)
V$BARBIE_01 (M00238)														2	6				ATNNAAAGCNGGNGG	Barbie Box
V$SRF_Q5_01 (M00922)														3	5.51		4.02		CCAWATAWGGMNMNG	SRF	SRF(m); SRF-I(m); SRF-L(m); SRF-M(m); SRF-S(m); SRF(h); SRF(r)
V$IK3_01 (M00088)															5.3				TNYTGGGAATACC	Ik-3	Ik-3(m)
V$E2_01 (M00107)															5.24		3.84		NNACCRNNANCGGTRN	E2	E2(BPV1)
V$OCT1_02 (M00136)														3	4.56				NNGAATATKCANNNN	OCT1	POU2F1(h); Oct-1(r); POU2F1(mo); POU2F1(GIB); POU2F1(ha); POU2F1(c); POU2F1(x); POU2F1a(m)
V$HNF1_Q6 (M00790)														3	4.43				WRGTTAATNATTAACNNN	HNF1	HNF-1alpha-B(h); HNF-1alpha-C(h); HNF-1alpha-A(h); HNF-1beta-C(h); HNF-1beta-B(h); HNF-1beta-A(h); HNF-1alpha(pg); HNF-1alpha(c); HNF-1beta(pg); HNF-1alpha(m); HNF-1beta(m); HNF-1beta(r); HNF-1alpha(r)
V$E4F1_Q6 (M00694)															3.95				SYTACGTCAC	E4F1	E4F1(h)
V$ARP1_01 (M00155)															3.79				TGARCCYTTGAMCCCW	ARP-1 (COUP-TF2)	COUP-TF2(h)
V$CMYB_01 (M00004)															3.73				NCNRNNGRCNGTTGGKGG	c-Myb	c-Myb(m)
V$MYOGNF1_01 (M00056)														2	3.6				CRSCTGTBBNNTTTGGCACBSNGCCARCH	myogenin / NF-1	NF-1(h); NF-1A1(c); NF-1(r); NF-1/L(r); NF-1B2(c); NF-1C2(c); NF-1B1(c); NF-1(fc); NF-1(mo); NF-1(XEN); NF-1(m); NF-1(HA); NF-1(s); NF-1(pg); NF-1/Red1(HA); NF-1X(HA)
V$HNF4_01 (M00134)														3	3.48				NNNRGGNCAAAGKTCANNN	HNF4	HNF-4alpha2(h); HNF-4alpha1(r)
V$LEF1_Q6 (M00745)														2	3.48				SWWCAAAGGG	LEF1	LEF-1(z); LEF-1(x); LEF-1(h); LEF-1(r); LEF-1(m); LEF-1(c)
V$MAZR_01 (M00491)																	7.01		NSGGGGGGGGMCN	MAZR	MAZR(m); PATZ(h)
V$CREL_01 (M00053)																7	6		SGGRNTTTCC	c-Rel	c-Rel(h); c-Rel(c); c-Rel(m)
V$E2_Q6 (M00181)																	5.85		NNACCRNNANCGGTRN	E2	E2(BPV1)
V$ICSBP_Q6 (M00699)																6	5.3		RAARTGAAACTG	ICSBP	IRF-8(h); IRF-8(c); IRF-8(m)
V$GFI1_01 (M00250)																	4.9		NNNNNNNAAATCACWGYNNNNNNN	Gfi-1	Gfi1(r)
V$E2F1DP1RB_01 (M00740)																	4.78		TTTSGCGC	Rb:E2F-1:DP-1	pRb(h):E2F-1(h):DP-1(h)
V$E2F_Q4_01 (M00919)																	4.72		NCSCGCSAAAN	E2F	E2F-3a(h); E2F-4(h); E2F(m); E2F(r); E2F(h):DP(h); E2F(h):DP(h):E4(AD5); DP-1(h); E2F-1(m); E2F-1(h)
V$E2F4DP1_01 (M00738)																	4.67		TTTSGCGC	E2F-4:DP-1	E2F-4(h):DP-1(h)
V$E2F_Q3 (M00425)																	4.67		TTTCGCGC	E2F	E2F(h):DP(h)
V$E2F_02 (M00050)																	4.67		TTTSGCGC	E2F	E2F-2(h); E2F-3a(h); E2F-4(h); E2F(h):DP(h); E2F-5(h); E2F-1(m); E2F-1(h)
V$MEF2_Q6_01 (M00402)																	4.61		RGCTATWTTTAR	MEF-2	MEF-2A(r); aMEF-2(h); MEF2A-isoform1(h); MEF-2DAB(h); MEF-2C/delta8(m); Mef-2A1(m)
V$MYCMAX_B (M00322)																	4.49		GCCAYGYGSN	c-Myc:Max	Max-isoform2(h); Max-isoform1(h); c-Myc(c); c-Myc(h); c-Myc(m); c-Myc(r)
V$E2F1_Q3_01 (M00938)																	4.49		TTGGCGCGRAANNGNM	E2F-1	E2F-1(h)
V$MAZ_Q6 (M00649)																	4.38		GGGGAGGG	MAZ	MAZ(m); MAZ(h); MAZ(gl)
V$SMAD4_Q6 (M00733)																	4.31		GKSRKKCAGMCANCY	SMAD4	Smad4(pg); Smad4(h); Smad4(r); Smad4(z); Smad4(m)
V$CEBPGAMMA_Q6 (M00622)																	4.26		CTBATTTCARAAW	C/EBPgamma	C/EBPgamma(h); C/EBPgamma(m); C/EBPgamma(r)
V$SP3_Q3 (M00665)																	3.84		ASMCTTGGGSRGGG	Sp3	Sp3(h); Sp3-isoform1(h); Sp3(c); Sp3(r)
V$E2F1_Q4_01 (M00939)																	3.84		TTTSGCGSG	E2F-1	E2F-3a(h); E2F-4(h); E2F(m); E2F(r); E2F(h):DP(h); E2F(h):DP(h):E4(AD5); DP-1(h); E2F-1(m); E2F-1(h)
V$GATA1_03 (M00127)																	3.84		RNSNDGATTANNGN	GATA-1	GATA-1(h); GATA-1 isoform 1(h); GATA-1A(x); GATA-1(c); GATA-1(m)
V$E2F_03 (M00516)																	3.84		TTTSGCGCGMNR	E2F	E2F-1(r); E2F(m); E2F(r); E2F(h):DP(h); E2F-1(m); E2F-1(h)
V$ATF4_Q2 (M00514)																	3.6		CVTGACGYMABG	ATF4	ATF-4(h); ATF4(m); ATF4 (381AA)(m)
V$WHN_B (M00332)																	3.48		ANNGACGCTNN	Whn	FOXN1(m); FOXN1(h)
V$IK1_01 (M00086)																	3.48		NHNTGGGAATRCC	Ik-1	Ik-1(m)
V$CREB_Q4_01 (M00917)																	3.48		CNNTGACGTMA	CREB	CREB1(b); deltaCREB(h); CREB(h); CREB(HA); CREB(mv); CREMtaualpha(m); CREMbeta(m); CREMtau1(m); CREMtau2(m); CREMtau(m); CREMalpha(m); CREMgamma(m); deltaCREB(r); CREB1(r); CREBbeta(m); CREB(m); CREMalpha(h); CREMtau(r)
	Hitting set membership
	1-HS
	2-HS
	3-HS

## Sheet: UpDown
		Significance of association (-log(p-value))
TRANSFAC binding motiff			down-regulated in Control samples								up-regulated in Control samples
		C/PP	C/RR	C/SP	C/PP+C/SP	C/PP+C/RR	C/RR+C/SP	C/PP+C/RR+C/SP		C/PP	C/RR	C/SP	C/PP+C/SP	C/PP+C/RR	C/RR+C/SP	C/PP+C/RR+C/SP		Binding Sequence	Factor name	Binding factor
V$YY1_02 (m00069)		8.56	3.6		9.01	10.06	4.43	11.01										NNNCGGCCATCTTGNCTSNW	YY1	YY1(h); YY1(m)
V$ER_Q6 (m00191)		6.94	5.18		6.42	8.5	5.13	8.1				5.18	3.79			3.54		NNARGNCANNNTGACCYNN	ER	ER-alpha(h); ER-alpha-L(h); ER-alpha(c); ER-alpha(m); ER-alpha(r)
V$TEL2_Q6 (m00678)		5.79				5.69												YTACTTCCTG	Tel-2	Tel-2a(h); Tel-2c(h); Tel-2b(h)
V$CDX2_Q5 (m00729)						5.46		5.4										ANANTTTTATKRCC	Cdx-2	Cdx-3(gl); Cdx-2(m)
V$CREBP1_Q2 (m00179)			4.72	11.01	7.68	4.96	11.01	11.52										VGTGACGTMACN	ATF2	ATF-2-xbb4(h); CRE-BP1(m)
V$E2_01 (m00107)			3.48			4.26	4.84	5.51										NNACCRNNANCGGTRN	E2	E2(BPV1)
V$CEBPGAMMA_Q6 (m00622)			3.6			4.14	4.02	4.78										CTBATTTCARAAW	C/EBPgamma	C/EBPgamma(h); C/EBPgamma(m); C/EBPgamma(r)
V$HNF3B_01 (m00131)		3.48				4.02												KGNANTRTTTRYTTW	HNF3beta	HNF-3beta(r)
V$PIT1_Q6 (m00802)						4.02												NMTTCATAAWTATWNMNA	Pit-1	Pit-1B(h); Pit-1(m); Pit-1B(r); Pit-1A(r); Pit-1-xbb3(r)
V$E2F_Q3_01 (m00918)		3.73				3.89					3.6			5.85		5.13		TTTSGCGSG	E2F	E2F-3a(h); E2F-4(h); E2F(m); E2F(r); E2F(h):DP(h); E2F(h):DP(h):E4(AD5); DP-1(h); E2F-1(m); E2F-1(h)
V$GATA_C (m00203)		4.49				3.84												NGATAAGNMNN	GATA-X	GATA-1(h); GATA-1 isoform 1(h); GATA-3 isoform-1(h); GATA-3(c); GATA-2(c); GATA-2(h); GATA-3(m); GATA-3(fc); GATA-1A(x); GATA-2(x); GATA-3(x); GATA-2(m); GATA-1(c); GATA-1(m)
V$EBF_Q6 (m00977)						3.84		4.49										KTCCCYWGRGA	EBF	COE3(m); COE2(m); EBF1-L(m); Olf-1(r)
V$GATA1_03 (m00127)		7.13				3.79												RNSNDGATTANNGN	GATA-1	GATA-1(h); GATA-1 isoform 1(h); GATA-1A(x); GATA-1(c); GATA-1(m)
V$TANTIGEN_B (m00330)						3.66												RGGAGGCAGAGGCAGGYGG	Major T-antigen
V$CAAT_01 (m00254)			4.14	3.6		3.54	5.3	4.43			4.31				4.72			NNNRRCCAATSA	CCAAT box
V$POU6F1_01 (m00465)						3.48												GCATAAWTTAT	POU6F1	POU6F1 (c2)(m)
V$SRF_01 (m00152)		5.9			4.49													ATGCCCATATATGGWNNT	SRF	SRF-L(m); SRF(h); SRF(r); SRF(fc); SRF(c)
V$FOXD3_01 (m00130)		5.85			3.48							3.48						NAWTGTTTRTTT	FOXD3	FOXD3(h); FOXD3(m); FOXD3(r)
V$MEF2_Q6_01 (m00941)		4.96																RGCTATWTTTAR	MEF-2	MEF-2A(r); aMEF-2(h); MEF2A-isoform1(h); MEF-2DAB(h); MEF-2C/delta8(m); Mef-2A1(m)
V$FOXO4_01 (m00472)		4.49																RWAAACAANNN	FOXO4	FOXO4(m); FOXO4(h)
V$HFH3_01 (m00289)		4.49																KNNTRTTTRTTTA	HFH3 (FOXI1)	FOXI1(h); HFH-3(r); HFH-3(m)
V$FOXJ2_01 (m00422)		4.26																NNNWAAAYAAAYANNNNN	FOXJ2	FOXJ2(m); FOXJ2 (long isoform)(h)
V$COMP1_01 (m00057)		3.95		4.56	5.94			4.02										NVTNWTGATTGACNACAAVARRBN	COMP1	COMP1(m)
V$FOX_Q2 (m00809)		3.79																KATTGTTTRTTTW	FOX factors	FOXH1(m); FOXJ1a(h); FOXJ1b(h); FOXF2(h); FOXD3(h); FOXD3(m); FOXF1(h); FOXD3(r); FOXJ1(m); FOXJ1(r); FOXF1(m); FOXF2(m)
V$CDPCR1_01 (m00104)		3.66																NATCGATCGS	CDP CR1	CDP(h); CDP-isoform1(h)
V$E2F1_Q6_01 (m00940)		3.6											3.6					NTTTCGCGCS	E2F-1	E2F-1(m); E2F-1(h)
V$NRF1_Q6 (m00652)		3.6																CGCATGCGCR	NRF-1	NRF-1(h); NRF-1(mo)
V$MTATA_B (m00320)		3.54																CBNTATAAANCNCNVSS	Muscle TATA box
V$PR_02 (m00957)		3.54																NNNNNNRGNACNNKNTGTTCTNNNNNN	PR	PR(h)
V$TITF1_Q3 (m00432)			5.85				3.89											ASTCAAGTRK	TTF1 (Nkx2-1)	Nkx2-1(m); Nkx2-1(c); Nkx2-1(b); Nkx2-1(ca); Nkx2-1(r); Nkx2-1(h); Nkx2-1-isoform1(h)
V$NFKAPPAB65_01 (m00052)			4.72				4.2				4.96				5.9			GGGRATTTCC	NF-kappaB (p65)	RelA-p65(h); RelA-p65(m)
V$NFKB_Q6_01 (m00774)			4.38	3.73			6.05											NNNNKGGRAANTCCCN	NF-kappaB	NF-kappaB(r); NF-kappaB(m); NF-kappaB(h); NF-kappaB(rb); p100(c); RelA-p65(h); NF-kappaB2-p52(h); NF-kappaB(-like)(h); NF-kappaB(-like)(m); NF-TNF(m); NF-TNF(r); p105(m); p50(m); NF-kappaB2 (p49)(h); NF-kappaB2-p100(h); RelA-p65(m); p50(r); p105(r); RelA-p65(r); p50(h); NF-kappaB1(h)
V$AIRE_01 (m00999)			4.31															WTNNNWNNTGGWWNNNWNGGNNWNWN	AIRE	AIRE(h); AIRE-isoform1(h)
V$LHX3_01 (m00510)			3.95				5.46	3.95										AATTAATTAA	Lhx3	Lhx3a(m); Lhx3b(m); LHX3a(h); LHX3b(h)
V$ATF_B (m00338)			3.6	7.94	4.72		8.42	7.46							4.72			NTGACGTCANYS	ATF	ATF(h)
V$KROX_Q6 (m00982)										6.11	8.1		5.9	12.62	7.18	11.93		CCCGCCCCCRCCCC	KROX	Egr-1(h); Egr-3(h); Egr-4(h); Egr-2(h); Egr-3(m); Egr-1(mo); Egr-2(m); Egr-1(m); Egr-4(r); Egr-1(r)
V$VMYB_01 (m00003)										7.23			6.05	8.62		7.94		AATAACGGNA	v-Myb	v-Myb(AMV)
V$E2F1_Q3_01 (m00938)											7.28			8.01	6.78	6.72		TTGGCGCGRAANNGNM	E2F-1	E2F-1(h)
V$E2F1_Q6 (m00431)										3.84	6.17		3.54	7.4	5.24	5.94		TTTSGCGS	E2F-1	E2F-1(m); E2F-1(h)
V$SP3_Q3 (m00665)											4.38			6.78	4.02	6.61		ASMCTTGGGSRGGG	Sp3	Sp3(h); Sp3-isoform1(h); Sp3(c); Sp3(r)
V$E2F1_Q4 (m00430)										6.61			5.36	6.42		5.56		NTTSGCGG	E2F-1	E2F-1(m)
V$E2F_Q4 (m00426)										3.73	4.14		3.54	5.9	4.14	5.08		TTTSGCGS	E2F	E2F(h):DP(h)
V$CREBATF_Q6 (m00981)										5.79			6.52	5.74		6.52		NTGACGTNA	CREB, ATF	ATF6(h); ATF(h); ATF3(h); ATF3(m); ATF3(r); ATF-4(h); ATF4(m); ATF4 (381AA)(m); ATF5(h); deltaCREB(h); CREB(h); ATF-a(h); ATFa-isoform1(h); CREMtaualpha(m); CREMbeta(m); CREMtau1(m); CREMtau2(m); CREMtau(m); CREMalpha(m); CREMgamma(m); ATF-like(XEN); 47-kDa CRE bind. prot.(r); ATF/CREB(GIB); 120-kDa CRE-binding protein(h); ATF-1(h); ATF-1(m); ATF-2(h); ATF-2-xbb4(h); deltaCREB(r); CREB1(r); CRE-B…
V$E2F4DP2_01 (m00739)											6.11			5.56	3.79	3.95		TTTCSCGC	E2F-4:DP-2	E2F-4(h):DP-2(h)
V$PITX2_Q2 (m00482)											3.66			5.46		4.96		WNTAATCCCAR	Pitx2	PITX2(h); PITX2A(h); Pitx2(m)
V$CREB_Q4_01 (m00917)										4.08			4.9	5.08		6.42		CNNTGACGTMA	CREB	CREB1(b); deltaCREB(h); CREB(h); CREB(HA); CREB(mv); CREMtaualpha(m); CREMbeta(m); CREMtau1(m); CREMtau2(m); CREMtau(m); CREMalpha(m); CREMgamma(m); deltaCREB(r); CREB1(r); CREBbeta(m); CREB(m); CREMalpha(h); CREMtau(r)
V$E2F1_Q4_01 (m00939)											5.94			4.96	6	4.31		TTTSGCGSG	E2F-1	E2F-3a(h); E2F-4(h); E2F(m); E2F(r); E2F(h):DP(h); E2F(h):DP(h):E4(AD5); DP-1(h); E2F-1(m); E2F-1(h)
V$CDP_01 (m00095)														4.78		3.54		CCAATAATCGAT	CDP	CDP(h); CDP-isoform1(h)
V$OCT1_02 (m00136)				4.26										4.61		4.78		NNGAATATKCANNNN	OCT1	POU2F1(h); Oct-1(r); POU2F1(mo); POU2F1(GIB); POU2F1(ha); POU2F1(c); POU2F1(x); POU2F1a(m)
V$MAZR_01 (m00491)										5.4			7.23	4.56		6.34		NSGGGGGGGGMCN	MAZR	MAZR(m); PATZ(h)
V$ELK1_02 (m00025)											4.96			4.38	5.63	5.74		NNNNCCGGAARTNN	Elk-1	Elk-1(h); Elk-1-isoform1(h)
V$CREB_Q2_01 (m00916)										4.31			4.84	4.02		5.01		NNTKACGTCANNNS	CREB	CREB1(b); deltaCREB(h); CREB(h); CREB(HA); CREB(mv); CREMtaualpha(m); CREMbeta(m); CREMtau1(m); CREMtau2(m); CREMtau(m); CREMalpha(m); CREMgamma(m); deltaCREB(r); CREB1(r); CREBbeta(m); CREB(m); CREMalpha(h); CREMtau(r)
V$E2F_Q4_01 (m00919)											5.24			4.02	5.79	3.89		NCSCGCSAAAN	E2F	E2F-3a(h); E2F-4(h); E2F(m); E2F(r); E2F(h):DP(h); E2F(h):DP(h):E4(AD5); DP-1(h); E2F-1(m); E2F-1(h)
V$ELF1_Q6 (m00746)										3.54				3.73				RNWMBAGGAART	Elf-1	Elf-1(m); Elf-1(r); ELF-1(h)
V$CREB_Q2 (m00177)				4.96			4.9				4.78			3.66	6.24	5.18		NSTGACGTAANN	CREB	CREB1(b); CREB(h); CREB(HA); CREB(mv); CREB1(r); CREB(m)
V$HNF1_C (m00206)											4.9			3.54	5.3	4.43		DGTTAATKAWTNACCAM	HNF1	HNF-1alpha-A(h); HNF-1alpha(m); HNF-1alpha(r)
V$BARBIE_01 (m00238)				3.6										3.54				ATNNAAAGCNGGNGG	Barbie Box
V$E2F_Q6_01 (m00920)											4.67			3.48	4.67			NKCGCGCSAAAN	E2F	E2F-3a(h); E2F-4(h); E2F(m); E2F(r); E2F(h):DP(h); E2F(h):DP(h):E4(AD5); E2F-1(h):DP-1(h); DP-1(h); E2F-7(h); E2F-7(m); E2F-1(m); E2F-1(h)
V$COUP_01 (m00158)										7.34			5.36					TGAMCTTTGMMCYT	COUP-TF, HNF-4	HNF-4alpha2(h); COUP-TF1(h); HNF-4alpha1(r); COUP(r); COUP-TF1(c); COUP-TF1(m)
V$PAX9_B (m00239)							3.95			6.17			6.72					SNNTRAGGTCACGSNN	v-ErbA	v-ErbA(AEV)
V$DEC_Q1 (m00997)										6.11			4.72					SCCCAMGTGAAGN	DEC	Stra13(m); DEC1(h); DEC2(h); DEC2(m); DEC1(r); DEC2(r)
V$CHOP_01 (m00249)										5.85			5.18					NNRTGCAATMCCC	CHOP:C/EBPalpha	C/EBPalpha(c); C/EBP(x); CHOP-10(m); CHOP-10(h); C/EBPalpha(m); CHOP-10(lh); C/EBPalpha(r); C/EBPalpha(h)
V$SF1_Q6 (m00727)										4.84		5.24	7.79			5.69		TGRCCTTG	SF1	SF-1(z); SF-1(r); SF-1(b); SF-1(h); SF-1(pg); SF-1 isoform2(m); SF-1(c); SF-1(ol); SF-1(FROG); SF-1(TURTLE)
V$HNF6_Q6 (m00639)										4.61			4.96			3.48		HWAAATCAATAW	HNF6	HNF-6alpha(r); HNF-6beta(r); HNF-6alpha(h); HNF-6(m); OC-2(h)
V$OSF2_Q6 (m00731)										4.26								ACCACANM	Osf2	AML3(h); AML3-isoform2(h); RUNX2-isoform2(m); AML3(r)
V$NKX25_01 (m00240)										3.95								TYAAGTG	Nkx2-5	CSX(m)
V$R_01 (m00649)										3.54								GGGGAGGG	MAZ	MAZ(m); MAZ(h); MAZ(gl)
V$E2F1DP1_01 (m00736)											5.3	3.84			5.94			TTTCSCGC	E2F-1:DP-1	E2F-1(h):DP-1(h)
V$ZTA_Q2 (m00711)							3.48				5.01				5.9			TNACNNTKRCWCA	Zta	Zta(EBV)
V$NFY_01 (m00287)				5.9							4.2							NNNRRCCAATSRGNNN	NF-Y	CBF(2)(r); NF-Y(h); NF-Y(m)
V$CREB_Q4 (m00178)				6.94	4.9		5.3	5.69			3.84				3.95			NSTGACGTMANN	CREB	CREB1(b); CREB(h); CREB(HA); CREB(mv); CREB1(r); CREB(m)
V$GATA2_02 (m00348)												3.48						NNWGATAASA	GATA-2	GATA-2(c)
V$GATA3_03 (m00351)												3.54						ANAGATMWWA	GATA-3	GATA-3(c)
V$PPARA_02 (m00518)												3.6						NNRGGTCATWGGGGTSANG	PPARalpha:RXRalpha	PPARalpha(h); RXR-alpha(h); PPARalpha(m); PPARalpha(x); RXR-alpha(x); RXR-alpha(m); RXR-alpha(r); PPARalpha(r)
V$GATA1_06 (m00347)												3.66						MNAGATAANR	GATA-1	GATA-1(c)
V$IRF_Q6 (m00772)												3.66						BNCRSTTTCANTTYY	IRF	IRF-3(h); IRF-7H(h); IRF-7A(h); IRF-4(h); IRF-5(h); IRF-5(m); IRF-6(x); IRF-6(h); IRF-6(m); IRF-3(c); IRF-3(m); IRF-7(m); IRF-10(c); IRF-8(h); IRF-8(c); IRF-2(c); IRF-1(c); IRF-4(m); IRF-1(m); IRF-1(r); IRF-1(h); IRF-8(m); IRF-2(h); IRF-2(m)
V$LMO2COM_02 (m00278)												3.73						NMGATANSG	Lmo2 complex	RBTN2-isoform1(h); RBTN2(m)
V$NRSE_B (m00325)												3.79						TTYAGCWCCDCGGASAGYRCC	NRSE	REST(m); REST-form2(h); REST-form1(h)
V$HNF1_Q6 (m00790)					4.43							3.89						WRGTTAATNATTAACNNN	HNF1	HNF-1alpha-B(h); HNF-1alpha-C(h); HNF-1alpha-A(h); HNF-1beta-C(h); HNF-1beta-B(h); HNF-1beta-A(h); HNF-1alpha(pg); HNF-1alpha(c); HNF-1beta(pg); HNF-1alpha(m); HNF-1beta(m); HNF-1beta(r); HNF-1alpha(r)
V$SRF_Q4 (m00810)												3.95						SCCAWATAWGGMNMNNNN	SRF	SRF(m); SRF-I(m); SRF-L(m); SRF-M(m); SRF-S(m); SRF(h); SRF(r)
V$AML_Q6 (m00769)												4.02						NNGKNTGTGGTTWNC	AML	AML1(h); AML1b(h); AML1c(h); AML1a(h); AML2(h); AML3(h); AML3-isoform2(h); AML3-isoform1(h); PEBP2alphaB1(m); PEBP2alphaB2(m); PEBP2alphaA1(m); PEBP2alphaA2(m); RUNX2-isoform2(m); AML1(r); AML3(r); AML1(GIB); PEBP2beta(m)
V$ATF1_Q6 (m00691)				5.69								4.14	4.31					CYYTGACGTCA	ATF1	ATF-1(h); ATF-1(m)
V$TAXCREB_01 (m00114)												4.26						GGGGGTTGACGYANA	Tax/CREB	deltaCREB(h); CREB(h); Tax(HT1); deltaCREB(r); CREB1(r); deltaCREB(m); CREB(m)
V$LXR_DR4_Q3 (m00766)												4.31						TGACCGNNAGTRACCC	LXR direct repeat 4	LXR-alpha(m):RXR-alpha(m); LXR-alpha(h):RXR-alpha(h); LXR-beta(h):RXR-alpha(h); LXR-alpha(r):RXR-alpha(r)
V$SMAD4_Q6 (m00733)												4.56						GKSRKKCAGMCANCY	SMAD4	Smad4(pg); Smad4(h); Smad4(r); Smad4(z); Smad4(m)
V$NFKAPPAB_01 (m00054)												4.96						GGGAMTTYCC	NF-kappaB	NF-kappaB(r); NF-kappaB(m); NF-kappaB(h); RelA-p65(h); p50(h)
V$HNF4_01_B (m00411)												5.01						NRGGNCAAAGGTCAN	HNF4alpha1	HNF-4alpha1(r)
V$IPF1_Q4 (m00436)													3.48			3.66		GHNNTAATGACM	IPF1	IPF1(h); IPF1(m); IPF1(r); IPF1(gl); IPF1(x)
V$AP1_Q2 (m00173)													4.61					RSTGACTNANW	AP-1	AP-1(h); AP-1(XEN); AP-1(mo); AP-1(r); AP-1(m); AP-1(HA); AP-1(c); AP-1(GIB)
V$TCF11MAFG_01 (m00284)													5.51					NNNNNATGACTCAGCANTTNNG	TCF11:MafG	LCR-F1(h); MafG(c)
V$MAZ_Q6 (m00649)															3.73			GGGGAGGG	MAZ	MAZ(m); MAZ(h); MAZ(gl)
V$IK3_01 (m00088)															4.08			TNYTGGGAATACC	Ik-3	Ik-3(m)
V$TFIIA_Q6 (m00707)															5.24			TMTRWRAGGRSS	TFIIA	TFIIA(h); TFIIA-alpha/beta precursor (minor)(h); TFIIA-alpha/beta precursor (major)(h); TFIIA-gamma(h)
V$CDPCR3HD_01 (m00106)				3.6														NATYGATSSS	CDP CR3+HD	CDP(h); CDP-isoform1(h)
V$CETS168_Q6 (m00743)				3.79														CMGGAAGY	c-Ets-1 68	c-Ets-1 68(c)
V$CP2_01 (m00072)				4.02														GCHCDAMCCAG	CP2	CP2(m)
V$EVI1_04 (m00081)				4.2														DGATADGAHWAGATA	Evi-1	Evi-1(m)
V$OLF1_01 (m00261)				4.2														NNCDABTCCCYAGRGARBNKGN	Olf-1	Olf-1(r)
V$E2F1DP1RB_01 (m00740)				4.26														TTTSGCGC	Rb:E2F-1:DP-1	pRb(h):E2F-1(h):DP-1(h)
V$ATF_01 (m00017)				4.61														CNSTGACGTNNNYC	ATF	ATF(h)
V$ATF3_Q6 (m00513)				4.96														CBCTGACGTCANCS	ATF3	ATF3(h); ATF3(m); ATF3(r)
V$CREB_01 (m00039)				6.3			4.9	3.54										TGACGTMA	CREB	deltaCREB(h); CREB(h); deltaCREB(r); CREB1(r); deltaCREB(m); CREB(m)
V$CREBP1CJUN_01 (m00041)				10.32	5.18		9.04	7.05										TGACGTYA	ATF2:c-Jun	c-Jun(c); c-Jun(h); c-Jun(r); ATF-2-xbb4(h); c-Jun(m)
V$IRF2_01 (m00063)					4.26													GAAAAGYGAAASY	IRF-2	IRF-2(m)
V$ELK1_01 (m00007)							3.79											NAAACMGGAAGTNCVH	Elk-1	Elk-1(h); Elk-1-isoform1(h)
V$NFKAPPAB50_01 (m00051)							3.79											GGGGATYCCC	NF-kappaB (p50)	p50(h)
V$E2_Q6_01 (m00928)							5.56	4.49										TNTACCGKKWYCGGTK	E2	E2(BPV1)
V$AFP1_Q6 (m00616)								4.08										ATTAAYTRCAC	AFP1	AFP1(h)
V$CREL_01 (m00053)																3.48		SGGRNTTTCC	c-Rel	c-Rel(h); c-Rel(c); c-Rel(m)
V$E2_Q6 (m00181)								3.89										NNACCRNNANCGGTRN	E2	E2(BPV1)
V$HEN1_01 (m00068)								3.66										NNNGGNCNCAGCTGCGNCCCNN	HEN1	HEN1(r)
V$NKX61_01 (m00424)								3.6										TWTTTAATTGGTT	Nkx6-1	Nkx6-1(m); Nkx6-1(gl); Nkx6-1(c); Nkx6-1(h); Nkx6-1(r)

## Sheet: Clusters
		Significance of association (-log(p-value))
TRANSFAC motifs		final_0		final_1		final_10		final_106		final_12		final_18		final_19		final_2		final_25		final_26		final_40		final_47		final_53		final_6		final_63		HS			Binding sequence	Factor name	Binding factor
V$HEN1_01 (M00068)			6.24																																NNNGGNCNCAGCTGCGNCCCNN	HEN1	HEN1(r)
V$SREBP1_01 (M00220)		1	5.13																																NATCACGTGAY	SREBP-1	SREBP-1a(h); SREBP-1b(h); SREBP-1c(h); SREBP-1(ha); SREBP-1c(r)
V$FREAC3_01 (M00291)			4.9																																NNNNNGTAAATAAACA	Freac-3	FOXC1(h)
V$EFC_Q6 (M00626)			4.67																																MRWYRCYAKGSAAM	RFX1 (EF-C)	RFX5(h):RFXAP(h):RFXANK(h); RFX1(h); RFX1(m); RFX1(r)
V$MEF2_Q6_01 (M00402)		1	4.2																																RGCTATWTTTAR	MEF-2	MEF-2A(r); aMEF-2(h); MEF2A-isoform1(h); MEF-2DAB(h); MEF-2C/delta8(m); Mef-2A1(m)
V$MINI20_B (M00324)		1	4.14	7	10.32																					7	4.9								NNNNGVCNCCAYNCMRSNGSM	Muscle initiator sequence-20
V$MTF1_Q4 (M00650)			3.95																																TBTGCACHCGGCCC	MTF-1	MTF-1(h); MTF-1(m)
V$OSF2_Q6 (M00731)			3.79																																ACCACANM	Osf2	AML3(h); AML3-isoform2(h); RUNX2-isoform2(m); AML3(r)
V$NFMUE1_Q6 (M00651)			3.73		5.79																3.73		6.42												CGGCCATCT	NF-muE1	NF-muE1(h)
V$HFH3_01 (M00289)			3.6																								3.89								KNNTRTTTRTTTA	HFH3 (FOXI1)	FOXI1(h); HFH-3(r); HFH-3(m)
V$IRF_Q6_01 (M00972)			3.54								3.48					4	4.31																		RAAANTGAAAN	IRF	IRF-3(h); IRF-7H(h); IRF-7A(h); ISGF-3(m); ISGF-3(h); IRF-4(h); IRF-5(h); IRF-5(m); IRF-3(c); IRF-3(m); IRF-7(m); IRF-10(c); IRF-8(h); IRF-9(h); IRF-8(c); IRF-2(c); IRF-1(c); IRF-4(m); IRF-9(m); IRF-1(m); IRF-1(r); IRF-1(h); IRF-8(m); IRF-2(h); IRF-2(m)
V$HEN1_02 (M00058)			3.48																																NNGGGNCGCAGCTGCGNCCCNN	HEN1	HEN1(r)
V$SOX5_01 (M00042)				5	11.93														7.23								3.54								NNAACAATNN	SOX5	Sox5(m)
V$CREBATF_Q6 (M00981)				4	11.52		4.96										9.01																5.46		NTGACGTNA	CREB, ATF	ATF6(h); ATF(h); ATF3(h); ATF3(m); ATF3(r); ATF-4(h); ATF4(m); ATF4 (381AA)(m); ATF5(h); deltaCREB(h); CREB(h); ATF-a(h); ATFa-isoform1(h); CREMtaualpha(m); CREMbeta(m); CREMtau1(m); CREMtau2(m); CREMtau(m); CREMalpha(m); CREMgamma(m); ATF-like(XEN); 47-kDa CRE bind. prot.(r); ATF/CREB(GIB); 120-kDa CRE-binding protein(h); ATF-1(h); ATF-1(m); ATF-2(h); ATF-2-xbb4(h); deltaCREB(r); CREB1(r); CRE-B…
V$CREB_Q2_01 (M00916)				1	10.32	4	5.24									6	7.73															7	9.63		NNTKACGTCANNNS	CREB	CREB1(b); deltaCREB(h); CREB(h); CREB(HA); CREB(mv); CREMtaualpha(m); CREMbeta(m); CREMtau1(m); CREMtau2(m); CREMtau(m); CREMalpha(m); CREMgamma(m); deltaCREB(r); CREB1(r); CREBbeta(m); CREB(m); CREMalpha(h); CREMtau(r)
V$CREB_Q4_01 (M00917)					9.63		3.54										11.93															4	7.23		CNNTGACGTMA	CREB	CREB1(b); deltaCREB(h); CREB(h); CREB(HA); CREB(mv); CREMtaualpha(m); CREMbeta(m); CREMtau1(m); CREMtau2(m); CREMtau(m); CREMalpha(m); CREMgamma(m); deltaCREB(r); CREB1(r); CREBbeta(m); CREB(m); CREMalpha(h); CREMtau(r)
V$E2F_Q6 (M00427)				6	8.33	6	5.13									4	6.3					7	5.63										4.26		TTTSGCGS	E2F	E2F(h):DP(h)
V$E2F1_Q3_01 (M00938)				6	8.24		3.6										6.84																		TTGGCGCGRAANNGNM	E2F-1	E2F-1(h)
V$ELK1_02 (M00025)				7	7.18	7	5.18										3.6					6	5.63				3.79	1	4.2						NNNNCCGGAARTNN	Elk-1	Elk-1(h); Elk-1-isoform1(h)
V$E2F1_Q6 (M00431)				4	7.05						4.31					7	7.68	6	3.95			4	7.01										7.13		TTTSGCGS	E2F-1	E2F-1(m); E2F-1(h)
V$ELK1_01 (M00007)					6.72																3.48		4.61								3.66				NAAACMGGAAGTNCVH	Elk-1	Elk-1(h); Elk-1-isoform1(h)
V$CDX2_Q5 (M00729)				6	6.65																						3.79			4	4.02				ANANTTTTATKRCC	Cdx-2	Cdx-3(gl); Cdx-2(m)
V$E2F1_Q4 (M00430)				4	6.34					2	3.79						6.57										4.38								NTTSGCGG	E2F-1	E2F-1(m)
V$SOX9_B1 (M00410)					6.34																		3.84												NNNNAACAATRGNN	SOX9	Sox9(h)
V$YY1_02 (M00069)					6.3														3.6																NNNCGGCCATCTTGNCTSNW	YY1	YY1(h); YY1(m)
V$CREBP1_Q2 (M00179)					6																												6.94		VGTGACGTMACN	ATF2	ATF-2-xbb4(h); CRE-BP1(m)
V$MYCMAX_B (M00322)					5.85				3.6			7	5.24												3.48										GCCAYGYGSN	c-Myc:Max	Max-isoform2(h); Max-isoform1(h); c-Myc(c); c-Myc(h); c-Myc(m); c-Myc(r)
V$E2F1DP1_01 (M00736)					5.74								3.54				4.38															5	12.62		TTTCSCGC	E2F-1:DP-1	E2F-1(h):DP-1(h)
V$E2F_Q3_01 (M00918)					5.63					2	5.08						8.5																4.78		TTTSGCGSG	E2F	E2F-3a(h); E2F-4(h); E2F(m); E2F(r); E2F(h):DP(h); E2F(h):DP(h):E4(AD5); DP-1(h); E2F-1(m); E2F-1(h)
V$WHN_B (M00332)					5.3		3.6										3.89						4.14												ANNGACGCTNN	Whn	FOXN1(m); FOXN1(h)
V$E2F_Q4 (M00426)					4.78												10.54										5.18						6		TTTSGCGS	E2F	E2F(h):DP(h)
V$CEBPDELTA_Q6 (M00621)				4	4.67														6.84																MATTKCNTMAYY	C/EBPdelta	C/EBPdelta(m); C/EBPdelta(h); C/EBPdelta(r)
V$CREB_Q2 (M00177)					4.61																												4.67		NSTGACGTAANN	CREB	CREB1(b); CREB(h); CREB(HA); CREB(mv); CREB1(r); CREB(m)
V$CETS1P54_01 (M00032)					4.56		3.84								4.38								4.9							7	5.69				NCMGGAWGYN	c-Ets-1(p54)	c-Ets-1(m)
V$NRF1_Q6 (M00652)					4.56	4	4.38		4.08																										CGCATGCGCR	NRF-1	NRF-1(h); NRF-1(mo)
V$TATA_C (M00216)					4.56																4.2														NCTATAAAAR	TATA	TFIID(h); TFIID(c); TFIID(m); TFIID(r); TBP(h); TBP(m)
V$CDPCR1_01 (M00104)					4.31			3	4.08														4.2	7	4.84										NATCGATCGS	CDP CR1	CDP(h); CDP-isoform1(h)
V$E2F1_Q6_01 (M00940)					4.31						4.31					4	10.54						5.51									2	9.45		NTTTCGCGCS	E2F-1	E2F-1(m); E2F-1(h)
V$E2F1DP2_01 (M00737)					4.2												4.31																6.05		TTTSSCGC	E2F-1:DP-2	E2F-1(h):DP-2(h)
V$GATA1_05 (M00346)					3.66																														NCWGATAACA	GATA-1	GATA-1(h); GATA-1 isoform 1(h); GATA-1A(x); GATA-1(c); GATA-1(m)
V$FOXO4_01 (M00472)					3.54			2	3.79									7	5.4																RWAAACAANNN	FOXO4	FOXO4(m); FOXO4(h)
V$E2F4DP2_01 (M00739)					3.54												7.23															4	12.62		TTTCSCGC	E2F-4:DP-2	E2F-4(h):DP-2(h)
V$NRF2_01 (M00108)							10.54																						5.51		6.94				ACCGGAAGNG	NRF-2/GABP	GABP(mo); GABP(r)
V$GABP_B (M00341)							7.68																4.2								3.48				VCCGGAAGNGCR	GABP	GABP-alpha(h):GABP-beta(h); GABP-alpha(m):GABP-beta(m); GABP-alpha(h); GABP-beta1(h); GABP-beta2(h); GABP-alpha(m)
V$CETS168_Q6 (M00743)						7	6.05															4	5.51												CMGGAAGY	c-Ets-1 68	c-Ets-1 68(c)
V$ELF1_Q6 (M00746)						4	4.72																												RNWMBAGGAART	Elf-1	Elf-1(m); Elf-1(r); ELF-1(h)
V$TEF_Q6 (M00672)							4.72																												ATGTTWAYATAA	TEF	TEF-xbb1(h); TEF(r)
V$NKX25_02 (M00241)							4.61																4.38												CWTAATTG	Nkx2-5	CSX(m)
V$AREB6_02 (M00413)							4.26																												WNWCACCTGWNN	AREB6	ZEB (1124 AA)(h)
V$ATF_01 (M00017)							4.02										5.01																7.01		CNSTGACGTNNNYC	ATF	ATF(h)
V$CDPCR3HD_01 (M00106)							3.84																												NATYGATSSS	CDP CR3+HD	CDP(h); CDP-isoform1(h)
V$TGIF_01 (M00418)							3.73																												AGCTGTCANNA	TGIF	TGIF(h); TGIF-isoform2(h); TGIF(m)
V$NFKB_Q6 (M00194)							3.6																												NGGGGAMTTTCCNN	NF-kappaB	NF-kappaB(r); NF-kappaB(m); NF-kappaB(h); p50(m); p50(r); p50(h)
V$XFD1_01 (M00267)							3.6																												YAWGTAAATAWWRY	XFD-1	FOXA4a(x)
V$GATA3_03 (M00351)							3.48														4.31														ANAGATMWWA	GATA-3	GATA-3(c)
V$OCT1_06 (M00162)							3.48																												CWNAWTKWSATRYN	OCT1	POU2F1(h); Oct-1(r); POU2F1(mo); POU2F1(GIB); POU2F1(ha); POU2F1(c); POU2F1(x); POU2F1a(m)
V$AR_Q2 (M00447)								1	6.17																										AGWACATNWTGTTCT	AR	AR(r); AR(ph); AR(pt); AR(mf); AR(EULFC); AR(h); AR(m)
V$TEL2_Q6 (M00678)									5.69												4.43		4.72												YTACTTCCTG	Tel-2	Tel-2a(h); Tel-2c(h); Tel-2b(h)
V$SP3_Q3 (M00665)								3	5.56				3.66	1	3.84												3.84				4.02		3.66		ASMCTTGGGSRGGG	Sp3	Sp3(h); Sp3-isoform1(h); Sp3(c); Sp3(r)
V$E2_01 (M00107)								2	5.18								3.66																5.36		NNACCRNNANCGGTRN	E2	E2(BPV1)
V$E2_Q6_01 (M00928)									5.13								4.84																6.42		TNTACCGKKWYCGGTK	E2	E2(BPV1)
V$ICSBP_Q6 (M00699)									4.49																										RAARTGAAACTG	ICSBP	IRF-8(h); IRF-8(c); IRF-8(m)
V$NMYC_01 (M00055)									4.38		3.89		3.73						4.38						3.79		4.43								NNCCACGTGNNN	N-Myc	N-Myc(m)
V$SMAD4_Q6 (M00733)									4.31											4	4.31						4.84						3.73		GKSRKKCAGMCANCY	SMAD4	Smad4(pg); Smad4(h); Smad4(r); Smad4(z); Smad4(m)
V$KROX_Q6 (M00982)								2	3.84								4.72	7	5.9													5	8.5		CCCGCCCCCRCCCC	KROX	Egr-1(h); Egr-3(h); Egr-4(h); Egr-2(h); Egr-3(m); Egr-1(mo); Egr-2(m); Egr-1(m); Egr-4(r); Egr-1(r)
V$AMEF2_Q6 (M00403)									3.84																										CKGDYTAAAAATAACYMM	aMEF-2	aMEF-2(h)
V$PAX9_B (M00329)									3.73																										RWKACSCANNGNKGMGTGRCSACC	Pax-9	Pax-9a(z); Pax-9b(z)
V$CREBP1_01 (M00040)									3.6																										TTACGTAA	ATF2	ATF-2-xbb4(h)
V$MYC_Q2 (M00799)									3.54		3.79								3.66																CACGTGS	Myc	Max-isoform2(h); c-Myc(h); c-Myc(m); Max(m); c-Myc(r)
V$HTF_01 (M00538)										3	11.01																								NNWWWWNGMCACGTCATYNYWNNN	HTF	XBP-1(r)
V$IRF7_01 (M00453)										3	6.61																								TNSGAAWNCGAAANTNNN	IRF-7	IRF-7A(h)
V$IRF_Q6 (M00772)										2	6.34										4.02														BNCRSTTTCANTTYY	IRF	IRF-3(h); IRF-7H(h); IRF-7A(h); IRF-4(h); IRF-5(h); IRF-5(m); IRF-6(x); IRF-6(h); IRF-6(m); IRF-3(c); IRF-3(m); IRF-7(m); IRF-10(c); IRF-8(h); IRF-8(c); IRF-2(c); IRF-1(c); IRF-4(m); IRF-1(m); IRF-1(r); IRF-1(h); IRF-8(m); IRF-2(h); IRF-2(m)
V$AHRARNT_01 (M00235)											5.46									4	8.62														KNNKNNTYGCGTGCMS	AhR:Arnt	Arnt(h); AhR(h); Arnt(m); Arnt-L(m); Arnt(r); AhR(m); AhR(r); AhR(gp)
V$CACCCBINDINGFACTOR_Q6 (M00721)											5.13																								CANCCNNWGGGTGDGG	CACCC-binding factor	CACCC-binding factor(h)
V$USF_Q6 (M00187)										3	4.84								3.66																GYCACGTGNC	USF	USF1(m); USF1(r):USF2(r); USF1(h); USF(HA); USF(c); USF(DUCK); USF1(r); USF2(r); USF2a(r)
V$ATF4_Q2 (M00514)											4.38																								CVTGACGYMABG	ATF4	ATF-4(h); ATF4(m); ATF4 (381AA)(m)
V$VMYB_02 (M00227)										2	4.02																								NSYAACGGH	v-Myb	v-Myb(AMV)
V$ER_Q6 (M00191)											3.48																				5.18				NNARGNCANNNTGACCYNN	ER	ER-alpha(h); ER-alpha-L(h); ER-alpha(c); ER-alpha(m); ER-alpha(r)
V$XBP1_01 (M00251)											3.48																								NNGNTGACGTGKNNNWT	XBP-1	XBP-1(h)
V$ISRE_01 (M00258)													6.57																						CAGTTTCWCTTTYCC	ISGF-3	ISGF-3(h)
V$FOX_Q2 (M00809)												7	5.94																		3.66				KATTGTTTRTTTW	FOX factors	FOXH1(m); FOXJ1a(h); FOXJ1b(h); FOXF2(h); FOXD3(h); FOXD3(m); FOXF1(h); FOXD3(r); FOXJ1(m); FOXJ1(r); FOXF1(m); FOXF2(m)
V$HP1SITEFACTOR_Q6 (M00725)													4.67						5.4				4.02												AATWTTCAACAG	HP1 site factor	HP1 site factor(r)
V$DEAF1_02 (M01002)													4.61																						RNNNRTTCGGGNRTTTCCGGRRNKN	DEAF1	DEAF-1(pt)
V$HNF4ALPHA_Q6 (M00638)												7	4.56								3.84														VTGAACTTTGMMB	HNF4alpha	HNF-4alpha(h); HNF-4(h); HNF-4alpha1(h); HNF-4(r); HNF-4alpha(r); HNF-4alpha2(r); HNF-4alpha1(r); HNF-4(CHIPMUNK); HNF-4alpha1(x); HNF-4alpha(m); HNF-4alpha1(m); HNF-4alpha2(m)
V$LMO2COM_02 (M00278)													4.08																						NMGATANSG	Lmo2 complex	RBTN2-isoform1(h); RBTN2(m)
V$VMYB_01 (M00003)												6	4.02			6	4.72							6	4.14										AATAACGGNA	v-Myb	v-Myb(AMV)
V$GCM_Q2 (M00634)													4.02																						CNNRCCCGCATD	GCM	GCMa(h); GCMa(m); GCMb(m)
V$OCT1_Q6 (M00195)													3.84					4	5.79				3.79												NNNNATGCAAATNAN	OCT1	POU2F1(h); Oct-1(r); POU2F1(mo); POU2F1(GIB); POU2F1(ha); POU2F1(c); POU2F1(x); POU2F1a(m)
V$NRF2_Q4 (M00821)													3.79																				4.2		NTGCTGAGTCAKN	Nrf-2	Nrf2(m):MafK(m); Nrf2(r):MafK(r); Nrf2(m); Nrf2(h); Nrf2-isoform1(h); Nrf2(r)
V$BACH2_01 (M00490)												4	3.79																						SRTGAGTCANC	Bach2	Bach2(h); Bach2(m)
V$GATA1_03 (M00127)													3.66								4.26		3.48										4.14		RNSNDGATTANNGN	GATA-1	GATA-1(h); GATA-1 isoform 1(h); GATA-1A(x); GATA-1(c); GATA-1(m)
V$COUP_01 (M00158)													3.6																						TGAMCTTTGMMCYT	COUP-TF, HNF-4	HNF-4alpha2(h); COUP-TF1(h); HNF-4alpha1(r); COUP(r); COUP-TF1(c); COUP-TF1(m)
V$GATA2_02 (M00348)													3.54																						NNWGATAASA	GATA-2	GATA-2(c)
V$GATA_C (M00203)													3.48						4.08								5.01								NGATAAGNMNN	GATA-X	GATA-1(h); GATA-1 isoform 1(h); GATA-3 isoform-1(h); GATA-3(c); GATA-2(c); GATA-2(h); GATA-3(m); GATA-3(fc); GATA-1A(x); GATA-2(x); GATA-3(x); GATA-2(m); GATA-1(c); GATA-1(m)
V$ZID_01 (M00085)															5.08																				NGGCTCYATCAYC	ZID	ZID(h)
V$STAT5A_02 (M00460)															4.56								4.78												TTCCNRGAANNNNNNTTCCNNGRR	STAT5A (homotetramer)	STAT5A(h); STAT5A(s); STAT5A(m)
V$PEBP_Q6 (M00984)															3.95								5.4												GNTNACCACARANNK	PEBP	PEBP2alpha(m); AML1(h); AML1b(h); AML1c(h); AML1a(h); AML2(h); PEBP2beta(h); AML3(h); AML3-isoform2(h); AML3-isoform1(h); PEBP2alphaB1(m); PEBP2alphaB2(m); PEBP2alphaA1(m); PEBP2alphaA2(m); RUNX2-isoform2(m); RUNX3(m); AML1(r); AML3(r); Runx3(r); AML1(GIB); PEBP2beta(GIB); PEBP2alpha(h); PEBP2beta(m); PEBP2beta3(m); PEBP2beta1(m); PEBP2beta2(m)
V$AP1_Q2 (M00173)														1	3.89																				RSTGACTNANW	AP-1	AP-1(h); AP-1(XEN); AP-1(mo); AP-1(r); AP-1(m); AP-1(HA); AP-1(c); AP-1(GIB)
V$VMAF_01 (M00035)															3.79				3.54											7	5.18				NNNTGCTGACTCAGCANNN	v-Maf	v-Maf(AS42)
V$TITF1_Q3 (M00432)															3.48																				ASTCAAGTRK	TTF1 (Nkx2-1)	Nkx2-1(m); Nkx2-1(c); Nkx2-1(b); Nkx2-1(ca); Nkx2-1(r); Nkx2-1(h); Nkx2-1-isoform1(h)
V$CDC5_01 (M00478)																7	8.5																		GATTTAACATAA	Cdc5	CDC5L(h)
V$E2F1_Q4_01 (M00939)																	6.94																		TTTSGCGSG	E2F-1	E2F-3a(h); E2F-4(h); E2F(m); E2F(r); E2F(h):DP(h); E2F(h):DP(h):E4(AD5); DP-1(h); E2F-1(m); E2F-1(h)
V$DEC_Q1 (M00997)																7	6.65															4	4.26		SCCCAMGTGAAGN	DEC	Stra13(m); DEC1(h); DEC2(h); DEC2(m); DEC1(r); DEC2(r)
V$CREB_Q4 (M00178)																	6.57																5.56		NSTGACGTMANN	CREB	CREB1(b); CREB(h); CREB(HA); CREB(mv); CREB1(r); CREB(m)
V$E2F_Q4_01 (M00919)																	6.34																		NCSCGCSAAAN	E2F	E2F-3a(h); E2F-4(h); E2F(m); E2F(r); E2F(h):DP(h); E2F(h):DP(h):E4(AD5); DP-1(h); E2F-1(m); E2F-1(h)
V$AHR_Q5 (M00778)																	6.24																		NTNGCGTGNNN	AhR	AhR(h); AhR(m); AhR(r); AhR(gp); AhR(rb)
V$AREB6_01 (M00412)																2	5.18							2	4.26										NNYNYACCTGWVT	AREB6	ZEB (1124 AA)(h)
V$AREB6_03 (M00414)																4	5.01																		VNRCACCTGKNC	AREB6	ZEB (1124 AA)(h)
V$SRF_Q6 (M00186)																	4.96		3.6																GNCCAWATAWGGMN	SRF	SRF-L(m); SRF(h); SRF(r); SRF(fc); SRF(c)
V$E47_02 (M00071)																	4.38										4.14								NNNMRCAGGTGTTMNN	E47	E47(h)
V$ATF_B (M00338)																	4.26																		NTGACGTCANYS	ATF	ATF(h)
V$CREB_01 (M00039)																	4.2																5.63		TGACGTMA	CREB	deltaCREB(h); CREB(h); deltaCREB(r); CREB1(r); deltaCREB(m); CREB(m)
V$CREB_02 (M00113)																	4.14																4.78		NNGNTGACGTNN	CREB	deltaCREB(h); CREB(h); deltaCREB(r); CREB1(r); deltaCREB(m); CREB(m)
V$PAX3_B (M00327)																	4.08																		NNNNNNCGTCACGSTYNNNNN	Pax-3	Pax-3(h); Pax-3(m)
V$CREBP1CJUN_01 (M00041)																	3.79																		TGACGTYA	ATF2:c-Jun	c-Jun(c); c-Jun(h); c-Jun(r); ATF-2-xbb4(h); c-Jun(m)
V$MYOD_01 (M00001)																	3.73						4.08			6	4.84								SRACAGGTGKYG	MyoD	MyoD(m)
V$CEBPGAMMA_Q6 (M00622)																	3.73																		CTBATTTCARAAW	C/EBPgamma	C/EBPgamma(h); C/EBPgamma(m); C/EBPgamma(r)
V$HNF1_Q6 (M00790)																	3.66																		WRGTTAATNATTAACNNN	HNF1	HNF-1alpha-B(h); HNF-1alpha-C(h); HNF-1alpha-A(h); HNF-1beta-C(h); HNF-1beta-B(h); HNF-1beta-A(h); HNF-1alpha(pg); HNF-1alpha(c); HNF-1beta(pg); HNF-1alpha(m); HNF-1beta(m); HNF-1beta(r); HNF-1alpha(r)
V$TAL1_Q6 (M00993)																	3.48		3.89											6	4.96		3.84		TCCAKCTGNY	TAL1	Tal-1(c); Tal1-PP42(h); Tal-1(m)
V$HNF3B_01 (M00131)																		3	7.28													6	7.18		KGNANTRTTTRYTTW	HNF3beta	HNF-3beta(r)
V$BARBIE_01 (M00238)																		4	6		3.6														ATNNAAAGCNGGNGG	Barbie Box
V$EBF_Q6 (M00977)																		6	5.74							4	6								KTCCCYWGRGA	EBF	COE3(m); COE2(m); EBF1-L(m); Olf-1(r)
V$MRF2_01 (M00454)																			5.63								4.02								AWSCACAATACNVA	MRF-2	MRF-2-isoform1(h)
V$CHOP_01 (M00249)																			5.08						3.48										NNRTGCAATMCCC	CHOP:C/EBPalpha	C/EBPalpha(c); C/EBP(x); CHOP-10(m); CHOP-10(h); C/EBPalpha(m); CHOP-10(lh); C/EBPalpha(r); C/EBPalpha(h)
V$USF_01 (M00121)																			5.08								4.43								NNRYCACGTGRYNN	USF	USF1(m); USF1(h); USF(HA); USF(c); USF(DUCK); USF1(r)
V$FOXD3_01 (M00130)																			4.43	6	4.49														NAWTGTTTRTTT	FOXD3	FOXD3(h); FOXD3(m); FOXD3(r)
V$STAT_01 (M00223)																			4.31																TTCCCGKAA	STATx	STAT5A(s); STAT2(h); STAT3(h); STAT1beta(h); STAT1alpha(h); STAT4(h); STAT6(m); STAT3(m); STAT1alpha(m); STAT4(m); STAT5A(m); STAT5B(m); STAT6(h)
V$EVI1_04 (M00081)																		4	4.14																DGATADGAHWAGATA	Evi-1	Evi-1(m)
V$PIT1_Q6 (M00802)																			3.95				3.79												NMTTCATAAWTATWNMNA	Pit-1	Pit-1B(h); Pit-1(m); Pit-1B(r); Pit-1A(r); Pit-1-xbb3(r)
V$OLF1_01 (M00261)																			3.95						3.79		5.9								NNCDABTCCCYAGRGARBNKGN	Olf-1	Olf-1(r)
V$TCF1P_Q6 (M00670)																			3.79											7	5.69				GKCRGKTT	TCF-1(p)
V$GATA2_03 (M00349)																			3.73																ASAGATAANA	GATA-2	GATA-2(c)
V$VMW65_Q6 (M00708)																			3.66																	Vmw65
V$FOXO1_02 (M00474)																				4	6.89														GNNTTGTTTACNTT	FOXO1	FOXO1(m); FOXO1(h)
V$SREBP_Q3 (M00776)																					5.56														VNNVTCACCCYA	SREBP	SREBP-2(h); SREBP-1(m); SREBP-1a(h); SREBP-1b(h); SREBP-1c(h); SREBP-1(ha); SREBP-2(ha); SREBP-2(c); SREBP-1(rb); SREBP-1(pg); SREBP-2(rb); SREBP-2(pg); SREBP-1(c); SREBP-1c(r)
V$CREL_01 (M00053)																				7	5.3									6	4.02				SGGRNTTTCC	c-Rel	c-Rel(h); c-Rel(c); c-Rel(m)
V$FREAC2_01 (M00290)																					4.84														NNANNGTAAACAANNN	Freac-2	FOXF2(h)
V$PAX5_01 (M00143)																					4.43														BCNNNRNGCANBGNTGNRTAGCSGCHNB	Pax-5	Pax-5(h); Pax-5(m)
V$SREBP1_Q6 (M00749)																				4	4.43														CACSCCA	SREBP-1	SREBP-1(ha); SREBP-1c(r)
V$HNF4_DR1_Q3 (M00764)																					4.26														TGAMCTTTGNCCN	HNF4 direct repeat 1	HNF-4alpha(h); HNF-4(h); HNF-4alpha4(h); HNF-4alpha3(h); HNF-4alpha1(h); HNF-4alpha7(h); HNF-4alpha2(h); HNF-4(r); HNF-4gamma(h); HNF-4alpha(r); HNF-4alpha2(r); HNF-4alpha1(r); HNF-4(CHIPMUNK); HNF-4alpha(m); HNF-4alpha1(m); HNF-4alpha7(m); HNF-4alpha2(m)
V$IPF1_Q4 (M00436)																					4.26														GHNNTAATGACM	IPF1	IPF1(h); IPF1(m); IPF1(r); IPF1(gl); IPF1(x)
V$MYOGNF1_01 (M00056)																					4.14						4.9				4.49				CRSCTGTBBNNTTTGGCACBSNGCCARCH	myogenin / NF-1	NF-1(h); NF-1A1(c); NF-1(r); NF-1/L(r); NF-1B2(c); NF-1C2(c); NF-1B1(c); NF-1(fc); NF-1(mo); NF-1(XEN); NF-1(m); NF-1(HA); NF-1(s); NF-1(pg); NF-1/Red1(HA); NF-1X(HA)
V$PPARG_03 (M00528)																					4.02														WASNRGGNCAAAGGTCA	PPAR	PPARgamma(x); PPARgamma2(b); PPARgamma1(b); PPARgamma1(h); PPARgamma2(h); PPARgamma1(m)
V$CAAT_01 (M00254)																					3.95														NNNRRCCAATSA	CCAAT box
V$ATF1_Q6 (M00691)																					3.84												3.79		CYYTGACGTCA	ATF1	ATF-1(h); ATF-1(m)
V$LDSPOLYA_B (M00317)																					3.79						6.89								NNNSTGTGTDYYCWTN	Poly A
V$NERF_Q2 (M00531)																							7.18												YRNCAGGAAGYRNSTBDS	NERF1a	NERF-1a(h)
V$ETS2_B (M00340)																							7.05												KRCAGGAARTRNKT	c-Ets-2	c-Ets-2(m); c-Ets-2(h); c-Ets-1 54(c)
V$ETS1_B (M00339)																							5.4												RCAGGAAGTGNNTNS	c-Ets-1	c-Ets-1(m); Ets-1(h); c-Ets-1(h)
V$HAND1E47_01 (M00222)																							5.3	7	5.18										NNNNGNRTCTGGMWTT	Hand1:E47	E47(h); Hand1(m)
V$LEF1_Q6 (M00745)																							4.31												SWWCAAAGGG	LEF1	LEF-1(z); LEF-1(x); LEF-1(h); LEF-1(r); LEF-1(m); LEF-1(c)
V$HNF1_01 (M00132)																							4.26												GGTTAATNWTTAMCN	HNF1	HNF-1alpha-A(h); HNF-1alpha(m); HNF-1alpha(r)
V$AML_Q6 (M00769)																							4.14												NNGKNTGTGGTTWNC	AML	AML1(h); AML1b(h); AML1c(h); AML1a(h); AML2(h); AML3(h); AML3-isoform2(h); AML3-isoform1(h); PEBP2alphaB1(m); PEBP2alphaB2(m); PEBP2alphaA1(m); PEBP2alphaA2(m); RUNX2-isoform2(m); AML1(r); AML3(r); AML1(GIB); PEBP2beta(m)
V$SRF_Q5_01 (M00922)																							4.14												CCAWATAWGGMNMNG	SRF	SRF(m); SRF-I(m); SRF-L(m); SRF-M(m); SRF-S(m); SRF(h); SRF(r)
V$CMYB_01 (M00004)																							3.79												NCNRNNGRCNGTTGGKGG	c-Myb	c-Myb(m)
V$HIF1_Q5 (M00466)																							3.48												NGTACGTGCNGB	HIF1	HIF-1(h); HIF-1(m); HIF-1(b); HIF-1(r); HIF-1alpha(h); HIF-1alpha-isoform1(h)
V$MEIS1BHOXA9_02 (M00421)																									5.24										TGACASTTTWAYRR	MEIS1B:HOXA9	HOXA9(c); HOXA9(CAV); HOXA9a(z); HOXA9b(z); HOXA9(fr); Meis-1(h); HOXA9B(h); Meis-1b(m); HoxA-9(m)
V$OCT1_02 (M00136)																								2	4.72		4.78								NNGAATATKCANNNN	OCT1	POU2F1(h); Oct-1(r); POU2F1(mo); POU2F1(GIB); POU2F1(ha); POU2F1(c); POU2F1(x); POU2F1a(m)
V$XFD3_01 (M00269)																									4.56										TNWGTAAACAAWMW	XFD-3	HNF-3beta(x)
V$VBP_01 (M00228)																									4.02		3.54								GTTACRTMAT	VBP	VBP(c)
V$POU1F1_Q6 (M00744)																								4	4.02										ATGAATAAWT	POU1F1	Pit-1B(h); Pit-1(m); Pit-1B(r); Pit-1A(r)
V$RORA1_01 (M00156)																									3.95										NWAWNNAGGTCAN	RORalpha1	RORalpha1(h)
V$E2F_Q6_01 (M00920)																								4	3.89										NKCGCGCSAAAN	E2F	E2F-3a(h); E2F-4(h); E2F(m); E2F(r); E2F(h):DP(h); E2F(h):DP(h):E4(AD5); E2F-1(h):DP-1(h); DP-1(h); E2F-7(h); E2F-7(m); E2F-1(m); E2F-1(h)
V$RFX1_02 (M00281)																									3.84		3.79								NNGTNRCNATRGYAACNN	RFX1	RFX1(h); RFX1(m)
V$CLOX_01 (M00103)																									3.79										NNTATCGATTANYNW	Clox	Cutl(ca)
V$COMP1_01 (M00057)																								4	3.66										NVTNWTGATTGACNACAAVARRBN	COMP1	COMP1(m)
V$FOXO3_01 (M00477)																									3.6										TNNTTGTTTACNTW	FOXO3	FOXO3a(m); FOXO3a(h)
V$NKX25_01 (M00240)																									3.48										TYAAGTG	Nkx2-5	CSX(m)
V$MAZR_01 (M00491)																										7	7.68				4.67		6.72		NSGGGGGGGGMCN	MAZR	MAZR(m); PATZ(h)
V$FOXJ2_02 (M00423)																											7.23								AYMATAATATTTKN	FOXJ2	FOXJ2(m); FOXJ2 (long isoform)(h)
V$MTATA_B (M00320)																										4	7.13	1	6.61						CBNTATAAANCNCNVSS	Muscle TATA box
V$NFKAPPAB_01 (M00054)																											5.24								GGGAMTTYCC	NF-kappaB	NF-kappaB(r); NF-kappaB(m); NF-kappaB(h); RelA-p65(h); p50(h)
V$FOXJ2_01 (M00422)																										4	4.72								NNNWAAAYAAAYANNNNN	FOXJ2	FOXJ2(m); FOXJ2 (long isoform)(h)
V$NFY_01 (M00287)																											4.08								NNNRRCCAATSRGNNN	NF-Y	CBF(2)(r); NF-Y(h); NF-Y(m)
V$CEBP_C (M00201)																											3.84								NGWVTKNKGYAAKNSAYA	C/EBP	C/EBPalpha(m); C/EBPalpha(r); C/EBPalpha(h)
V$NFY_Q6 (M00185)																											3.66				3.84				TRRCCAATSRN	NF-Y	CBF(2)(r); NF-Y(h); NF-Y(m); CP1(lh); NF-YA(h); NF-YA-L(h); NF-YB(h); NF-YC-3(h); NF-YA isoform-1(m); NF-YB(m); NF-YC(m); NF-YA(r); CBF-B(r); NF-YB(r); CBF-A(r); CBF-C(r)
V$PAX6_01 (M00097)																											3.6								NNNNTTCACGCWTGANTKNNN	Pax-6	Pax-6(h); Pax-6(m); Pax6-1(m)
V$FREAC7_01 (M00293)																											3.48								WNNANATAAAYANNNN	Freac-7	FOXL1(h)
V$AIRE_02 (M01000)																													4.43						GGTTATTAATTGGTTATATTGGTTD	AIRE	AIRE(h); AIRE-isoform1(h)
V$CART1_01 (M00416)																															4.49				NNNTAATTNNCATTANCN	Cart-1	Cart-1(h); Cart-1(r); Cart-1(x); Cart-1(m)
V$ATF3_Q6 (M00513)																															3.73				CBCTGACGTCANCS	ATF3	ATF3(h); ATF3(m); ATF3(r)
V$SRF_01 (M00152)																																	9.04		ATGCCCATATATGGWNNT	SRF	SRF-L(m); SRF(h); SRF(r); SRF(fc); SRF(c)
V$PITX2_Q2 (M00482)																																	6.24		WNTAATCCCAR	Pitx2	PITX2(h); PITX2A(h); Pitx2(m)
V$DEAF1_01 (M01001)																																	5.94		NCGNNYTCGGGNRTTTCCGDARNNN	DEAF1	DEAF-1(pt)
V$NFKB_C (M00208)																																	5.74		NGGGACTTTCCA	NF-kappaB	NF-kappaB(r); NF-kappaB(m); NF-kappaB(h); NF-kappaB2-p52(h); p50(h)
V$ZTA_Q2 (M00711)																																7	5.74		TNACNNTKRCWCA	Zta	Zta(EBV)
V$NFKAPPAB65_01 (M00052)																																	5.63		GGGRATTTCC	NF-kappaB (p65)	RelA-p65(h); RelA-p65(m)
V$MAZ_Q6 (M00649)																																6	4.72		GGGGAGGG	MAZ	MAZ(m); MAZ(h); MAZ(gl)
V$LEF1TCF1_Q4 (M00978)																																	4.61		MCTTTGWWSNY	LEF1, TCF1	TCF-1(h); TCF-1A(h); TCF-1B(h); TCF-1C(h); TCF-1G(h); TCF-1E(h); TCF-1F(h); LEF-1(z); LEF-1(x); TCF-1(P)(m); TCF-1B(m); LEF-1(h); LEF-1(r); LEF-1(m); LEF-1S(m); LEF-1(c)
V$E2_Q6 (M00181)																																	4.49		NNACCRNNANCGGTRN	E2	E2(BPV1)
V$NFKB_Q6_01 (M00774)																																	4.26		NNNNKGGRAANTCCCN	NF-kappaB	NF-kappaB(r); NF-kappaB(m); NF-kappaB(h); NF-kappaB(rb); p100(c); RelA-p65(h); NF-kappaB2-p52(h); NF-kappaB(-like)(h); NF-kappaB(-like)(m); NF-TNF(m); NF-TNF(r); p105(m); p50(m); NF-kappaB2 (p49)(h); NF-kappaB2-p100(h); RelA-p65(m); p50(r); p105(r); RelA-p65(r); p50(h); NF-kappaB1(h)
V$AP1_Q4 (M00188)																																	3.84		RGTGACTMANN	AP-1	AP-1(h); AP-1(XEN); AP-1(mo); AP-1(r); AP-1(m); AP-1(HA); AP-1(c); AP-1(GIB)
V$SRF_Q4 (M00810)																																	3.48		SCCAWATAWGGMNMNNNN	SRF	SRF(m); SRF-I(m); SRF-L(m); SRF-M(m); SRF-S(m); SRF(h); SRF(r)
