# Supplementary material for: A Transcription Factor Map as Revealed by a Genome-Wide Gene Expression Analysis of Whole-Blood mRNA Transcriptome in Multiple Sclerosis
Source: PLoS One. 2010 Dec 1;5(12):e14176. doi: 10.1371/journal.pone.0014176 (PMC2995726; doi:10.1371/journal.pone.0014176)
Supplement: Table S7 — Members of high cardinality stars. Complete member listing of all 39 high cardinality stars. (0.29 MB XLS) [file pone.0014176.s007.xls]

## Sheet: Stars
C-MS2 stars with degree >= 20
Star Centres						ABK signatures
#	Symbol	Probe ID	# in star	Mean distance	Cluster	sig	C-MS	C-P	C-R	C-S	P-S	R-P	R-S	Gather	gProfile	RefSeq
1	LOC651316	ILMN_1681092	73	0.277113	final_1									KIAA1143		nm_001184 nm_006322 nm_173464
2	LOC648716	ILMN_1653724	62	0.267993	final_2									XM_944654		XM_944654 xm_935966 xm_935369
3	IRAK3	ILMN_1661695	62	0.268393	final_63									11213	ENSG00000090376	NM_007199
4	WHSC1L1	ILMN_1697919	62	0.269495	final_2									54904	ENSG00000147548	NM_017778
5	HS.495215	ILMN_1820392	56	0.275665	final_1									28644	ENSG00000211816	trav38-1
6	ANKRD36B	ILMN_2189614	44	0.264559	final_10									57730	ENSG00000174501	NM_025190
7	HS.413494	ILMN_1880406	42	0.269662	final_2									5728	ENSG00000050767	col23a1
8	HS.540667	ILMN_1844998	35	0.269398	final_25									4872		nm_022482 nm_021235
9	C20ORF134	ILMN_1733531	34	0.27051	final_1	o		2						170487	ENSG00000182584	NM_001024675
10	PTPRN	ILMN_1658576	33	0.251912	final_53	o			-2					5798	ENSG00000054356	NM_002846
11	LOC387870	ILMN_1687928	33	0.262444	final_2									387870		NM_032109 XM_001719040 XM_001124828 NM_001145026
12	HS.574542	ILMN_1826557	33	0.263241	final_1									NM_001007027		NM_001007027 NM_024079 NM_001869
13	SPCS1	ILMN_1665280	33	0.272633	final_1									28972	ENSG00000114902	NM_014041
14	RP1L1	ILMN_1742054	32	0.259779	final_40									94137	ENSG00000183638	NM_178857
15	JMJD3	ILMN_2397521	30	0.258549	final_19									23135	ENSG00000132510	NM_001080424
16	LOC643121	ILMN_1804772	29	0.258786	final_1									NM_033107		NM_033107 NM_001042717 XM_209554
17	ASPM	ILMN_1815184	29	0.260679	final_12									259266	ENSG00000066279	NM_018136
18	KRTAP19-6	ILMN_1784216	27	0.264161	final_1									337973	ENSG00000186964	NM_181612
19	KIAA0323	ILMN_1654392	26	0.248215	final_6									23351	ENSG00000100441	NM_015299
20	HS.571125	ILMN_1895313	26	0.273205	final_1									441133		NM_001100595 NM_182620 NM_024919
21	HS.443993	ILMN_1899762	25	0.259306	final_1	o					2			4064		NT_006713
22	HS.541221	ILMN_1850545	24	0.247589	final_47									NM_014877		NM_014877 NM_178140
23	HS.119225	ILMN_1855976	24	0.257361	final_19									NM_138809		XM_001127649 XM_001723898 XM_001719617 NM_138809 NM_015113 NM_012414
24	HS.551825	ILMN_1898116	24	0.264445	final_1									NM_014000		NM_014000 NM_003373 NM_020798 NM_197968 NM_003453 NM_181265 NM_170710
25	FAM91A1	ILMN_1777322	24	0.26604	final_2									157769	ENSG00000176853	NT_008046
26	MAPK3	ILMN_1667260	23	0.258462	final_6									5595	ENSG00000102882	NM_002746
27	SHROOM4	ILMN_2206188	23	0.259708	final_106									57477	ENSG00000158352	NM_020717
28	LOC648814	ILMN_1658044	23	0.261239	final_6									NM_000115		NM_000115
29	POM121	ILMN_2145050	23	0.273678	final_18									9883	ENSG00000196313	NM_172020
30	HNRPR	ILMN_2175894	23	0.27815	final_1									10236	ENSG00000125944	NM_005826
31	MAP2K6	ILMN_1697729	22	0.24934	final_6									5608	ENSG00000108984	NM_002758
32	HS.170953	ILMN_1829898	22	0.261138	final_0									NM_020163		NM_020163 NM_019898 NM_019899 NM_019862 NM_004996 NM_019900 NM_201599 NM_005096
33	RAB13	ILMN_1788180	22	0.262669	final_12									5872	ENSG00000143545	NM_002870
34	CMTM4	ILMN_1815319	22	0.276538	final_6									146223	ENSG00000183723	NM_178818
35	DAAM1	ILMN_1787251	21	0.26207	final_2									23002	ENSG00000100592	NM_014992
36	MLKL	ILMN_1737498	21	0.273764	final_1									197259	ENSG00000168404	NM_152649
37	KCNMA1	ILMN_1794282	20	0.258519	final_1									3778	ENSG00000156113	NM_001014797
38	INSR	ILMN_1670918	20	0.262693	final_26									3643	ENSG00000171105	NM_000208
39	DPAGT1	ILMN_1692760	20	0.265167	final_1									1798	ENSG00000172269	NM_001382
Nodes Connecting Stars:					Cluster	sig	C-MS	C-P	C-R	C-S	P-S	R-P	R-S		gProfile
	CD86	ILMN_1782560	2		final_1										NM_175862
	CMTM4	ILMN_1815319	2	star centre	final_6										NM_178818
	GSTO1	ILMN_1808196	2		final_1										NM_004832
	MDH1	ILMN_1656913	2		final_1										NM_005917
	PLA2G4B	ILMN_1697629	2		final_1										NM_005090
	IBTK	ILMN_1675669	2		final_2										NM_015525
	LOC90586	ILMN_1661052	2		final_6										XR_000544
	OCIAD2	ILMN_1772286	2		final_1										NM_152398
	LOC648814	ILMN_1658044	2	star centre	final_6										XM_943472
	USP5	ILMN_1671494	2		final_1										NM_003481
Star Members (1-Nearest Neighbours)
Group	Symb	Probe	# in star	Notes	InCluster	sig	C-MS	C-P	C-R	C-S	P-S	R-P	R-S	Gather	gProfile	RefSeq	Sign.Correl	Seq
LOC651316	ZNF831	ILMN_1658016	73		final_1									128611	EG:128611	XM_940057	1
LOC651316	PAN2	ILMN_1658373	73		final_1									9924	EG:9924	NM_014871	1
LOC651316	POPDC2	ILMN_1660282	73		final_1									64091	EG:64091	NM_022135	1
LOC651316	MCOLN2	ILMN_1660462	73		final_1									255231	EG:255231	NM_153259	1
LOC651316	CLCF1	ILMN_1661197	73		final_1									23529	EG:23529	NM_013246	1
LOC651316	RUNX1	ILMN_1669335	73		final_1									861	EG:861	NM_001001890	1
LOC651316	WDR6	ILMN_1669484	73		final_1									11180	EG:11180	NM_018031	1
LOC651316	USP5	ILMN_1671494	73	connects 2 stars	final_1									8078	EG:8078	NM_003481	-1
LOC651316	ECHDC2	ILMN_1671568	73		final_1									55268	EG:55268	NM_018281	1
LOC651316	PIGO	ILMN_1673395	73		final_1									84720	EG:84720	NM_032634	1
LOC651316	MFSD10	ILMN_1674874	73		final_1									10227	EG:10227	NM_001120	1
LOC651316	SOX13	ILMN_1683755	73		final_1									9580	EG:9580	NM_005686	1
LOC651316	IL2RB	ILMN_1684349	73		final_1									3560	EG:3560	NM_000878	1
LOC651316	PVRIG	ILMN_1688279	73		final_1									NM_024070	EG:79037	NM_024070	1
LOC651316	LOC400963	ILMN_1688749	73		final_1									XM_942473.1	EG:650901	XM_942473	1
LOC651316	JMJD4	ILMN_1692896	73		final_1									65094	EG:65094	NM_023007	1
LOC651316	MAPRE2	ILMN_1695276	73		final_1									10982	EG:10982	NM_014268	1
LOC651316	SPG7	ILMN_1697096	73		final_1									6687	EG:6687	NM_199367	1
LOC651316	PLA2G4B	ILMN_1697629	73	connects 2 stars	final_1									8681	EG:8681	NM_005090	1
LOC651316	PCSK7	ILMN_1699545	73		final_1									9159	EG:9159	NM_004716	1
LOC651316	AARSD1	ILMN_1700461	73		final_1									80755	EG:80755	NM_025267	1
LOC651316	SRP68	ILMN_1703524	73		final_1									6730	EG:6730	NM_014230	1
LOC651316	NAT10	ILMN_1705594	73		final_1									55226	EG:55226	NM_024662	1
LOC651316	CKAP5	ILMN_1716336	73		final_1									9793	EG:9793	NM_001008938	1
LOC651316	MLLT6	ILMN_1718734	73		final_1									4302	EG:4302	NM_005937	1
LOC651316	LOC23117	ILMN_1725881	73		final_1									23117	EG:23117	XM_933824	1
LOC651316	IKBKB	ILMN_1727142	73		final_1									3551	EG:3551	NM_001556	1
LOC651316	EVL	ILMN_1730622	73		final_1									51466	EG:51466	NM_016337	1
LOC651316	ALG9	ILMN_1732809	73		final_1									79796	EG:79796	NM_024740	1
LOC651316	ARS2	ILMN_1733295	73		final_1									51593	EG:51593	NM_182800	1
LOC651316	BRF1	ILMN_1736836	73		final_1									2972	EG:2972	NM_145696	1
LOC651316	EFTUD2	ILMN_1738819	73		final_1									9343	EG:9343	NM_004247	1
LOC651316	CREB3L2	ILMN_1751097	73		final_1									64764	EG:64764	NM_194071	1
LOC651316	POGK	ILMN_1756669	73		final_1									57645	EG:57645	NM_017542	1
LOC651316	CCDC130	ILMN_1758633	73		final_1									81576	EG:81576	NM_030818	1
LOC651316	DNMT1	ILMN_1760201	73		final_1									1786	EG:1786	NM_001379	1
LOC651316	FAM62A	ILMN_1761159	73		final_1									23344	EG:23344	NM_015292	1
LOC651316	ABCF1	ILMN_1763875	73		final_1									23	NM_001090	NM_001090	1
LOC651316	PMPCA	ILMN_1764239	73		final_1									23203	EG:23203	NM_015160	1
LOC651316	ENO2	ILMN_1765796	73		final_1									2026	EG:2026	NM_001975	1
LOC651316	SEPT9	ILMN_1769118	73		final_1									10801	EG:10801	NM_006640	1
LOC651316	GIMAP5	ILMN_1769383	73		final_1									55340	EG:55340	NM_018384	1
LOC651316	RNMT	ILMN_1769637	73		final_1									8731	EG:8731	NM_003799	1
LOC651316	TMPRSS9	ILMN_1770387	73		final_1									360200	EG:360200	NM_182973	-1
LOC651316	INTS9	ILMN_1777118	73		final_1									55756	EG:55756	NM_018250	1
LOC651316	PRKCH	ILMN_1780898	73		final_1									5583	EG:5583	NM_006255	1
LOC651316	STAG3L2	ILMN_1791375	73		final_1									442578	EG:442578	NM_001013739	1
LOC651316	FLJ21438	ILMN_1795089	73		final_1									64926	EG:64926	XM_937586	1
LOC651316	PHF15	ILMN_1795285	73		final_1									23338	EG:23338	NM_015288	1
LOC651316	VIL2	ILMN_1795937	73		final_1									7430	EG:7430	NM_003379	1
LOC651316	SF3B3	ILMN_1803110	73		final_1									23450	EG:23450	NM_012426	1
LOC651316	LZTR1	ILMN_1805161	73		final_1									8216	EG:8216	NM_006767	1
LOC651316	PERLD1	ILMN_1805636	73		final_1									93210	EG:93210	NM_033419	1
LOC651316	PFKP	ILMN_1805737	73		final_1									5214	EG:5214	NM_002627	1
LOC651316	MCM3	ILMN_1806818	73		final_1									4172	EG:4172	NM_002388	1
LOC651316	EXOC7	ILMN_1815012	73		final_1									23265	EG:23265	NM_015219	1
LOC651316	ITPR3	ILMN_1815500	73		final_1									3710	EG:3710	NM_002224	1
LOC651316	HS.542825	ILMN_1871288	73		final_1										Hs.542825	NT_005612	1	GTCCCAGCAAGGTGGTAGAGCTAGGACTCAAACCTGGGCTTCCCATTCTG
LOC651316	HS.62314	ILMN_1906158	73		final_1									OBF1	Hs.62314	NT_030059	1	GGCAAACTCAGAAAGACTGTGATAAGGCTCGCCAGAGATGCCTGCACAGG
LOC651316	FAM62B	ILMN_2057573	73		final_1									57488	EG:57488	NM_020728	1
LOC651316	FNBP4	ILMN_2108938	73		final_1									23360	EG:23360	NM_015308	1
LOC651316	FAM24B	ILMN_2140799	73		final_1									196792	EG:196792	NM_152644	1
LOC651316	D2HGDH	ILMN_2206272	73		final_1									NM_152783	EG:728294	NM_152783	1
LOC651316	LCK	ILMN_2279844	73		final_1									3932	EG:3932	NM_005356	1
LOC651316	FTO	ILMN_2288070	73		final_1									79068	EG:79068	NM_001080432	1
LOC651316	OSBPL3	ILMN_2328378	73		final_1									26031	EG:26031	NM_145322	1
LOC651316	CAPRIN2	ILMN_2345739	73		final_1									65981	EG:65981	NM_023925	1
LOC651316	LTBP4	ILMN_2352917	73		final_1									8425	EG:8425	NM_003573	1
LOC651316	MAP4K1	ILMN_2365111	73		final_1									11184	EG:11184	NM_001042600	1
LOC651316	SNRP70	ILMN_2380839	73		final_1									6625	EG:6625	NM_003089	1
LOC651316	URG4	ILMN_2386818	73		final_1									55665	EG:55665	NM_001077664	1
LOC651316	GATA3	ILMN_2406656	73		final_1									2625	EG:2625	NM_002051	1
LOC651316	CLSTN1	ILMN_2415179	73		final_1									22883	EG:22883	NM_001009566	1
IRAK3	LOC648622	ILMN_1652955	62	RPS27 Similar to ribosomal protein S27	final_63									XM_937691	EG:648622	XM_937691	1
IRAK3	MRPS22	ILMN_1655377	62		final_63	o		2	2					56945	EG:56945	NM_020191	1
IRAK3	LOC653773	ILMN_1659405	62	RPL31P17 Ribosomal protein 31 P17	final_63									XM_938755	EG:649682	XM_938755	1
IRAK3	MAP2K1IP1	ILMN_1659415	62		final_63									8649	EG:8649	NM_021970	1
IRAK3	TXNDC17	ILMN_1659437	62		final_63									84817	EG:84817	NM_032731	1
IRAK3	EVI2A	ILMN_1662747	62		final_63									2123	EG:2123	NM_001003927	1
IRAK3	UQCRQ	ILMN_1666471	62		final_63									27089	EG:27089	NM_014402	1
IRAK3	LOC648000	ILMN_1667813	62		final_63									XM_943842	EG:648000	XM_938739	1
IRAK3	RPS3A	ILMN_1673638	62	RPS3AP26	final_63									RPS3A	EG:644972	XR_001449	1
IRAK3	LOC650518	ILMN_1675852	62		final_63									64596	EG:650518	XM_937285	1
IRAK3	LOC641848	ILMN_1679025	62	RPS3A Similar to ribosomal protein S3A	final_63									XM_935588	EG:641848	XM_935588	1
IRAK3	TXN	ILMN_1680314	62		final_63									7295	EG:7295	NM_003329	1
IRAK3	PSMA4	ILMN_1682098	62		final_63									5685	EG:5685	NM_002789	1
IRAK3	CHD4	ILMN_1685551	62		final_63									1108	EG:1108	NM_001273	-1
IRAK3	LOC647340	ILMN_1685774	62		final_63									509	EG:509	NM_005174	1
IRAK3	MRPS23	ILMN_1687359	62		final_63	o		2						51649	EG:51649	NM_016070	1
IRAK3	LOC650276	ILMN_1687738	62	RPL7P6	final_63									90193	EG:650276	XM_939363	1
IRAK3	SF3B14	ILMN_1703720	62		final_63									51639	EG:51639	NM_016047	1
IRAK3	PSMA6	ILMN_1704094	62		final_63									5687	EG:5687	NM_002791	1
IRAK3	VPS29	ILMN_1704619	62		final_63									51699	EG:51699	NM_016226	1
IRAK3	ZNHIT3	ILMN_1705331	62		final_63									9326	EG:9326	NM_001033577	1
IRAK3	LOC391656	ILMN_1706117	62		final_63									391656	EG:391656	XM_373027	1
IRAK3	RPS27L	ILMN_1712678	62		final_63									51065	EG:51065	NM_015920	1
IRAK3	AKR1C3	ILMN_1713124	62		final_63									8644	EG:8644	NM_003739	1
IRAK3	CNIH4	ILMN_1714759	62		final_63									29097	EG:29097	NM_014184	1
IRAK3	MRPS28	ILMN_1718424	62		final_63									28957	EG:28957	NM_014018	1
IRAK3	LY96	ILMN_1724533	62		final_63	o							2	23643	EG:23643	NM_015364	1
IRAK3	B2M	ILMN_1725427	62		final_63									567	EG:567	NM_004048	1
IRAK3	LOC130355	ILMN_1726729	62		final_63									130355	EG:130355	NM_001017927	1
IRAK3	RPL9	ILMN_1729033	62		final_63									6133	NM_001024921	NM_001024921	1
IRAK3	TXNDC9	ILMN_1731137	62		final_63									10190	EG:10190	NM_005783	1
IRAK3	SUB1	ILMN_1736054	62		final_63									10923	NM_006713	NM_006713	1
IRAK3	KYNU	ILMN_1737514	62		final_63									8942	EG:8942	NM_003937	1
IRAK3	C1GALT1C1	ILMN_1751234	62		final_63									29071	EG:29071	NM_001011551	1
IRAK3	NDUFA4	ILMN_1751258	62		final_63									4697	EG:4697	NM_002489	1
IRAK3	RPL23	ILMN_1755115	62		final_63									9349	EG:9349	NM_000978	1
IRAK3	CKS2	ILMN_1756326	62		final_63									1164	EG:1164	NM_001827	1
IRAK3	COMMD6	ILMN_1759997	62		final_63	o		2						170622	EG:170622	NM_203497	1
IRAK3	AP3D1	ILMN_1764945	62		final_63									8943	EG:8943	NM_003938	-1
IRAK3	PDCD10	ILMN_1766024	62		final_63									11235	EG:11235	NM_145860	1
IRAK3	COMMD10	ILMN_1766505	62		final_63									51397	EG:51397	NM_016144	1
IRAK3	FRAP1	ILMN_1769031	62		final_63									2475	EG:2475	NM_004958	-1
IRAK3	MRPL48	ILMN_1773369	62		final_63									51642	EG:51642	NM_016055	1
IRAK3	ERH	ILMN_1781795	62		final_63	o	2	2						2079	EG:2079	NM_004450	1
IRAK3	LOC651064	ILMN_1782417	62		final_63									XM_944489	EG:651064	XM_944489	1
IRAK3	DDX23	ILMN_1784218	62		final_63									9416	EG:9416	NM_004818	-1
IRAK3	ATP6V1G1	ILMN_1784523	62		final_63									9550	EG:9550	NM_004888	1
IRAK3	RPS15A	ILMN_1787949	62		final_63	o		2						6210	NM_001030009	NM_001030009	1
IRAK3	TMCO1	ILMN_1793829	62		final_63									54499	EG:54499	NM_019026	1
IRAK3	SS18L2	ILMN_1796407	62		final_63									51188	EG:51188	NM_016305	1
IRAK3	HINT1	ILMN_1807710	62		final_63									3094	EG:3094	NM_005340	1
IRAK3	NDUFB3	ILMN_2119937	62		final_63									4709	EG:4709	NM_002491	1
IRAK3	TMEM126B	ILMN_2145518	62		final_63									55863	EG:55863	NM_018480	1
IRAK3	C15ORF15	ILMN_2175465	62		final_63									51187	NM_016304	NM_016304	1
IRAK3	COX7B	ILMN_2184049	62		final_63									1349	EG:1349	NM_001866	1
IRAK3	SEDLP	ILMN_2211122	62		final_63									10597	NR_002166	NR_002166	1
IRAK3	LSM1	ILMN_2218450	62		final_63									27257	EG:27257	NM_014462	1
IRAK3	HNMT	ILMN_2284744	62		final_63									3176	EG:3176	NM_006895	1
IRAK3	RPL41	ILMN_2331890	62		final_63									6171	NM_001035267	NM_001035267	1
IRAK3	TAX1BP1	ILMN_2374770	62		final_63									8887	EG:8887	NM_001079864	1
IRAK3	MRPL47	ILMN_2391522	62		final_63									57129	EG:57129	NM_177988	1
IRAK3	LOC402057	ILMN_2407235	62		final_63									402057	NM_001080499	NM_001080499	1
LOC648716	LOC729196	ILMN_1652164	62		final_2									XM_946379	XM_946379	XM_946379	-1
LOC648716	COX19	ILMN_1656656	62		final_2									90639	EG:90639	NM_001031617	1
LOC648716	FAM156A	ILMN_1658160	62		final_2									29057	NM_014138	NM_014138	-1
LOC648716	C10ORF26	ILMN_1658830	62		final_2									54838	EG:54838	NM_017787	-1
LOC648716	NOMO3	ILMN_1663145	62		final_2									408050	NM_001004067	NM_001004067	-1
LOC648716	LOC648024	ILMN_1665736	62		final_2									EIF4A1	XM_943353	XM_943353	-1
LOC648716	LSM6	ILMN_1675462	62		final_2									11157	EG:11157	NM_007080	1
LOC648716	OSBPL9	ILMN_1680932	62		final_2									114883	EG:114883	NM_148909	-1
LOC648716	PIK3R5	ILMN_1681067	62		final_2									23533	EG:23533	NM_014308	-1
LOC648716	FLJ35934	ILMN_1691966	62		final_2									400579	NM_207453	NM_207453	1
LOC648716	LOC642333	ILMN_1696027	62		final_2									XM_939884	XM_939884	XM_939884	1
LOC648716	IDH1	ILMN_1696432	62		final_2									3417	EG:3417	NM_005896	-1
LOC648716	C3ORF38	ILMN_1697742	62		final_2									285237	EG:285237	NM_173824	-1
LOC648716	LOC732007	ILMN_1700025	62		final_2									XM_940732	XM_940732	XM_940732	-1
LOC648716	RNF41	ILMN_1700345	62		final_2									10193	EG:10193	NM_194358	-1
LOC648716	LOC646817	ILMN_1702585	62		final_2									XM_937132	XM_937132	XM_937132	-1
LOC648716	DMXL2	ILMN_1705663	62		final_2									23312	EG:23312	NM_015263	-1
LOC648716	RPL7L1	ILMN_1705908	62		final_2									285855	NM_198486	NM_198486	1
LOC648716	C20ORF94	ILMN_1715625	62		final_2									128710	EG:128710	NM_001009608	1
LOC648716	CRTAP	ILMN_1720484	62		final_2									10491	EG:10491	NM_006371	-1
LOC648716	HCG4	ILMN_1723323	62		final_2									54435	NR_002139	NR_002139	-1
LOC648716	PARN	ILMN_1724811	62		final_2									5073	EG:5073	NM_002582	1
LOC648716	C20ORF45	ILMN_1728168	62		final_2									51012	NM_016045	NM_016045	-1
LOC648716	LOC255809	ILMN_1728392	62		final_2									255809	EG:255809	XM_930239	-1
LOC648716	LILRA1	ILMN_1734748	62		final_2									11024	EG:11024	NM_006863	-1
LOC648716	ALDOA	ILMN_1736700	62		final_2									226	EG:226	NM_184041	-1
LOC648716	MNDA	ILMN_1738992	62		final_2	o		-2						4332	EG:4332	NM_002432	-1
LOC648716	TUBA1C	ILMN_1742167	62		final_2									84790	EG:84790	NM_032704	-1
LOC648716	LOC646675	ILMN_1745702	62		final_2									XM_939756	XM_939756	XM_939756	-1
LOC648716	TUBD1	ILMN_1749253	62		final_2									51174	EG:51174	NM_016261	1
LOC648716	LOC728070	ILMN_1751061	62		final_2									XM_926169	XM_926169	XM_926169	-1
LOC648716	DERPC	ILMN_1751289	62		final_2									54921	EG:54921	NM_017804	-1
LOC648716	MPEG1	ILMN_1752355	62		final_2									219972	XM_166227	XM_166227	-1
LOC648716	NEK8	ILMN_1755138	62		final_2									284086	EG:284086	NM_178170	1
LOC648716	LOC648059	ILMN_1768392	62		final_2									XM_937109	XM_937109	XM_937109	1
LOC648716	TMEM55B	ILMN_1770742	62		final_2									90809	EG:90809	NM_144568	-1
LOC648716	SPG21	ILMN_1771089	62		final_2									51324	EG:51324	XM_945617	-1
LOC648716	FAM63B	ILMN_1774259	62		final_2									54629	EG:54629	NM_019092	1
LOC648716	LOC644774	ILMN_1779258	62		final_2									XM_927868.1	XM_927868	XM_927868	-1
LOC648716	TNFSF13	ILMN_1784264	62		final_2									8741	EG:8741	NM_172088	-1
LOC648716	ARMC8	ILMN_1797453	62		final_2									25852	EG:25852	NM_015396	-1
LOC648716	OCIAD1	ILMN_1799604	62		final_2									54940	EG:54940	NM_017830	1
LOC648716	ARPC4	ILMN_1803183	62		final_2	o				-2				10093	EG:10093	NM_005718	-1
LOC648716	LOC653383	ILMN_1806631	62		final_2									XM_927177.1	ENSG00000212862	XM_927177	-1
LOC648716	HS.354359	ILMN_1846517	62		final_2									NM_014012	Hs.354359	NT_011109 NM_014012 NM_014611 NM_020730 NM_021120	1	TCTCCTACTCCCATCTGGTTGTGCTCGGTGAAGTAGGTGAGCAGTGCTAC
LOC648716	HS.485155	ILMN_1854833	62		final_2									NM_006420	Hs.485155	NT_007592 NM_006420 NM_012219 NM_001085049	-1	CTCAGGCTTCCTTCACACCTCCTTCTCATGGGTGCGGCTGGCAGTACAGT
LOC648716	HS.555947	ILMN_1904481	62		final_2									LEF1	ENSG00000138795	NT_016354 XM_001722268 XM_001720803 NM_033129 NM_004326 NM_022344	1	TGCTGCTCCAGCTTAGACATCAGAGGCGTGAGAGCTGCTTTGAGTTACAG
LOC648716	LOC440157	ILMN_2082893	62		final_2									440157	EG:440157	NM_001013701	1
LOC648716	ARPC1B	ILMN_2085760	62		final_2									10095	NM_005720	NM_005720	-1
LOC648716	LYPLA1	ILMN_2099798	62		final_2									10434	EG:10434	NM_006330	-1
LOC648716	PGAM1	ILMN_2112417	62		final_2									5223	NM_002629	NM_002629	-1
LOC648716	C11ORF38	ILMN_2133784	62		final_2									399967	EG:399967	NM_212555	1
LOC648716	LYZ	ILMN_2162972	62		final_2									4069	EG:4069	NM_000239	-1
LOC648716	DENR	ILMN_2168952	62		final_2									8562	EG:8562	NM_003677	1
LOC648716	C9ORF6	ILMN_2191929	62		final_2									54942	EG:54942	NM_017832	-1
LOC648716	ZNF682	ILMN_2242998	62		final_2									91120	EG:91120	NM_033196	1
LOC648716	UBC	ILMN_2331501	62		final_2									7316	EG:7316	NM_021009	-1
LOC648716	NCK2	ILMN_2356632	62		final_2									8440	NM_003581	NM_003581	1
LOC648716	GGT1	ILMN_2368585	62		final_2									2678	EG:2678	NM_005265	-1
LOC648716	PRDX3	ILMN_2395974	62		final_2									10935	EG:10935	NM_006793	-1
LOC648716	BIRC3	ILMN_2405684	62		final_2									330	EG:330	NM_182962	1
LOC648716	KLF10	ILMN_2411897	62		final_2									7071	EG:7071	NM_005655	-1
WHSC1L1	ZZZ3	ILMN_1653618	62		final_2									26009	EG:26009	NM_015534	1
WHSC1L1	ANKRD12	ILMN_1661833	62		final_2									23253	EG:23253	NM_015208	1
WHSC1L1	ZBED5	ILMN_1664424	62		final_2									58486	EG:58486	NM_021211	1
WHSC1L1	USP15	ILMN_1665557	62		final_2									9958	EG:9958	NM_006313	1
WHSC1L1	ABCB10	ILMN_1665730	62		final_2									23456	EG:23456	NM_012089	1
WHSC1L1	ACRC	ILMN_1666690	62		final_2									93953	EG:93953	NM_052957	1
WHSC1L1	LOC641710	ILMN_1670410	62		final_2									XM_930648	EG:641710	XM_930648	-1
WHSC1L1	IBTK	ILMN_1675669	62	connects 2 stars	final_2									25998	EG:25998	NM_015525	1
WHSC1L1	KIAA0528	ILMN_1682572	62		final_2									9847	EG:9847	NM_014802	1
WHSC1L1	TOPBP1	ILMN_1684929	62		final_2									11073	EG:11073	NM_007027	1
WHSC1L1	SNW1	ILMN_1688413	62		final_2									22938	EG:22938	NM_012245	1
WHSC1L1	PJA2	ILMN_1688702	62		final_2	o			-2					9867	EG:9867	NM_014819	1
WHSC1L1	USO1	ILMN_1692121	62		final_2									8615	EG:8615	NM_003715	1
WHSC1L1	CLK4	ILMN_1695853	62		final_2									57396	EG:57396	NM_020666	1
WHSC1L1	ZDHHC17	ILMN_1697153	62		final_2									23390	EG:23390	NM_015336	1
WHSC1L1	WBP4	ILMN_1697906	62		final_2									11193	EG:11193	NM_007187	1
WHSC1L1	MAPKAPK5	ILMN_1699082	62		final_2									8550	EG:8550	NM_139078	1
WHSC1L1	TMEM135	ILMN_1700202	62		final_2									65084	EG:65084	NM_022918	1
WHSC1L1	RPS6KB1	ILMN_1704557	62		final_2									6198	EG:6198	NM_003161	1
WHSC1L1	RWDD4A	ILMN_1708660	62		final_2									201965	EG:201965	NM_152682	1
WHSC1L1	SCYL2	ILMN_1711919	62		final_2									55681	EG:55681	NM_017988	1
WHSC1L1	SS18L1	ILMN_1715500	62		final_2									26039	EG:26039	NM_198935	1
WHSC1L1	SYTL4	ILMN_1719599	62		final_2									94121	EG:94121	NM_080737	1
WHSC1L1	LEMD3	ILMN_1727361	62		final_2									23592	EG:23592	NM_014319	1
WHSC1L1	TIAL1	ILMN_1728589	62		final_2									7073	EG:7073	NM_003252	1
WHSC1L1	STRAP	ILMN_1731194	62		final_2									11171	EG:11171	NM_007178	1
WHSC1L1	FOXN2	ILMN_1736510	62		final_2									3344	EG:3344	NM_002158	1
WHSC1L1	RB1CC1	ILMN_1736796	62		final_2									9821	EG:9821	NM_014781	1
WHSC1L1	PCMTD1	ILMN_1737426	62		final_2									115294	NM_052937	NM_052937	1
WHSC1L1	OXR1	ILMN_1737462	62		final_2									55074	EG:55074	NM_181354	1
WHSC1L1	RAB11FIP2	ILMN_1741175	62		final_2									22841	EG:22841	NM_014904	1
WHSC1L1	ZNF518A	ILMN_1742541	62		final_2									9849	EG:9849	NM_014803	1
WHSC1L1	MKLN1	ILMN_1742578	62		final_2									4289	EG:4289	NM_013255	1
WHSC1L1	C12ORF26	ILMN_1745497	62		final_2									84190	EG:84190	NM_032230	1
WHSC1L1	STK38L	ILMN_1755792	62		final_2									23012	EG:23012	NM_015000	1
WHSC1L1	REEP5	ILMN_1758941	62		final_2									7905	EG:7905	NM_005669	1
WHSC1L1	DHRS4L2	ILMN_1761450	62		final_2									317749	EG:317749	NM_198083	-1
WHSC1L1	DOCK11	ILMN_1765860	62		final_2									139818	EG:139818	NM_144658	1
WHSC1L1	RBM25	ILMN_1768117	62		final_2									58517	EG:58517	NM_021239	1
WHSC1L1	BCLAF1	ILMN_1775192	62		final_2									9774	NM_014739	NM_014739	1
WHSC1L1	SLMAP	ILMN_1783120	62		final_2									7871	EG:7871	NM_007159	1
WHSC1L1	PRKAA1	ILMN_1783889	62		final_2									5562	EG:5562	NM_206907	1
WHSC1L1	KBTBD2	ILMN_1784540	62		final_2									25948	EG:25948	NM_015483	1
WHSC1L1	PRKAB2	ILMN_1786021	62		final_2									5565	EG:5565	NM_005399	1
WHSC1L1	ARGLU1	ILMN_1788468	62		final_2									55082	EG:55082	NM_018011	1
WHSC1L1	C10ORF137	ILMN_1791656	62		final_2									26098	EG:26098	NM_015608	1
WHSC1L1	STAG1	ILMN_1792435	62		final_2									10274	EG:10274	NM_005862	1
WHSC1L1	HSF2	ILMN_1800311	62		final_2									3298	EG:3298	NM_004506	1
WHSC1L1	ZNF721	ILMN_1805271	62		final_2									170960	EG:170960	NM_133474	1
WHSC1L1	PDIK1L	ILMN_1806328	62		final_2									149420	EG:149420	NM_152835	1
WHSC1L1	HS.133338	ILMN_1833376	62		final_2									0	Hs.133338	NT_037887	1	ACCATTACCCATCTTTCCAAGGCCCATCTAAGTAGTACAGGTGTTTTGTC
WHSC1L1	HS.126768	ILMN_1893511	62		final_2									NM_005263	Hs.126768	NT_023133 NM_005263 XM_001717384 XM_001716851 XR_039471 XR_039358 XR_039561	1	CCGATGTGCAGGCCTCACTGGAAGAGCTTCAAGAGGAGTTTGTGAAACTC
WHSC1L1	HS.137971	ILMN_1897741	62		final_2									NM_012421	Hs.137971	NT_006576 NM_012421	1	GTTTGGGGTGTCAATTTTCTATCAACGCAAACACCTTAGGGTACCCAGAC
WHSC1L1	HS.231861	ILMN_1904135	62		final_2									NP_004468	Hs.231861	NT_022135 NT_078069 NT_078068	1	GGGACGGTGTAGGGAGGCCATGGTCAACTTTTGAGCTACCCTTGAGGGAA
WHSC1L1	SRP9	ILMN_2099594	62		final_2									6726	NM_003133	NM_003133	1
WHSC1L1	SNRK	ILMN_2107184	62		final_2	o			-2					54861	EG:54861	NM_017719	1
WHSC1L1	FAM120A	ILMN_2163306	62		final_2									23196	EG:23196	NM_014612	1
WHSC1L1	MST4	ILMN_2328776	62		final_2									51765	EG:51765	NM_001042453	1
WHSC1L1	STAG2	ILMN_2333708	62		final_2									10735	EG:10735	NM_006603	1
WHSC1L1	TRAPPC6B	ILMN_2369104	62		final_2									122553	EG:122553	NM_001079537	1
WHSC1L1	PPM1B	ILMN_2377210	62		final_2									5495	EG:5495	NM_177969	1
WHSC1L1	MAP4K5	ILMN_2408908	62		final_2									11183	EG:11183	NM_006575	1
HS.495215	LOC647361	ILMN_1652230	56		final_1									RPS29	XM_926273	XM_926273	1
HS.495215	TMCO5	ILMN_1652719	56		final_1									145942	EG:145942	NM_152453	1
HS.495215	RPL27	ILMN_1656807	56		final_1	o		2						6155	EG:6155	NM_000988	1
HS.495215	MDH1	ILMN_1656913	56	connects 2 stars	final_1									4190	EG:4190	NM_005917	-1
HS.495215	LOC285900	ILMN_1657612	56		final_1	o	0		2					285900	XM_926623	XM_926623	1
HS.495215	RPL17	ILMN_1658283	56		final_1									XM_927165.1	XM_927165	XM_927165	1
HS.495215	TIMP2	ILMN_1664583	56		final_1									7077	EG:7077	XM_941104	-1
HS.495215	FAU	ILMN_1664614	56		final_1									2197	EG:2197	NM_001997	1
HS.495215	RPS14	ILMN_1666635	56		final_1	o		2	2					6208	EG:6208	NM_001025071	1
HS.495215	LOC388524	ILMN_1667114	56		final_1									388524	NM_001005472	NM_001005472	1
HS.495215	FOS	ILMN_1669523	56		final_1									2353	EG:2353	NM_005252	-1
HS.495215	MRPL13	ILMN_1671158	56		final_1									28998	EG:28998	NM_014078	1
HS.495215	ZNF32	ILMN_1673112	56		final_1									7580	EG:7580	NM_001005368	1
HS.495215	LOC646483	ILMN_1673738	56		final_1	o			2	2				XM_935384	XM_930551	XM_930551	1
HS.495215	DYNLT1	ILMN_1678766	56		final_1									6993	EG:6993	NM_006519	1
HS.495215	C1ORF41	ILMN_1681340	56		final_1									51668	EG:51668	NM_016126	1
HS.495215	LOC440737	ILMN_1683447	56		final_1									440737	XM_496446	XM_496446	1
HS.495215	RPS10	ILMN_1686954	56		final_1	o			2					6204	NM_001014	NM_001014	1
HS.495215	COMMD3	ILMN_1690392	56		final_1									23412	EG:23412	NM_012071	1
HS.495215	SEC11A	ILMN_1693490	56		final_1	o			2					23478	EG:23478	NM_014300	1
HS.495215	PRIM1	ILMN_1694502	56		final_1									5557	EG:5557	NM_000946	1
HS.495215	MAD2L1BP	ILMN_1694711	56		final_1	o					-2			9587	EG:9587	NM_014628	1
HS.495215	MRPL24	ILMN_1695576	56		final_1									79590	EG:79590	NM_024540	1
HS.495215	C14ORF112	ILMN_1706305	56		final_1									51241	EG:51241	NM_016468	1
HS.495215	RPL6	ILMN_1712155	56		final_1									RPL6	XM_935991	XM_935991	1
HS.495215	DDX50	ILMN_1712320	56		final_1									79009	EG:79009	NM_024045	1
HS.495215	CD3D	ILMN_1724643	56		final_1	o			2					915	EG:915	NM_000732	1
HS.495215	RPS25	ILMN_1746516	56		final_1	o	0							6230	EG:6230	NM_001028	1
HS.495215	PLRG1	ILMN_1749634	56		final_1									5356	EG:5356	NM_002669	1
HS.495215	RPS18	ILMN_1753534	56		final_1									6222	NM_022551	NM_022551	1
HS.495215	PPIL5	ILMN_1758085	56		final_1									122769	EG:122769	NM_203466	1
HS.495215	ZCCHC17	ILMN_1761844	56		final_1									51538	EG:51538	NM_016505	1
HS.495215	PSMC2	ILMN_1768784	56		final_1									5701	EG:5701	NM_002803	1
HS.495215	SNRPD2	ILMN_1771060	56		final_1	o			2					6633	NM_177542	NM_177542	1
HS.495215	LOC642250	ILMN_1771861	56		final_1									RPL17L	EG:642250	XM_925774	1
HS.495215	XAB1	ILMN_1772719	56		final_1									11321	EG:11321	NM_007266	1
HS.495215	LOC646766	ILMN_1775243	56		final_1									11224	EG:11224	NM_007209	1
HS.495215	GZMA	ILMN_1779324	56		final_1									3001	EG:3001	NM_006144	1
HS.495215	LOC441246	ILMN_1788742	56		final_1	o		2						441246	EG:441246	XM_496890	1
HS.495215	CCDC25	ILMN_1789266	56		final_1									55246	EG:55246	NM_018246	1
HS.495215	EMG1	ILMN_1797074	56		final_1									10436	EG:10436	NM_006331	1
HS.495215	ACAT1	ILMN_1800008	56		final_1									38	EG:38	NM_000019	1
HS.495215	C12ORF62	ILMN_1804656	56		final_1									84987	EG:84987	NM_032901	1
HS.495215	RWDD1	ILMN_1812970	56		final_1									51389	EG:51389	NM_016104	1
HS.495215	LOC401397	ILMN_1857915	56		final_1									401397	Hs.117929	XR_040259 XR_040260 XR_040261 XR_040262 NT_007933 NT_010718 NT_011362	1	GGCCTACTGAGTCAAACCTCACCCTGAAAACCTTTGCGCTTTAGAGGCTA
HS.495215	HS.571035	ILMN_1897890	56		final_1									NM_032266	Hs.571035	NM_032266 XR_039695 XR_038625 NT_007422	1	GCAGAGGCAGCACAGGGAGGTAAAGCAATGGAAAAGATCGCAGGGAGTCC
HS.495215	TOMM7	ILMN_2087060	56		final_1	o			2					54543	EG:54543	NM_019059	1
HS.495215	PHF5A	ILMN_2112402	56		final_1									84844	EG:84844	NM_032758	1
HS.495215	RPL35	ILMN_2142815	56		final_1	o		2						11224	EG:11224	NM_007209	1
HS.495215	RPL24	ILMN_2160388	56		final_1	o			2					6152	EG:6152	NM_000986	1
HS.495215	RPS17	ILMN_2207539	56		final_1	o	0							6218	ENSG00000184779	NM_001021	1
HS.495215	IAH1	ILMN_2217329	56		final_1									285148	EG:285148	NM_001039613	1
HS.495215	TMEM126A	ILMN_2217809	56		final_1									84233	EG:84233	NM_032273	1
HS.495215	ACTN1	ILMN_2232177	56		final_1									87	EG:87	NM_001102	-1
HS.495215	GNL3	ILMN_2324056	56		final_1	o		2						26354	EG:26354	NM_206826	1
HS.495215	EEF1D	ILMN_2408039	56		final_1									1936	NM_032378	NM_032378	1
ANKRD36B	SEC61A1	ILMN_1659564	44		final_10									29927	EG:29927	NM_013336	1
ANKRD36B	LOC730316	ILMN_1662130	44		final_10									9883	EG:9883	NM_172020	1
ANKRD36B	RANGAP1	ILMN_1662198	44		final_10									5905	EG:5905	NM_002883	1
ANKRD36B	AARS	ILMN_1662364	44		final_10									16	EG:16	NM_001605	1
ANKRD36B	RNF126	ILMN_1669572	44		final_10									55658	EG:55658	NM_194460	1
ANKRD36B	HIRIP3	ILMN_1678037	44		final_10									8479	EG:8479	NM_003609	1
ANKRD36B	TTC4	ILMN_1678140	44		final_10									7268	EG:7268	NM_004623	1
ANKRD36B	SLC37A4	ILMN_1678678	44		final_10									2542	EG:2542	NM_001467	1
ANKRD36B	C3ORF62	ILMN_1679339	44		final_10									375341	EG:375341	NM_198562	-1
ANKRD36B	LOC642047	ILMN_1679819	44		final_10									XM_936157	EG:642047	XM_936157	1
ANKRD36B	C16ORF58	ILMN_1685289	44		final_10									64755	EG:64755	NM_022744	1
ANKRD36B	KIAA0194	ILMN_1694686	44		final_10									22993	EG:22993	XM_940209	1
ANKRD36B	RBM14	ILMN_1700604	44		final_10									10432	EG:10432	NM_006328	1
ANKRD36B	SF3A3	ILMN_1705151	44		final_10									10946	EG:10946	NM_006802	1
ANKRD36B	C17ORF70	ILMN_1711823	44		final_10									80233	EG:80233	NM_025161	1
ANKRD36B	FAM113B	ILMN_1712431	44		final_10									91523	EG:91523	NM_138371	1
ANKRD36B	CARD11	ILMN_1721978	44		final_10									84433	EG:84433	NM_032415	1
ANKRD36B	LOC650557	ILMN_1725170	44		final_10	o	0		2					XM_942240	EG:650557	XM_942240	1
ANKRD36B	HDAC1	ILMN_1727458	44		final_10									3065	EG:3065	NM_004964	1
ANKRD36B	RPUSD2	ILMN_1730077	44		final_10									27079	EG:27079	NM_152260	1
ANKRD36B	CCDC92	ILMN_1731107	44		final_10									80212	EG:80212	NM_025140	1
ANKRD36B	TXLNA	ILMN_1737084	44		final_10									200081	EG:200081	NM_175852	1
ANKRD36B	EEF2	ILMN_1738383	44		final_10									1938	EG:1938	NM_001961	1
ANKRD36B	LOC391811	ILMN_1746252	44		final_10									5425	EG:5425	NM_006230	1
ANKRD36B	HNRNPD	ILMN_1751368	44		final_10									3184	EG:3184	NM_001003810	1
ANKRD36B	LOC400455	ILMN_1754865	44		final_10									8761	EG:8761	NM_003819	1
ANKRD36B	ARHGAP17	ILMN_1756693	44		final_10									55114	EG:55114	NM_001006634	1
ANKRD36B	QARS	ILMN_1763080	44		final_10									5859	EG:5859	NM_005051	1
ANKRD36B	MFNG	ILMN_1764577	44		final_10									4242	EG:4242	NM_002405	1
ANKRD36B	GEMIN4	ILMN_1770206	44		final_10									50628	EG:50628	NM_015721	1
ANKRD36B	VEGFB	ILMN_1772274	44		final_10									7423	EG:7423	XM_938483	1
ANKRD36B	GTPBP6	ILMN_1776080	44		final_10									8225	EG:8225	NM_012227	1
ANKRD36B	COG2	ILMN_1776993	44		final_10									22796	EG:22796	NM_007357	1
ANKRD36B	PUF60	ILMN_1779404	44		final_10									22827	EG:22827	NM_014281	1
ANKRD36B	KIAA0859	ILMN_1790575	44		final_10									51603	EG:51603	NM_015935	1
ANKRD36B	C11ORF80	ILMN_1790637	44		final_10									79703	EG:79703	NM_024650	1
ANKRD36B	SLC22A4	ILMN_2050911	44		final_10									6583	EG:6583	NM_003059	-1
ANKRD36B	C11ORF2	ILMN_2077094	44		final_10									738	NM_013265	NM_013265	1
ANKRD36B	MDH2	ILMN_2079004	44		final_10									4191	EG:4191	NM_005918	1
ANKRD36B	MEPCE	ILMN_2180827	44		final_10									56257	EG:56257	NM_019606	1
ANKRD36B	DHX37	ILMN_2192683	44		final_10									57647	EG:57647	NM_032656	1
ANKRD36B	ERP29	ILMN_2251184	44		final_10									10961	EG:10961	NM_006817	1
ANKRD36B	CYFIP2	ILMN_2264981	44		final_10									26999	EG:26999	NM_001037333	1
ANKRD36B	AIFM1	ILMN_2313821	44		final_10									9131	EG:9131	NM_145813	1
HS.413494	GUCY1B2	ILMN_1652166	42		final_2									2974	EG:2974	NM_004129	-1
HS.413494	CHD1	ILMN_1654583	42		final_2									1105	EG:1105	NM_001270	1
HS.413494	C14ORF106	ILMN_1666208	42		final_2									55320	EG:55320	NM_018353	1
HS.413494	MYNN	ILMN_1672287	42		final_2									55892	EG:55892	NM_018657	1
HS.413494	IBTK	ILMN_1675669	42	connects 2 stars	final_2									25998	EG:25998	NM_015525	1
HS.413494	PNPLA8	ILMN_1680223	42		final_2									50640	EG:50640	NM_015723	1
HS.413494	DYNLT3	ILMN_1681890	42		final_2									6990	EG:6990	NM_006520	1
HS.413494	ITGAE	ILMN_1683927	42		final_2									3682	EG:3682	NM_002208	1
HS.413494	RAB18	ILMN_1691143	42		final_2									22931	EG:22931	NM_021252	1
HS.413494	HAT1	ILMN_1693905	42		final_2									8520	EG:8520	NM_003642	1
HS.413494	ACTR6	ILMN_1697585	42		final_2									64431	EG:64431	NM_022496	1
HS.413494	PMS1	ILMN_1700847	42		final_2									5378	EG:5378	NM_000534	1
HS.413494	SAP30	ILMN_1700896	42		final_2									8819	EG:8819	NM_003864	1
HS.413494	LOC440928	ILMN_1713764	42		final_2									440928	EG:440928	XM_942885	1
HS.413494	DCUN1D5	ILMN_1726839	42		final_2									84259	EG:84259	NM_032299	1
HS.413494	EFHA1	ILMN_1738346	42		final_2									221154	EG:221154	NM_152726	1
HS.413494	TMEM167	ILMN_1742813	42		final_2									153339	EG:153339	NM_174909	1
HS.413494	DEK	ILMN_1747630	42		final_2									7913	EG:7913	NM_003472	1
HS.413494	IDI1	ILMN_1755075	42		final_2									3422	EG:3422	NM_004508	1
HS.413494	IER3IP1	ILMN_1763539	42		final_2									51124	EG:51124	NM_016097	1
HS.413494	SACM1L	ILMN_1765019	42		final_2									22908	EG:22908	NM_014016	1
HS.413494	SCOC	ILMN_1768050	42		final_2									60592	EG:60592	NM_032547	1
HS.413494	BIRC2	ILMN_1768194	42		final_2									329	EG:329	NM_001166	1
HS.413494	CAPZA2	ILMN_1768870	42		final_2									830	EG:830	NM_006136	1
HS.413494	DNAJA2	ILMN_1770127	42		final_2									10294	EG:10294	NM_005880	1
HS.413494	MED21	ILMN_1773886	42		final_2									9412	EG:9412	NM_004264	1
HS.413494	AGL	ILMN_1775082	42		final_2									178	EG:178	NM_000646	1
HS.413494	GBAS	ILMN_1778611	42		final_2									2631	EG:2631	NM_001483	1
HS.413494	NXT2	ILMN_1785107	42		final_2	o					2			55916	EG:55916	NM_018698	1
HS.413494	VPS36	ILMN_1802519	42		final_2									51028	EG:51028	NM_016075	1
HS.413494	TMEM77	ILMN_1808634	42		final_2									128338	EG:128338	NM_178454	1
HS.413494	HS.556018	ILMN_1898682	42		final_2									NM_207497	Hs.556018	NM_207497 NM_152570 NT_007299	1	ACAGCAGTTTCACACCAGAATAGCAGTGCCCTTTCTTTTTGTACATACTG
HS.413494	CD48	ILMN_2061043	42		final_2									962	EG:962	NM_001778	1
HS.413494	GMFB	ILMN_2093674	42		final_2									2764	EG:2764	NM_004124	1
HS.413494	GIMAP2	ILMN_2135272	42		final_2									26157	EG:26157	NM_015660	1
HS.413494	CD69	ILMN_2188333	42		final_2									969	EG:969	NM_001781	1
HS.413494	GCNT1	ILMN_2225135	42		final_2									2650	EG:2650	NM_001490	1
HS.413494	MRPL3	ILMN_2230592	42		final_2									11222	EG:11222	NM_007208	1
HS.413494	SNX14	ILMN_2361575	42		final_2									57231	EG:57231	NM_020468	1
HS.413494	ACSL4	ILMN_2391458	42		final_2	o			-2					2182	EG:2182	NM_022977	1
HS.413494	SAR1B	ILMN_2394296	42		final_2									51128	EG:51128	NM_001033503	1
HS.413494	RAP1B	ILMN_2398474	42		final_2									5908	EG:5908	NM_015646	1
HS.540667	COX4I1	ILMN_1652207	35		final_25									1327	EG:1327	NM_001861	1
HS.540667	LOC643433	ILMN_1661306	35		final_25									XM_928197	EG:643433	XM_928197	1
HS.540667	STAT3	ILMN_1663618	35		final_25									6774	EG:6774	NM_213662	-1
HS.540667	NME3	ILMN_1669456	35		final_25									4832	EG:4832	NM_002513	1
HS.540667	COX5A	ILMN_1704477	35		final_25									9377	EG:9377	NM_004255	1
HS.540667	CYB5A	ILMN_1714167	35		final_25									1528	EG:1528	NM_148923	1
HS.540667	C7ORF50	ILMN_1718336	35		final_25									84310	EG:84310	NM_032350	1
HS.540667	TMED3	ILMN_1719316	35		final_25									23423	EG:23423	NM_007364	1
HS.540667	SLC2A8	ILMN_1724609	35		final_25									29988	EG:29988	NM_014580	1
HS.540667	AYP1P1	ILMN_1754400	35		final_25									386608	EG:386608	XR_001434	1
HS.540667	RAB5C	ILMN_1769665	35		final_25									5878	EG:5878	NM_201434	-1
HS.540667	DYNLL2	ILMN_1772796	35		final_25									140735	EG:140735	NM_080677	1
HS.540667	TRAPPC6A	ILMN_1775703	35		final_25									79090	EG:79090	NM_024108	1
HS.540667	TSPAN17	ILMN_1777881	35		final_25									26262	EG:26262	NM_012171	1
HS.540667	FAM96B	ILMN_1779813	35		final_25									51647	EG:51647	NM_016062	1
HS.540667	AK1	ILMN_1779965	35		final_25									203	EG:203	NM_000476	1
HS.540667	LYN	ILMN_1781155	35		final_25									4067	EG:4067	NM_002350	-1
HS.540667	SIVA	ILMN_1787248	35		final_25									10572	EG:10572	NM_006427	1
HS.540667	LOC643313	ILMN_1789965	35		final_25									XM_933038	XM_933038	XM_933038	-1
HS.540667	LSP1	ILMN_1791623	35		final_25									4046	EG:4046	NM_001013254	-1
HS.540667	ATP5H	ILMN_1794912	35		final_25									10476	EG:10476	NM_001003785	1
HS.540667	DNCL1	ILMN_1795227	35		final_25									8655	EG:8655	NM_003746	1
HS.540667	MGMT	ILMN_1795639	35		final_25									4255	EG:4255	NM_002412	1
HS.540667	POLR3K	ILMN_1801664	35		final_25									51728	EG:51728	NM_016310	1
HS.540667	MRPS24	ILMN_1802553	35		final_25									64951	EG:64951	NM_032014	1
HS.540667	FAM129A	ILMN_1810725	35		final_25									116496	EG:116496	NM_022083	-1
HS.540667	HS.143408	ILMN_1852793	35		final_25									NM_021184	Hs.143408	XM_001718463 XM_001719743 XM_001716604 NM_021184 XM_001718736 NT_011255 NT_026437	1	GGCGACACCCTTGCCCAAGCTGGATTTTGCAGACCTGGTAGGCGTGAGAT
HS.540667	HS.397465	ILMN_1912737	35		final_25									DKFZp686F1546	Hs.397465	XR_037301 XR_037591 XR_037450 NM_152717 NM_001098835 NM_152988 NM_001077238 NM_032730 NM_022482 NM_001722 NM_020133 NT_007933	-1	GGGCCAGAATCCCCAAGGTTCCCTTTTTTGTTCATCAGGCCCTTCCTGAG
HS.540667	ACTB	ILMN_2038777	35		final_25									60	EG:60	NM_001101	-1
HS.540667	CCDC28B	ILMN_2099586	35		final_25									79140	EG:79140	NM_024296	1
HS.540667	PLXNC1	ILMN_2117623	35		final_25									10154	EG:10154	NM_005761	-1
HS.540667	RPP21	ILMN_2186597	35		final_25									79897	EG:79897	NM_024839	1
HS.540667	CHCHD2	ILMN_2191681	35		final_25									51142	NM_016139	NM_016139	1
HS.540667	TXNRD1	ILMN_2324421	35		final_25									7296	EG:7296	NM_182743	-1
HS.540667	MRPS12	ILMN_2371964	35		final_25									6183	EG:6183	NM_033363	1
C20ORF134	HSPA1L	ILMN_1654566	34		final_1									3305	EG:3305	NM_005527	1
C20ORF134	HOMER2	ILMN_1671486	34		final_1									9455	EG:9455	NM_004839	-1
C20ORF134	ISCA1L	ILMN_1672024	34		final_1									389293	XM_931683	XM_931683	-1
C20ORF134	RHOC	ILMN_1673305	34		final_1									389	EG:389	NM_175744	-1
C20ORF134	TIMM23	ILMN_1679555	34		final_1									10431	EG:10431	NM_006327	-1
C20ORF134	CREG1	ILMN_1680624	34		final_1									8804	EG:8804	NM_003851	-1
C20ORF134	LOC391356	ILMN_1692707	34		final_1	o	2							391356	EG:391356	NM_001013663	-1
C20ORF134	TMEM43	ILMN_1698605	34		final_1									79188	EG:79188	NM_024334	1
C20ORF134	PHF21A	ILMN_1699496	34		final_1									51317	EG:51317	NM_016621	1
C20ORF134	SAFB	ILMN_1722059	34		final_1									6294	EG:6294	NM_002967	1
C20ORF134	COPS4	ILMN_1726755	34		final_1									51138	EG:51138	NM_016129	-1
C20ORF134	BRD1	ILMN_1730019	34		final_1									23774	EG:23774	NM_014577	1
C20ORF134	ELL	ILMN_1736048	34		final_1									8178	EG:8178	NM_006532	1
C20ORF134	TAF4	ILMN_1737535	34		final_1									6874	EG:6874	NM_003185	1
C20ORF134	TRIM8	ILMN_1746704	34		final_1									81603	EG:81603	NM_030912	1
C20ORF134	RTN2	ILMN_1749115	34		final_1									6253	EG:6253	NM_206902	-1
C20ORF134	JARID2	ILMN_1764177	34		final_1									3720	EG:3720	NM_004973	1
C20ORF134	LOC146517	ILMN_1764186	34		final_1									146517	XM_928464	XM_928464	1
C20ORF134	PIK3CD	ILMN_1766275	34		final_1									5293	EG:5293	NM_005026	1
C20ORF134	PROK2	ILMN_1775257	34		final_1									60675	EG:60675	NM_021935	1
C20ORF134	LAMP1	ILMN_1782292	34		final_1									3916	EG:3916	NM_005561	1
C20ORF134	BOLA2	ILMN_1782633	34	Close to MAZ	final_1	o			2					NM_001031827	NM_001031827	NM_001031827	-1
C20ORF134	C16ORF61	ILMN_1783333	34		final_1									56942	EG:56942	NM_020188	-1
C20ORF134	LOC642197	ILMN_1783469	34		final_1									51115	EG:51115	NM_016033	-1
C20ORF134	ZZEF1	ILMN_1786396	34		final_1									23140	EG:23140	NM_015113	1
C20ORF134	NDRG1	ILMN_1809931	34		final_1									10397	EG:10397	NM_006096	1
C20ORF134	HS.530359	ILMN_1817377	34		final_1										Hs.530359	XM_001715622 XM_001714912 XM_001714405 NM_172217 NT_011651	1	CCACAACCCTGTGAGGGACTTCCTGTTATTGTCTCCGTTTTACTGGTGAG
C20ORF134	NDUFB2	ILMN_2117330	34		final_1									4708	EG:4708	NM_004546	-1
C20ORF134	ALG13	ILMN_2147503	34		final_1									55849	EG:55849	NM_018466	-1
C20ORF134	ICAM3	ILMN_2212763	34		final_1	o		-2						3385	EG:3385	NM_002162	1
C20ORF134	ATP5S	ILMN_2299843	34		final_1									27109	EG:27109	NM_015684	-1
C20ORF134	BRD8	ILMN_2349600	34		final_1									10902	EG:10902	NM_183359	1
C20ORF134	RASSF5	ILMN_2362902	34		final_1									83593	EG:83593	NM_182664	1
C20ORF134	FPR2	ILMN_2392569	34		final_1									2358	EG:2358	NM_001462	1
HS.574542	LOC728492	ILMN_1655444	33		final_1	o						2		8293	ENSG00000172058	XM_936926	-1
HS.574542	ARPC3	ILMN_1655561	33		final_1									10094	EG:10094	NM_005719	-1
HS.574542	MDH1	ILMN_1656913	33	connects 2 stars	final_1									4190	EG:4190	NM_005917	1
HS.574542	EDG4	ILMN_1662741	33		final_1									9170	EG:9170	NM_004720	1
HS.574542	HRASLS3	ILMN_1667711	33		final_1									11145	EG:11145	NM_007069	-1
HS.574542	PIGY	ILMN_1672366	33		final_1									84992	EG:84992	NM_032906	-1
HS.574542	TYK2	ILMN_1676955	33		final_1									7297	EG:7297	NM_003331	1
HS.574542	BXDC2	ILMN_1679800	33		final_1									55299	EG:55299	NM_018321	-1
HS.574542	LOC730994	ILMN_1680774	33		final_1									22861	EG:22861	NM_001033053	1
HS.574542	MYO1F	ILMN_1681239	33		final_1									4542	EG:4542	NM_012335	1
HS.574542	UPF1	ILMN_1688011	33		final_1									5976	EG:5976	NM_002911	1
HS.574542	LOC341457	ILMN_1688127	33		final_1									341457	XM_292085	XM_292085	-1
HS.574542	TCIRG1	ILMN_1694486	33		final_1									10312	EG:10312	NM_006019	1
HS.574542	LOC652595	ILMN_1702783	33		final_1									XM_942117.1	EG:652595	XM_942117	-1
HS.574542	ACSS2	ILMN_1742859	33		final_1									55902	EG:55902	NM_139274	1
HS.574542	MBD6	ILMN_1746012	33		final_1									114785	EG:114785	NM_052897	1
HS.574542	ATG2A	ILMN_1756006	33		final_1									23130	EG:23130	NM_015104	1
HS.574542	ARMCX6	ILMN_1768226	33		final_1									54470	EG:54470	NM_019007	-1
HS.574542	OCIAD2	ILMN_1772286	33	connects 2 stars	final_1									132299	EG:132299	NM_152398	-1
HS.574542	CENTD2	ILMN_1786357	33		final_1									116985	EG:116985	NM_015242	1
HS.574542	CFLAR	ILMN_1789830	33		final_1									8837	EG:8837	NM_003879	1
HS.574542	PISD	ILMN_1793934	33		final_1									23761	EG:23761	NM_014338	1
HS.574542	FKBP15	ILMN_1804863	33		final_1									23307	EG:23307	XM_936355	1
HS.574542	IQSEC1	ILMN_1808299	33		final_1									9922	EG:9922	NM_014869	1
HS.574542	PRMT5	ILMN_1811955	33		final_1									10419	EG:10419	NM_006109	1
HS.574542	HS.568805	ILMN_1843640	33		final_1									NM_020808	Hs.568805	NM_020808 NM_021638 NM_198595 NM_032292 NM_001037533 NM_022169 NM_153834 NM_014431 NM_004487 NT_008705	-1	GCCAGAGTGTGGAAGGAGTGACAGCACAGAGGAAGAGATGGTCCAAGACC
HS.574542	HS.490981	ILMN_1911719	33		final_1									MSRA	ENSG00000175806	NM_182496 NM_013980 NM_013978 NM_153215 NT_077531	1	CATGCCTAGTGCCTGCCCCAGTGCAGATGCTCAGGAAATATCGTCCTTAC
HS.574542	TBC1D3G	ILMN_2068991	33		final_1									NM_001040282.1	NM_001040282	NM_001040282	1
HS.574542	RCAN2	ILMN_2120210	33		final_1	o			2				-2	10231	EG:10231	NM_005822	-1
HS.574542	ARMET	ILMN_2183510	33		final_1									7873	EG:7873	NM_006010	-1
HS.574542	LOC134997	ILMN_2205211	33		final_1									134997	NR_000030	NR_000030	-1
HS.574542	SREBF1	ILMN_2328986	33		final_1									6720	EG:6720	NM_004176	1
HS.574542	C2ORF28	ILMN_2386016	33		final_1									51374	EG:51374	NM_080592	-1
LOC387870	PPM1D	ILMN_1670875	33		final_2	o	0	-2		-2				8493	EG:8493	NM_003620	-1
LOC387870	PGM2	ILMN_1673543	33		final_2									55276	EG:55276	NM_018290	-1
LOC387870	C14ORF147	ILMN_1699676	33		final_2									171546	EG:171546	NM_138288	-1
LOC387870	CPD	ILMN_1703074	33		final_2									1362	EG:1362	NM_001304	-1
LOC387870	AZIN1	ILMN_1704550	33		final_2									51582	EG:51582	NM_015878	-1
LOC387870	DSE	ILMN_1706498	33		final_2									29940	EG:29940	NM_013352	-1
LOC387870	WDTC1	ILMN_1707600	33		final_2									23038	EG:23038	NM_015023	1
LOC387870	2009-03-07	ILMN_1717337	33		final_2									64844	EG:64844	NM_022826	-1
LOC387870	APEH	ILMN_1718023	33		final_2									327	EG:327	NM_001640	1
LOC387870	SCAMP1	ILMN_1728907	33		final_2									9522	EG:9522	NM_052822	-1
LOC387870	SNX4	ILMN_1738736	33		final_2									8723	EG:8723	NM_003794	-1
LOC387870	NDFIP1	ILMN_1751452	33		final_2									80762	EG:80762	NM_030571	-1
LOC387870	ZNF526	ILMN_1756631	33		final_2									116115	EG:116115	NM_133444	1
LOC387870	MAPK6	ILMN_1757287	33		final_2									5597	EG:5597	NM_002748	-1
LOC387870	DR1	ILMN_1759983	33		final_2									1810	EG:1810	NM_001938	-1
LOC387870	NETO2	ILMN_1760849	33		final_2									81831	EG:81831	NM_018092	-1
LOC387870	CENTB2	ILMN_1766798	33		final_2									23527	EG:23527	NM_012287	-1
LOC387870	FOXP1	ILMN_1768248	33		final_2									27086	EG:27086	NM_001012505	1
LOC387870	ZDHHC2	ILMN_1769783	33		final_2									51201	EG:51201	NM_016353	-1
LOC387870	BNIP2	ILMN_1770803	33		final_2									663	EG:663	NM_004330	-1
LOC387870	ATP8B4	ILMN_1783956	33		final_2									79895	EG:79895	NM_024837	-1
LOC387870	TMED5	ILMN_1803279	33		final_2									50999	EG:50999	NM_016040	-1
LOC387870	TUSC2	ILMN_1804329	33		final_2									11334	EG:11334	NM_007275	-1
LOC387870	VTA1	ILMN_1813010	33		final_2									51534	EG:51534	NM_016485	-1
LOC387870	HS.550293	ILMN_1818346	33		final_2									DKFZp434I0227	Hs.550293	NM_014777 NM_005048 NM_001003845	1	GAATAGGGCAAGACTAAAGGACAGAGTAAGGGTGCTGGCCGCCACCTGAC
LOC387870	PLEKHF2	ILMN_2106449	33		final_2									79666	EG:79666	NM_024613	-1
LOC387870	PDCD6IP	ILMN_2111323	33		final_2									10015	EG:10015	NM_013374	-1
LOC387870	FBXO30	ILMN_2168992	33		final_2									84085	EG:84085	NM_032145	-1
LOC387870	SAMSN1	ILMN_2171289	33		final_2									64092	EG:64092	NM_022136	-1
LOC387870	ZNF471	ILMN_2191720	33		final_2									57573	EG:57573	NM_020813	-1
LOC387870	STARD3NL	ILMN_2228873	33		final_2									83930	EG:83930	NM_032016	-1
LOC387870	UBE2A	ILMN_2307455	33		final_2									7319	EG:7319	NM_181762	-1
LOC387870	CGGBP1	ILMN_2387090	33		final_2									8545	EG:8545	NM_003663	-1
PTPRN	ZNF580	ILMN_1653310	33		final_53									51157	EG:51157	NM_207115	1
PTPRN	C19ORF23	ILMN_1657148	33		final_53									148046	EG:148046	NM_152480	1
PTPRN	LOC643274	ILMN_1657238	33		final_53									XM_931454	XM_931454	XM_931454	1
PTPRN	ZC3H18	ILMN_1658834	33		final_53									124245	EG:124245	NM_144604	1
PTPRN	C21ORF128	ILMN_1663893	33		final_53									150147	NM_152507	NM_152507	1
PTPRN	LOC646562	ILMN_1665970	33		final_53									XM_933700	XM_933700	XM_933700	1
PTPRN	LOC401677	ILMN_1669233	33		final_53									401677	XM_497272	XM_497272	1
PTPRN	AP2A1	ILMN_1673108	33		final_53									160	EG:160	NM_014203	1
PTPRN	LOC642644	ILMN_1677372	33		final_53									XM_930972.1	XM_930972	XM_930972	1
PTPRN	CLDN9	ILMN_1683757	33		final_53									XM_929011	XM_929011	XM_929011	1
PTPRN	C5AR1	ILMN_1689836	33		final_53									728	EG:728	NM_001736	1
PTPRN	JPH1	ILMN_1693985	33		final_53									56704	EG:56704	NM_020647	1
PTPRN	STRN4	ILMN_1696190	33		final_53									29888	EG:29888	NM_013403	1
PTPRN	LOC643402	ILMN_1705749	33		final_53									XM_926737.1	XM_926737	XM_926737	1
PTPRN	ISLR	ILMN_1711009	33		final_53									3671	EG:3671	NM_201526	1
PTPRN	TTC7B	ILMN_1718971	33		final_53									145567	EG:145567	NM_001010854	1
PTPRN	OR4C13	ILMN_1730984	33		final_53									283092	EG:283092	NM_001001955	1
PTPRN	C19ORF47	ILMN_1735608	33		final_53									126526	EG:126526	NM_178830	1
PTPRN	LOC647920	ILMN_1740088	33		final_53									XM_943115	XM_943115	XM_943115	1
PTPRN	SHKBP1	ILMN_1765493	33		final_53									92799	EG:92799	NM_138392	1
PTPRN	SIPA1L3	ILMN_1765872	33		final_53									23094	EG:23094	NM_015073	1
PTPRN	CLK2	ILMN_1787109	33		final_53									1196	EG:1196	XM_941392	1
PTPRN	CITED4	ILMN_1787691	33		final_53									163732	EG:163732	NM_133467	1
PTPRN	PNPLA2	ILMN_1787923	33		final_53									57104	EG:57104	NM_020376	1
PTPRN	MLPH	ILMN_1795342	33		final_53									79083	EG:79083	NM_024101	1
PTPRN	C19ORF22	ILMN_1808202	33		final_53									91300	EG:91300	NM_138774	1
PTPRN	HOXA6	ILMN_1815570	33		final_53									3203	EG:3203	NM_024014	1
PTPRN	HS.568870	ILMN_1819028	33		final_53									NM_031308	Hs.568870	NM_031308 NM_004776 XM_001719595 NM_001080463 NR_002184 NT_030059	1	AGTGGACTCAATTAAAGTGGGAAGCAGGTGTCTAGGTTCCAGGGCTGCTC
PTPRN	HS.569921	ILMN_1839217	33		final_53									NM_152629	Hs.569921	NM_001013706 NM_001042413 NM_152629 NT_011109	1	CTCCTTGCATAACATTTTTCCTTGAACACACTGGGCCTCCAACGCCACCG
PTPRN	HS.582014	ILMN_1871756	33		final_53									nm_006310	Hs.582014	NM_006310 XM_001129120 XM_001725426 NM_207361 NM_020987 NM_020405 XM_001719349 NT_016297	1	CATTAGAAAGGATCTGACGGTCTTCTCCCATGGCACCAGCTGCACAGTTC
PTPRN	LOC653464	ILMN_1880277	33	SRGAP2P1	final_53									SRGAP2	ENSG00000163486	NM_001875 NT_077389 NT_037852 NT_034401 NT_010393 NT_034508 NT_078055 NT_033968 NT_113952 NT_023629 NT_011519 NT_024133 NT_113816 NT_007758 NT_078071 NT_078070	1	GGACCAAATTAAGAATGGTATGAAAGCCTGTTTGTGACGCTTATGTTTGG
PTPRN	HS.577763	ILMN_1916840	33		final_53									NM_175723	Hs.577763	NM_002942 NR_003238 NM_175723 NM_021015 NT_029419	1	CCCCAGGGCCTCAGGAAAAGTAAATCCCTCTGGACTCTGCGCTCCCTCCA
PTPRN	HIF3A	ILMN_2265623	33		final_53									64344	EG:64344	NM_152794	1
SPCS1	RNF181	ILMN_1655340	33		final_1									51255	EG:51255	NM_016494 NM_014041	-1
SPCS1	SPOCK2	ILMN_1656287	33		final_1									9806	EG:9806	NM_014767	1
SPCS1	NRIP2	ILMN_1664607	33		final_1									83714	EG:83714	NM_031474	-1
SPCS1	CDC42	ILMN_1675156	33		final_1	o		2						998	NM_044472	NM_044472	-1
SPCS1	SPAG7	ILMN_1684446	33		final_1									9552	EG:9552	NM_004890	-1
SPCS1	LOC650751	ILMN_1689324	33		final_1									XM_939833	EG:650751	XM_939833	1
SPCS1	ANKRD11	ILMN_1690465	33		final_1									29123	NM_013275	NM_013275	1
SPCS1	LOC650761	ILMN_1694127	33	similar to T-cell receptor alpha chain V region CTL-L17 precursor	final_1									650761	XM_939844	XM_939844	1
SPCS1	KLHL8	ILMN_1714083	33		final_1									57563	EG:57563	NM_020803	-1
SPCS1	TFCP2	ILMN_1738750	33		final_1									7024	EG:7024	NM_005653	1
SPCS1	USP34	ILMN_1739454	33		final_1									9736	EG:9736	NM_014709	1
SPCS1	BAT2D1	ILMN_1743137	33		final_1									23215	EG:23215	NM_015172	1
SPCS1	HNRPM	ILMN_1745385	33		final_1									4670	EG:4670	NM_031203	1
SPCS1	RBL2	ILMN_1756999	33		final_1									5934	EG:5934	NM_005611	1
SPCS1	PAX7	ILMN_1761061	33		final_1									5081	EG:5081	NM_002584	-1
SPCS1	ALDH9A1	ILMN_1761804	33		final_1									223	EG:223	NM_000696	1
SPCS1	LOC728411	ILMN_1770498	33		final_1									POM121	XM_931940	XM_931940	1
SPCS1	MAPRE1	ILMN_1777721	33		final_1									22919	EG:22919	NM_012325	1
SPCS1	COX6A1	ILMN_1783636	33		final_1									1337	EG:1337	NM_004373	-1
SPCS1	CDKAL1	ILMN_1788022	33		final_1									54901	EG:54901	NM_017774	1
SPCS1	CATSPER1	ILMN_1789394	33		final_1									117144	EG:117144	NM_053054	-1
SPCS1	ARPC2	ILMN_1792489	33		final_1									10109	EG:10109	NM_005731	-1
SPCS1	JAK1	ILMN_1793384	33		final_1									3716	EG:3716	NM_002227	1
SPCS1	SIN3A	ILMN_1805996	33		final_1									25942	EG:25942	NM_015477	1
SPCS1	GSTO1	ILMN_1808196	33	connects 2 stars	final_1									9446	EG:9446	NM_004832	-1
SPCS1	HS.546375	ILMN_1873034	33		final_1										Hs.546375	NT_026437	1
SPCS1	HS.558212	ILMN_1882000	33		final_1										Hs.558212	NT_011757	1
SPCS1	HS.142570	ILMN_1898022	33		final_1										Hs.142570	NT_022517	1
SPCS1	HS.534439	ILMN_1916256	33		final_1										Hs.534439	NT_026437	1
SPCS1	ETS1	ILMN_2122103	33		final_1									2113	EG:2113	NM_005238	1
SPCS1	ZFP36L2	ILMN_2150258	33		final_1									678	EG:678	NM_006887	1
SPCS1	BLOC1S1	ILMN_2157510	33		final_1									2647	EG:2647	NM_001487	-1
SPCS1	SCAMP3	ILMN_2399208	33		final_1									10067	EG:10067	NM_005698	1
RP1L1	GNB2	ILMN_1658928	32		final_40									2783	EG:2783	NM_005273	1
RP1L1	FLOT1	ILMN_1661439	32		final_40									10211	NM_005803	NM_005803	1
RP1L1	OMA1	ILMN_1670079	32		final_40									115209	EG:115209	NM_145243	-1
RP1L1	DPP9	ILMN_1673069	32		final_40									91039	NM_139159	NM_139159	1
RP1L1	ME2	ILMN_1675186	32		final_40									4200	EG:4200	NM_002396	-1
RP1L1	ARFGAP1	ILMN_1675709	32		final_40									55738	EG:55738	NM_175609	1
RP1L1	MITD1	ILMN_1677133	32		final_40									129531	EG:129531	NM_138798	-1
RP1L1	C14ORF135	ILMN_1680781	32		final_40									64430	EG:64430	NM_022495	-1
RP1L1	SMC4	ILMN_1683302	32		final_40									10051	EG:10051	NM_005496	-1
RP1L1	PRRC1	ILMN_1685140	32		final_40									133619	EG:133619	NM_130809	-1
RP1L1	NOL11	ILMN_1688971	32		final_40									25926	EG:25926	NM_015462	-1
RP1L1	COPB1	ILMN_1699112	32		final_40									1315	EG:1315	NM_016451	-1
RP1L1	PPP1CC	ILMN_1701855	32		final_40									5501	EG:5501	NM_002710	-1
RP1L1	DLAT	ILMN_1706583	32		final_40									1737	EG:1737	NM_001931	-1
RP1L1	CHMP1A	ILMN_1709439	32		final_40									5119	EG:5119	NM_002768	1
RP1L1	ENOPH1	ILMN_1711878	32		final_40									58478	EG:58478	NM_021204	-1
RP1L1	LOC124446	ILMN_1737644	32		final_40									124446	EG:124446	NM_194280	1
RP1L1	ABI1	ILMN_1739081	32		final_40	o	-2		-2					10006	EG:10006	NM_005470	-1
RP1L1	WDR33	ILMN_1745852	32		final_40									55339	EG:55339	NM_001006623	-1
RP1L1	GABPA	ILMN_1750029	32		final_40									2551	EG:2551	NM_002040	-1
RP1L1	DMTF1	ILMN_1750075	32		final_40									9988	EG:9988	NM_021145	-1
RP1L1	TOLLIP	ILMN_1765523	32		final_40									54472	EG:54472	NM_019009	1
RP1L1	PCMTD2	ILMN_1767848	32		final_40									55251	EG:55251	NM_018257	-1
RP1L1	C14ORF32	ILMN_1779279	32		final_40									93487	EG:93487	NM_144578	-1
RP1L1	GMIP	ILMN_1805693	32		final_40									51291	EG:51291	NM_016573	1
RP1L1	FBXO28	ILMN_2045911	32		final_40									23219	EG:23219	NM_015176	-1
RP1L1	AGGF1	ILMN_2064917	32		final_40									55109	EG:55109	NM_018046	-1
RP1L1	XKR8	ILMN_2087303	32		final_40									55113	EG:55113	NM_018053	1
RP1L1	FLJ45445	ILMN_2131022	32		final_40									399844	NM_001004321	NM_001004321	1
RP1L1	NUDT21	ILMN_2133146	32		final_40									11051	EG:11051	NM_007006	-1
RP1L1	C19ORF29	ILMN_2350421	32		final_40									58509	EG:58509	NM_001080543	1
RP1L1	SEPT-2	ILMN_2365711	32		final_40									4735	EG:4735	NM_004404	-1
JMJD3	PPT2	ILMN_1660337	30		final_19									XM_930589	XM_930589	XM_930589	1
JMJD3	CCR10	ILMN_1666493	30		final_19									2826	EG:2826	NM_016602	1
JMJD3	ZNF577	ILMN_1667322	30		final_19									84765	EG:84765	NM_032679	1
JMJD3	CAPN1	ILMN_1705261	30		final_19									823	EG:823	NM_005186	-1
JMJD3	SYT11	ILMN_1717934	30		final_19									23208	EG:23208	NM_152280	-1
JMJD3	LOC643011	ILMN_1719072	30		final_19									XM_931238.1	EG:643011	XM_931238	1
JMJD3	SNAPC1	ILMN_1725346	30		final_19									6617	EG:6617	NM_003082	1
JMJD3	ZNF763	ILMN_1727183	30		final_19									284390	NM_001012753	NM_001012753	1
JMJD3	IL17RD	ILMN_1728663	30		final_19									54756	EG:54756	NM_017563	1
JMJD3	FLJ40722	ILMN_1740818	30		final_19									285966	XM_945696	XM_945696	1
JMJD3	RBM4B	ILMN_1743104	30		final_19									83759	EG:83759	NM_031492	-1
JMJD3	LOC654191	ILMN_1762308	30		final_19									XM_940642	XM_940642	XM_940642	-1
JMJD3	UBXD4	ILMN_1776038	30		final_19									165324	EG:165324	NM_181713	1
JMJD3	TTLL11	ILMN_1784356	30		final_19									158135	EG:158135	NM_194252	1
JMJD3	FASN	ILMN_1784871	30		final_19									2194	EG:2194	NM_004104	-1
JMJD3	HEATR1	ILMN_1787762	30		final_19									55127	EG:55127	NM_018072	-1
JMJD3	DOCK2	ILMN_1799725	30		final_19									1794	EG:1794	NM_004946	-1
JMJD3	HS.562161	ILMN_1823630	30		final_19									NM_003722	Hs.562161	NM_003722 NT_086602 NT_113874 NT_086586 NT_079485	1	CTACAATGATGGACAGATTGCCCCTCCCTGACCCTTGTTGGACACACAGC
JMJD3	HS.580825	ILMN_1845894	30		final_19									NM_002158	Hs.580825	NM_002158 NM_003028 NM_001007467 NM_014775 NM_001722 NT_011362	1	TGTGCTGCTGCCTGCTGGTTCTGGGAATGGGTGAGCCTTGGGAGAGCAAA
JMJD3	HS.82028	ILMN_1914515	30		final_19									TGFBR2	ENSG00000163513	NM_002661 NM_014634 NT_022517	1	CCTGAGAGCATGAGGGCCCCTAGACAGAGTACAAGGTGTAATTCAGACAG
JMJD3	RHBDL2	ILMN_2053536	30		final_19									54933	EG:54933	NM_017821	1
JMJD3	TMEM156	ILMN_2095660	30		final_19									80008	EG:80008	NM_024943	1
JMJD3	BMP8B	ILMN_2123415	30		final_19									656	EG:656	NM_001720	1
JMJD3	SSTR2	ILMN_2152257	30		final_19									6752	EG:6752	NM_001050	1
JMJD3	MRP63	ILMN_2203807	30		final_19									78988	EG:78988	NM_024026	1
JMJD3	ATG10	ILMN_2206098	30		final_19									83734	EG:83734	NM_031482	1
JMJD3	C11ORF63	ILMN_2268593	30		final_19									79864	EG:79864	NM_024806	1
JMJD3	FUT6	ILMN_2312228	30		final_19									2528	EG:2528	NM_000150	1
JMJD3	FRMD6	ILMN_2330787	30		final_19									122786	EG:122786	NM_152330	1
JMJD3	RASSF6	ILMN_2352245	30		final_19									166824	EG:166824	NM_177532	1
ASPM	YTHDF3	ILMN_1657470	29		final_12									253943	EG:253943	NM_152758	1
ASPM	NOL6	ILMN_1665442	29		final_12									65083	EG:65083	NM_022917	-1
ASPM	SPCS3	ILMN_1667707	29		final_12									60559	EG:60559	NM_021928	1
ASPM	ARMC10	ILMN_1689296	29		final_12									83787	EG:83787	NM_031905	1
ASPM	FLYWCH1	ILMN_1690035	29		final_12									84256	EG:84256	NM_032296	-1
ASPM	VAMP7	ILMN_1690524	29		final_12									6845	EG:6845	NM_005638	1
ASPM	OGFRL1	ILMN_1715809	29		final_12									79627	EG:79627	NM_024576	1
ASPM	RABEP1	ILMN_1719622	29		final_12									9135	EG:9135	NM_004703	1
ASPM	MRPL38	ILMN_1719656	29		final_12									64978	EG:64978	NM_032478	-1
ASPM	CCDC95	ILMN_1724406	29		final_12									283899	EG:283899	NM_173618	-1
ASPM	FBXL5	ILMN_1735051	29		final_12									26234	EG:26234	NM_033535	1
ASPM	BCL9L	ILMN_1743966	29		final_12									283149	EG:283149	NM_182557	-1
ASPM	RLTPR	ILMN_1746138	29		final_12									146206	EG:146206	NM_001013838	-1
ASPM	SELT	ILMN_1746368	29		final_12									51714	EG:51714	NM_016275	1
ASPM	GHDC	ILMN_1746378	29		final_12									84514	EG:84514	NM_032484	-1
ASPM	SSR1	ILMN_1750693	29		final_12									6745	EG:6745	NM_003144	1
ASPM	SLC25A24	ILMN_1752639	29		final_12									29957	EG:29957	NM_013386	1
ASPM	HIST1H2BF	ILMN_1779373	29		final_12									8343	NM_003522	NM_003522	1
ASPM	FIZ1	ILMN_1781803	29		final_12									84922	EG:84922	NM_032836	-1
ASPM	AMD1	ILMN_1788462	29		final_12									262	EG:262	NM_001033059	1
ASPM	HIST1H2AC	ILMN_1792689	29		final_12									8334	EG:8334	NM_003512	1
ASPM	C1ORF119	ILMN_1795893	29		final_12									56900	NM_020141	NM_020141	1
ASPM	CRY2	ILMN_1796180	29		final_12									1408	EG:1408	NM_021117	-1
ASPM	SYMPK	ILMN_1802089	29		final_12									8189	EG:8189	NM_004819	-1
ASPM	EEF1A1	ILMN_2038774	29		final_12									1915	EG:1915	NM_001402	1
ASPM	CD302	ILMN_2070940	29		final_12									9936	EG:9936	NM_014880	1
ASPM	ARRDC3	ILMN_2198516	29		final_12									57561	EG:57561	NM_020801	1
ASPM	WTAP	ILMN_2260725	29		final_12									9589	EG:9589	NM_152857	1
ASPM	UBE2D3	ILMN_2320853	29		final_12									7323	EG:7323	NM_181890	1
LOC643121	HBS1L	ILMN_1659495	29		final_1									10767	EG:10767	NM_006620	-1
LOC643121	USP39	ILMN_1659523	29		final_1									10713	EG:10713	NM_006590	1
LOC643121	LOC653238	ILMN_1662772	29		final_1									XM_932384.1	XM_932384	XM_932384	1
LOC643121	WSB1	ILMN_1664802	29		final_1									26118	EG:26118	NM_134264	-1
LOC643121	DUSP6	ILMN_1677466	29		final_1									1848	EG:1848	NM_001946	-1
LOC643121	LOC643505	ILMN_1681728	29		final_1									XM_926824.1	XM_926824	XM_926824	1
LOC643121	PRKAR2B	ILMN_1684850	29		final_1									5577	EG:5577	NM_002736	-1
LOC643121	TNNI1	ILMN_1690050	29		final_1									7135	EG:7135	NM_003281	-1
LOC643121	CCM2	ILMN_1692271	29		final_1									83605	EG:83605	NM_031443	1
LOC643121	SCAF1	ILMN_1694194	29		final_1									58506	EG:58506	NM_021228	-1
LOC643121	TINF2	ILMN_1697420	29		final_1									26277	EG:26277	NM_012461	1
LOC643121	KPNB1	ILMN_1703949	29		final_1									3837	EG:3837	NM_002265	-1
LOC643121	HDHD1A	ILMN_1710136	29		final_1									8226	EG:8226	NM_012080	1
LOC643121	SPHK2	ILMN_1729281	29		final_1									56848	EG:56848	NM_020126	1
LOC643121	SERPINB9	ILMN_1742052	29		final_1									5272	EG:5272	NM_004155	1
LOC643121	MAPK13	ILMN_1749327	29		final_1									5603	EG:5603	NM_002754	1
LOC643121	DPP7	ILMN_1756723	29		final_1									29952	EG:29952	NM_013379	1
LOC643121	LOC645676	ILMN_1761266	29		final_1									XM_930505.1	EG:645676	XM_930505	-1
LOC643121	ZNF385C	ILMN_1770400	29		final_1									201181	EG:201181	NM_001013624	-1
LOC643121	PIK3CG	ILMN_1770433	29		final_1									5294	EG:5294	NM_002649	-1
LOC643121	MAN1B1	ILMN_1771957	29		final_1									11253	EG:11253	NM_016219	1
LOC643121	FXN	ILMN_1774826	29		final_1									2395	EG:2395	NM_000144	1
LOC643121	C8ORF55	ILMN_1777740	29		final_1									51337	EG:51337	NM_016647	1
LOC643121	NOM1	ILMN_1778316	29		final_1									64434	EG:64434	NM_138400	-1
LOC643121	C9ORF114	ILMN_1803317	29		final_1									51490	EG:51490	NM_016390	1
LOC643121	ZKSCAN4	ILMN_1804571	29		final_1									387032	EG:387032	NM_019110	1
LOC643121	HS.564598	ILMN_1847314	29		final_1									BQ028095	Hs.564598	NT_24524	-1
LOC643121	HS.116870	ILMN_1894279	29		final_1									Hs_116870	Hs.116870	NT_008705	1
LOC643121	WIPF1	ILMN_2262957	29		final_1									7456	EG:7456	NM_001077269	-1
KRTAP19-6	ZNF254	ILMN_1657729	27		final_1									399655	NM_203282	NM_203282	1
KRTAP19-6	LOC389787	ILMN_1665823	27		final_1									389787	XM_497072	XM_497072	1
KRTAP19-6	SKIV2L	ILMN_1666512	27		final_1									6499	NM_006929	NM_006929	-1
KRTAP19-6	ALCAM	ILMN_1670870	27		final_1									214	EG:214	NM_001627	1
KRTAP19-6	TMEM14B	ILMN_1685258	27		final_1									81853	NM_030969	NM_030969	1
KRTAP19-6	LOC402644	ILMN_1686811	27		final_1									402644	EG:402644	XM_938297	1
KRTAP19-6	OSBPL11	ILMN_1687410	27		final_1									114885	EG:114885	NM_022776	1
KRTAP19-6	HNRPC	ILMN_1695588	27		final_1									3183	NM_031314	NM_031314	1
KRTAP19-6	C14ORF166	ILMN_1696708	27		final_1									51637	EG:51637	NM_016039	1
KRTAP19-6	NAP1L1	ILMN_1699208	27		final_1									4673	EG:4673	NM_139207	1
KRTAP19-6	N4BP1	ILMN_1706225	27		final_1									9683	EG:9683	NM_153029	-1
KRTAP19-6	NSD1	ILMN_1707175	27		final_1									64324	EG:64324	NM_022455	-1
KRTAP19-6	PFKL	ILMN_1713037	27		final_1									5211	EG:5211	NM_002626	-1
KRTAP19-6	ATG5	ILMN_1718265	27		final_1									9474	EG:9474	NM_004849	1
KRTAP19-6	EEF1E1	ILMN_1725105	27		final_1									9521	EG:9521	NM_004280	1
KRTAP19-6	ZNF532	ILMN_1731358	27		final_1									55205	EG:55205	NM_018181	1
KRTAP19-6	NARS	ILMN_1732216	27		final_1									4677	EG:4677	NM_004539	1
KRTAP19-6	LOC284988	ILMN_1733453	27		final_1									284988	XM_209429	XM_209429	1
KRTAP19-6	LOC647673	ILMN_1757702	27		final_1									647673	XM_936731	XM_936731	1
KRTAP19-6	ANAPC10	ILMN_1770378	27		final_1									10393	EG:10393	NM_014885	1
KRTAP19-6	RNPC3	ILMN_1783026	27		final_1									55599	NM_017619	NM_017619	1
KRTAP19-6	HS.184721	ILMN_1855278	27		final_1										Hs.184721	nt_007933	-1	CGGCTGACGAGCTACCTTACTGAGCATATTCCTGCCTCTACACCAGAGAC
KRTAP19-6	CCNH	ILMN_2187830	27		final_1									902	EG:902	NM_001239	1
KRTAP19-6	CCDC91	ILMN_2190051	27		final_1									55297	EG:55297	NM_018318	1
KRTAP19-6	C18ORF32	ILMN_2196588	27		final_1									497661	EG:497661	NM_001035005	1
KRTAP19-6	UBLCP1	ILMN_2202481	27		final_1									134510	EG:134510	NM_145049	1
KRTAP19-6	COPS8	ILMN_2373779	27		final_1									10920	EG:10920	NM_006710	1
HS.571125	AK2	ILMN_1655645	26		final_1									204	EG:204	NM_013411	-1
HS.571125	GPER	ILMN_1665435	26		final_1									2852	EG:2852	NM_001505	-1
HS.571125	PSMB6	ILMN_1666409	26		final_1									5694	EG:5694	NM_002798	-1
HS.571125	UBE2E2	ILMN_1707475	26		final_1									7325	EG:7325	NM_152653	-1
HS.571125	TMEM63A	ILMN_1719649	26		final_1									9725	EG:9725	NM_014698	1
HS.571125	HACL1	ILMN_1723414	26		final_1									26061	EG:26061	NM_012260	-1
HS.571125	RBBP8	ILMN_1739101	26		final_1									5932	EG:5932	NM_002894	-1
HS.571125	ARHGAP11A	ILMN_1744830	26		final_1									9824	EG:9824	NM_014783	-1
HS.571125	MRPL21	ILMN_1744835	26		final_1									219927	EG:219927	NM_181513	-1
HS.571125	ATL3	ILMN_1751086	26		final_1									25923	EG:25923	NM_015459	-1
HS.571125	MRPL27	ILMN_1753976	26		final_1	o		2						51264	EG:51264	NM_148570	-1
HS.571125	NDUFA8	ILMN_1759729	26		final_1									4702	EG:4702	NM_014222	-1
HS.571125	BATF3	ILMN_1763207	26		final_1									55509	EG:55509	NM_018664	-1
HS.571125	ASGR1	ILMN_1769013	26		final_1									432	EG:432	NM_001671	-1
HS.571125	ATP5I	ILMN_1772506	26		final_1	o	2		2					521	EG:521	NM_007100	-1
HS.571125	CD86	ILMN_1782560	26	connects 2 stars	final_1									942	EG:942	NM_175862	-1
HS.571125	C22ORF28	ILMN_1795991	26		final_1									51493	EG:51493	NM_014306	-1
HS.571125	MRPL55	ILMN_1799289	26		final_1									128308	EG:128308	NM_181462	-1
HS.571125	MRPL36	ILMN_1800197	26		final_1									64979	EG:64979	NM_032479	-1
HS.571125	LY86	ILMN_1807825	26		final_1									9450	EG:9450	NM_004271	-1
HS.571125	TRMT1	ILMN_1812940	26		final_1									55621	EG:55621	NM_017722	-1
HS.571125	HCG9	ILMN_1814611	26		final_1									10255	NM_005844	NM_005844	1
HS.571125	NDUFV2	ILMN_2086417	26		final_1									4729	EG:4729	NM_021074	-1
HS.571125	KCTD3	ILMN_2134555	26		final_1									51133	EG:51133	NM_016121	-1
HS.571125	MGST1	ILMN_2355168	26		final_1									4257	EG:4257	NM_145792	-1
HS.571125	AKR1A1	ILMN_2380771	26		final_1									10327	EG:10327	NM_153326	-1
KIAA0323	OR10Q1	ILMN_1653073	26		final_6									219960	EG:219960	NM_001004471	1
KIAA0323	LOC643665	ILMN_1664118	26		final_6									XM_931729.1	EG:643665	XM_931729	1
KIAA0323	LOC642365	ILMN_1667650	26		final_6									XM_925893.1	EG:642365	XM_925893	1
KIAA0323	LOC652839	ILMN_1674364	26		final_6									XM_942534	EG:652839	XM_942534	1
KIAA0323	APOBEC3C	ILMN_1675684	26		final_6									27350	EG:27350	NM_014508	1
KIAA0323	KRT3	ILMN_1695621	26		final_6									3850	EG:3850	NM_057088	1
KIAA0323	LOC651763	ILMN_1702321	26		final_6									XM_940981	XM_940981	XM_940981	1
KIAA0323	CRAT	ILMN_1705767	26		final_6									1384	EG:1384	NM_004003	1
KIAA0323	FBXO16	ILMN_1715823	26		final_6									157574	EG:157574	NM_172366	1
KIAA0323	C1QL1	ILMN_1716957	26		final_6									10882	EG:10882	NM_006688	1
KIAA0323	PRPH	ILMN_1723678	26		final_6									5630	EG:5630	NM_006262	1
KIAA0323	OR51S1	ILMN_1726969	26		final_6									119692	EG:119692	NM_001004758	1
KIAA0323	TYW1	ILMN_1736135	26		final_6									55253	EG:55253	NM_018264	1
KIAA0323	FXR2	ILMN_1738699	26		final_6									9513	EG:9513	NM_004860	1
KIAA0323	LOC646447	ILMN_1739201	26		final_6									646447	XM_929374	XM_929374	1
KIAA0323	NKX1-2	ILMN_1742725	26		final_6									390010	XM_372331	XM_372331	1
KIAA0323	XPNPEP2	ILMN_1743357	26		final_6									7512	EG:7512	NM_003399	1
KIAA0323	GTF2F1	ILMN_1748616	26		final_6									2962	EG:2962	NM_002096	1
KIAA0323	ZFP42	ILMN_1751127	26		final_6									132625	EG:132625	NM_174900	1
KIAA0323	TMEM102	ILMN_1755224	26		final_6									284114	EG:284114	NM_178518	1
KIAA0323	FLJ37396	ILMN_1771618	26		final_6									285754	NM_173671	NM_173671	1
KIAA0323	LOC728229	ILMN_1785919	26		final_6									84222	XM_943555	XM_943555	1
KIAA0323	KLHL26	ILMN_1805330	26		final_6									55295	EG:55295	NM_018316	1
KIAA0323	HS.550356	ILMN_1853012	26		final_6									AA861198	Hs.550356	NT_025028	1	CTCTGCTTCCCAAACTAGGCTTCCCATAATCTTGGGATCTACAATGCTGC
KIAA0323	HS.213722	ILMN_1888047	26		final_6									AI911173	Hs.213722	NT_016354	1	CCCTGGCTGCAAAGCTCCCAGATTGCAGAGCAACAAACAGTGCGGTGATT
KIAA0323	HS.576072	ILMN_1916457	26		final_6									0	Hs.576072	NT_032977 NT_030059 NT_008470 NT_010718 NT_033927	1	TCACGCATGGTGGCTCCATTGCACTCCAGCCCAGGCGACAGTAGGAGACT
HS.443993	ZNF282	ILMN_1668185	25		final_1									8427	NM_003575	NM_003575	-1
HS.443993	USP5	ILMN_1671494	25	connects 2 stars	final_1									8078	EG:8078	NM_003481	1
HS.443993	ANKZF1	ILMN_1677487	25		final_1									55139	EG:55139	NM_018089	-1
HS.443993	MRPL49	ILMN_1681324	25		final_1									740	EG:740	NM_004927	-1
HS.443993	INSIG1	ILMN_1686989	25		final_1									3638	EG:3638	NM_198336	1
HS.443993	DHX8	ILMN_1687419	25		final_1									1659	EG:1659	NM_004941	-1
HS.443993	DDX24	ILMN_1700628	25		final_1									57062	EG:57062	NM_020414	-1
HS.443993	COX7A2	ILMN_1701293	25		final_1									1347	EG:1347	NM_001865	1
HS.443993	SETD1A	ILMN_1714327	25		final_1									9739	EG:9739	NM_014712	-1
HS.443993	KIAA1804	ILMN_1719876	25		final_1									84451	EG:84451	NM_032435	1
HS.443993	NMD3	ILMN_1727348	25		final_1									51068	EG:51068	NM_015938	1
HS.443993	COBRA1	ILMN_1732210	25		final_1									25920	EG:25920	XM_939381	-1
HS.443993	ATN1	ILMN_1737833	25		final_1									1822	EG:1822	NM_001007026	-1
HS.443993	POLRMT	ILMN_1770356	25		final_1									5442	EG:5442	NM_005035	-1
HS.443993	AKNA	ILMN_1770673	25		final_1									80709	EG:80709	NM_030767	-1
HS.443993	FYN	ILMN_1781207	25		final_1									2534	EG:2534	NM_153047	-1
HS.443993	CLECL1	ILMN_1782729	25		final_1									160365	EG:160365	NM_172004	1
HS.443993	STK17B	ILMN_1798543	25		final_1									9262	EG:9262	NM_004226	1
HS.443993	ZNF609	ILMN_1799082	25		final_1									23060	EG:23060	NM_015042	-1
HS.443993	HS.563042	ILMN_1819251	25		final_1									NM_001876 NM_000889	Hs.563042	NM_001876 NM_000889 XR_039620 XR_042491 XM_001726191 XR_042310 NM_001407 NM_014228 NT_011512	1	ATTGGATGAGCTTTTGTGCTTCCCAGCAGCTCCAGGTCTTGTCCCTGGCC
HS.443993	C1ORF86	ILMN_2097790	25		final_1									199990	EG:199990	NM_182533	-1
HS.443993	DPM1	ILMN_2105308	25		final_1									8813	EG:8813	NM_003859	1
HS.443993	SUCLA2	ILMN_2150019	25		final_1									8803	NM_003850	NM_003850	1
HS.443993	ATG16L1	ILMN_2365881	25		final_1									55054	EG:55054	NM_017974	-1
HS.443993	CLEC4A	ILMN_2399363	25		final_1									50856	EG:50856	NM_194448	1
FAM91A1	MBNL2	ILMN_1658015	24		final_2									10150	EG:10150	NM_144778	1
FAM91A1	CENPQ	ILMN_1670769	24		final_2									55166	EG:55166	NM_018132	1
FAM91A1	ZBTB33	ILMN_1673138	24		final_2									10009	EG:10009	NM_006777	1
FAM91A1	CGRRF1	ILMN_1681008	24		final_2									10668	EG:10668	NM_006568	1
FAM91A1	SLC38A6	ILMN_1696622	24		final_2									145389	EG:145389	NM_153811	1
FAM91A1	USP1	ILMN_1696975	24		final_2									7398	EG:7398	NM_003368	1
FAM91A1	ELOVL6	ILMN_1700546	24		final_2									79071	EG:79071	NM_024090	1
FAM91A1	KPNA3	ILMN_1708427	24		final_2									3839	EG:3839	NM_002267	1
FAM91A1	KCND3	ILMN_1727438	24		final_2									3752	EG:3752	NM_172198	-1
FAM91A1	FBXO4	ILMN_1755811	24		final_2									26272	EG:26272	NM_012176	1
FAM91A1	RAD1	ILMN_1763765	24		final_2									5810	EG:5810	NM_133377	1
FAM91A1	ST13	ILMN_1765204	24		final_2									6767	NM_003932	NM_003932	1
FAM91A1	BMPR2	ILMN_1789095	24		final_2									659	EG:659	NM_001204	1
FAM91A1	HS.171171	ILMN_1832879	24		final_2									nm_212472	Hs.171171	NM_212472 NM_212471 NM_016454 NM_002734 NT_011520	-1	CATGCACGTCCCAGCGTGAGTGCCTGAATGGGTCTCTCAGGTCTGAACAG
FAM91A1	HS.125056	ILMN_1862521	24		final_2									NM_001115	Hs.125056	NM_001115 XM_001713841 NT_004487 NT_016354	1	CCCTGAGCTTTTTGCTCGTCTTGGTAGCAGATATCTGTAAAAACCTACCC
FAM91A1	TPT1	ILMN_2094718	24		final_2									7178	EG:7178	NM_003295	1
FAM91A1	CMPK1	ILMN_2104877	24		final_2									51727	EG:51727	NM_016308	1
FAM91A1	KIF11	ILMN_2143155	24		final_2	o					2			3832	EG:3832	NM_004523	1
FAM91A1	NDUFAB1	ILMN_2179018	24		final_2									4706	EG:4706	NM_005003	1
FAM91A1	NOC3L	ILMN_2187727	24		final_2									64318	EG:64318	NM_022451	1
FAM91A1	EED	ILMN_2347917	24		final_2									8726	EG:8726	NM_003797	1
FAM91A1	SS18	ILMN_2359096	24		final_2									6760	EG:6760	NM_005637	1
FAM91A1	PPP1CB	ILMN_2405023	24		final_2									5500	EG:5500	NM_206876	1
FAM91A1	FAM111A	ILMN_2410038	24		final_2									63901	EG:63901	NM_022074	1
HS.119225	FAM116B	ILMN_1659029	24		final_19									414918	EG:414918	NM_001001794	1
HS.119225	TGM2	ILMN_1679267	24		final_19	o		-2						7052	EG:7052	NM_198951	1
HS.119225	CT45-1	ILMN_1679921	24		final_19									441519	EG:541466	NM_001017417	1
HS.119225	LOC645212	ILMN_1689749	24		final_19									XM_939117	XM_939117	XM_939117	-1
HS.119225	MLL3	ILMN_1698472	24		final_19									58508	NM_170606	NM_170606	-1
HS.119225	TTC25	ILMN_1710303	24		final_19	o		-2						83538	EG:83538	NM_031421	1
HS.119225	KRTAP4-7	ILMN_1718202	24		final_19									85287	NM_033061	NM_033061	1
HS.119225	DARC	ILMN_1723684	24		final_19									2532	EG:2532	NM_002036	1
HS.119225	LOC653125	ILMN_1732291	24		final_19									XM_931236.1	XM_931236	XM_931236	-1
HS.119225	USP35	ILMN_1739384	24		final_19									57558	EG:57558	XM_942438	-1
HS.119225	EPHA8	ILMN_1756989	24		final_19									2046	EG:2046	NM_020526	1
HS.119225	DOCK9	ILMN_1773413	24		final_19									23348	EG:23348	NM_015296	-1
HS.119225	STK33	ILMN_1778213	24		final_19									65975	EG:65975	NM_030906	1
HS.119225	BLVRB	ILMN_1797793	24		final_19									645	EG:645	NM_000713	1
HS.119225	TNS1	ILMN_1807919	24		final_19									7145	EG:7145	NM_022648	1
HS.119225	TCEB3	ILMN_1808110	24		final_19									6924	EG:6924	NM_003198	1
HS.119225	EPB42	ILMN_1814397	24		final_19									2038	EG:2038	NM_000119	1
HS.119225	HBD	ILMN_1815527	24		final_19									3045	EG:3045	NM_000519	1
HS.119225	HS.552354	ILMN_1892599	24		final_19									AW080790	Hs.552354	NT_029419	1	GGGCTCCTTCCCTCTGAAGGTATGTTTGCGGGGAATCCAAAATTCATGGG
HS.119225	HS.561747	ILMN_1894072	24		final_19	o			-2					BU935198	Hs.561747	NM_032211 NM_006066 NM_153326 NM_017749 NT_007933	-1	CAGATGTTGTAGACCTAGCCCCACAGGACTGCATTTAGCTGCTTCAGTGA
HS.119225	OR11A1	ILMN_2101339	24		final_19									26531	NM_013937	NM_013937	1
HS.119225	ZNF509	ILMN_2103388	24		final_19									166793	EG:166793	NM_145291	-1
HS.119225	TULP4	ILMN_2337740	24		final_19									56995	EG:56995	NM_020245	-1
HS.119225	ELAVL3	ILMN_2401143	24		final_19									1995	EG:1995	NM_001420	1
HS.541221	DKFZP434K191	ILMN_1652533	24		final_47									29797	NM_001029950	NM_001029950	1
HS.541221	FLJ45256	ILMN_1665778	24		final_47									400511	NM_207448	NM_207448	1
HS.541221	LOC644950	ILMN_1675830	24		final_47									XM_928034.1	XM_928034	XM_928034	1
HS.541221	ZNF773	ILMN_1685365	24		final_47									374928	EG:374928	NM_198542	1
HS.541221	PTPLAD2	ILMN_1690114	24		final_47									401494	EG:401494	NM_001010915	1
HS.541221	ICA1	ILMN_1694399	24		final_47									3382	EG:3382	NM_022308	1
HS.541221	CNGB1	ILMN_1702383	24		final_47									1258	EG:1258	NM_001297	1
HS.541221	CEP27	ILMN_1738482	24		final_47									55142	EG:55142	NM_018097	1
HS.541221	C9ORF130	ILMN_1738678	24		final_47									286354	XM_939697	XM_939697	1
HS.541221	SCRT1	ILMN_1741617	24		final_47									XM_926358	XM_926358	XM_926358	1
HS.541221	EVI5	ILMN_1746314	24		final_47									7813	EG:7813	NM_005665	1
HS.541221	LOC643882	ILMN_1746919	24		final_47									XM_931879.1	XM_931879	XM_931879	1
HS.541221	IRF2BP1	ILMN_1751171	24		final_47									26145	EG:26145	NM_015649	1
HS.541221	ALS2CR14	ILMN_1787314	24		final_47									65068	NM_178231	NM_178231	1
HS.541221	LOC644642	ILMN_1812250	24		final_47									XM_932279.1	XM_932279	XM_932279	1
HS.541221	ZNF223	ILMN_1815578	24		final_47									7766	EG:7766	NM_013361	1
HS.541221	HS.561497	ILMN_1837295	24		final_47									BX110145	Hs.561497	NT_025741	1	GAGGCAGATTTGAGAGATATTGCCCATCCTCCCCACTCAGCGGCCCTGCA
HS.541221	HS.86941	ILMN_1906682	24		final_47									HCN4	ENSG00000138622	XM_001727023 XM_001719750 XM_001720564 XR_037554 XM_001125792 XM_926013 XM_001125922 XM_001726968 XM_001726969 NM_001013655 XM_001721149 XM_001127817 XM_927710 XM_001129116 XM_001722773 XM_001723208 XM_001722813 NT_010194	1	CCTTCACCCCTGCTGCCTCCAGGACAAGACTGTGGGTTTGGATCAAGTCC
HS.541221	PCDHB9	ILMN_2047885	24		final_47									56127	NM_019119	NM_019119	1
HS.541221	ZADH1	ILMN_2105253	24		final_47									145482	EG:145482	NM_152444	1
HS.541221	C4ORF34	ILMN_2224907	24		final_47									201895	EG:201895	NM_174921	1
HS.541221	NME2	ILMN_2234873	24		final_47									4831	NM_001018138	NM_001018138	1
HS.541221	RAD51	ILMN_2257432	24		final_47									5888	EG:5888	NM_002875	1
HS.541221	SLC4A5	ILMN_2369571	24		final_47									57835	EG:57835	NM_133478	1
HS.551825	LOC642161	ILMN_1651403	24		final_1									28620	XM_936316	XM_936316	-1
HS.551825	GOSR2	ILMN_1656293	24		final_1									9570	EG:9570	NM_054022	-1
HS.551825	SNURF	ILMN_1660000	24		final_1									6638	EG:6638	NM_003097	-1
HS.551825	NBEAL2	ILMN_1660629	24		final_1									23218	XM_941211	XM_941211	1
HS.551825	ATG16L2	ILMN_1664644	24		final_1									89849	EG:89849	NM_033388	1
HS.551825	HSPC159	ILMN_1673548	24		final_1									29094	EG:29094	NM_014181	1
HS.551825	DNAH5	ILMN_1689829	24		final_1									1767	EG:1767	NM_001369	1
HS.551825	PLEKHO2	ILMN_1689968	24		final_1									80301	EG:80301	NM_025201	1
HS.551825	MGC42630	ILMN_1716555	24		final_1									286301	NM_175923	NM_175923	1
HS.551825	ZNF717	ILMN_1717644	24		final_1									377064	XM_936239	XM_936239	-1
HS.551825	RUNDC1	ILMN_1733875	24		final_1									146923	EG:146923	NM_173079	1
HS.551825	C16ORF79	ILMN_1759411	24		final_1									283870	EG:283870	NM_182563	1
HS.551825	RPS3	ILMN_1760714	24		final_1									6188	EG:6188	NM_001005	-1
HS.551825	ZNF519	ILMN_1786665	24		final_1									162655	XM_940357	XM_940357	-1
HS.551825	LOC347544	ILMN_1801795	24		final_1	o		2						347544	XM_293412	XM_293412	-1
HS.551825	HS.567464	ILMN_1821975	24		final_1									nm_002168	Hs.567464	NM_002168 NM_002560 NT_007914 NT_008413	-1	GTACCGTCAGCAACCTGGACAGAGCCTGACACTGATCGCAACTGCAAATC
HS.551825	HS.547738	ILMN_1823172	24		final_1									nm_003307	HS.547738	NM_003307 NM_000260 NM_004922 NM_198597 XM_001718726 XM_001716379 NT_007914	-1	TCCAGCAGGTAGTGCGAGGAGATTCGGCAGCTTATTTCTGTGCCAGCTCC
HS.551825	HS.512090	ILMN_1890134	24		final_1									nm_030785	Hs.512090	NM_030785 NM_003333 NM_001033930 NT_026437	-1	CGGTTTAAGAGGGCTGTTCTGGTATAGGCAAGATCCTGGGAAAGGCCCTG
HS.551825	HS.582263	ILMN_1914473	24		final_1									NM_005957 NM_001776	Hs.582263	NM_005957 NM_001776 NM_001098175 NT_006713 NT_009237	1	GGGACCATTCCTGTTTGGTTCTCCATTGTACCCTCAGAACTTATGCAGTC
HS.551825	C6ORF105	ILMN_2078592	24		final_1									84830	EG:84830	NM_032744	-1
HS.551825	RBMX	ILMN_2124951	24		final_1									27316	EG:27316	NM_002139	-1
HS.551825	RPS2	ILMN_2218277	24		final_1									6187	EG:6187	NM_002952	-1
HS.551825	PPIE	ILMN_2326737	24		final_1									10450	EG:10450	NM_203457	-1
HS.551825	TNFAIP8	ILMN_2414325	24		final_1									25816	EG:25816	NM_001077654	-1
HNRPR	CDC5L	ILMN_1652907	23		final_1									988	EG:988	NM_001253	-1
HNRPR	GSDML	ILMN_1666206	23		final_1									55876	EG:55876	NM_018530	1
HNRPR	CDC37	ILMN_1668369	23		final_1									11140	EG:11140	NM_007065	1
HNRPR	RBM15B	ILMN_1673024	23		final_1									29890	EG:29890	NM_013286	1
HNRPR	FAM120B	ILMN_1679641	23		final_1									84498	EG:84498	NM_032448	1
HNRPR	NSUN5C	ILMN_1681899	23		final_1									155400	EG:155400	NM_145645	1
HNRPR	CLDN15	ILMN_1682226	23		final_1									24146	EG:24146	NM_014343	1
HNRPR	LOC441775	ILMN_1695598	23		final_1									6141	EG:6141	NM_000979	1
HNRPR	TTC31	ILMN_1696375	23		final_1									64427	EG:64427	NM_022492	1
HNRPR	LOC613037	ILMN_1696843	23		final_1									440354	NR_002473	NR_002473	1
HNRPR	PLA2G4B	ILMN_1697629	23	connects 2 stars	final_1									8681	EG:8681	NM_005090	1
HNRPR	SFRS14	ILMN_1711270	23		final_1									10147	EG:10147	NM_014884	1
HNRPR	NUP62	ILMN_1738681	23		final_1									23636	EG:23636	NM_153719	1
HNRPR	PPP1R11	ILMN_1747598	23		final_1									6992	NM_021959	NM_021959	1
HNRPR	MZF1	ILMN_1749838	23		final_1									7593	EG:7593	NM_198055	1
HNRPR	SGSM2	ILMN_1779171	23		final_1									9905	EG:9905	NM_014853	1
HNRPR	METT11D1	ILMN_1782257	23		final_1									64745	NM_022734	NM_022734	1
HNRPR	MCM3AP	ILMN_1784766	23		final_1									8888	EG:8888	NM_003906	1
HNRPR	WDR59	ILMN_1795428	23		final_1									79726	EG:79726	NM_030581	1
HNRPR	KIAA0182	ILMN_1807767	23		final_1									23199	EG:23199	NM_014615	1
HNRPR	CTNNBL1	ILMN_2063925	23		final_1									56259	EG:56259	NM_030877	1
HNRPR	TAF1C	ILMN_2335072	23		final_1									9013	EG:9013	NM_139353	1
HNRPR	METTL9	ILMN_2402629	23		final_1									51108	EG:51108	NM_001077180	-1
LOC648814	RRAGB	ILMN_1651771	23		final_6									10325	EG:10325	NM_016656	-1
LOC648814	LOC729148	ILMN_1675542	23		final_6									389850	XM_372205	XM_372205	-1
LOC648814	ST3GAL1	ILMN_1683313	23		final_6									6482	EG:6482	NM_173344	1
LOC648814	WASF2	ILMN_1684051	23		final_6									10163	EG:10163	NM_006990	1
LOC648814	CHM	ILMN_1709112	23		final_6									1121	EG:1121	NM_000390	-1
LOC648814	VPS18	ILMN_1721575	23		final_6									57617	EG:57617	NM_020857	1
LOC648814	TSC22D4	ILMN_1721636	23		final_6									81628	EG:81628	NM_030935	1
LOC648814	ORAI1	ILMN_1724148	23		final_6									84876	EG:84876	NM_032790	1
LOC648814	C2ORF30	ILMN_1724376	23		final_6									27248	EG:27248	NM_015701	-1
LOC648814	TWSG1	ILMN_1726967	23		final_6									57045	EG:57045	NM_020648	-1
LOC648814	TRIM28	ILMN_1736575	23		final_6									10155	EG:10155	NM_005762	1
LOC648814	LYRM4	ILMN_1740927	23		final_6									57128	EG:57128	NM_020408	-1
LOC648814	FURIN	ILMN_1790228	23		final_6									5045	EG:5045	NM_002569	1
LOC648814	C16ORF63	ILMN_1790650	23		final_6									123811	EG:123811	NM_144600	-1
LOC648814	HSPA14	ILMN_1797318	23		final_6									51182	EG:51182	NM_016299	-1
LOC648814	CBS	ILMN_1804735	23		final_6									875	EG:875	NM_000071	1
LOC648814	CMTM4	ILMN_1815319	23	connects 2 stars	final_6									146223	EG:146223	NM_178818	-1
LOC648814	HS.568777	ILMN_1873620	23		final_6									nm_018320	Hs.568777	NM_018230 NM_173519 NM_014648 NT_030059	1	CTGAGGCATCCTGCTGTCATGGGAAGGTCTCCGCCCAAATGTCAGATGCA
LOC648814	HS.339809	ILMN_1889993	23		final_6									CPNE2	HS.339809	NM_173728 NM_005090 NM_212461 NM_002733 XM_001716957 XM_001714208 NT_010498	1	AAGGTGAAGCCTGCCTCTTGCTGTGCCCTCTCTAGCCAGTTCTAGCCCAG
LOC648814	WDR12	ILMN_2045729	23		final_6									55759	EG:55759	NM_018256	-1
LOC648814	STIM1	ILMN_2064694	23		final_6									6786	EG:6786	NM_003156	1
LOC648814	ZNF22	ILMN_2117904	23		final_6									7570	EG:7570	NM_006963	-1
LOC648814	SNAPC3	ILMN_2224300	23		final_6									6619	EG:6619	NM_001039697	-1
MAPK3	RAXL1	ILMN_1653412	23		final_6									84839	EG:84839	NM_032753	1
MAPK3	LOC90586	ILMN_1661052	23	connects 2 stars	final_6									90586	XR_000544	XR_000544	-1
MAPK3	KIAA0408	ILMN_1661519	23		final_6									9729	EG:9729	NM_014702	1
MAPK3	NFYB	ILMN_1668726	23		final_6									4801	EG:4801	NM_006166	1
MAPK3	HIST1H1A	ILMN_1692831	23		final_6									3024	EG:3024	NM_005325	1
MAPK3	LOC647834	ILMN_1693740	23		final_6									XM_943048	XM_943048	XM_943048	1
MAPK3	CRNN	ILMN_1727220	23		final_6									49860	EG:49860	NM_016190	-1
MAPK3	R3HCC1	ILMN_1735474	23		final_6									203069	EG:203069	XM_114618	-1
MAPK3	FLJ45994	ILMN_1777312	23		final_6									400645	XM_378742	XM_378742	1
MAPK3	VPS16	ILMN_1778078	23		final_6									64601	EG:64601	NM_080413	-1
MAPK3	MGC12760	ILMN_1780496	23		final_6									84809	XM_930480	XM_930480	1
MAPK3	PCNXL3	ILMN_1783350	23		final_6									399909	XM_941490	XM_941490	1
MAPK3	LOC653887	ILMN_1785709	23		final_6									MGC40405	XM_376148	XM_376148	-1
MAPK3	COPA	ILMN_1811615	23		final_6									1314	EG:1314	NM_004371	-1
MAPK3	CCDC21	ILMN_1812489	23		final_6									64793	EG:64793	NM_022778	-1
MAPK3	HS.579631	ILMN_1881909	23		final_6									NR_004436	Hs.579631	NT_011109	1	TTCCAGGGCACGAGTTCGAGGCCAGCCTGGTCCACATGGGTCGGaaaaaa
MAPK3	HS.163752	ILMN_1912662	23		final_6									nt_011109	Hs.163752	NT_011109 NW_001838496 NT_007819 NT_006238	1	CTGAGTAGGCCGGACTCGTGTGGCTCACGCCTGTAATCCCAGATGCTGTT
MAPK3	MBTD1	ILMN_2101650	23		final_6									54799	EG:54799	NM_017643	1
MAPK3	BLZF1	ILMN_2106658	23		final_6									8548	EG:8548	NM_003666	1
MAPK3	LEP	ILMN_2207505	23		final_6									3952	EG:3952	NM_000230	1
MAPK3	C6ORF170	ILMN_2228196	23		final_6									221322	EG:221322	NM_152730	1
MAPK3	CATSPER2	ILMN_2286014	23		final_6									117155	EG:117155	NM_172097	1
MAPK3	PPM1A	ILMN_2296045	23		final_6									5494	EG:5494	NM_177952	-1
POM121	LOC650909	ILMN_1657348	23		final_18									XM_935208.1	XM_935208	XM_935208	1
POM121	LOC653204	ILMN_1660976	23		final_18									MTMR1	XM_926469	XM_926469	1
POM121	LOC731640	ILMN_1661174	23		final_18									387753	XM_370611	XM_370611	-1
POM121	PJA1	ILMN_1667261	23		final_18									64219	EG:64219	NM_145119	1
POM121	CCDC58	ILMN_1686920	23		final_18									131076	NM_001017928	NM_001017928	-1
POM121	MAEA	ILMN_1689257	23		final_18									10296	NM_001017405	NM_001017405	1
POM121	DLC1	ILMN_1698020	23		final_18									10395	EG:10395	NM_024767	-1
POM121	B3GNT2	ILMN_1711102	23		final_18									10678	EG:10678	NM_006577	1
POM121	GMFG	ILMN_1711617	23		final_18									9535	EG:9535	NM_004877	-1
POM121	FLJ12688	ILMN_1718061	23		final_18									79613	EG:79613	XM_928238	1
POM121	TNFAIP2	ILMN_1727689	23		final_18									7127	EG:7127	NM_006291	1
POM121	CEBPZ	ILMN_1744147	23		final_18									10153	EG:10153	NM_005760	-1
POM121	ARHGAP30	ILMN_1750805	23		final_18									257106	EG:257106	NM_181720	1
POM121	CLPTM1L	ILMN_1752802	23		final_18									81037	EG:81037	NM_030782	1
POM121	GRAP2	ILMN_1778143	23		final_18									9402	EG:9402	NM_004810	-1
POM121	LOC650029	ILMN_1778381	23		final_18									XM_945483	XM_941861	XM_941861	1
POM121	CROCC	ILMN_1799672	23		final_18									9696	NM_014675	NM_014675	-1
POM121	RLF	ILMN_1801156	23		final_18									6018	EG:6018	NM_012421	-1
POM121	HS.570330	ILMN_1909895	23		final_18									NM_015055	Hs.570330	NM_015055 NM_020845 NT_011362	1	CCTAGCACTGTGACGGAGTGGAGCATCGGAAGGCTGAACTAGAAAAGGGC
POM121	PRKX	ILMN_2205050	23		final_18									5613	NM_005044	NM_005044	1
POM121	GNRHR2	ILMN_2224619	23		final_18									114814	NR_002328	NR_002328	-1
POM121	MBD1	ILMN_2352580	23		final_18									4152	EG:4152	NM_015844	1
POM121	HERPUD1	ILMN_2374159	23		final_18									9709	EG:9709	NM_001010990	1
SHROOM4	XRCC2	ILMN_1651569	23		final_106									7516	EG:7516	NM_005431	1
SHROOM4	ZNF483	ILMN_1668177	23		final_106									158399	EG:158399	NM_133464	1
SHROOM4	LOC648852	ILMN_1677691	23		final_106									6978	EG:648852	XM_940430	1
SHROOM4	MAGT1	ILMN_1721349	23		final_106									84061	EG:84061	NM_032121	1
SHROOM4	TDP1	ILMN_1726520	23		final_106									55775	EG:55775	NM_018319	1
SHROOM4	PLDN	ILMN_1733666	23		final_106									26258	EG:26258	NM_012388	1
SHROOM4	HNRNPU	ILMN_1743677	23		final_106									3192	EG:3192	NM_031844	1
SHROOM4	NLRP8	ILMN_1755027	23		final_106									126205	EG:126205	NM_176811	1
SHROOM4	ANKRD44	ILMN_1755049	23		final_106									91526	EG:91526	NM_153697	1
SHROOM4	TNFSF15	ILMN_1759501	23		final_106									9966	EG:9966	NM_005118	1
SHROOM4	GRIPAP1	ILMN_1761176	23		final_106									56850	EG:56850	NM_020137	1
SHROOM4	BRAP	ILMN_1772034	23		final_106									8315	EG:8315	NM_006768	-1
SHROOM4	C1ORF176	ILMN_1783996	23		final_106									64789	EG:64789	NM_022774	1
SHROOM4	LMOD3	ILMN_1785703	23		final_106									56203	EG:56203	NM_198271	1
SHROOM4	LOC643109	ILMN_1814820	23		final_106									1841	XM_932687	XM_932687	1
SHROOM4	HS.544637	ILMN_1872419	23		final_106									0	Hs.544637	XM_001722873 XM_001128001 NT_007592	1	CCCTTCCTAAAAAATTCTTCCAGTAGGCCGGGTGTGGTGGCTTATGCCTG
SHROOM4	HS.542993	ILMN_1904980	23		final_106									0	Hs.542993	NT_011520 NT_005612 NT_022184 NT_008046 NT_008583 NT_004487 NT_010718 NT_016297 NT_005403	1	ATACTCAAGGCCGGGTGCGGTGGCTCATACACATGGAGCAAGGAAGGACC
SHROOM4	YRDC	ILMN_2061732	23		final_106									79693	EG:79693	NM_024640	1
SHROOM4	C14ORF153	ILMN_2078724	23		final_106									84334	EG:84334	NM_032374	1
SHROOM4	CHRNA5	ILMN_2110751	23		final_106									1138	EG:1138	NM_000745	1
SHROOM4	ZNF14	ILMN_2173909	23		final_106									7561	EG:7561	NM_021030	1
SHROOM4	TDRD1	ILMN_2175094	23		final_106									56165	EG:56165	NM_198795	1
SHROOM4	NUSAP1	ILMN_2409298	23		final_106									51203	EG:51203	NM_018454	-1
CMTM4	LOC648814	ILMN_1658044	22	connects 2 stars	final_6									XM_943472	XM_943472	XM_943472	-1
CMTM4	SRRM1L	ILMN_1661664	22		final_6									401475	XM_932812	XM_932812	-1
CMTM4	TP53BP1	ILMN_1664440	22		final_6									7158	EG:7158	NM_005657	-1
CMTM4	IL8RB	ILMN_1680397	22		final_6									3579	EG:3579	NM_001557	-1
CMTM4	DYRK4	ILMN_1681269	22		final_6									8798	EG:8798	NM_003845	1
CMTM4	RCN1	ILMN_1698551	22		final_6									5954	EG:5954	NM_002901	1
CMTM4	ARCN1	ILMN_1699703	22		final_6									372	EG:372	NM_001655	-1
CMTM4	HOXB1	ILMN_1718079	22		final_6									3211	EG:3211	NM_002144	1
CMTM4	HERC3	ILMN_1741032	22		final_6									8916	EG:8916	NM_014606	-1
CMTM4	CENTB5	ILMN_1743847	22		final_6									116983	EG:116983	NM_030649	-1
CMTM4	GPR109A	ILMN_1750497	22		final_6									338442	NM_177551	NM_177551	-1
CMTM4	CR1	ILMN_1767193	22		final_6									1378	EG:1378	NM_000651	-1
CMTM4	ARL6IP5	ILMN_1769810	22		final_6									10550	EG:10550	NM_006407	1
CMTM4	LTBP3	ILMN_1777121	22		final_6									4054	EG:4054	XM_938706	-1
CMTM4	PGD	ILMN_1794165	22		final_6									5226	EG:5226	NM_002631	-1
CMTM4	PPP1R7	ILMN_1808333	22		final_6									5510	EG:5510	NM_002712	-1
CMTM4	HS.25318	ILMN_1837428	22		final_6									RAB27B	ENSG00000041353	NM_001039112 NT_025028	1	TTCTATATGCCCCTTAATAGACTGTGGTTCCTGACGCACACTGTTAGGTC
CMTM4	HS.438365	ILMN_1887008	22		final_6									NM_198441	Hs.438365	XM_001132965 XM_001132961 XM_001132957 XM_001132952 NM_198441 XM_001719299 XM_001133584 XM_001128325 NM_001029875 NT_010194	1	AAGTGGCATGTGGCTTCCTCCTGGCTTTCTCTGGGATCAGTAGTTCTGGG
CMTM4	HS.570636	ILMN_1913537	22		final_6									0	Hs.570636	XM_001724146 XM_001719806 XM_001725284 XM_001724587 XM_001723812 XM_001726540 NT_022517	-1	CCCATCCTCCATGGCCCAGAGAGAAAACCCAGGACAAAACCTTGGAGAAG
CMTM4	DVL3	ILMN_2137464	22		final_6									1857	EG:1857	NM_004423	-1
CMTM4	TM9SF1	ILMN_2333440	22		final_6									10548	EG:10548	NM_001014842	-1
CMTM4	GRK6	ILMN_2357015	22		final_6									2870	EG:2870	NM_002082	-1
HS.170953	TMEM120A	ILMN_1654516	22		final_0									83862	EG:83862	NM_031925	-1
HS.170953	FLJ11151	ILMN_1662865	22		final_0									55313	EG:55313	NM_018340	-1
HS.170953	ATF5	ILMN_1669113	22		final_0									22809	EG:22809	NM_012068	1
HS.170953	ZNF281	ILMN_1683127	22		final_0									23528	EG:23528	NM_012482	-1
HS.170953	FLJ20273	ILMN_1689046	22		final_0									54502	EG:54502	NM_019027	-1
HS.170953	CXXC1	ILMN_1691276	22		final_0									30827	EG:30827	NM_014593	1
HS.170953	ETV3L	ILMN_1702657	22		final_0									440695	EG:440695	NM_001004341	1
HS.170953	TLR1	ILMN_1731048	22		final_0									7096	EG:7096	NM_003263	-1
HS.170953	SIPA1L2	ILMN_1732923	22		final_0									57568	EG:57568	NM_020808	-1
HS.170953	LOC730740	ILMN_1748767	22		final_0									XM_930111.1	XM_930111	XM_930111	-1
HS.170953	MCL1	ILMN_1756806	22		final_0									4170	EG:4170	NM_021960	-1
HS.170953	DOK4	ILMN_1774261	22		final_0									55715	EG:55715	NM_018110	-1
HS.170953	KARS	ILMN_1777584	22		final_0									3735	EG:3735	NM_005548	1
HS.170953	HNRNPH2	ILMN_1781764	22		final_0									3188	EG:3188	NM_001032393	-1
HS.170953	LOC653604	ILMN_1793461	22		final_0									XM_497711	XM_497711	XM_497711	-1
HS.170953	PCTP	ILMN_1802257	22		final_0	o		-2	-2	-2				58488	EG:58488	NM_021213	-1
HS.170953	ANP32A	ILMN_1807945	22		final_0									8125	EG:8125	NM_006305	-1
HS.170953	HS.560344	ILMN_1821127	22		final_0									CK905457	Hs.560344	NT_010194	-1	TCCAGCAAACGAAAAGCTGATTTGGTGCAACGACTTGGAATGCCCCCAGG
HS.170953	HS.492066	ILMN_1829330	22		final_0									DKFZp686G02263	Hs.492066	NT_008183	1	AGGAGGATCTCCAGGAAGGATCTTGCAGGCCTTGAACAAAAGTTCACTGG
HS.170953	CPSF4	ILMN_2357260	22		final_0									10898	EG:10898	NM_001081559	1
HS.170953	KIAA1191	ILMN_2376133	22		final_0									57179	EG:57179	NM_020444	1
HS.170953	VAPA	ILMN_2405190	22		final_0									9218	EG:9218	NM_194434	-1
MAP2K6	LOC644250	ILMN_1654320	22		final_6									XM_929199.1	XM_929199	XM_929199	-1
MAP2K6	GPR1	ILMN_1655348	22		final_6									2825	EG:2825	NM_005279	-1
MAP2K6	LOC90586	ILMN_1661052	22	connects 2 stars	final_6									90586	XR_000544	XR_000544	1
MAP2K6	FLJ46309	ILMN_1661303	22		final_6									NM_001039797	XM_941608	XM_941608	-1
MAP2K6	LOC653086	ILMN_1667500	22		final_6									RANBP2L1	XM_930963	XM_930963	-1
MAP2K6	AIRE	ILMN_1670282	22		final_6									326	EG:326	NM_000659	-1
MAP2K6	USP49	ILMN_1680279	22		final_6									25862	EG:25862	NM_018561	-1
MAP2K6	SYAP1	ILMN_1698470	22		final_6									94056	EG:94056	NM_032796	-1
MAP2K6	LOC653489	ILMN_1711073	22		final_6									RGP3	XM_934113	XM_934113	-1
MAP2K6	EIF2AK4	ILMN_1755114	22		final_6									440275	EG:440275	NM_001013703	-1
MAP2K6	KIAA1751	ILMN_1763521	22		final_6									85452	EG:85452	XM_933934	-1
MAP2K6	PLA2G2D	ILMN_1788811	22		final_6									26279	EG:26279	NM_012400	-1
MAP2K6	DPY19L1	ILMN_1791296	22		final_6									23333	EG:23333	XM_938743	1
MAP2K6	DTWD2	ILMN_1794882	22		final_6									285605	EG:285605	NM_173666	-1
MAP2K6	CDAN1	ILMN_1805180	22		final_6									146059	EG:146059	NM_138477	-1
MAP2K6	NUBPL	ILMN_2048811	22		final_6									80224	EG:80224	NM_025152	-1
MAP2K6	FAM73A	ILMN_2123559	22		final_6									374986	EG:374986	NM_198549	-1
MAP2K6	C5ORF28	ILMN_2150465	22		final_6									64417	EG:64417	NM_022483	-1
MAP2K6	FAM40B	ILMN_2161285	22		final_6									57464	EG:57464	NM_020704	-1
MAP2K6	LSDP5	ILMN_2209993	22		final_6									440503	EG:440503	NM_001013706	-1
MAP2K6	GSTTP2	ILMN_2246548	22		final_6									NR_003082	NR_003082	NR_003082	-1
MAP2K6	ZNF557	ILMN_2346137	22		final_6									79230	EG:79230	NM_001044387	-1
RAB13	KRTCAP2	ILMN_1658802	22		final_12									200185	EG:200185	NM_173852	1
RAB13	LOC401115	ILMN_1668629	22		final_12									401115	EG:401115	XM_937968	1
RAB13	ANAPC11	ILMN_1674988	22		final_12									51529	EG:51529	XM_942695	1
RAB13	REXO4	ILMN_1677452	22		final_12									57109	EG:57109	NM_020385	1
RAB13	RNMTL1	ILMN_1689652	22		final_12									55178	EG:55178	NM_018146	1
RAB13	PHB	ILMN_1692651	22		final_12									5245	EG:5245	NM_002634	1
RAB13	C1ORF85	ILMN_1698243	22		final_12									112770	EG:112770	NM_144580	1
RAB13	C14ORF93	ILMN_1724897	22		final_12									60686	EG:60686	NM_021944	1
RAB13	MRPS18A	ILMN_1730391	22		final_12									55168	EG:55168	NM_018135	1
RAB13	PSMC5	ILMN_1780189	22		final_12									5705	EG:5705	NM_002805	1
RAB13	RNF113A	ILMN_1786388	22		final_12									7737	EG:7737	NM_006978	1
RAB13	CDKN1A	ILMN_1787212	22		final_12									1026	EG:1026	NM_078467	1
RAB13	ASTE1	ILMN_1803813	22		final_12									28990	EG:28990	NM_014065	1
RAB13	ZNF2	ILMN_1812222	22		final_12									7549	EG:7549	NM_021088	1
RAB13	ZSWIM1	ILMN_1812856	22		final_12									90204	EG:90204	NM_080603	1
RAB13	HS.22302	ILMN_1840934	22		final_12									NM_006766	Hs.22302	XR_040596 NM_001099413 NM_006766 NM_001099412 NT_035014	1	TGGAAATTTGGGGAGGGTGGTTTGTCAGTATAAGGCCCTGTGGGGTAATC
RAB13	HS.562138	ILMN_1884246	22		final_12									NM_013361	Hs.562138	NM_013361 NT_004487	1	AACTGCTGGATCAATGAATTCTGATACACGCTGCCAAGCATGTGGGCCAA
RAB13	HS.576398	ILMN_1899729	22		final_12									NM_001844	Hs.576398	XR_041102 XR_019452 XM_001719902 NM_001844 NM_033150 NT_032977	1	GTGACACGGGGGACCTGGAGGAACAGGAAGCAATGGTGATCTCAGCAGTC
RAB13	NUDC	ILMN_2097546	22		final_12									10726	EG:10726	NM_006600	1
RAB13	GYG1	ILMN_2230862	22		final_12									2992	EG:2992	NM_004130	-1
RAB13	MRPL52	ILMN_2311041	22		final_12									122704	EG:122704	NM_181306	1
RAB13	C1ORF2	ILMN_2346769	22		final_12									10712	EG:10712	NM_198264	1
DAAM1	MED23	ILMN_1662488	21		final_2									9439	EG:9439	NM_015979	1
DAAM1	SON	ILMN_1668463	21		final_2									6651	EG:6651	NM_058183	1
DAAM1	GAPVD1	ILMN_1671221	21		final_2									26130	EG:26130	NM_015635	1
DAAM1	LOC651401	ILMN_1672600	21		final_2									651401	XM_944646	XM_944646	-1
DAAM1	PELI1	ILMN_1679268	21		final_2									57162	EG:57162	NM_020651	1
DAAM1	PAPD4	ILMN_1681845	21		final_2									167153	EG:167153	NM_173797	1
DAAM1	CMTM6	ILMN_1696494	21		final_2									54918	EG:54918	NM_017801	1
DAAM1	RBM12	ILMN_1701229	21		final_2									8904	EG:8904	NM_003915	1
DAAM1	ANKRD17	ILMN_1712019	21		final_2									26057	EG:26057	NM_198889	1
DAAM1	FSTL4	ILMN_1712308	21		final_2									23105	EG:23105	NM_015082	-1
DAAM1	USP3	ILMN_1725862	21		final_2									9960	EG:9960	NM_006537	1
DAAM1	PRPF4B	ILMN_1736021	21		final_2									8899	NM_003913	NM_003913	1
DAAM1	ABI3	ILMN_1755658	21		final_2									51225	EG:51225	NM_016428	-1
DAAM1	H1F0	ILMN_1757467	21		final_2									3005	EG:3005	NM_005318	-1
DAAM1	TIPARP	ILMN_1765578	21		final_2									25976	EG:25976	NM_015508	1
DAAM1	STAU2	ILMN_1769720	21		final_2									27067	EG:27067	NM_014393	1
DAAM1	PAPOLA	ILMN_1798354	21		final_2									10914	EG:10914	NM_032632	1
DAAM1	SMG1	ILMN_1801383	21		final_2									23049	EG:23049	NM_015092	1
DAAM1	CSRP1	ILMN_1811921	21		final_2									1465	EG:1465	NM_004078	-1
DAAM1	HS.527515	ILMN_1828216	21		final_2									NM_001029989	Hs.527515	NM_001029989 NM_014736 NT_032977	1	CCCAGTTTCAGCAAGGCAAAATGATGGGACTCTCAAACCTCCCTCCTCAT
DAAM1	TRIM33	ILMN_2351930	21		final_2									51592	EG:51592	NM_033020	1
MLKL	C14ORF2	ILMN_1652722	21		final_1									9556	EG:9556	NM_004894	1
MLKL	POLE4	ILMN_1660063	21		final_1									56655	EG:56655	NM_019896	1
MLKL	WDR61	ILMN_1665887	21		final_1									80349	EG:80349	NM_025234	1
MLKL	LSMD1	ILMN_1691131	21		final_1									84316	EG:84316	NM_032356	1
MLKL	BLVRA	ILMN_1691436	21		final_1									644	EG:644	NM_000712	1
MLKL	LYRM2	ILMN_1703132	21		final_1									57226	EG:57226	NM_020466	1
MLKL	MRPL33	ILMN_1706326	21		final_1	o			2					9553	EG:9553	NM_004891	1
MLKL	CKS1B	ILMN_1719256	21		final_1									1163	NM_001826	NM_001826	1
MLKL	LOC653147	ILMN_1720438	21		final_1									654094	XM_939231	XM_939231	1
MLKL	PARK7	ILMN_1744713	21		final_1									11315	EG:11315	NM_007262	1
MLKL	ANG	ILMN_1760727	21		final_1									283	EG:283	NM_001145	1
MLKL	CD86	ILMN_1782560	21	connects 2 stars	final_1									942	EG:942	NM_175862	1
MLKL	RPS21	ILMN_1800573	21		final_1	o	0		2					6227	EG:6227	NM_001024	1
MLKL	GSTO1	ILMN_1808196	21	connects 2 stars	final_1									9446	EG:9446	NM_004832	1
MLKL	NDUFB7	ILMN_1813604	21		final_1									4713	EG:4713	NM_004146	1
MLKL	PSMB7	ILMN_1814156	21		final_1	o		2						5695	EG:5695	NM_002799	1
MLKL	MRPL14	ILMN_2072603	21		final_1									64928	EG:64928	NM_032111	1
MLKL	FUCA2	ILMN_2085362	21		final_1									2519	EG:2519	NM_032020	1
MLKL	VAMP8	ILMN_2190084	21		final_1									8673	EG:8673	NM_003761	1
MLKL	MS4A7	ILMN_2331087	21		final_1									58475	EG:58475	NM_206938	1
MLKL	CTSL1	ILMN_2374036	21		final_1									1514	EG:1514	NM_145918	1
DPAGT1	LOC653884	ILMN_1658460	20		final_1									10772	NM_006625	NM_006625	1
DPAGT1	GNAQ	ILMN_1659923	20		final_1									2776	EG:2776	NM_002072	1
DPAGT1	LOC440349	ILMN_1667169	20		final_1									440349	XM_930054	XM_930054	1
DPAGT1	MGC72104	ILMN_1688318	20		final_1									284802	NM_207350	NM_207350	1
DPAGT1	MAPKAP1	ILMN_1691526	20		final_1									79109	EG:79109	NM_001006618	1
DPAGT1	RBM4	ILMN_1709042	20		final_1									5936	EG:5936	NM_002896	1
DPAGT1	GBP3	ILMN_1725314	20		final_1									2635	EG:2635	NM_018284	-1
DPAGT1	LOC653994	ILMN_1729832	20		final_1									7458	NM_022170	NM_022170	1
DPAGT1	DKFZP564O0523	ILMN_1742276	20		final_1									84060	EG:84060	NM_032120	1
DPAGT1	ALG12	ILMN_1743995	20		final_1									79087	EG:79087	NM_024105	-1
DPAGT1	MDM4	ILMN_1746020	20		final_1									4194	EG:4194	NM_002393	1
DPAGT1	STAG3L1	ILMN_1760682	20		final_1									54441	NM_018991	NM_018991	1
DPAGT1	LOC643475	ILMN_1766741	20		final_1									XM_940123	XM_928745	XM_928745	1
DPAGT1	LBR	ILMN_1768969	20		final_1									3930	EG:3930	NM_002296	1
DPAGT1	LOC644063	ILMN_1770697	20		final_1									647615	XM_936695	XM_936695	1
DPAGT1	FLJ12334	ILMN_1775664	20		final_1									400946	XM_943793	XM_943793	1
DPAGT1	CTNNB1	ILMN_1785786	20		final_1									1499	EG:1499	XM_945654	1
DPAGT1	GPR101	ILMN_1796431	20		final_1									83550	EG:83550	NM_054021	1
DPAGT1	HM13	ILMN_1807833	20		final_1									81502	EG:81502	NM_030789	1
DPAGT1	CXCR4	ILMN_2246410	20		final_1									7852	EG:7852	NM_001008540	1
INSR	LOC440704	ILMN_1673421	20		final_26									440704	XM_944716	XM_944716	-1
INSR	IHPK1	ILMN_1700231	20		final_26	o		-2						9807	EG:9807	NM_153273	-1
INSR	LOC653226	ILMN_1708627	20		final_26									XM_938116	XM_938116	XM_938116	1
INSR	CAMLG	ILMN_1714599	20		final_26									819	EG:819	NM_001745	1
INSR	DUT	ILMN_1721008	20		final_26									1854	EG:1854	NM_001025248	1
INSR	PREI3	ILMN_1733356	20		final_26									25843	EG:25843	NM_199482	1
INSR	FLII	ILMN_1737170	20		final_26									2314	EG:2314	NM_002018	-1
INSR	C8ORF76	ILMN_1742074	20		final_26									84933	EG:84933	NM_032847	1
INSR	ILF2	ILMN_1745172	20		final_26	o			2					3608	EG:3608	NM_004515	1
INSR	RPL4	ILMN_1752285	20		final_26									6124	EG:6124	NM_000968	1
INSR	DNAJB11	ILMN_1753243	20		final_26									51726	EG:51726	NM_016306	1
INSR	PPA2	ILMN_1755041	20		final_26									27068	EG:27068	NM_176869	-1
INSR	INTS3	ILMN_1756086	20		final_26									65123	EG:65123	NM_023015	-1
INSR	RPL35A	ILMN_1756360	20		final_26									6165	NM_000996	NM_000996	1
INSR	LOC642947	ILMN_2049343	20		final_26									NM_001039895.1	NM_001039895	NM_001039895	-1
INSR	PNRC2	ILMN_2147306	20		final_26									55629	EG:55629	NM_017761	1
INSR	RPS19BP1	ILMN_2177965	20		final_26									91582	EG:91582	NM_194326	1
INSR	C6ORF48	ILMN_2285708	20		final_26									50854	NM_001040437	NM_001040437	1
INSR	NAT5	ILMN_2354140	20		final_26									51126	EG:51126	NM_181528	1
INSR	LILRB3	ILMN_2406132	20		final_26									11025	EG:11025	NM_006864	-1
KCNMA1	RFX4	ILMN_1669370	20		final_1									5992	EG:5992	NM_032491	-1
KCNMA1	MYO9B	ILMN_1672547	20		final_1									4650	EG:4650	NM_004145	-1
KCNMA1	NDUFAF2	ILMN_1682857	20		final_1									91942	NM_174889	NM_174889	1
KCNMA1	C2ORF64	ILMN_1683065	20		final_1									493753	EG:493753	NM_001008215	1
KCNMA1	SFRS8	ILMN_1692575	20		final_1									6433	EG:6433	NM_004592	-1
KCNMA1	TTYH3	ILMN_1692731	20		final_1									80727	EG:80727	NM_025250	-1
KCNMA1	G6PD	ILMN_1697559	20		final_1									2539	EG:2539	NM_000402	-1
KCNMA1	LOC400721	ILMN_1700182	20		final_1									XM_930560	XM_930560	XM_930560	-1
KCNMA1	CLASP1	ILMN_1700507	20		final_1									23332	EG:23332	NM_015282	-1
KCNMA1	ORAI3	ILMN_1736628	20		final_1									93129	EG:93129	NM_152288	-1
KCNMA1	MTF1	ILMN_1763828	20		final_1									4520	EG:4520	NM_005955	-1
KCNMA1	COQ5	ILMN_1770936	20		final_1									84274	EG:84274	NM_032314	1
KCNMA1	OCIAD2	ILMN_1772286	20	connects 2 stars	final_1									132299	EG:132299	NM_152398	1
KCNMA1	TAPBP	ILMN_1782851	20		final_1									6892	EG:6892	NM_172209	-1
KCNMA1	MED12	ILMN_1793386	20		final_1									9968	EG:9968	NM_005120	-1
KCNMA1	MARS	ILMN_1799819	20		final_1									4141	EG:4141	NM_004990	-1
KCNMA1	MANBA	ILMN_1800733	20		final_1									4126	EG:4126	NM_005908	-1
KCNMA1	CCDC109B	ILMN_1801766	20		final_1									55013	EG:55013	NM_017918	1
KCNMA1	ITM2A	ILMN_2076600	20		final_1									9452	EG:9452	NM_004867	1
KCNMA1	ORC6L	ILMN_2215061	20		final_1									23594	EG:23594	NM_014321	-1
